# Supplementary material
Source: PubMed Central journal article supplement (PMC8257417)
Supplement: mmc1.pdf [file mmc1.pdf]

We gratefully acknowledge the following Authors from the Originating laboratories responsible for obtaining the specimens, as well as the Submitting laboratories where the genome data were generated and shared via GISAID, on which this research is based.

All Submitters of data may be contacted directly via [www.gisaid.org](http://www.gisaid.org)

Authors are sorted alphabetically.

| Accession ID                                                                                                                         | Originating Laboratory                                                                                                                                                                                                                                                                                                                                                                                                                                                                                                                                                                                                                                                                                                                                                           | Submitting Laboratory                                                                                                                                                                                                                                                                                                                                                    | Authors                                                                                                                                                                                                                                                                                                                                                                                                                                                                                                                                                                                                                                                                                                                                                                                                                                                                                                                                                                                                                                                                 |
|--------------------------------------------------------------------------------------------------------------------------------------|----------------------------------------------------------------------------------------------------------------------------------------------------------------------------------------------------------------------------------------------------------------------------------------------------------------------------------------------------------------------------------------------------------------------------------------------------------------------------------------------------------------------------------------------------------------------------------------------------------------------------------------------------------------------------------------------------------------------------------------------------------------------------------|--------------------------------------------------------------------------------------------------------------------------------------------------------------------------------------------------------------------------------------------------------------------------------------------------------------------------------------------------------------------------|-------------------------------------------------------------------------------------------------------------------------------------------------------------------------------------------------------------------------------------------------------------------------------------------------------------------------------------------------------------------------------------------------------------------------------------------------------------------------------------------------------------------------------------------------------------------------------------------------------------------------------------------------------------------------------------------------------------------------------------------------------------------------------------------------------------------------------------------------------------------------------------------------------------------------------------------------------------------------------------------------------------------------------------------------------------------------|
| EPI_ISL_1167044                                                                                                                      | "Dr. Andrija Stampar" Teaching Institute of Public Health, Department of Clinical Microbiology                                                                                                                                                                                                                                                                                                                                                                                                                                                                                                                                                                                                                                                                                   | Istituto di Genomica Applicata                                                                                                                                                                                                                                                                                                                                           | Davide Scaglione; Eleonora Paparelli; Fedrica Cattonaro; Gabriele Magris; Irena Jurman; Jasmina Vranes; Michele Morgante; Slobodanka Radovic; Vera Vendramin                                                                                                                                                                                                                                                                                                                                                                                                                                                                                                                                                                                                                                                                                                                                                                                                                                                                                                            |
| EPI_ISL_2162133, EPI_ISL_2162161                                                                                                     | "National Center of Expertise" CSEC MH RK in Almaty city                                                                                                                                                                                                                                                                                                                                                                                                                                                                                                                                                                                                                                                                                                                         | Reference laboratory for the control of viral infections                                                                                                                                                                                                                                                                                                                 | Aidar Ussebayev; Aknur Mutaliyeva; Andrey Komissarov; Artem Fadeev; Azamat Kenessov; Bekzhan Maikotov; Gaukhar Nussupbayeva; Madina Tleubergenova; Maria Pisareva; Nazym Tleumbetova                                                                                                                                                                                                                                                                                                                                                                                                                                                                                                                                                                                                                                                                                                                                                                                                                                                                                    |
| EPI_ISL_1823868                                                                                                                      | "OK Public Health Laboratory, Oklahoma State DOH"                                                                                                                                                                                                                                                                                                                                                                                                                                                                                                                                                                                                                                                                                                                                | Centers for Disease Control and Prevention Division of Viral Diseases, Pathogen Discovery                                                                                                                                                                                                                                                                                | Alison Laufer Halpin; Ben L. Rambo-Martin; Clinton R. Paden; Dakota Howard; Darlene Wagner; Dave Wentworth; Dhvani Batra; Jasmine Padilla; Justin Lee; Katie Dillon; Krista Queen; Kristen Knipe; Kristine Lacek; Mark Burroughs; Matthew Schmeer; Mili Sheth; Peter Cook; Sam Shepard; Sarah Nobles; Shoshona Le; Suxiang Tong; Vivien Dugan; Yvette Unoarumhi                                                                                                                                                                                                                                                                                                                                                                                                                                                                                                                                                                                                                                                                                                         |
| EPI_ISL_2162127                                                                                                                      | "Olymp" CDL                                                                                                                                                                                                                                                                                                                                                                                                                                                                                                                                                                                                                                                                                                                                                                      | Reference laboratory for the control of viral infections                                                                                                                                                                                                                                                                                                                 | Aidar Ussebayev; Aknur Mutaliyeva; Andrey Komissarov; Artem Fadeev; Azamat Kenessov; Bekzhan Maikotov; Gaukhar Nussupbayeva; Madina Tleubergenova; Maria Pisareva; Nazym Tleumbetova                                                                                                                                                                                                                                                                                                                                                                                                                                                                                                                                                                                                                                                                                                                                                                                                                                                                                    |
| EPI_ISL_707700, EPI_ISL_763067                                                                                                       | 1-Laboratory of Microbiology, National Reference Lab, Charles Nicolle Hospital; 2-University of Tunis ElManar, Faculty of Medicine of Tunis, LR99ES09, Tunis, Tunisia                                                                                                                                                                                                                                                                                                                                                                                                                                                                                                                                                                                                            | 1-Clinical and Experimental Pharmacology Lab, LR16SP02, National Center of Pharmacovigilance, University of Tunis El Manar, Tunis, Tunisia. 2-Neurodegenerative diseases and psychiatric troubles, LR18SP03, Razi Hospital, University of Tunis El Manar, Tunis, Tunisia. 3- Ministry of Health, National Observatory of New and Emerging Diseases, 1006, Tunis, Tunisia | Alia Ben Kahla; Asma Ferjani; Awatef El Moussi; Gaies Emna; Habiba Ben Romdhane; Hanen El Jebari; Ilhem Boutiba-Ben Boubaker; Ines Mdingi; Jalila Ben Khelil; Maher Kharrat; Mouna Ben Sassi; Mouna Safer; Nissaf Ben Aleya; Riadh Daghdhous; Riadh Gouider.; Rouaa Ben Othman; Salma Abid; Sameh Trabelsi; Sana Ferjani; Souissi Amira; Zaineb Hamzaoui                                                                                                                                                                                                                                                                                                                                                                                                                                                                                                                                                                                                                                                                                                                |
| EPI_ISL_1497762                                                                                                                      | 1. Główny Inspektorat Sanitarny. 2. Diagnostyka. Laboratoria Medyczne.                                                                                                                                                                                                                                                                                                                                                                                                                                                                                                                                                                                                                                                                                                           | 1. ViroGenetics - BSL3 Laboratory of Virology, Maopolska Centre of Biotechnology, Jagiellonian University; 2. genXone SA, Research & Development Laboratory                                                                                                                                                                                                              | Aleksandra Gidlewicz; Anna Brylak; Gromowski, T.; Grzegorz Nowicki; Jakub Grabowski; Karol Szeszeko; Kowalski, M.; Labaj; Maciej Sykulski; Mazur-Panasiuk, N.; Micha Kaszuba; Natalia Drweska-Matelska; P.P.; Pyrc, K.; Sylwia Januszczak; Szulc, P.; ukasz Krych                                                                                                                                                                                                                                                                                                                                                                                                                                                                                                                                                                                                                                                                                                                                                                                                       |
| EPI_ISL_1341079                                                                                                                      | 1. Główny Inspektorat Sanitarny; 2. Diagnostyka. Laboratoria Medyczne.                                                                                                                                                                                                                                                                                                                                                                                                                                                                                                                                                                                                                                                                                                           | 1. ViroGenetics - BSL3 Laboratory of Virology, Maopolska Centre of Biotechnology, Jagiellonian University; 2. Diagtron Laboratoria Lukasz Rabalski                                                                                                                                                                                                                       | Gromowski, T.; Kowalski, M.; Labaj; Maciej Kosinski; Mazur-Panasiuk, N.; Natalia Derewonko; P.P.; Pyrc, K.; Rabalski L.; Sylwia Januszczak; Szulc, P.                                                                                                                                                                                                                                                                                                                                                                                                                                                                                                                                                                                                                                                                                                                                                                                                                                                                                                                   |
| EPI_ISL_1361623                                                                                                                      | 1.AO Universitaria 'S. Giovanni di Dio e Ruggi D'Aragona, Scuola Medica Salernitana' Hospital / 2.UOC di Virologia e Microbiologia, Università della Campania 'L. Vanvitelli' / 3.AO Universitaria 'Federico II' Napoli Hospital / 4.AORN 'San Giuseppe Moscati' Avellino Hospital / 5.AO 'San Pio - presidio G. Rummo' Benevento Hospital / 6.AO 'Sant'Anna e San Sebastiano' Caserta Hospital / 7.PO 'Maria Santissima Addolorata' Eboli Hospital / 8.Biogen Istituto di Ricerche Genetiche / 9. U.O.C. di Genetica Medica e di Laboratorio A.O.R.N., Azienda Ospedaliera di Rilievo Nazionale Antonio Cardarelli, Napoli / 10. Centro di riferimento Oncologico della Basilicata (IRCCS-CROB), Rionero in Vulture (PZ) / 11. Presidio Ospedaliero di Agropoli, Agropoli (SA). | 1. Genome Research Center for Health (CRGS) / 2. Laboratory of Molecular Medicine and Genomics(LMMGe) / 3. Center for Research in Pure and Applied Mathematics (CRMPA)                                                                                                                                                                                                   | Alessandro Weisz (Corresponding Author); Alessia Cossu; Andreina Baj; Aniello Gentile; Annamaria Salvati; Antonello Saccomanno; Arnolfo Petruzzello; Assunta Sellitto; Carlo Ferravante; Domenico Memoli; Domenico Palumbo; Edmondo Adorisio; Elena Alexandrova; Emilia Vaccaro; Fausto Sessa.; Francesca Marciano; Francesca Rizzo (Corresponding Author); Francesco Curcio; Gianluigi Franci; Giorgio Dirani; Giorgio Giurato (Corresponding Author); Giovanni Nassa; Giovanni Pecoraro; Giuseppe Fenza; Giuseppe Portella; Gregorio Goffredi; Ilaria Terenzi; Jessica Lamberti; Maddalena Schioppa; Maria Grazia Foti; Maria Landi; Marianna Scrima; Mariaosaria Ingino; Massimiliano Galdiero; Maurizio Furni; Michela Iacobellis; Michele Caraglia; Michele Cennamo; Morena D'Avenia; Oriana Strianese; Pasquale Pagliano; Rita Greco; Roberta Tarallo; Rosanna Piluscio; Silvia Zanolì; Simona Sempri; Sonia Amabile; Stefania Marzinotto; Teresa Rocco; Valeria Mirici Cappa; Vincenzo Rocco; Viola Melone; Vittoria Letizia; Vittorio Sambri; Ylenia D'Agostino |
| EPI_ISL_1166063                                                                                                                      | 24023 PLATEFORME MGI COVID                                                                                                                                                                                                                                                                                                                                                                                                                                                                                                                                                                                                                                                                                                                                                       | CNR Virus des Infections Respiratoires - France SUD                                                                                                                                                                                                                                                                                                                      | Antonin Bal; Bruno Lina; Gregory Destras; Gwendolyne Burfin; Hadrien Regue; Laurence Josset; Martine Valette; Quentin Semanas                                                                                                                                                                                                                                                                                                                                                                                                                                                                                                                                                                                                                                                                                                                                                                                                                                                                                                                                           |
| EPI_ISL_498512, EPI_ISL_498520, EPI_ISL_1170946, EPI_ISL_1170947, EPI_ISL_1208400, EPI_ISL_1208401, EPI_ISL_1208402, EPI_ISL_1807318 | see above                                                                                                                                                                                                                                                                                                                                                                                                                                                                                                                                                                                                                                                                                                                                                                        | ACT Pathology                                                                                                                                                                                                                                                                                                                                                            | Schwessinger Lab                                                                                                                                                                                                                                                                                                                                                                                                                                                                                                                                                                                                                                                                                                                                                                                                                                                                                                                                                                                                                                                        |
| EPI_ISL_1094319                                                                                                                      | AK State Public Health Lab, State Health Department                                                                                                                                                                                                                                                                                                                                                                                                                                                                                                                                                                                                                                                                                                                              | Respiratory Viruses Branch, Division of Viral Diseases, Centers for Disease Control and Prevention                                                                                                                                                                                                                                                                       | Ashley Jones; Benjamin Schwessinger; Craig Kennedy; Karina Kennedy; Kevin Murray; Megan McDonald; Ming-Dao Chia; Robert Lanfear; Robyn N Hall                                                                                                                                                                                                                                                                                                                                                                                                                                                                                                                                                                                                                                                                                                                                                                                                                                                                                                                           |
| EPI_ISL_2087014, EPI_ISL_2087029                                                                                                     | AMPATH LABORATORIES                                                                                                                                                                                                                                                                                                                                                                                                                                                                                                                                                                                                                                                                                                                                                              | National Institute for Communicable Diseases of the National Health Laboratory Service                                                                                                                                                                                                                                                                                   | Anna Montmayeur; Anna Uehara; Ben L. Rambo-Martin; Clinton R. Paden; Dhvani Batra; Haibin Wang; Jasmine Padilla; Jing Zhang; Justin Lee; Krista Queen; Lori Rowe; Mark Burroughs; Mili Sheth; Peter W. Cook; Rachel Marine; Sarah Nobles; Suxiang Tong; Yan Li; Ying Tao                                                                                                                                                                                                                                                                                                                                                                                                                                                                                                                                                                                                                                                                                                                                                                                                |
| EPI_ISL_467452                                                                                                                       | AMPATH-DBN                                                                                                                                                                                                                                                                                                                                                                                                                                                                                                                                                                                                                                                                                                                                                                       | KRISP, KZN Research Innovation and Sequencing Platform                                                                                                                                                                                                                                                                                                                   | Amoako DG; Bhiman JN; Ismail A; Mahlangu B; Mohale T; Ntuli N; Scheepers C                                                                                                                                                                                                                                                                                                                                                                                                                                                                                                                                                                                                                                                                                                                                                                                                                                                                                                                                                                                              |
| EPI_ISL_1820928                                                                                                                      | ANALIZAR LABORATORIO CLINICO AUTOMATIZADO - SYNLAB                                                                                                                                                                                                                                                                                                                                                                                                                                                                                                                                                                                                                                                                                                                               | Instituto Nacional de Salud- Dirección de Investigación en Salud Pública                                                                                                                                                                                                                                                                                                 | Chimukangara B; Giandhari J; Khan S; Lessells R; Mdalose K; Pillay S; Tegally H; Wilkinson E; York D; de Oliveira T                                                                                                                                                                                                                                                                                                                                                                                                                                                                                                                                                                                                                                                                                                                                                                                                                                                                                                                                                     |
| EPI_ISL_2231647, EPI_ISL_2231763                                                                                                     | AP SSO                                                                                                                                                                                                                                                                                                                                                                                                                                                                                                                                                                                                                                                                                                                                                                           | CSIR-Centre for Cellular and Molecular Biology-INSACOG                                                                                                                                                                                                                                                                                                                   | Carlos Franco-Muñoz; Carmen Osorio; Christian Romero; Diana Malo; Diego A. Álvarez-Díaz; Diego Andrés Prada; Gerardo Santamaría; Hector Alejandro Ruiz-Moreno; Jhonatan Reales-González; Jorge Rivera; Juan Camilo Martínez; Julian Naizacque; Katherine Laiton-Donato; Lisseth Pardo; Magdalena Wiesner; Marcela Mercado-Reyes; María T. Herrera-Sepúlveda; Marta Lopez Blanco; Martha Lucia Ospina Martinez; Paola Rojas; Patricia del Portillo; Sergio Gomez; Sheryl Corchuelo; Ángela Alarcon Cruz                                                                                                                                                                                                                                                                                                                                                                                                                                                                                                                                                                  |
| EPI_ISL_2018205                                                                                                                      | AR Dept. of Health-PHL, Molecular Diagnostics                                                                                                                                                                                                                                                                                                                                                                                                                                                                                                                                                                                                                                                                                                                                    | Centers for Disease Control and Prevention Division of Viral Diseases, Pathogen Discovery                                                                                                                                                                                                                                                                                | Amareshwar Vodapalli; Ara Sreenivas; Archana Bharadwaj Siva; B Himasri; Blessy B John; Divya Tej Sowpati; Karthik Bharadwaj Tallapaka; Lamuk Zaveri; Payel Mukherjee; Rakesh K Mishra; Sharath Chandra Thota; Shreekant Verma; Sofia Banu; Tulasi Nagabandi; Valli Nagalakshmi Undamatla; Viswagithe S L                                                                                                                                                                                                                                                                                                                                                                                                                                                                                                                                                                                                                                                                                                                                                                |
| EPI_ISL_1067609                                                                                                                      | AREA DE SALUD ALAJUELA NORTE - CLINICA DR. MARCIAL RODRIGUEZ                                                                                                                                                                                                                                                                                                                                                                                                                                                                                                                                                                                                                                                                                                                     | Incienza, Instituto Costarricense de Investigación y Enseñanza en Nutrición y Salud                                                                                                                                                                                                                                                                                      | Alison Laufer Halpin; Ben L. Rambo-Martin; Clinton R. Paden; Dakota Howard; Darlene Wagner; Dave Wentworth; Dhvani Batra; Jasmine Padilla; Justin Lee; Katie Dillon; Krista Queen; Kristen Knipe; Kristine Lacek; Mark Burroughs; Matthew Schmeer; Mili Sheth; Peter Cook; Sam Shepard; Sarah Nobles; Shoshona Le; Suxiang Tong; Vivien Dugan; Yvette Unoarumhi                                                                                                                                                                                                                                                                                                                                                                                                                                                                                                                                                                                                                                                                                                         |
| EPI_ISL_1379413                                                                                                                      | AREA DE SALUD CORONADO                                                                                                                                                                                                                                                                                                                                                                                                                                                                                                                                                                                                                                                                                                                                                           | Incienza, Instituto Costarricense de Investigación y Enseñanza en Nutrición y Salud                                                                                                                                                                                                                                                                                      | Adriana Godínez; Claudio Soto-Garita; Estela Cordero; Francisco Duarte; Hebleen Porras; Melany Calderón & Mariel López                                                                                                                                                                                                                                                                                                                                                                                                                                                                                                                                                                                                                                                                                                                                                                                                                                                                                                                                                  |
| EPI_ISL_2103409                                                                                                                      | AREA DE SALUD FORTUNA                                                                                                                                                                                                                                                                                                                                                                                                                                                                                                                                                                                                                                                                                                                                                            | Incienza, Instituto Costarricense de Investigación y Enseñanza en Nutrición y Salud                                                                                                                                                                                                                                                                                      | Adriana Godínez; Caterina Guzmán; Claudio Soto-Garita; Estela Cordero; Francisco Duarte; Hebleen Porras; Joselyn Prado; José Luis Vargas; Mariela Gutiérrez; Melany Calderón; Nazareth Ruiz & Carolina Arrieta Rojas                                                                                                                                                                                                                                                                                                                                                                                                                                                                                                                                                                                                                                                                                                                                                                                                                                                    |
| EPI_ISL_1067591, EPI_ISL_1067603                                                                                                     | AREA DE SALUD GOICOECHEA 2 - CLINICA DR. JIMENEZ NUNEZ                                                                                                                                                                                                                                                                                                                                                                                                                                                                                                                                                                                                                                                                                                                           | Incienza, Instituto Costarricense de Investigación y Enseñanza en Nutrición y Salud                                                                                                                                                                                                                                                                                      | Adriana Godínez; Claudio Soto-Garita; Estela Cordero; Francisco Duarte; Hebleen Porras; Melany Calderón & Mariel López                                                                                                                                                                                                                                                                                                                                                                                                                                                                                                                                                                                                                                                                                                                                                                                                                                                                                                                                                  |
| EPI_ISL_2103389                                                                                                                      | AREA DE SALUD OROTINA-SAN MATEO                                                                                                                                                                                                                                                                                                                                                                                                                                                                                                                                                                                                                                                                                                                                                  | Incienza, Instituto Costarricense de Investigación y Enseñanza en Nutrición y Salud                                                                                                                                                                                                                                                                                      | Adriana Godínez; Caterina Guzmán; Claudio Soto-Garita; Estela Cordero; Francisco Duarte; Hebleen Porras; Joselyn Prado; José Luis Vargas; Mariela Gutiérrez; Melany Calderón; Nazareth Ruiz & María José Gómez-Umaña                                                                                                                                                                                                                                                                                                                                                                                                                                                                                                                                                                                                                                                                                                                                                                                                                                                    |
| EPI_ISL_914835                                                                                                                       | AREA DE SALUD PARAISO-CERVANTES                                                                                                                                                                                                                                                                                                                                                                                                                                                                                                                                                                                                                                                                                                                                                  | Incienza, Instituto Costarricense de Investigación y Enseñanza                                                                                                                                                                                                                                                                                                           | Adriana Godínez; Claudio Soto-Garita; Estela Cordero; Francisco Duarte; Hebleen Porras; Melany Calderón & Mariel López                                                                                                                                                                                                                                                                                                                                                                                                                                                                                                                                                                                                                                                                                                                                                                                                                                                                                                                                                  |

|                                                                                                                                                                                                                                                                                                                                                                                                                                                                                                                                                                                                                                                                                                                                                                                                                                                                                                                                                                                        |                                                                                                     | en Nutrición y Salud                                                                                                              |                                                                                                                                                                                                                                                                                                                                                                                                                                                                                                                                                                                                                                                                                                                                                                                                                                                                                                                                                                                                                                                                                                                                                                                                                                                                                                                                                                                                                                                                                                                                                                                            |  |  |
|----------------------------------------------------------------------------------------------------------------------------------------------------------------------------------------------------------------------------------------------------------------------------------------------------------------------------------------------------------------------------------------------------------------------------------------------------------------------------------------------------------------------------------------------------------------------------------------------------------------------------------------------------------------------------------------------------------------------------------------------------------------------------------------------------------------------------------------------------------------------------------------------------------------------------------------------------------------------------------------|-----------------------------------------------------------------------------------------------------|-----------------------------------------------------------------------------------------------------------------------------------|--------------------------------------------------------------------------------------------------------------------------------------------------------------------------------------------------------------------------------------------------------------------------------------------------------------------------------------------------------------------------------------------------------------------------------------------------------------------------------------------------------------------------------------------------------------------------------------------------------------------------------------------------------------------------------------------------------------------------------------------------------------------------------------------------------------------------------------------------------------------------------------------------------------------------------------------------------------------------------------------------------------------------------------------------------------------------------------------------------------------------------------------------------------------------------------------------------------------------------------------------------------------------------------------------------------------------------------------------------------------------------------------------------------------------------------------------------------------------------------------------------------------------------------------------------------------------------------------|--|--|
| EPI_ISL_914810, EPI_ISL_1712397                                                                                                                                                                                                                                                                                                                                                                                                                                                                                                                                                                                                                                                                                                                                                                                                                                                                                                                                                        | AREA DE SALUD SAN JUAN-SAN DIEGO-CONCEPCION 2                                                       | Incienza, Instituto Costarricense de Investigación y Enseñanza en Nutrición y Salud                                               | Adriana Godínez; Claudio Soto-Garita; Estela Cordero; Francisco Duarte; Hebleen Porras; José Luis Vargas; Mariela Gutiérrez & Joselyn Prado; Melany Calderón; Melany Calderón & Mariel López                                                                                                                                                                                                                                                                                                                                                                                                                                                                                                                                                                                                                                                                                                                                                                                                                                                                                                                                                                                                                                                                                                                                                                                                                                                                                                                                                                                               |  |  |
| EPI_ISL_1067607                                                                                                                                                                                                                                                                                                                                                                                                                                                                                                                                                                                                                                                                                                                                                                                                                                                                                                                                                                        | AREA DE SALUD ZAPOTE-CATEDRAL - CLINICA DR. CARLOS DURAN                                            | Incienza, Instituto Costarricense de Investigación y Enseñanza en Nutrición y Salud                                               | Adriana Godínez; Caterina Guzmán; Claudio Soto-Garita; Estela Cordero; Francisco Duarte; Hebleen Porras; Melany Calderón; Nazareth Ruiz & Nicole Vargas-Viquez                                                                                                                                                                                                                                                                                                                                                                                                                                                                                                                                                                                                                                                                                                                                                                                                                                                                                                                                                                                                                                                                                                                                                                                                                                                                                                                                                                                                                             |  |  |
| EPI_ISL_1811231, EPI_ISL_1811240                                                                                                                                                                                                                                                                                                                                                                                                                                                                                                                                                                                                                                                                                                                                                                                                                                                                                                                                                       | AS Alajuela Central                                                                                 | Incienza, Instituto Costarricense de Investigación y Enseñanza en Nutrición y Salud                                               | Pérez-Corrales C; Pérez-Corrales C & Zuñiga-Carvajal P                                                                                                                                                                                                                                                                                                                                                                                                                                                                                                                                                                                                                                                                                                                                                                                                                                                                                                                                                                                                                                                                                                                                                                                                                                                                                                                                                                                                                                                                                                                                     |  |  |
| EPI_ISL_1082482, EPI_ISL_1157926, EPI_ISL_1557296                                                                                                                                                                                                                                                                                                                                                                                                                                                                                                                                                                                                                                                                                                                                                                                                                                                                                                                                      | ASL Napoli 1 Centro                                                                                 | AMES Centro Polidiagnostico Strumentale S.r.l.                                                                                    | "Giovanni Savarese; Antonella Di Carlo; Antonio Fico"; Eloisa Evangelista; Luigi D'Amore; Luisa Circelli; Maurizio D'Amora; Monica Ianniello; Nadia Petrillo; Raffaella Ruggiero; Roberto Sirica                                                                                                                                                                                                                                                                                                                                                                                                                                                                                                                                                                                                                                                                                                                                                                                                                                                                                                                                                                                                                                                                                                                                                                                                                                                                                                                                                                                           |  |  |
| EPI_ISL_2036149                                                                                                                                                                                                                                                                                                                                                                                                                                                                                                                                                                                                                                                                                                                                                                                                                                                                                                                                                                        | AZDelta                                                                                             | AZ Delta Medical Laboratories in Roeselare, Belgium                                                                               | Dieter De Smet; Geert Martens; Merijn Vanhee; on behalf of AZ Delta COVID-19 Genomics core (member of Genomic surveillance of SARS-CoV-2 in Belgium network)                                                                                                                                                                                                                                                                                                                                                                                                                                                                                                                                                                                                                                                                                                                                                                                                                                                                                                                                                                                                                                                                                                                                                                                                                                                                                                                                                                                                                               |  |  |
| EPI_ISL_954768                                                                                                                                                                                                                                                                                                                                                                                                                                                                                                                                                                                                                                                                                                                                                                                                                                                                                                                                                                         | AZDelta                                                                                             | AZDelta                                                                                                                           | Dieter De Smet; Geert Martens                                                                                                                                                                                                                                                                                                                                                                                                                                                                                                                                                                                                                                                                                                                                                                                                                                                                                                                                                                                                                                                                                                                                                                                                                                                                                                                                                                                                                                                                                                                                                              |  |  |
| EPI_ISL_517616, EPI_ISL_517632, EPI_ISL_517661, EPI_ISL_517662, EPI_ISL_518800, EPI_ISL_518806, EPI_ISL_518810, EPI_ISL_518815, EPI_ISL_518816                                                                                                                                                                                                                                                                                                                                                                                                                                                                                                                                                                                                                                                                                                                                                                                                                                         |                                                                                                     |                                                                                                                                   |                                                                                                                                                                                                                                                                                                                                                                                                                                                                                                                                                                                                                                                                                                                                                                                                                                                                                                                                                                                                                                                                                                                                                                                                                                                                                                                                                                                                                                                                                                                                                                                            |  |  |
| see above                                                                                                                                                                                                                                                                                                                                                                                                                                                                                                                                                                                                                                                                                                                                                                                                                                                                                                                                                                              | Academic Hospital Paramaribo                                                                        | Erasmus Medical Center                                                                                                            | Bas Oude Munnink; Dion Gajadin; Ed Ijzerman; Emmanuelle Munger; Gary Gummels; Ingrid Krishnadath; Lycke Woittiez; Marion Koopmans; Mireille Van de Veer; Princes Wongsowidjojo; Radjesh Ori; Rohma Banwari; Stephen Vredon                                                                                                                                                                                                                                                                                                                                                                                                                                                                                                                                                                                                                                                                                                                                                                                                                                                                                                                                                                                                                                                                                                                                                                                                                                                                                                                                                                 |  |  |
| EPI_ISL_1551429, EPI_ISL_1561118, EPI_ISL_1650602, EPI_ISL_1685645, EPI_ISL_1687059, EPI_ISL_1688103, EPI_ISL_1689585, EPI_ISL_1736540, EPI_ISL_1834470, EPI_ISL_1834711, EPI_ISL_1837008, EPI_ISL_1837430, EPI_ISL_1837997, EPI_ISL_1923107, EPI_ISL_1925232, EPI_ISL_1925608, EPI_ISL_1996234, EPI_ISL_2039068, EPI_ISL_2040139, EPI_ISL_2042271, EPI_ISL_2089897, EPI_ISL_2146580, EPI_ISL_2146655, EPI_ISL_2146674, EPI_ISL_2146965, EPI_ISL_2147128, EPI_ISL_2147197, EPI_ISL_2148450, EPI_ISL_2148519, EPI_ISL_2148849, EPI_ISL_2149473, EPI_ISL_2149477, EPI_ISL_2150843, EPI_ISL_2150846, EPI_ISL_2158903, EPI_ISL_2159134, EPI_ISL_2159366, EPI_ISL_2159384, EPI_ISL_2180626, EPI_ISL_2181154, EPI_ISL_2181219, EPI_ISL_2181369, EPI_ISL_2181371, EPI_ISL_2181444, EPI_ISL_2181457, EPI_ISL_2187454, EPI_ISL_2202095, EPI_ISL_2203190, EPI_ISL_2204535, EPI_ISL_2204920, EPI_ISL_2241802, EPI_ISL_2242160, EPI_ISL_2242578, EPI_ISL_2242753, EPI_ISL_2243532, EPI_ISL_2243598 |                                                                                                     |                                                                                                                                   |                                                                                                                                                                                                                                                                                                                                                                                                                                                                                                                                                                                                                                                                                                                                                                                                                                                                                                                                                                                                                                                                                                                                                                                                                                                                                                                                                                                                                                                                                                                                                                                            |  |  |
| see above                                                                                                                                                                                                                                                                                                                                                                                                                                                                                                                                                                                                                                                                                                                                                                                                                                                                                                                                                                              | Aegis Sciences Corporation                                                                          | Centers for Disease Control and Prevention Division of Viral Diseases, Pathogen Discovery                                         | Adrian Paskey; Alec Vest; Benjamin Rambo-Martin; Christopher Gulvick; Clinton R. Paden; Cyndi Clark; Dakota Howard; Darlene Wagner; Dhvani Batra; Dillon Nall; Duncan MacCannell; Ethan Sanders; Holly Houdeshell; Jason Caravas; Kara Moser; Matthew Hardison; Matthew Scherer; Ola Kvalvaag; Patrick Campbell; Peter W. Cook; Rob Case; Scott Sammons; Shatavia Morrison; Shaun Westlund; Vikramsinh Ghorpade; Yvette Unoarumhi                                                                                                                                                                                                                                                                                                                                                                                                                                                                                                                                                                                                                                                                                                                                                                                                                                                                                                                                                                                                                                                                                                                                                          |  |  |
| EPI_ISL_1251848, EPI_ISL_1251885                                                                                                                                                                                                                                                                                                                                                                                                                                                                                                                                                                                                                                                                                                                                                                                                                                                                                                                                                       | Akershus University Hospital, Department of Microbiology and Infectious Disease Control             | Norwegian Institute of Public Health, Department of Virology                                                                      | Atiya R Ali; Debech Nadia; Engebretsen Serina Beate; Garcia Llorente Ignacio; Hilde Elshaug; Hilde Vollan; Jon Bråte; Kamilla Heddeland Instefjord; Karoline Bragstad; Kathrine Stene-Johansen; Marie Paulsen Madsen; Olav Hungnes; Pedersen Benedikte Nevjen; Rasmus Riis Kopperud                                                                                                                                                                                                                                                                                                                                                                                                                                                                                                                                                                                                                                                                                                                                                                                                                                                                                                                                                                                                                                                                                                                                                                                                                                                                                                        |  |  |
| EPI_ISL_1039730, EPI_ISL_1483652, EPI_ISL_1483663, EPI_ISL_1621185, EPI_ISL_1652201, EPI_ISL_1920981, EPI_ISL_2213203                                                                                                                                                                                                                                                                                                                                                                                                                                                                                                                                                                                                                                                                                                                                                                                                                                                                  |                                                                                                     |                                                                                                                                   |                                                                                                                                                                                                                                                                                                                                                                                                                                                                                                                                                                                                                                                                                                                                                                                                                                                                                                                                                                                                                                                                                                                                                                                                                                                                                                                                                                                                                                                                                                                                                                                            |  |  |
| see above                                                                                                                                                                                                                                                                                                                                                                                                                                                                                                                                                                                                                                                                                                                                                                                                                                                                                                                                                                              | Alaska State Virology Laboratory                                                                    | Alaska State Virology Laboratory                                                                                                  | Elva House; Jack Chen; Jacob Zidek; Lisa Smith; Ph.D.; Stephanie DeRonde                                                                                                                                                                                                                                                                                                                                                                                                                                                                                                                                                                                                                                                                                                                                                                                                                                                                                                                                                                                                                                                                                                                                                                                                                                                                                                                                                                                                                                                                                                                   |  |  |
| EPI_ISL_2163314, EPI_ISL_2163518, EPI_ISL_2166331                                                                                                                                                                                                                                                                                                                                                                                                                                                                                                                                                                                                                                                                                                                                                                                                                                                                                                                                      | Alberta Precision Labs (APL)                                                                        | Public Health Agency of Canada (PHAC) National Microbiology Laboratory                                                            | Buss; Croxen M; Deo A; Dieu P; E; Ferrato C; Gill K; Khan F; Koleva P; Li V; Lloyd C; Lynch T; Ma R; Murphy S; Pabbaraju K; Shokoples S; Thayer J; Tipples G; Whitehouse M; Wong A; Yu C; Zelyas N                                                                                                                                                                                                                                                                                                                                                                                                                                                                                                                                                                                                                                                                                                                                                                                                                                                                                                                                                                                                                                                                                                                                                                                                                                                                                                                                                                                         |  |  |
| EPI_ISL_1385807, EPI_ISL_1385811                                                                                                                                                                                                                                                                                                                                                                                                                                                                                                                                                                                                                                                                                                                                                                                                                                                                                                                                                       | Alfa Diagnostica LLC                                                                                | ONCOGENE LLC                                                                                                                      | ONCOGENE LLC                                                                                                                                                                                                                                                                                                                                                                                                                                                                                                                                                                                                                                                                                                                                                                                                                                                                                                                                                                                                                                                                                                                                                                                                                                                                                                                                                                                                                                                                                                                                                                               |  |  |
| EPI_ISL_1966326                                                                                                                                                                                                                                                                                                                                                                                                                                                                                                                                                                                                                                                                                                                                                                                                                                                                                                                                                                        | Ambulatorio IB                                                                                      | Instituto Butantan / Mendelics                                                                                                    | Antonio Jorge Martins; Bianca Cechetto Carlos. Mendelics; Bibiana Santos; Claudia Renata dos Santos Barros; Cíntia Bittar; David Schlesinger. Hemocentro Ribeirão Preto; Simone Kashima; Debora Botequiao Moretti; Elaine Vieira dos Santos; Elisangela Chicaroni Mattos; Erika Freitas; Evandra Strazza Rodrigues; Felipe Allan da Silva da Costa; Flavia Aburjaile; Fábio Sossai Possebon; Guilherme Campos; Guilherme Targino Valente; Heidge Fukumasu. USP-Botucatu; Rejane Maria Tommasini Grotto; Helena Lage Ferreira; Instituto Butantan: Dimas Tadeu Covas; Jardelina de Souza Todao Bernardino; Jayme A. Souza-Neto; Jessica Cristina Chagas Lesbon; Jorge A. Petrolí Marchesi; José Salvatore Leister Patané; João Paulo Kitajima; João Pessoa Araújo Jr.; Leila Sabrina Ullmann; Loyze Paola Oliveira de Lima; Luiz Aurelio de Campos Crispin. Centro de Genômica Funcional da ESALQ: Luiz Lehmann Coutinho; Luiz Carlos Junior de Alcantara; Lívia Sacchetto; Maisa C. Pereira Parra; Maria Carolina Elias; Marta Giovanetti; Marília Moraes; Maurício Lacerda Nogueira. Prefeitura de Sao Paulo: Melissa Palmieri.; Patricia Akemi Assato; Paula Rahal; Paulo Inacio da Costa; Rafael dos Santos Bezerra; Raquel de Lello Rocha Campos Cassano. NGS Soluções Genômicas: Pilar Drummond Sampaio Corrêa Mariani. FZEA-USP Pirassununga: Mirele Daiana Poleti; Raul Machado Neto; Ricardo Augusto Brassaloti; Ricardo Haddad; Rodrigo Tocantins Calado. FAMERP-SJRP: Cecília Artico Banho; Sandra Coccuzzo Sampaio; Svetoslav Nanev Slavov; Wagner Fonseca; Vincent Louis Viala |  |  |
| EPI_ISL_955314                                                                                                                                                                                                                                                                                                                                                                                                                                                                                                                                                                                                                                                                                                                                                                                                                                                                                                                                                                         | American Esoteric Laboratory                                                                        | Pathogen Discovery, Respiratory Viruses Branch, Division of Viral Diseases, Centers for Disease Control and Prevention            | Anna Uehara; Clinton R. Paden; Haibin Wang; Jing Zhang; Krista Queen; Peter Cook; Suxiang Tong; Yan Li; Ying Tao                                                                                                                                                                                                                                                                                                                                                                                                                                                                                                                                                                                                                                                                                                                                                                                                                                                                                                                                                                                                                                                                                                                                                                                                                                                                                                                                                                                                                                                                           |  |  |
| EPI_ISL_2156552                                                                                                                                                                                                                                                                                                                                                                                                                                                                                                                                                                                                                                                                                                                                                                                                                                                                                                                                                                        | Amosup Seamen's Hospital                                                                            | Philippine Genome Center                                                                                                          | Alethea R. de Guzman; Anna Ong-Lim; Arianne A. Zamora; Asia Louisa U. Chong; Benedict A. Maralit; Candice Francheska B. Tambaoan; Carlo M. Lapid; Celia Carlos; Devon Ray Pacial; Edsel Maurice Salvaña; El King D. Morado; Elcid Aaron R. Pangilinan; Eva Maria Cutiongo-de la Paz; Francis A. Tablizo; Irish Coleen A. Asin; Jaime C. Montoya; Jan Michael C. Yap; Jo-Hannah S. Llamas; John Q. Wong; Joshua Gregor A. Dizon; Juan Antonio R. Magalang; Karol Sophia Agape R. Padilla; Kenneth M. Kim; Kris P. Punayan; Marc Edsel C. Ayes; Marc Jerrone R. Castro; Maria Rosario Singh-Vergeire and Cynthia P. Saloma; Maria Sofia L. Yangzon; Marissa Alejandria; Razel Nikka M. Hao; Rianna Patricia S. Cruz; Sheila Mae M. Araiza                                                                                                                                                                                                                                                                                                                                                                                                                                                                                                                                                                                                                                                                                                                                                                                                                                                    |  |  |
| EPI_ISL_2178785                                                                                                                                                                                                                                                                                                                                                                                                                                                                                                                                                                                                                                                                                                                                                                                                                                                                                                                                                                        | Ampath Laboratories                                                                                 | National Institute for Communicable Diseases of the National Health Laboratory Service                                            | Amoako DG; Bhiman JN; Glass A; Gottberg A; Mahlangu B; Marshall T; Mohale T; Ntuli N; Scheepers C; Viana R                                                                                                                                                                                                                                                                                                                                                                                                                                                                                                                                                                                                                                                                                                                                                                                                                                                                                                                                                                                                                                                                                                                                                                                                                                                                                                                                                                                                                                                                                 |  |  |
| EPI_ISL_770008                                                                                                                                                                                                                                                                                                                                                                                                                                                                                                                                                                                                                                                                                                                                                                                                                                                                                                                                                                         | Area De Salud Corredores                                                                            | Incienza, Instituto Costarricense de Investigación y Enseñanza en Nutrición y Salud                                               | Adriana Godínez; Claudio Soto-Garita; Estela Cordero; Francisco Duarte; Hebleen Porras; Melany Calderón & Mariel López                                                                                                                                                                                                                                                                                                                                                                                                                                                                                                                                                                                                                                                                                                                                                                                                                                                                                                                                                                                                                                                                                                                                                                                                                                                                                                                                                                                                                                                                     |  |  |
| EPI_ISL_770003                                                                                                                                                                                                                                                                                                                                                                                                                                                                                                                                                                                                                                                                                                                                                                                                                                                                                                                                                                         | Area De Salud La Cruz                                                                               | Incienza, Instituto Costarricense de Investigación y Enseñanza en Nutrición y Salud                                               | Adriana Godínez; Claudio Soto-Garita; Estela Cordero; Francisco Duarte; Hebleen Porras; Melany Calderón & Mariel López                                                                                                                                                                                                                                                                                                                                                                                                                                                                                                                                                                                                                                                                                                                                                                                                                                                                                                                                                                                                                                                                                                                                                                                                                                                                                                                                                                                                                                                                     |  |  |
| EPI_ISL_512658                                                                                                                                                                                                                                                                                                                                                                                                                                                                                                                                                                                                                                                                                                                                                                                                                                                                                                                                                                         | Area De Salud Orotina-San Mateo [Orotina/Alajuela]                                                  | Incienza, Instituto Costarricense de Investigación y Enseñanza en Nutrición y Salud                                               | Adriana Godínez & Melany Calderon; Claudio Soto-Garita; Estela Cordero; Francisco Duarte; Hebleen Porras                                                                                                                                                                                                                                                                                                                                                                                                                                                                                                                                                                                                                                                                                                                                                                                                                                                                                                                                                                                                                                                                                                                                                                                                                                                                                                                                                                                                                                                                                   |  |  |
| EPI_ISL_1010705                                                                                                                                                                                                                                                                                                                                                                                                                                                                                                                                                                                                                                                                                                                                                                                                                                                                                                                                                                        | Area of Virology, Serology and Virology Division (SAVID), New South Wales Health Pathology Randwick | Microbiology RPAH                                                                                                                 | Au, J.; Bull, R.; Deveson, I.; Foster, C.; Rawlinson, W.; Ruiz Silva, M.; Van Hal, S.                                                                                                                                                                                                                                                                                                                                                                                                                                                                                                                                                                                                                                                                                                                                                                                                                                                                                                                                                                                                                                                                                                                                                                                                                                                                                                                                                                                                                                                                                                      |  |  |
| EPI_ISL_678369, EPI_ISL_678377, EPI_ISL_1121031, EPI_ISL_1121975, EPI_ISL_1293047, EPI_ISL_1615596, EPI_ISL_1633351, EPI_ISL_1911180, EPI_ISL_1911184                                                                                                                                                                                                                                                                                                                                                                                                                                                                                                                                                                                                                                                                                                                                                                                                                                  |                                                                                                     |                                                                                                                                   |                                                                                                                                                                                                                                                                                                                                                                                                                                                                                                                                                                                                                                                                                                                                                                                                                                                                                                                                                                                                                                                                                                                                                                                                                                                                                                                                                                                                                                                                                                                                                                                            |  |  |
| see above                                                                                                                                                                                                                                                                                                                                                                                                                                                                                                                                                                                                                                                                                                                                                                                                                                                                                                                                                                              | Area of Virology, Serology and Virology Division (SAVID), New South Wales Health Pathology Randwick | Virology Research Laboratory; Area of Virology, Serology and Virology Division (SAVID), New South Wales Health Pathology Randwick | Au, J.; Bull, R.; Deveson, I.; Foster, C.; Rawlinson, W.; Ruiz Silva, M.; Van Hal, S.                                                                                                                                                                                                                                                                                                                                                                                                                                                                                                                                                                                                                                                                                                                                                                                                                                                                                                                                                                                                                                                                                                                                                                                                                                                                                                                                                                                                                                                                                                      |  |  |
| EPI_ISL_1270222                                                                                                                                                                                                                                                                                                                                                                                                                                                                                                                                                                                                                                                                                                                                                                                                                                                                                                                                                                        | Arizona State Public Health Laboratory                                                              | Arizona State Public Health Laboratory                                                                                            | Jessica Escobar; Katherine Fullerton; Linda Getsinger; Nobuko Fukushima; Stacy White; Trung Huynh; Victor Waddell                                                                                                                                                                                                                                                                                                                                                                                                                                                                                                                                                                                                                                                                                                                                                                                                                                                                                                                                                                                                                                                                                                                                                                                                                                                                                                                                                                                                                                                                          |  |  |
| EPI_ISL_1405918, EPI_ISL_1592275                                                                                                                                                                                                                                                                                                                                                                                                                                                                                                                                                                                                                                                                                                                                                                                                                                                                                                                                                       | Arizona State University                                                                            | Arizona State University                                                                                                          | Efrem S. Lim; Emily A. Kaelin; Joshua LaBaer; Joy M. Blain; Kristina Buss; LaRinda A. Holland; Neal W Woodbury; Nicholas J. Mellor; Peter T. Skidmore; Rabia Maqsood; Valerie Harris; Vel Murugan                                                                                                                                                                                                                                                                                                                                                                                                                                                                                                                                                                                                                                                                                                                                                                                                                                                                                                                                                                                                                                                                                                                                                                                                                                                                                                                                                                                          |  |  |
| EPI_ISL_2156772, EPI_ISL_2156791                                                                                                                                                                                                                                                                                                                                                                                                                                                                                                                                                                                                                                                                                                                                                                                                                                                                                                                                                       | Arkansas Children's Hospital                                                                        | Center for Global Health, University of New Mexico Health Sciences Center                                                         | Bobby Boyanton; Catherine Kirkpatrick; Darrell Dinwiddie; Daryl Domman; Joshua L. Kennedy; Kurt Schwalm; Valerie Morley                                                                                                                                                                                                                                                                                                                                                                                                                                                                                                                                                                                                                                                                                                                                                                                                                                                                                                                                                                                                                                                                                                                                                                                                                                                                                                                                                                                                                                                                    |  |  |
| EPI_ISL_2154047                                                                                                                                                                                                                                                                                                                                                                                                                                                                                                                                                                                                                                                                                                                                                                                                                                                                                                                                                                        | Army General Hospital Molecular Laboratory                                                          | Philippine Genome Center                                                                                                          | Alethea R. de Guzman; Anna Ong-Lim; Arianne A. Zamora; Asia Louisa U. Chong; Benedict A. Maralit; Candice Francheska B. Tambaoan; Carlo M. Lapid; Celia Carlos; Devon Ray Pacial; Edsel Maurice Salvaña; El King D. Morado; Elcid Aaron R. Pangilinan; Eva Maria Cutiongo-de la Paz; Francis A. Tablizo; Irish Coleen A. Asin; Jaime C. Montoya; Jan Michael C. Yap; Jo-Hannah S. Llamas; John Q. Wong; Joshua Gregor A. Dizon; Juan Antonio R. Magalang; Karol Sophia Agape R. Padilla; Kenneth M. Kim; Kris P. Punayan; Marc Edsel C. Ayes; Marc Jerrone R. Castro; Maria Rosario Singh-Vergeire and Cynthia P. Saloma; Maria Sofia L. Yangzon; Marissa Alejandria; Razel Nikka M. Hao; Rianna Patricia S. Cruz; Sheila Mae M. Araiza                                                                                                                                                                                                                                                                                                                                                                                                                                                                                                                                                                                                                                                                                                                                                                                                                                                    |  |  |
| EPI_ISL_1533455, EPI_ISL_1533488                                                                                                                                                                                                                                                                                                                                                                                                                                                                                                                                                                                                                                                                                                                                                                                                                                                                                                                                                       | Atlanta VA Medical Center                                                                           | Genomics and Discovery, Respiratory Viruses Branch, Division of Viral Diseases, Centers for Disease Control and                   | Adam Retchless; Anna Kelleher; Anna Montmayeur; Anna Uehara; Brian Lynch; Clinton R. Paden; Haibin Wang; Han Jia Justin Ng; Jing Zhang; Justin Lee; Krista Queen; Mark Burroughs; Peter Cook; Rachel Marine; Suxiang Tong; Yan Li; Ying Tao                                                                                                                                                                                                                                                                                                                                                                                                                                                                                                                                                                                                                                                                                                                                                                                                                                                                                                                                                                                                                                                                                                                                                                                                                                                                                                                                                |  |  |

| Prevention                                                                                                                                                                                                                                                                                                                                      |                                                                                                                             |                                                                                                                                            |                                                                                                                                                                                                                                                                                                                                                                                                                                                                                                                                                                                                                                                                                                                                         |
|-------------------------------------------------------------------------------------------------------------------------------------------------------------------------------------------------------------------------------------------------------------------------------------------------------------------------------------------------|-----------------------------------------------------------------------------------------------------------------------------|--------------------------------------------------------------------------------------------------------------------------------------------|-----------------------------------------------------------------------------------------------------------------------------------------------------------------------------------------------------------------------------------------------------------------------------------------------------------------------------------------------------------------------------------------------------------------------------------------------------------------------------------------------------------------------------------------------------------------------------------------------------------------------------------------------------------------------------------------------------------------------------------------|
| EPI_ISL_413490                                                                                                                                                                                                                                                                                                                                  | Auckland Hospital                                                                                                           | Institute of Environmental Science and Research (ESR)                                                                                      | Erasmus Smit; Gary McAuliffe; Joep de Ligt; Lauren Jelly; Matt Storey; Matthew Blakiston; Sally Roberts; Xiaoyun Ren                                                                                                                                                                                                                                                                                                                                                                                                                                                                                                                                                                                                                    |
| EPI_ISL_544967                                                                                                                                                                                                                                                                                                                                  | Australian Clinical Labs                                                                                                    | NSW Health Pathology - Institute of Clinical Pathology and Medical Research; Westmead Hospital; University of Sydney                       | CIDM-PH et al.                                                                                                                                                                                                                                                                                                                                                                                                                                                                                                                                                                                                                                                                                                                          |
| EPI_ISL_1827951                                                                                                                                                                                                                                                                                                                                 | Australian Infectious Disease Research Centre, School of Chemistry and Molecular Biosciences, The University of Queensland  | Australian Infectious Disease Research Centre, School of Chemistry and Molecular Biosciences, The University of Queensland                 | Parry; R.H. and Khromykh, A.                                                                                                                                                                                                                                                                                                                                                                                                                                                                                                                                                                                                                                                                                                            |
| EPI_ISL_853997, EPI_ISL_854190, EPI_ISL_1008050, EPI_ISL_1180819, EPI_ISL_1180821, EPI_ISL_1671035, EPI_ISL_2232789                                                                                                                                                                                                                             | see above                                                                                                                   | Austrian Agency for Health and Food Safety (AGES)                                                                                          | Berghaler laboratory, CeMM Research Center for Molecular Medicine of the Austrian Academy of Sciences                                                                                                                                                                                                                                                                                                                                                                                                                                                                                                                                                                                                                                   |
| EPI_ISL_2235486                                                                                                                                                                                                                                                                                                                                 | Azienda USL Umbria 3                                                                                                        | Istituto Zooprofilattico Sperimentale dell'Abruzzo e Molise "G. Caporale"                                                                  | Ancora M; Calistri P; Cammà C; Caporale M; Curini V; Delli Compagni E; Di Domenico M; Di Lollo Valeria; Di Pasquale A; Lorusso A; Mangone I; Marcacci M; Pistoni E; Proietti A; Puglia I; Rinaldi A; Savini G; Scialabba S                                                                                                                                                                                                                                                                                                                                                                                                                                                                                                              |
| EPI_ISL_2226648                                                                                                                                                                                                                                                                                                                                 | BBTKLPP Surabaya                                                                                                            | Institute of Tropical Disease, Universitas Airlangga                                                                                       | Acub Zaenal; Aldise M Nastri; Gatot Soegiarto; Jezy R Dewantari; Kazufumi Shimizu; Krisnoadi Rahardjo; Laksmi Wulandari; Maria I Lusida; Resti Yudhawati; Rima R Prasetya; Rosidi Roslan; Soetjipto; Yasuko Mori; Zahrotunnisa                                                                                                                                                                                                                                                                                                                                                                                                                                                                                                          |
| EPI_ISL_418858, EPI_ISL_982299                                                                                                                                                                                                                                                                                                                  | BCCDC Public Health Laboratory                                                                                              | BCCDC Public Health Laboratory                                                                                                             | Ana Pacagnella; Choi; Corrinne Ng; Dan Fornika; Gilmour; Harrigan; Hoang; John Tyson; Kamelian; Kim Macdonald; Kimia Kamelian; Krajden; Lapointe; Lee; Levett; Li; Loman; Loretta Janz; Mel Krajden; Prystajecy; Prystajecy Natalie; Quick; Robert Azana; Sekirov; Shannon Russell; Snutch; Tyson                                                                                                                                                                                                                                                                                                                                                                                                                                       |
| EPI_ISL_1201850                                                                                                                                                                                                                                                                                                                                 | BIOMNIS LYON                                                                                                                | CNR Virus des Infections Respiratoires - France SUD                                                                                        | Antonin Bal; Bruno Lina; Gregory Destras; Gwendolyne Burfin; Hadrien Regue; Laurence Josset; Martine Valette; Quentin Semanas                                                                                                                                                                                                                                                                                                                                                                                                                                                                                                                                                                                                           |
| EPI_ISL_1219165, EPI_ISL_1219441, EPI_ISL_2141710                                                                                                                                                                                                                                                                                               | BIOR                                                                                                                        | Latvian Biomedical Research and Study Centre                                                                                               | Daina Pule; Davids Fridmanis; Elina Dimina; Guntars Zarins; Irena Meistere; Ivars Silamikelis; Janis Klovinis; Janis Pjalkovskis; Juris Perevoscikovs; Kaspars Megnis; Laila Silamikele; Lauma Freimane; Laura Ansonie; Liga Birzniece; Monta Ustinova; Nikita Zrelovs; Uga Dumpis; Una Krumina; Vita Rovite                                                                                                                                                                                                                                                                                                                                                                                                                            |
| EPI_ISL_859616, EPI_ISL_859726, EPI_ISL_859742, EPI_ISL_859885, EPI_ISL_859904, EPI_ISL_860052                                                                                                                                                                                                                                                  | BTC, Khalifa University                                                                                                     | BTC, Khalifa University                                                                                                                    | Al Safar et al                                                                                                                                                                                                                                                                                                                                                                                                                                                                                                                                                                                                                                                                                                                          |
| EPI_ISL_2156604                                                                                                                                                                                                                                                                                                                                 | Baguio General Hospital Medical Center (BGHMC)                                                                              | Philippine Genome Center                                                                                                                   | Alethea R. de Guzman; Anna Ong-Lim; Arianne A. Zamora; Asia Louisa U. Chong; Benedict A. Maralit; Candice Francheska B. Tambaoan; Carlo M. Lapid; Celia Carlos; Devon Ray Pacial; Edsel Maurice Salvaña; El King D. Morado; Elcid Aaron R. Panglinan; Eva Maria Cutiongco-de la Paz; Francis A. Tablizo; Irish Coleen A. Asin; Jaime C. Montoya; Jan Michael C. Yap; Jo-Hannah S. Llamas; John Q. Wong; Joshua Gregor A. Dizon; Juan Antonio R. Magalang; Karol Sophia Agape R. Padilla; Kenneth M. Kim; Kris P. Punayan; Marc Edsel C. Ayes; Marc Jerrome R. Castro; Maria Rosario Singh-Vergeire and Cynthia P. Saloma; Maria Sofia L. Yangzon; Marissa Alejandria; Razel Nikka M. Hao; Rianna Patricia S. Cruz; Sheila Mae M. Araiza |
| EPI_ISL_1159375                                                                                                                                                                                                                                                                                                                                 | Bahman Hospital                                                                                                             | Laboratory of Molecular Biology and Cancer Immunology, Lebanese University Public Health England                                           | Fadi Abdel Sater; Steven Pullan                                                                                                                                                                                                                                                                                                                                                                                                                                                                                                                                                                                                                                                                                                         |
| EPI_ISL_833333                                                                                                                                                                                                                                                                                                                                  | Batangas City Health Office                                                                                                 | Research Institute for Tropical Medicine                                                                                                   | Catalino Demetria; Daria Manalo; Edelwisa Mercado; Francisco Gerardo Polotan; Hannah Leah Morito; Inez Andrea Medado; John Leonard Chan; Kirstyn Brunker; Ma Angelica Tujan; Othoniel Jan Onza                                                                                                                                                                                                                                                                                                                                                                                                                                                                                                                                          |
| EPI_ISL_1144017                                                                                                                                                                                                                                                                                                                                 | Bayerisches Landesamt für Gesundheit und Lebensmittelsicherheit (LGL)                                                       | Robert Koch Institute                                                                                                                      |                                                                                                                                                                                                                                                                                                                                                                                                                                                                                                                                                                                                                                                                                                                                         |
| EPI_ISL_509711                                                                                                                                                                                                                                                                                                                                  | Belize Ministry of Health                                                                                                   | Pathogen Discovery, Respiratory Viruses Branch, Division of Viral Diseases, Centers for Disease Control and Prevention                     | Anna Uehara; Clinton Paden; Haibin Wang; Jing Zhang; Krista Queen; Suxiang Tong; Yan Li; Ying Tao                                                                                                                                                                                                                                                                                                                                                                                                                                                                                                                                                                                                                                       |
| EPI_ISL_430843                                                                                                                                                                                                                                                                                                                                  | Bethany Hospital                                                                                                            | Research Institute for Tropical Medicine                                                                                                   | Bautista; Brunker, K.; C.S.; C.T.; D.L.; Demetria; E.S.; F.G.M.; I.A.P.; Manalo; Medado; Mercado; O.J.T.; Onza; Polotan                                                                                                                                                                                                                                                                                                                                                                                                                                                                                                                                                                                                                 |
| EPI_ISL_2020239                                                                                                                                                                                                                                                                                                                                 | Bintulu Hospital                                                                                                            | Institute for Medical Research, Infectious Disease Research Centre, National Institutes of Health, Ministry of Health Malaysia             | Azizan MA; Kamel K; Mohd Zawawi Z; Ramly N; Robert F; Suppliah J; Thayan R                                                                                                                                                                                                                                                                                                                                                                                                                                                                                                                                                                                                                                                              |
| EPI_ISL_1273096, EPI_ISL_1502569, EPI_ISL_1502572, EPI_ISL_1502574, EPI_ISL_1502575, EPI_ISL_1502578, EPI_ISL_2107514, EPI_ISL_2107517                                                                                                                                                                                                          | see above                                                                                                                   | Biochemistry and Molecular Biology Department-Faculty of Medicine, Al-Quds University                                                      | Al-Jawabreh, A.; Al-Jawabreh, H.; Dumaidi, K.; Ereqat, S.; Naserddin, A.; Naserddin, A.                                                                                                                                                                                                                                                                                                                                                                                                                                                                                                                                                                                                                                                 |
| EPI_ISL_1756605                                                                                                                                                                                                                                                                                                                                 | Biogroup Bio Lam-LCD Saint-Denis                                                                                            | Department of Virology, Henri Mondor University Hospital, Assistance Publique Hôpitaux de Paris, Université Paris-Est Créteil, INSERM U955 | Alexandre Soulier; Christophe Rodriguez; Elisabeth Trawinski; Guillaume Gricourt; Jean-Michel Pawlatsky; Melissa N'Debi; Slim Fourati; Vanessa Demontant                                                                                                                                                                                                                                                                                                                                                                                                                                                                                                                                                                                |
| EPI_ISL_429996, EPI_ISL_429998, EPI_ISL_730282, EPI_ISL_730528, EPI_ISL_755250, EPI_ISL_755255                                                                                                                                                                                                                                                  | Biolab Diagnostic Laboratories                                                                                              | Andersen lab at Scripps Research                                                                                                           | Ahmad Tibi; Amid Abdelnour with SEARCH Alliance San Diego; Issa Abu-Dayyeh; Lama Hussein; Lina Mohammad; Zein Naber                                                                                                                                                                                                                                                                                                                                                                                                                                                                                                                                                                                                                     |
| EPI_ISL_977537, EPI_ISL_977600, EPI_ISL_977602, EPI_ISL_1406143, EPI_ISL_1406183, EPI_ISL_1406202, EPI_ISL_1822601, EPI_ISL_1824718, EPI_ISL_1970824, EPI_ISL_1970825, EPI_ISL_1970826, EPI_ISL_1970829, EPI_ISL_1970830, EPI_ISL_1970832, EPI_ISL_1970834, EPI_ISL_2105670, EPI_ISL_2105671, EPI_ISL_2105672, EPI_ISL_2105673, EPI_ISL_2105674 | see above                                                                                                                   | Biolab Diagnostic Laboratories                                                                                                             | Ahmad Tibi; Amid Abdelnour; Badia Saddedin; Eiad Atwa; Issa Abu-Dayyeh; Lama Hussein; Shayma Ali                                                                                                                                                                                                                                                                                                                                                                                                                                                                                                                                                                                                                                        |
| EPI_ISL_2039394                                                                                                                                                                                                                                                                                                                                 | Biological Hazard and Health Research Laboratory, Centre for Advanced Research in Science (CARS), University of Dhaka       | Genomic Research Lab, BCSIR                                                                                                                | Abu Sayeed Mohammad Mahmud; Barna Goswami; Eshrar Osman; Iffat Jahan; Latif Bari; Md Abdul Malek; Md Mizanur Rahaman; Md. Ahasan Habib; Md. Kamrul Islam; Md. Murshed Hasan Sarkar; Md. Saddam Hossain; Md. Salim Khan; Md. Shamunur Rahman; Mohammad Mohi Uddin; Mohammad Samir Uzzaman; Shahina Akter; Tanjina Akhter Banu                                                                                                                                                                                                                                                                                                                                                                                                            |
| EPI_ISL_527001                                                                                                                                                                                                                                                                                                                                  | Biological prevention, army                                                                                                 | Biological prevention, army                                                                                                                | A.E.; A.F.; A.M.; Ageez; B.E.; Elhoseiny; Gad; Harty; M.D.; M.F.; M.G.; Seadawy; Shabaan; Shamel                                                                                                                                                                                                                                                                                                                                                                                                                                                                                                                                                                                                                                        |
| EPI_ISL_1524330, EPI_ISL_1524337, EPI_ISL_1524355, EPI_ISL_1524357, EPI_ISL_1524360, EPI_ISL_1524379                                                                                                                                                                                                                                            | Biology Department, College of Science, Al Muthanna University and Public Health Laboratory, Al-Muthanna Health Directorate | Department of Virology, Faculty of Medicine, University of Helsinki, Helsinki, Finland                                                     | Alaa Hameed; Ali Jasim; Hussein Alburkat; Murad Munahi; Nihad Al-Rashedi; Olli Valpalaiti; Tarja Sironen; Teemu Smura                                                                                                                                                                                                                                                                                                                                                                                                                                                                                                                                                                                                                   |
| EPI_ISL_2153106                                                                                                                                                                                                                                                                                                                                 | Biology, Gaziantep University                                                                                               | Biology, Gaziantep University                                                                                                              | Al-Attar; Khailany; M.O.; M.S.; Ozaslan, M.; R.A.; Rahman                                                                                                                                                                                                                                                                                                                                                                                                                                                                                                                                                                                                                                                                               |
| EPI_ISL_1420701, EPI_ISL_1420704, EPI_ISL_1420767, EPI_ISL_1420770, EPI_ISL_1420786                                                                                                                                                                                                                                                             | Biomedical Research Foundation of the Academy of Athens (BRFAA)                                                             | Greek Genome Center, Biomedical Research Foundation of the Academy of Athens (BRFAA)                                                       | Dimitrios Thanos; Emmanouil Athanasiadis; Ioannis Vatsellas; Katerina Zoi; Theodoros Loupis                                                                                                                                                                                                                                                                                                                                                                                                                                                                                                                                                                                                                                             |
| EPI_ISL_1916916, EPI_ISL_1916938                                                                                                                                                                                                                                                                                                                | Bionex Lab                                                                                                                  | Laboratoire national de sante, Microbiology, Microbial Genomics Platform                                                                   | Anke Wienecke-Baldacchino; Catherine Ragimbeau; Fatu Djabi; Jessica Tapp; Lise Pignon; Raoul Salmon; Tamir Abdelrahman; Thibault Ferrandon                                                                                                                                                                                                                                                                                                                                                                                                                                                                                                                                                                                              |
| EPI_ISL_2232064, EPI_ISL_2232068                                                                                                                                                                                                                                                                                                                | Biopathology - Clinical Microbiology, Department Clinical and Laboratory Research, University of Thessaly                   | Greek Genome Center, Biomedical Research Foundation of the Academy of Athens (BRFAA)                                                       | Dimitrios Thanos; Eftimia Petinaki; Emmanouil Athanasiadis; Gianni Vatsellas; Katerina Zoi; Theodoros Loupis                                                                                                                                                                                                                                                                                                                                                                                                                                                                                                                                                                                                                            |
| EPI_ISL_1804839, EPI_ISL_2227844, EPI_ISL_2227847                                                                                                                                                                                                                                                                                               | Biopstická laborato, s.r.o.                                                                                                 | Biopstická laborato, s.r.o.                                                                                                                | Martina Putzová; Michaela Iňová; Nikola Bilá; Petr Šteiner; Silva Vondráková; Tomáš Vanek                                                                                                                                                                                                                                                                                                                                                                                                                                                                                                                                                                                                                                               |
| EPI_ISL_985116                                                                                                                                                                                                                                                                                                                                  | Biorepository and Clinical Virology Laboratory                                                                              | Ozer Lab                                                                                                                                   | Adeola A. Fowotade; Babafemi O. Taiwo; Egon A. Ozer; Ewan C. Omoruyi; Johnson A. Adeniji; Judd F. Hultquist; Lacy M. Simons; Olubusuyi M. Adewumi; Ramon Lorenzo-Redondo                                                                                                                                                                                                                                                                                                                                                                                                                                                                                                                                                                |

|                                                                                                                                                                                                                                                             |                                                                                                                                        |                                                                                                                                                                                                         |                                                                                                                                                                                                                                                                                                                                                                                                                                                                                                                                                                                                                                                                                                                                                                                                                                                                                                                                                                                                                                                                                                                                                                                                                                                                                                                                                                                                                                                                                                                                                                                                                                                                                                                                                                                                                                                                                |
|-------------------------------------------------------------------------------------------------------------------------------------------------------------------------------------------------------------------------------------------------------------|----------------------------------------------------------------------------------------------------------------------------------------|---------------------------------------------------------------------------------------------------------------------------------------------------------------------------------------------------------|--------------------------------------------------------------------------------------------------------------------------------------------------------------------------------------------------------------------------------------------------------------------------------------------------------------------------------------------------------------------------------------------------------------------------------------------------------------------------------------------------------------------------------------------------------------------------------------------------------------------------------------------------------------------------------------------------------------------------------------------------------------------------------------------------------------------------------------------------------------------------------------------------------------------------------------------------------------------------------------------------------------------------------------------------------------------------------------------------------------------------------------------------------------------------------------------------------------------------------------------------------------------------------------------------------------------------------------------------------------------------------------------------------------------------------------------------------------------------------------------------------------------------------------------------------------------------------------------------------------------------------------------------------------------------------------------------------------------------------------------------------------------------------------------------------------------------------------------------------------------------------|
| EPI_ISL_1141302<br>EPI_ISL_1970261                                                                                                                                                                                                                          | Bioscientia Labor Wermsdorf<br>Biotechnology Division, NCDC Delhi                                                                      | Robert Koch Institute<br>NCDC Delhi, Biotechnology Division                                                                                                                                             | Hema Gogia; Hemlata Lall; Kalaiarasan Ponnusamy; Mahesh S Dhar; Manoj K Singh; Meena Datta; Partha Rakshit; Preeti Madan; Priyanka Singh; Radhakrishnan V. S; Robin Marwal; Sandhya Kabra; Sujeet K Singh; Uma Sharma                                                                                                                                                                                                                                                                                                                                                                                                                                                                                                                                                                                                                                                                                                                                                                                                                                                                                                                                                                                                                                                                                                                                                                                                                                                                                                                                                                                                                                                                                                                                                                                                                                                          |
| EPI_ISL_1298483<br>EPI_ISL_718204                                                                                                                                                                                                                           | Bogorodchany CRH<br>Borneo Medical Centre                                                                                              | The Institute of Molecular Biology and Genetics of NASU<br>Institute of Health and Community Medicine                                                                                                   | M.Tukalo et al.<br>Chan Chia Jui; Chua Hock Hin; David Perera; Ooi Mong How; Tonnie Sia Loong Loong; Wong Jyn Shan; Wong Kiing Aik                                                                                                                                                                                                                                                                                                                                                                                                                                                                                                                                                                                                                                                                                                                                                                                                                                                                                                                                                                                                                                                                                                                                                                                                                                                                                                                                                                                                                                                                                                                                                                                                                                                                                                                                             |
| EPI_ISL_944790, EPI_ISL_965909, EPI_ISL_1287349, EPI_ISL_1293046, EPI_ISL_1516832, EPI_ISL_1516852, EPI_ISL_1516853, EPI_ISL_1516854, EPI_ISL_1516860, EPI_ISL_1516862, EPI_ISL_1516869, EPI_ISL_1524874, EPI_ISL_1524878, EPI_ISL_1524885, EPI_ISL_2153476 | see above                                                                                                                              | Botswana Harvard HIV Reference Laboratory                                                                                                                                                               | Boitumelo Zuze; Botshelo Radibe; David Lawrence; Dorcas Maruapula; Joseph; Joseph Makhema; Keoratlhe Ntshambiwa; Kgomotso Moruisi; Legodile Kooepile; Madisa Mine; Makhema; Mosepele Mosepele; Ontlametse T. Bareng; Pamela Smith-Lawrence; Roger Shapiro; Shahin Lockman; Sikhulile Dorcas Maruapula; Sikhulile Moyo; Sikhulile Wonderful T. Choga; Simani Gaseitsiwe; Thongthombo Mphoyakgosi; Wonderful T. Choga                                                                                                                                                                                                                                                                                                                                                                                                                                                                                                                                                                                                                                                                                                                                                                                                                                                                                                                                                                                                                                                                                                                                                                                                                                                                                                                                                                                                                                                            |
| EPI_ISL_1972089, EPI_ISL_2096235, EPI_ISL_2096725                                                                                                                                                                                                           | Broad Institute Clinical Research Sequencing Platform                                                                                  | Infectious Disease Program, Broad Institute of Harvard and MIT                                                                                                                                          | Adams, G.; B.L.; B.W.; Bauer, M.; Birren; Blumenstiel, B.; Brown, C.; Carter, A.; Chaluvadi, S.; D.J.; DeFelice, M.; DeRuff, K.; Dodge, S.; Gabriel, S.; Gallagher, G.; Gladden-Young, A.; Granger, B.; J.E.; K.J.; Lagerborg, K.; Larkin, K.; Lee, M.; Lemieux, Lennon, N.; Loreth, C.; Madoff, L.; McGovern, S.; Meldrim, J.; Normandin, E.; P.C.; Park; Peariman, L.; Reilly, S.; Rudy, M.; Sabeti; Smole, S.; Tomkins-Tinch, C.; Vicente, G.; and MacInnis                                                                                                                                                                                                                                                                                                                                                                                                                                                                                                                                                                                                                                                                                                                                                                                                                                                                                                                                                                                                                                                                                                                                                                                                                                                                                                                                                                                                                 |
| EPI_ISL_1000998, EPI_ISL_1034756, EPI_ISL_1034757, EPI_ISL_1034759, EPI_ISL_1046791, EPI_ISL_1046793                                                                                                                                                        | Bundeswehr Institute of Microbiology                                                                                                   | Bundeswehr Institute of Microbiology                                                                                                                                                                    | Alexandra Rehn; Enrico Georgi; Malena Bestehorn-Willmann; Markus Antwerpen; Mathias Walter; Mike Pillukat; Roman Wölfel; Sabine Zange                                                                                                                                                                                                                                                                                                                                                                                                                                                                                                                                                                                                                                                                                                                                                                                                                                                                                                                                                                                                                                                                                                                                                                                                                                                                                                                                                                                                                                                                                                                                                                                                                                                                                                                                          |
| EPI_ISL_1298474<br>EPI_ISL_1371900<br>EPI_ISL_1135056<br>EPI_ISL_1966802                                                                                                                                                                                    | Burshytn CCH<br>C H DE LA POLYNESIE FRANCAISE<br>C.H. PRINCESSE GRACE<br>CENTRO DE SAUDE DE RIBEIRAO DO SUL                            | The Institute of Molecular Biology and Genetics of NASU<br>CNR Virus des Infections Respiratoires - France SUD<br>CNR Virus des Infections Respiratoires - France SUD<br>Instituto Butantan / Mendelics | M.Tukalo et al.<br>Antonin Bal; Bruno Lina; Gregory Destras; Gwendolynne Burfin; Hadrien Regue; Laurence Josset; Martine Valette; Quentin Semanas<br>Antonin Bal; Bruno Lina; Gregory Destras; Gwendolynne Burfin; Hadrien Regue; Laurence Josset; Martine Valette; Quentin Semanas<br>Antonio Jorge Martins; Bianca Cechetto Carlos, Mendelics; Bibiana Santos; Claudia Renata dos Santos Barros; Cintia Bittar; David Schlesinger. Hemocentro Ribeirão Preto; Simone Kashima; Debora Botequiu Moretti; Elaine Vieira dos Santos; Elisângela Chicaroni Mattos; Erika Freitas; Evandra Strazza Rodrigues; Felipe Allan da Silva da Costa; Flavia Aburjaile; Fábio Sossai Assato; Guilherme Campos; Guilherme Targino Valente; Heidge Fukumasu. USP-Botucatu; Rejane Maria Tommasini Grotto; Helena Lage Ferreira; Instituto Butantan; Dimas Tadeu Covas; Jardelina de Souza Tadoo Bernardino; Jayme A. Souza-Neto; Jessica Cristina Chagas Lesbon; Jorge A. Petrolí Marchesi; José Salvatore Leister Patané; João Paulo Kitajima; João Pessoa Araújo Jr.; Leila Sabrina Ullmann; Loyze Paola Oliveira de Lima; Luiz Aurelio de Campos Crispin, Centro de Genômica Funcional da ESALQ; Luiz Lehmann Coutinho; Luiz Carlos Junior de Alcantara; Livia Sacchetto; Maisa C. Pereira Parra; Maria Carolina Elias; Marta Giovanetti; Marília Moraes; Maurício Lacerda Nogueira. Prefeitura de Sao Paulo; Melissa Palmieri.; Patricia Akemi Assato; Paula Rahal; Paulo Inacio da Costa; Rafael dos Santos Bezerra; Raquel de Lello Rocha Campos Cassano. NGS Soluções Genômicas; Pilar Drummond Sampaio Corrêa Mariani. FZEA-USP Pirassununga; Mirele Daiana Poleti; Raul Machado Neto; Ricardo Augusto Brassaloti; Ricardo Haddad; Rodrigo Tocantins Calado. FAMERP-SJRP: Cecilia Artico Banho; Sandra Coccuzzo Sampaio; Svetoslav Nanev Slavov; Vagner Fonseca; Vincent Louis Viala |
| EPI_ISL_2209541                                                                                                                                                                                                                                             | CENTRO DE SAUDE DR JOAQUIM FERREIRA CRISTAIS PAULISTA                                                                                  | Instituto Butantan / Mendelics                                                                                                                                                                          | Antonio Jorge Martins; Claudia Renata dos Santos Barros; David Schlesinger; Debora Botequiu Moretti; Dimas Tadeu Covas; Elaine Cristina Marqueze; Elaine Vieira Santos; Evandra Strazza Rodrigues; Heidge Fukumasu; Jayme Augusto de Souza-Neto; José Salvatore Leister Patané; Luiz Alcantara; Luiz Lehmann Coutinho; Maria Carolina Elias; Maurício Lacerda Nogueira; Rafael dos Santos Bezerra; Raul Machado Neto; Rejane Maria Tommasini Grotto; Ricardo Haddad; Sandra Coccuzzo Sampaio Vessoni; Simone Kashima; Svetoslav Nanev Slavov; Vincent Louis Viala                                                                                                                                                                                                                                                                                                                                                                                                                                                                                                                                                                                                                                                                                                                                                                                                                                                                                                                                                                                                                                                                                                                                                                                                                                                                                                              |
| EPI_ISL_644223                                                                                                                                                                                                                                              | CEPHR / Vincent's Hospital                                                                                                             | Irish Coronavirus Sequencing Consortium - National Virus Reference Laboratory                                                                                                                           | Alejandro Abner Garcia Leon; Gabriel Gonzalez; Michael Carr; Patrick Mallon                                                                                                                                                                                                                                                                                                                                                                                                                                                                                                                                                                                                                                                                                                                                                                                                                                                                                                                                                                                                                                                                                                                                                                                                                                                                                                                                                                                                                                                                                                                                                                                                                                                                                                                                                                                                    |
| EPI_ISL_1695988                                                                                                                                                                                                                                             | CH. CHU DE REIMS                                                                                                                       | Department of Virology, Henri Mondor University Hospital, Assistance Publique Hôpitaux de Paris, Université Paris-Est Créteil, INSERM U955                                                              | Alexandre Soulier; Christophe Rodriguez; Elisabeth Trawinski; Guillaume Gricourt; Jean-Michel Pawlowsky; Melissa N'Debi; Slim Fourati; Vanessa Demontant                                                                                                                                                                                                                                                                                                                                                                                                                                                                                                                                                                                                                                                                                                                                                                                                                                                                                                                                                                                                                                                                                                                                                                                                                                                                                                                                                                                                                                                                                                                                                                                                                                                                                                                       |
| EPI_ISL_965447<br>EPI_ISL_1577347                                                                                                                                                                                                                           | CHR de la Citadelle<br>CHU Lille                                                                                                       | GIGA Medical Genomics<br>CHU Lille - Laboratoire de Virologie                                                                                                                                           | Bouchra Boujemla; Cécile Meex; Keith Durkin; Maria Artesi; Marie-Pierre Hayette; Pierrette Melin; Raphaël Boreux; Sébastien Bontems; Vincent Bours<br>AIT YAHYA Emilie; ALIDJINOU Enagnon Kazali; BOCKET Laurence; CREPIN Michel; DEMAY Christophe; ENGELMANN Ika; GEFFROY Sandrine; GUIGON Aurélie; LAMBERT Valérie; LAZREK Mouna; NOBILLIAUX Florian; PREVOST Brigitte; TCHANTCHOU NJOSSE YANICK; THUILLIER Caroline; TINEZ Claire                                                                                                                                                                                                                                                                                                                                                                                                                                                                                                                                                                                                                                                                                                                                                                                                                                                                                                                                                                                                                                                                                                                                                                                                                                                                                                                                                                                                                                           |
| EPI_ISL_1517357, EPI_ISL_2137386<br>EPI_ISL_683835<br>EPI_ISL_487454<br>EPI_ISL_445255                                                                                                                                                                      | CHUV<br>CICM<br>CICM-Mali<br>CLINICA ALEMANA DE SANTIAGO S.A.                                                                          | Laboratory of genomics and metagenomics<br>Malaria Research and Training Center (MRTC-Parasito)<br>Bundeswehr Institut of Microbiology<br>Instituto de Salud Publica de Chile                           | Claire Bertelli; Damien Jacot; Gilbert Greub; SÃ@bastien Aeb; Sébastien Aeb; Trestan Pillonel<br>Abdoulaye Djimde; Antoine Dara<br>Antwerpen; Bestehorn-Willmann; Dürr; Heitzer; Kouriba; Maiga; Quedraogo; Rehn; Sangaré; Sogodogo; Traoré; Walter; Wölfel; Zimmermann<br>Alejandra Acevedo; Andrés E Castillo; Bárbara Parra; Carolina Tambley; Gabriel Leal; Jaime Lagos; Jorge Fernandez; Loredana Arata; Patricia Bustos; Paz Tapia; Rodrigo Fasce; Winston Andrade                                                                                                                                                                                                                                                                                                                                                                                                                                                                                                                                                                                                                                                                                                                                                                                                                                                                                                                                                                                                                                                                                                                                                                                                                                                                                                                                                                                                       |
| EPI_ISL_2103415                                                                                                                                                                                                                                             | CLINICA CATOLICA                                                                                                                       | Incienza, Instituto Costarricense de Investigación y Enseñanza en Nutrición y Salud                                                                                                                     | Adriana Godínez; Caterina Guzmán; Claudio Soto-Garita; Estela Cordero; Francisco Duarte; Hebleen Porras; Joselyn Prado; José Luis Vargas; Mariela Gutiérrez; Melany Calderón; Nazareth Ruiz & Mariel López                                                                                                                                                                                                                                                                                                                                                                                                                                                                                                                                                                                                                                                                                                                                                                                                                                                                                                                                                                                                                                                                                                                                                                                                                                                                                                                                                                                                                                                                                                                                                                                                                                                                     |
| EPI_ISL_1591100                                                                                                                                                                                                                                             | CMA Dano                                                                                                                               | Centre Muraz                                                                                                                                                                                            | Abdoul-Salam Quedraogo; Ange Badjo; Armel Poda; Arsène Somé; Arsène Zongo; Essia Belarbi; Fabian Leendertz; Firmin Kaboré; Grit Schubert; Jasmin Schlotterbeck; Soumeya Ouangraoua; Thérèse Kagone; Yacouba Sawadogo                                                                                                                                                                                                                                                                                                                                                                                                                                                                                                                                                                                                                                                                                                                                                                                                                                                                                                                                                                                                                                                                                                                                                                                                                                                                                                                                                                                                                                                                                                                                                                                                                                                           |
| EPI_ISL_1313609                                                                                                                                                                                                                                             | CNR Virus des Infections Respiratoires - France SUD                                                                                    | CNR Virus des Infections Respiratoires - France SUD                                                                                                                                                     | Antonin Bal; Bruno Lina; Gregory Destras; Gwendolynne Burfin; Hadrien Regue; Laurence Josset; Martine Valette; Quentin Semanas                                                                                                                                                                                                                                                                                                                                                                                                                                                                                                                                                                                                                                                                                                                                                                                                                                                                                                                                                                                                                                                                                                                                                                                                                                                                                                                                                                                                                                                                                                                                                                                                                                                                                                                                                 |
| EPI_ISL_2227272, EPI_ISL_2227273, EPI_ISL_2227280<br>EPI_ISL_2227268                                                                                                                                                                                        | COVID-19 National Reference Laboratory, Pasteur Institute of Iran<br>COVID-19 National Reference Laboratory, Pasteur Institute of Iran | Genetics Research Center, University of Social Welfare and Rehabilitation Sciences<br>Genetics Research Center, University of Social Welfare and Rehabilitation Sciences                                | Hossein Najmabadi.; Kimia Kahrizi; Mahsa Tavakoli; Marzieh Mohseni; Mostafa Salehi-Vaziri; Tahmineh Jalali; Zohreh Fattahi; Mohammad Hassan Pouriayevali<br>Hossein Najmabadi.; Kimia Kahrizi; Mahsa Tavakoli; Marzieh Mohseni; Mostafa Salehi-Vaziri; Tahmineh Jalali; Zohreh Fattahi; Mohammad Hassan Pouriayevali                                                                                                                                                                                                                                                                                                                                                                                                                                                                                                                                                                                                                                                                                                                                                                                                                                                                                                                                                                                                                                                                                                                                                                                                                                                                                                                                                                                                                                                                                                                                                           |
| EPI_ISL_1190749, EPI_ISL_1190753, EPI_ISL_1190757<br>EPI_ISL_2209116                                                                                                                                                                                        | CREMER(Centre de Recherches sur les Maladies Emergentes et Ré-émergentes)<br>CS DE BALSAMO                                             | TransVIHMI(Recherches Translationnelles sur le VIH et les Maladies Infectieuses)<br>Instituto Butantan                                                                                                  | Ahidjo Ayoub; Celestin Godwe; Christelle Butel; Dowbiss Meta Djomsi; Eitel Mpoudi Ngole; Eric Delaporte; Esemu Livo; Laetitia Serrano; Marcel Tongo; Marie Amougou; Martin Maidadi Foudi; Martine Peeters; Nicole Vidal; Rodrigue Kamga<br>Antonio Jorge Martins; Claudia Renata dos Santos Barros; David Schlesinger; Debora Botequiu Moretti; Dimas Tadeu Covas; Elaine Cristina Marqueze; Elaine Vieira Santos; Evandra Strazza Rodrigues; Heidge Fukumasu; Jayme Augusto de Souza-Neto; José Salvatore Leister Patané; Luiz Alcantara; Luiz Lehmann Coutinho; Maria Carolina Elias; Maurício Lacerda Nogueira; Rafael dos Santos Bezerra; Raul Machado Neto; Rejane Maria Tommasini Grotto; Ricardo Haddad; Sandra Coccuzzo Sampaio Vessoni; Simone Kashima; Svetoslav Nanev Slavov; Vincent Louis Viala.                                                                                                                                                                                                                                                                                                                                                                                                                                                                                                                                                                                                                                                                                                                                                                                                                                                                                                                                                                                                                                                                  |
| EPI_ISL_458054, EPI_ISL_495224, EPI_ISL_528828, EPI_ISL_910218                                                                                                                                                                                              | CSIR-Centre for Cellular and Molecular Biology                                                                                         | CSIR-Centre for Cellular and Molecular Biology                                                                                                                                                          | Ajay Sarawagi; Archana Bharadwaj Siva; B Himasri; Blessy B John; Deepak Kumar; Devi Prasad Vijayashankar; Dhiviya Vedagiri; Disha Nanda; Divya Das; Divya Gupta; Divya Tej Sowpati; G. Aditya Kumar; Jotin Gogoi; Karthik Bharadwaj Tallapaka; Koushick Sivakumar; Krishnan Harinivas Harshan; Lamuk Zaveri; M Soujanya Reddy; Manish Bhattacharjee; Namami Gaur; Nikhil Hajrims; Onkar Kulkarni; Payel Mukherjee; Pratheusa Maccha; Priya Singh; Priyanka Pant; Purushotham Vodnala; Rajkanwar Nathawat; Rakesh K Mishra; Sakshi Shambhavi; Santosh Kumar Kuncha; Shagufta Khan; Sofia Banu; Tulasi Nagabandi; Umesh Kumar; Unis Ahmad Bhat; Vishal Sah; Viswagithe S L                                                                                                                                                                                                                                                                                                                                                                                                                                                                                                                                                                                                                                                                                                                                                                                                                                                                                                                                                                                                                                                                                                                                                                                                       |
| EPI_ISL_1380091                                                                                                                                                                                                                                             | CSIR-Centre for Cellular and Molecular Biology                                                                                         | CSIR-Centre for Cellular and Molecular Biology-INSACOG                                                                                                                                                  | Archana Bharadwaj Siva; B Himasri; Blessy B John; Divya Tej Sowpati; Karthik Bharadwaj Tallapaka; Lamuk Zaveri; Namami Gaur; Payel Mukherjee; Pratheusa Maccha; Priya Singh; Purushotham Vodnala; Rakesh K Mishra; Sofia Banu; Tulasi Nagabandi; Viswagithe S L                                                                                                                                                                                                                                                                                                                                                                                                                                                                                                                                                                                                                                                                                                                                                                                                                                                                                                                                                                                                                                                                                                                                                                                                                                                                                                                                                                                                                                                                                                                                                                                                                |
| EPI_ISL_1663854<br>EPI_ISL_2234907                                                                                                                                                                                                                          | CURATIVE<br>CYRLAB                                                                                                                     | New Mexico Department of Health Scientific Laboratory<br>IICS-UNA                                                                                                                                       | Anastacia Griego-Fisher; D'eldra Malone; Ellie Johnson; Jennifer Benoit<br>Adriana Valenzuela; Alejandra Rojas; Chyntia Diaz; Eva Nara; Fatima Cardozo; Florencia del Puerto; Joel Ortiz; Jonas Fernandez; Laura Franco; Laura Mendoza; Leticia Rojas; Magaly Martinez; Maria Eugenia Galeano.                                                                                                                                                                                                                                                                                                                                                                                                                                                                                                                                                                                                                                                                                                                                                                                                                                                                                                                                                                                                                                                                                                                                                                                                                                                                                                                                                                                                                                                                                                                                                                                 |

|                                                                                                                                                                                                                                                                                                                                                                                                                                                                                                                   |                                                                                                                                                                                                                                                        |                                                                                                                                                                                                                                                                                                         |                                                                                                                                                                                                                                                                                                                                                                                                                                                                                                                                                                                                                                                                                                                                                                                                                                                     |
|-------------------------------------------------------------------------------------------------------------------------------------------------------------------------------------------------------------------------------------------------------------------------------------------------------------------------------------------------------------------------------------------------------------------------------------------------------------------------------------------------------------------|--------------------------------------------------------------------------------------------------------------------------------------------------------------------------------------------------------------------------------------------------------|---------------------------------------------------------------------------------------------------------------------------------------------------------------------------------------------------------------------------------------------------------------------------------------------------------|-----------------------------------------------------------------------------------------------------------------------------------------------------------------------------------------------------------------------------------------------------------------------------------------------------------------------------------------------------------------------------------------------------------------------------------------------------------------------------------------------------------------------------------------------------------------------------------------------------------------------------------------------------------------------------------------------------------------------------------------------------------------------------------------------------------------------------------------------------|
| EPI_ISL_2105322, EPI_ISL_2154757, EPI_ISL_2155709, EPI_ISL_2156581                                                                                                                                                                                                                                                                                                                                                                                                                                                | Cagayan Valley Medical Center Molecular Laboratory                                                                                                                                                                                                     | Philippine Genome Center                                                                                                                                                                                                                                                                                | Alethea R. de Guzman; Anna Ong-Lim; Arianne A. Zamora; Asia Louisa U. Chong; Benedict A. Maralit; Candice Francheska B. Tambaoan; Carlo M. Lapid; Celia Carlos; Devon Ray Pacial; Edsel Maurice Salvaña; El King D. Morado; Elcid Aaron R. Pangilinan; Eva Maria Cutiungco-de la Paz; Francis A. Tablizo; Irish Coleen A. Asin; Jaime C. Montoya; Jan Michael C. Yap; Jo-Hannah S. Ljames; John Q. Wong; Joshua Gregor A. Dizon; Juan Antonio R. Magalang; Karol Sophia Agape R. Padilla; Kenneth M. Kim; Kris P. Punayan; Marc Edsel C. Ayes; Marc Jerrone R. Castro; Maria Rosario Singh-Vergeira and Cynthia P. Saloma; Maria Sofia L. Yangzon; Marissa Alejandria; Razel Nikka M. Hao; Rianna Patricia S. Cruz; Sheila Mae M. Araiza                                                                                                            |
| EPI_ISL_984515<br>EPI_ISL_1817717                                                                                                                                                                                                                                                                                                                                                                                                                                                                                 | California Department of Public Health<br>Calvinia Corr Centre                                                                                                                                                                                         | Chiu Laboratory, University of California, San Francisco<br>NHLS/UCT                                                                                                                                                                                                                                    | Candace Wang; Charles Chiu; Debra Wadford; Jill Hacker; Venice Servellita; Xianding (Wayne) Deng<br>Arash Iranzadeh; Bruna Galvao; Carolyn Williamson; Deelan Doolabh; Diana Hardie; Innocent Mudau; Kruger Marais; Lynn Tyers; Marvin Hsiao; Stephen Korsman                                                                                                                                                                                                                                                                                                                                                                                                                                                                                                                                                                                       |
| EPI_ISL_1096139, EPI_ISL_1096140, EPI_ISL_1098602, EPI_ISL_1098605, EPI_ISL_1532812, EPI_ISL_2106269<br>EPI_ISL_890202, EPI_ISL_890224                                                                                                                                                                                                                                                                                                                                                                            | Cambodian National Public Health Laboratory, National Institute of Public Health<br>Cancer Biology Department, National Cancer Institute                                                                                                               | Virology Unit, Institut Pasteur du Cambodge<br>Cancer Biology Department, National Cancer Institute                                                                                                                                                                                                     | Cecile Troupin; Chau Darapeak; Chin Savuth; Erik A Karlsson; Jurre Y Siegers; Kraing Sidonn; Leakhena Pum; Ly Sovann; Sokhoun Yann; Teyputita Ou; Veasna Duong; Yi Sengdoeurn<br>A.A.; A.E.; A.N.; Abouelhoda, M.; Ahmed; Bahnassy; Elhosieni; F.W.; Gad; H.K.; Hafez; Hamdy; M.G.; M.M.; M.S.; O.S.; Sedawy; Soliman; Soliman, L.; Zekri                                                                                                                                                                                                                                                                                                                                                                                                                                                                                                           |
| EPI_ISL_456350, EPI_ISL_548116, EPI_ISL_548117, EPI_ISL_548118, EPI_ISL_548138, EPI_ISL_548139, EPI_ISL_579064, EPI_ISL_579067, EPI_ISL_579069, EPI_ISL_579071, EPI_ISL_579072, EPI_ISL_579077, EPI_ISL_579079, EPI_ISL_579092, EPI_ISL_579426, EPI_ISL_622780, EPI_ISL_622784, EPI_ISL_622788, EPI_ISL_622790, EPI_ISL_622795, EPI_ISL_622797, EPI_ISL_622799, EPI_ISL_622810, EPI_ISL_622828, EPI_ISL_622830, EPI_ISL_661260, EPI_ISL_682284, EPI_ISL_843195, EPI_ISL_1082255, EPI_ISL_1904855, EPI_ISL_1967890 | see above<br>Canterbury Health Laboratories                                                                                                                                                                                                            | Institute of Environmental Science and Research (ESR)                                                                                                                                                                                                                                                   | Anja Werno; Antje van der Linden; Arlo Upton; Chris Mansell; David Hammer; Dragana Drinkovic; Erasmus Smit; Gary McAuliffe; Hana Sofia Andersson; Hermes Perez; James Ussher; Jill Sherwood; Jing Wang; Joep de Ligt; Josh Freeman; Julia Howard; Juliet Elvy; Lauren Jelly; Mary DeAlmeida; Matt Blakiston; Matt Storey; Matthew Rogers; Max Bloomfield; Michael Addidle; Michelle Balm; Muhammad Faisal; Nikki Freed; Olin Silander; Olivia Stroeven; Paula scholes; Rachel Boyle; Sally Roberts; SallyAnn Harbison; Sarah Jefferies; Sharmini Muttaiyah; Susan Lin; Susan Morpeth; Susan Taylor; Timothy Blackmore; Vani Sathyendran; Veronica Playle; Virginia Hope; Xiaoyun Ren                                                                                                                                                                |
| EPI_ISL_1300655                                                                                                                                                                                                                                                                                                                                                                                                                                                                                                   | Cantonal Hospital Zenica; Department of Microbiological Diagnostics                                                                                                                                                                                    | Clinical Center, University of Sarajevo; Unit for Clinical Microbiology                                                                                                                                                                                                                                 | Amela Dedei-Ljubovi; Edina Zahirovi; Golubinka Boshevka; Irma Salimovi-Beši; Maja Kuzmanovska; Sandra Vegar-Zubovi; Sebjia Izetbegovi; Suzana Arapi                                                                                                                                                                                                                                                                                                                                                                                                                                                                                                                                                                                                                                                                                                 |
| EPI_ISL_1591250, EPI_ISL_1591265, EPI_ISL_1591351, EPI_ISL_1591458, EPI_ISL_1591459, EPI_ISL_1591518, EPI_ISL_1591718, EPI_ISL_2225271                                                                                                                                                                                                                                                                                                                                                                            | see above<br>Caribbean Public Health Agency                                                                                                                                                                                                            | Carrington Lab, Department of PreClinical Sciences, Faculty of Medical Sciences, The University of the West Indies                                                                                                                                                                                      | Adesh Ramsubhag; Arianne Brown-Jordan; Avery Hinds; Chinna Chinnadurai; Christine V. F. Carrington; Christopher Oura; Gabriel Escobar; Jaya Jayaraman; Jerome Foster; Karla Georges; Marsha Ivey; Naresh Nandram; Nikita S. D. Sahadeo; Nuno Faria; Oliver Pybus; Rahul Naidu; Rajini Haraksingh; Risha Singh; Roshan Parasram; Sarah Hill; Stanley Giddings; SueMin Nathaniel; Vernie Ramkissoon                                                                                                                                                                                                                                                                                                                                                                                                                                                   |
| EPI_ISL_1591720                                                                                                                                                                                                                                                                                                                                                                                                                                                                                                   | Caribbean Public Health Laboratory                                                                                                                                                                                                                     | Carrington Lab, Department of PreClinical Sciences, Faculty of Medical Sciences, The University of the West Indies                                                                                                                                                                                      | Adesh Ramsubhag; Arianne Brown-Jordan; Avery Hinds; Chinna Chinnadurai; Christine V. F. Carrington; Christopher Oura; Gabriel Escobar; Jaya Jayaraman; Jerome Foster; Karla Georges; Marsha Ivey; Naresh Nandram; Nikita S. D. Sahadeo; Nuno Faria; Oliver Pybus; Rahul Naidu; Rajini Haraksingh; Risha Singh; Roshan Parasram; Sarah Hill; Stanley Giddings; SueMin Nathaniel; Vernie Ramkissoon                                                                                                                                                                                                                                                                                                                                                                                                                                                   |
| EPI_ISL_1220046                                                                                                                                                                                                                                                                                                                                                                                                                                                                                                   | Carvajal Laboratorio IPS SAS                                                                                                                                                                                                                           | Instituto Nacional de Salud- Dirección de Investigación en Salud Pública                                                                                                                                                                                                                                | Carlos Franco-Muñoz; Diego A. Álvarez-Díaz; Diego Andrés Prada; Gerardo Santamaría; Hector Alejandro Ruiz-Moreno; Jhonattan Reales-González; Julian Naizaque; Katherine Laiton-Donato; Magdalena Wiesner; Marcela Mercado-Reyes.; Maria T. Herrera-Sepúlveda; Martha Lucia Ospina Martínez; Sheryll Corchuelo                                                                                                                                                                                                                                                                                                                                                                                                                                                                                                                                       |
| EPI_ISL_526745<br>EPI_ISL_1594295<br>EPI_ISL_437993, EPI_ISL_438054, EPI_ISL_853891<br>EPI_ISL_1346634                                                                                                                                                                                                                                                                                                                                                                                                            | Center for Laboratory Control of Infectious Diseases, Korea Centers for Diseases Control and Prevention<br>Center for Laboratory Medicine St. Gallen<br>Center for Virology, Medical University of Vienna<br>Center of Excellence in Clinical Virology | Center for Laboratory Control of Infectious Diseases, Korea Centers for Diseases Control and Prevention<br>Center for Laboratory Medicine St. Gallen<br>Bergthaler laboratory, CeMM Research Center for Molecular Medicine of the Austrian Academy of Sciences<br>Research Unit of Systems Microbiology | Ae Kyung Park; Eunkyung Shin; Heui Man Kim; Jeong-Min Kim; Jin Sun No; Junyoung Kim; Myung Guk Han; Yoon-Seok Chung<br>Yannick Gerth<br>Alexander Lercher; Alexandra Popa; Andreas Bergthaler; Anna Schedl; Benedikt Agerer; Christoph Bock; Christoph Bock; Dorothee von Laer; Elisabeth Puchhammer-Stoeckl; Guenter Weiss; Henrique Colaco; Jakob-Wendelin Genger; Jan Laine; Judith Aberle; Lukas Endler; Manfred Nairz; Mark Smyth; Martin Senekowitsch; Martin Senekowitsch; Michael Schuster; Michael Schuster; Stephan Aberle; Thomas Penz; Wvegene Borena<br>Amornmas Kongklieng; Anek Mungaomklang; Jira Chansaenroj; Jiratchaya Puenpa; Kamolthip Atsawawaranunt; Oraphan Mayuramat; Pakkaporn Panwijitkul; Pattaraporn Nimsamer; Ritthideach Yorsaeng; Sunchai Payungporn; Suwanna Petto; Vichan Pawan; Vorthon Sawaswong; Yong Poovowan |
| EPI_ISL_2227329, EPI_ISL_2227332, EPI_ISL_2227337, EPI_ISL_2227339, EPI_ISL_2227348, EPI_ISL_2232355, EPI_ISL_2232396                                                                                                                                                                                                                                                                                                                                                                                             | see above<br>Center of Scientific Excellence for Influenza Viruses (CSEIV), National Research Centre                                                                                                                                                   | Center of Scientific Excellence for Influenza Viruses (CSEIV), National Research Centre                                                                                                                                                                                                                 | Ahmed E Kayed; Ahmed El-Taweel; Ahmed Kandeil; Ahmed Mostafa; Amal Naguib; Ghazi Kayali; M K Khalifa; Mahmoud Shehata; Mina Kamel; Mohamed Ahmed Ali; Mohamed El Sayes; Mohamed Hassany; Mokhtar Gomaa; Nancy M. El Guindy; Noura M Abo Shama; Ornina Kutkat; Rabeh El-Shesheny; Richard Webby; Sara Mahmoud; Shymaa S Ahmed; Wael Roshdy; Yassmin Moatasim                                                                                                                                                                                                                                                                                                                                                                                                                                                                                         |
| EPI_ISL_940969<br>EPI_ISL_815255, EPI_ISL_815257<br>EPI_ISL_794594                                                                                                                                                                                                                                                                                                                                                                                                                                                | Centers for Disease Control and Prevention, Dengue Branch<br>Centogene<br>Central Laboratories, Egyptian Ministry of Health and Population                                                                                                             | Centers for Disease Control and Prevention, Dengue Branch<br>Centogene<br>Central Laboratories, Egyptian Ministry of Health and Population                                                                                                                                                              | Betzabel Flores; Gabriela Paz-Bailey; Gilberto A. Santiago; Glenda Gonzalez; Jorge L. Munoz-Jordan; Keyla Charriez<br>Krishna Kumar Kandaswamy; Peter Bauer; Vivi Hue-Trang Lieu<br>A.E.; Ali; El Guindy; El Sayes; El Taweel, A.; El-Shesheny, R.; Gomaa, M.; Kamel; Kandeil, A.; Kayali, G.; Kayed; Khalifa; Kutkat, O.; M.A.; M.K.; M.N.; Mahmood; Mahrous, N.; Moatasim, Y.; Mostafa, A.; N.M.; Naguib, A.; Roshdy; S.H.; Saleh, M.; Shawky, S.; Shehata, M.; W.H.                                                                                                                                                                                                                                                                                                                                                                              |
| EPI_ISL_693472, EPI_ISL_693473, EPI_ISL_693477, EPI_ISL_693478, EPI_ISL_693480, EPI_ISL_693481, EPI_ISL_693482, EPI_ISL_693483, EPI_ISL_1307667, EPI_ISL_1307676, EPI_ISL_1322328, EPI_ISL_1322330                                                                                                                                                                                                                                                                                                                | see above<br>Central Public Health Laboratory                                                                                                                                                                                                          | National Public Health Laboratory, National Centre for Infectious Diseases                                                                                                                                                                                                                              | Esorom Daoni; Lin Cui; Raymond Tzer Pin Lin; Sophie Octavia; Theresa Palou; Tze Minn Mak; Zhenyang Zhou                                                                                                                                                                                                                                                                                                                                                                                                                                                                                                                                                                                                                                                                                                                                             |
| EPI_ISL_1583647                                                                                                                                                                                                                                                                                                                                                                                                                                                                                                   | Central Public Health Laboratory - LACEN -Bahia, Salvador, Brazil                                                                                                                                                                                      | Central Public Health Laboratory - LACEN -Bahia, Salvador, Brazil                                                                                                                                                                                                                                       | Arabela Leal; Breno Dominguez; Felicidade Pereira; Jaqueline Gomes; Luciana Oliveira; Luiz Alcantara; Marcela Gómez; Marta Giovanetti; Patricia Cajado; Stephane Tosta; Vagner Fonseca; Vanessa Nardy                                                                                                                                                                                                                                                                                                                                                                                                                                                                                                                                                                                                                                               |
| EPI_ISL_1920767                                                                                                                                                                                                                                                                                                                                                                                                                                                                                                   | Central Public Health Laboratory, National Public Health Organization                                                                                                                                                                                  | Central Public Health Laboratory, National Public Health Organization                                                                                                                                                                                                                                   | Grigoris Spanakos; Kleon Karadimas et al; Kyriaki Tryfinopoulou; Olga Pappa                                                                                                                                                                                                                                                                                                                                                                                                                                                                                                                                                                                                                                                                                                                                                                         |
| EPI_ISL_2232147, EPI_ISL_2232163                                                                                                                                                                                                                                                                                                                                                                                                                                                                                  | Central Public Health Laboratory, National Public Health Organization                                                                                                                                                                                  | Greek Genome Center, Biomedical Research Foundation of the Academy of Athens (BRFAA)                                                                                                                                                                                                                    | Dimitrios Thanos; Emmanouil Athanasiadis; Gianni Vatsellas; Katerina Zoi; Kyriaki Tryfinopoulou; Theodoros Loupis                                                                                                                                                                                                                                                                                                                                                                                                                                                                                                                                                                                                                                                                                                                                   |
| EPI_ISL_2141845<br>EPI_ISL_961826                                                                                                                                                                                                                                                                                                                                                                                                                                                                                 | Centrāla Laboratorija<br>Centrāla laboratorija                                                                                                                                                                                                         | Latvian Biomedical Research and Study Centre<br>Latvian Biomedical Research and Study Centre                                                                                                                                                                                                            | Davids Fridmanis; Elina Dimina; Guntars Zarins; Ivars Silamikelis; Jana Osite; Janis Klovins; Janis Pjalkovskis; Juris Perevoscikovs; Kaspars Megnis; Laila Silamikele; Lauma Freimane; Laura Ansona; Liga Birzniece; Marta Priedite; Monta Ustinova; Nikita Zrelavs; Uga Dumpis; Uga Krumina; Vita Rovite<br>Davids Fridmanis; Ivars Silamikelis; Jana Osite; Janis Pjalkovskis; Janis Klovins; Juris Perevoscikovs; Kaspars Megnis; Laila Silamikele; Lauma Freimane; Laura Ansona; Liga Birzniece; Marta Priedite; Monta Ustinova; Nikita Zrelavs; Uga Dumpis; Uga Krumina; Vita Rovite                                                                                                                                                                                                                                                          |
| EPI_ISL_1357603<br>EPI_ISL_2214804<br>EPI_ISL_2002649<br>EPI_ISL_1299492                                                                                                                                                                                                                                                                                                                                                                                                                                          | Centre For Biotechnology Research And Development<br>Centre Hospitalier RIOM<br>Centre Hospitalier Universitaire Clermont-Ferrand<br>Centre Hospitalo Universitaire Sourou Sanou                                                                       | THE AFRICA GENOMICS CENTRE AND CONSULTANCY<br>CHU Clermont-Ferrand, service de virologie<br>CHU Clermont-Ferrand, service de virologie<br>Centre Muraz                                                                                                                                                  | Adede Hawi; Cecilia Waruhii; Damaris Matoke-Muhia; George Michuki; John Njuguna; Lilian Kanjau; Ravena Mubichi<br>Bisseux Maxime; Combes Patricia; Henquell Cécile; Mirand Audrey<br>Bisseux Maxime; Combes Patricia; Henquell Cécile; Mirand Audrey<br>Abdoul-Salam Ouedraogo; Ange Badjo; Armel Poda; Arsène Somé; Arsène Zongo; Essia Belarbi; Fabian Leendertz; Firmin Kaboré; Grit Schubert; Jasmin Schlotterbeck; Soumeiya Ouangraoua; Thérèse Kagone; Yacouba Sawadogo                                                                                                                                                                                                                                                                                                                                                                       |
| EPI_ISL_1001051, EPI_ISL_1001052, EPI_ISL_1001060, EPI_ISL_1257881, EPI_ISL_1790108, EPI_ISL_1790110, EPI_ISL_1790123                                                                                                                                                                                                                                                                                                                                                                                             | see above<br>Centre Pasteur du Cameroun                                                                                                                                                                                                                | Institut Pasteur de Dakar                                                                                                                                                                                                                                                                               | Carniel Elisabeth; Dia Ndongo; Diagne Moussa Moïse; Diallo Amadou; Diop Mamadou; Elisabeth Carniel; Faye Ousmane; Loucoubar Cheikh; Ndiaye Ndack; Njoum Richard; Sall Amadou Alpha; Sankhe Safietou                                                                                                                                                                                                                                                                                                                                                                                                                                                                                                                                                                                                                                                 |
| EPI_ISL_788933, EPI_ISL_788937                                                                                                                                                                                                                                                                                                                                                                                                                                                                                    | Centre de Recherche et de Formation en Infectiologie Guinée                                                                                                                                                                                            | TransVIHMI, IRD/INSERM/Monpellier University                                                                                                                                                                                                                                                            | Abdoul Karim SOUMAH; Abdoulaye TOURE; Ahidjo AYOUBA; Alimou CAMARA; Alpha Kabinet KEITA; Bouna; Bouna Yatassaye; Christelle BUTEL; Eric DELAPORTE; Jean-louis MONEMOU; Joel KOIVOGUI; Kaba KOUROUMA; Laetitia SERRANO; Mamadou Bhoie KEITA; Mamadou Saliou BAH;                                                                                                                                                                                                                                                                                                                                                                                                                                                                                                                                                                                     |

|                                                                                                                                                                                                                                                                                                                  |           |                                                                                                                                                                                                                     |                                                                                                                                                                                                                                                                                                                                                                                                                                                                                                                                                                                                                                                                                                                                                                                                                                                                                                                                                                                                                                                      |
|------------------------------------------------------------------------------------------------------------------------------------------------------------------------------------------------------------------------------------------------------------------------------------------------------------------|-----------|---------------------------------------------------------------------------------------------------------------------------------------------------------------------------------------------------------------------|------------------------------------------------------------------------------------------------------------------------------------------------------------------------------------------------------------------------------------------------------------------------------------------------------------------------------------------------------------------------------------------------------------------------------------------------------------------------------------------------------------------------------------------------------------------------------------------------------------------------------------------------------------------------------------------------------------------------------------------------------------------------------------------------------------------------------------------------------------------------------------------------------------------------------------------------------------------------------------------------------------------------------------------------------|
|                                                                                                                                                                                                                                                                                                                  |           |                                                                                                                                                                                                                     | Mamadou Saliou SOW; Mandiou DIAKITE; Martine PEETERS; Moriba POVOGUI; Penda Malhado DIALLO; Sakoba KEITA                                                                                                                                                                                                                                                                                                                                                                                                                                                                                                                                                                                                                                                                                                                                                                                                                                                                                                                                             |
| EPI_ISL_1615655, EPI_ISL_1935059, EPI_ISL_2035987, EPI_ISL_2036089, EPI_ISL_2036090, EPI_ISL_2097222, EPI_ISL_2097223, EPI_ISL_2097228, EPI_ISL_2156796                                                                                                                                                          | see above | Centre de Recherches Médicales de Lambaréné (CERMEL)                                                                                                                                                                | Centre de Recherches Médicales de Lambaréné (CERMEL)                                                                                                                                                                                                                                                                                                                                                                                                                                                                                                                                                                                                                                                                                                                                                                                                                                                                                                                                                                                                 |
| EPI_ISL_978547                                                                                                                                                                                                                                                                                                   |           | Centre de Virologie des Maladies infectueuses Tropicales                                                                                                                                                            | Functional Genomic Platform UATRS-biology, CNRS                                                                                                                                                                                                                                                                                                                                                                                                                                                                                                                                                                                                                                                                                                                                                                                                                                                                                                                                                                                                      |
| EPI_ISL_525476, EPI_ISL_525479                                                                                                                                                                                                                                                                                   |           | Centre for Dengue Research                                                                                                                                                                                          | Centre for Dengue Research                                                                                                                                                                                                                                                                                                                                                                                                                                                                                                                                                                                                                                                                                                                                                                                                                                                                                                                                                                                                                           |
| EPI_ISL_1233057, EPI_ISL_1233059, EPI_ISL_1233061, EPI_ISL_1233081, EPI_ISL_1233089, EPI_ISL_1233105, EPI_ISL_1239361, EPI_ISL_1239362, EPI_ISL_1239363, EPI_ISL_1533808, EPI_ISL_1533817, EPI_ISL_1717059, EPI_ISL_1717090, EPI_ISL_1717092, EPI_ISL_1717093, EPI_ISL_1717103, EPI_ISL_1970361, EPI_ISL_1970404 | see above | Centre for Dengue Research and AICBU, Department of Immunology and Molecular Medicine                                                                                                                               | Centre for Dengue Research and AICBU, Department of Immunology and Molecular Medicine                                                                                                                                                                                                                                                                                                                                                                                                                                                                                                                                                                                                                                                                                                                                                                                                                                                                                                                                                                |
| EPI_ISL_602576, EPI_ISL_668452, EPI_ISL_668453                                                                                                                                                                                                                                                                   |           | Centre for Dengue Research, Department of Immunology and Molecular Medicine                                                                                                                                         | Centre for Dengue Research, Department of Immunology and Molecular Medicine                                                                                                                                                                                                                                                                                                                                                                                                                                                                                                                                                                                                                                                                                                                                                                                                                                                                                                                                                                          |
| EPI_ISL_413550                                                                                                                                                                                                                                                                                                   |           | Centre for Human and Zoonotic Virology (CHAZVY), College of Medicine University of Lagos/Lagos University Teaching Hospital (LUTH), part of the Laboratory Network of the Nigeria Centre for Disease Control (NCDC) | African Centre of Excellence for Genomics of Infectious Diseases (ACEGID), Redeemer's University, Ede, Osun State, Nigeria                                                                                                                                                                                                                                                                                                                                                                                                                                                                                                                                                                                                                                                                                                                                                                                                                                                                                                                           |
| EPI_ISL_407893, EPI_ISL_408976, EPI_ISL_417030                                                                                                                                                                                                                                                                   |           | Centre for Infectious Diseases and Microbiology Laboratory Services                                                                                                                                                 | NSW Health Pathology - Institute of Clinical Pathology and Medical Research; Westmead Hospital; University of Sydney                                                                                                                                                                                                                                                                                                                                                                                                                                                                                                                                                                                                                                                                                                                                                                                                                                                                                                                                 |
| EPI_ISL_427741                                                                                                                                                                                                                                                                                                   |           | Centre for Infectious Diseases and Microbiology Public Health                                                                                                                                                       | NSW Health Pathology - Institute of Clinical Pathology and Medical Research; Westmead Hospital; University of Sydney                                                                                                                                                                                                                                                                                                                                                                                                                                                                                                                                                                                                                                                                                                                                                                                                                                                                                                                                 |
| EPI_ISL_1494764                                                                                                                                                                                                                                                                                                  |           | Centro Hospitalar de Entre o Douro e Vouga (CHEDV)                                                                                                                                                                  | Institute of Biomedicine (IBIMED), Universidade de Aveiro                                                                                                                                                                                                                                                                                                                                                                                                                                                                                                                                                                                                                                                                                                                                                                                                                                                                                                                                                                                            |
| EPI_ISL_2104796                                                                                                                                                                                                                                                                                                  |           | Centro Hospitalar do Baixo Vouga (CHBV)                                                                                                                                                                             | Institute of Biomedicine (IBIMED), Universidade de Aveiro                                                                                                                                                                                                                                                                                                                                                                                                                                                                                                                                                                                                                                                                                                                                                                                                                                                                                                                                                                                            |
| EPI_ISL_837553, EPI_ISL_837557, EPI_ISL_837560, EPI_ISL_837567, EPI_ISL_837569, EPI_ISL_837570, EPI_ISL_837572, EPI_ISL_837576, EPI_ISL_837577, EPI_ISL_837578                                                                                                                                                   | see above | Centro Nacional de Enfermedades Tropicales (CENETROP)                                                                                                                                                               | Laboratory of Respiratory Viruses and Measles, Oswaldo Cruz Institute, FIOCRUZ                                                                                                                                                                                                                                                                                                                                                                                                                                                                                                                                                                                                                                                                                                                                                                                                                                                                                                                                                                       |
| EPI_ISL_1494948                                                                                                                                                                                                                                                                                                  |           | Centro de Atención y Diagnóstico de Enfermedades Infecciosas                                                                                                                                                        | Instituto Nacional de Salud- Dirección de Investigación en Salud Pública                                                                                                                                                                                                                                                                                                                                                                                                                                                                                                                                                                                                                                                                                                                                                                                                                                                                                                                                                                             |
| EPI_ISL_2231373, EPI_ISL_2231515                                                                                                                                                                                                                                                                                 |           | Centro de Diagnostico COVID-19 UABC Tijuana                                                                                                                                                                         | Andersen lab at Scripps Research                                                                                                                                                                                                                                                                                                                                                                                                                                                                                                                                                                                                                                                                                                                                                                                                                                                                                                                                                                                                                     |
| EPI_ISL_2031709, EPI_ISL_2031712, EPI_ISL_2031719, EPI_ISL_2031726, EPI_ISL_2031734, EPI_ISL_2031742, EPI_ISL_2031753, EPI_ISL_2031755, EPI_ISL_2031761                                                                                                                                                          | see above | Centro de Innovación en Vigilancia Epidemiológica (CIVE), Institut Pasteur Montevideo, Uruguay                                                                                                                      | Centro de Innovación en Vigilancia Epidemiológica (CIVE), Institut Pasteur Montevideo, Uruguay                                                                                                                                                                                                                                                                                                                                                                                                                                                                                                                                                                                                                                                                                                                                                                                                                                                                                                                                                       |
| EPI_ISL_1662190                                                                                                                                                                                                                                                                                                  |           | Centro de Investigación Biomedica de Occidente (CIBO)                                                                                                                                                               | Unidad de Genómica Avanzada                                                                                                                                                                                                                                                                                                                                                                                                                                                                                                                                                                                                                                                                                                                                                                                                                                                                                                                                                                                                                          |
| EPI_ISL_1661982                                                                                                                                                                                                                                                                                                  |           | Centro de Investigación Biomedica del Noreste (CIBIN)                                                                                                                                                               | Unidad de Genómica Avanzada                                                                                                                                                                                                                                                                                                                                                                                                                                                                                                                                                                                                                                                                                                                                                                                                                                                                                                                                                                                                                          |
| EPI_ISL_1469108                                                                                                                                                                                                                                                                                                  |           | Centro de Investigación en Ciencias de la Salud y Biomedicina                                                                                                                                                       | CINVESTAV                                                                                                                                                                                                                                                                                                                                                                                                                                                                                                                                                                                                                                                                                                                                                                                                                                                                                                                                                                                                                                            |
| EPI_ISL_2007473                                                                                                                                                                                                                                                                                                  |           | Centro de Investigaciones Básicas y Aplicadas, UNNOBA                                                                                                                                                               | Área de Secuenciación del Laboratorio de Virología del Hospital de Niños Dr. Ricardo Gutiérrez on behalf of 'Proyecto Argentino Interinstitucional de genómica de SARS-CoV-2' (PAIS Consortium)                                                                                                                                                                                                                                                                                                                                                                                                                                                                                                                                                                                                                                                                                                                                                                                                                                                      |
| EPI_ISL_1351549, EPI_ISL_1351656                                                                                                                                                                                                                                                                                 |           | Centro de Investigación Biomédica de Occidente (CIBO)                                                                                                                                                               | Unidad de Genómica Avanzada                                                                                                                                                                                                                                                                                                                                                                                                                                                                                                                                                                                                                                                                                                                                                                                                                                                                                                                                                                                                                          |
| EPI_ISL_2091258, EPI_ISL_2091278, EPI_ISL_2091301, EPI_ISL_2091314                                                                                                                                                                                                                                               |           | Centro de Investigación Biomédica de Occidente (CIBO)                                                                                                                                                               | Centro de Investigación en Enfermedades Infecciosas (CIENI), Instituto Nacional de Enfermedades Respiratorias (INER)                                                                                                                                                                                                                                                                                                                                                                                                                                                                                                                                                                                                                                                                                                                                                                                                                                                                                                                                 |
|                                                                                                                                                                                                                                                                                                                  |           |                                                                                                                                                                                                                     | Armel MINTSA NDONG; Bertrand Lell and Ayola Akim Adegnika; Bénédicte NDEBOKO; Georgelin NGUEMA ONDO; Georgelin Nguema Ondo; Gédéon Prince Manouana; Jean Bernard LEKANA-DOUKI; Jean Bernard Lekana-Douki; Joël-Fléury DJOBA SIAWAYA; Joël-Fléury Djoba Siawaya; Moustapha Nzamba Maloum; Rodrigue BIKANGUI; Rodrigue Bikangui; Sam O'Neill Oye Bingono; Samira ZOA ASSOUMOU; Samira Zoa Assoumou; Srinivas reddy Pallerla; Steffen Borrmann; Thirumalaisamy P. Velavan                                                                                                                                                                                                                                                                                                                                                                                                                                                                                                                                                                               |
|                                                                                                                                                                                                                                                                                                                  |           |                                                                                                                                                                                                                     | ; Abdellilah LARAQUI; Abderrazzak Rkaki; Elmoustafa BENAÏSSA; Elmoustafa EL FAHIME; Farida HILALI; Hemlali Mouhssine; Khalid ENNIBI; Marouane MELLOUL; Mly Abdelaziz ELALAOUI; Mostafa ELLOUENASS; Nadia Toul; Sanaa ALAOUI-Amine; Tahar BAJJOU; Yassin SEKHSSOKH                                                                                                                                                                                                                                                                                                                                                                                                                                                                                                                                                                                                                                                                                                                                                                                    |
|                                                                                                                                                                                                                                                                                                                  |           |                                                                                                                                                                                                                     | Ananda Wijewickrama; Chandima Jeewandara; Damayanthi Idampitiya; Deshni Jayathilaka; Dinuka Ariyaratne; Dinuka Guruge; Diyanath Ranasinghe; Eranga Narangoda; Gathsaurie Neelika Malavige; Laksiri Gomes; Ruwan Wijayamuni                                                                                                                                                                                                                                                                                                                                                                                                                                                                                                                                                                                                                                                                                                                                                                                                                           |
|                                                                                                                                                                                                                                                                                                                  |           |                                                                                                                                                                                                                     | Chandima Jeewandara; Deshan Madhusanka; Deshni Jayathilaka; Dinuka Ariyaratne; Diyanath Ranasinghe; Gathsaurie Neelika Malavige; Laksiri Gomes; Tibutius Thanesh Pramanayagam                                                                                                                                                                                                                                                                                                                                                                                                                                                                                                                                                                                                                                                                                                                                                                                                                                                                        |
|                                                                                                                                                                                                                                                                                                                  |           |                                                                                                                                                                                                                     | Chandima Jeewandara; Deshni Jayathilaka; Dinuka Ariyaratne; Diyanath Ranasinghe; Gathsaurie Neelika Malavige; Laksiri Gomes                                                                                                                                                                                                                                                                                                                                                                                                                                                                                                                                                                                                                                                                                                                                                                                                                                                                                                                          |
|                                                                                                                                                                                                                                                                                                                  |           |                                                                                                                                                                                                                     | Ajogbasile F.V.; Folarin O.A.; Ihekweazu C. Happi C.T.; Kayode A.; Oguzie J.; Olunji P.E.                                                                                                                                                                                                                                                                                                                                                                                                                                                                                                                                                                                                                                                                                                                                                                                                                                                                                                                                                            |
|                                                                                                                                                                                                                                                                                                                  |           |                                                                                                                                                                                                                     | Carter I; Chen SC; Eden J-S; Holmes EC; Kok J and Dwyer DE for the 2019-nCoV Study Group; Kok J and Dwyer DE for the 2019-nCoV Study Group*; Maddocks S; O'Sullivan MV; Rahman H; Rockett R; Sadsad R; Sintchenko V                                                                                                                                                                                                                                                                                                                                                                                                                                                                                                                                                                                                                                                                                                                                                                                                                                  |
|                                                                                                                                                                                                                                                                                                                  |           |                                                                                                                                                                                                                     | Arnott A; Bachmann N; Basile K; Byun R; Carter I; Chang S; Chen SC; Draper J; Dwyer DE for the 2019-nCoV Study Group; Eden JS; Gall M; Gray K; Holmes EC; Kok J; Lam C; Maddocks S; O'Sullivan MV; Propenko M; Rockett R; Sadsad R; Sim E; Sintchenko V; Sorrell T; Timms V                                                                                                                                                                                                                                                                                                                                                                                                                                                                                                                                                                                                                                                                                                                                                                          |
|                                                                                                                                                                                                                                                                                                                  |           |                                                                                                                                                                                                                     | Gabriela Moura; Miguel Pinheiro and Manuel Santos; Patricia Arinto; Sofia Marques                                                                                                                                                                                                                                                                                                                                                                                                                                                                                                                                                                                                                                                                                                                                                                                                                                                                                                                                                                    |
|                                                                                                                                                                                                                                                                                                                  |           |                                                                                                                                                                                                                     | Gabriela Moura; Miguel Pinheiro and Manuel Santos; Patricia Arinto; Sofia Marques                                                                                                                                                                                                                                                                                                                                                                                                                                                                                                                                                                                                                                                                                                                                                                                                                                                                                                                                                                    |
|                                                                                                                                                                                                                                                                                                                  |           |                                                                                                                                                                                                                     | Ana Carolina Mendonca; Anna Carolina Paixao; Cinthia Avila; Fernando Motta; Luciana Appolinario; Marilda Siqueira on behalf of the Fiocruz COVID-19 Genomic Surveillance Network; Paola Resende; Roxana Loayza                                                                                                                                                                                                                                                                                                                                                                                                                                                                                                                                                                                                                                                                                                                                                                                                                                       |
|                                                                                                                                                                                                                                                                                                                  |           |                                                                                                                                                                                                                     | Carlos Franco-Muñoz; Carmen Osorio; Diana Malo; Diego A. Álvarez-Díaz; Diego Andrés Prada; Gerardo Santamaría; Hector Alejandro Ruiz-Moreno; Jhonnatan Reales-González; Juan Camilo Martínez; Julian Naizaque; Katherine Laiton-Donato; Liseth Pardo; Magdalena Wiesner; Marcela Mercado-Reyes; María T. Herrera-Sepúlveda; Marta Lopez Blanco; Martha Lucia Ospina Martinez; Paola Rojas; Sergio Gomez; Sheryll Corchuelo; Ángela Alarcon Cruz                                                                                                                                                                                                                                                                                                                                                                                                                                                                                                                                                                                                      |
|                                                                                                                                                                                                                                                                                                                  |           |                                                                                                                                                                                                                     | German Ibarra; Jonathan Vincent Baena; Jorge Luis Jimenez Niebla; Manuel Sanchez Alavez; Oscar Efrén Zazueta Fierro; SEARCH Alliance San Diego with Idanya Rubi Serafin Higuera                                                                                                                                                                                                                                                                                                                                                                                                                                                                                                                                                                                                                                                                                                                                                                                                                                                                      |
|                                                                                                                                                                                                                                                                                                                  |           |                                                                                                                                                                                                                     | Alicia Costabile; Alvaro Fajardo; Andrés Lizosain; Belén González; Bernardina Rivera; Cecilia Alfonso; Cecilia Salazar; Gonzalo Moratorio; Gregorio Iraola; Henry Albornoz; Ignacio Ferrés; Inés Bellini; Juan Zanetti; Julio Medina; Luciana Gilber; Lucia Spangenberg; Ma Noel Bentancor; Ma Pia Techera; Mailen Arleo; Martina Alonso; María José Benítez; Matías Maidana; Mauricio Méndez; Melissa Duquia; Mercedes Paz; Natalia Rego; Natalia Reyes; Odhille Chappos; Paula Perbolianachis; Pilar Moreno; Rodney Colina; Rodrigo Arce; Tamara Fernández; Tania Possi                                                                                                                                                                                                                                                                                                                                                                                                                                                                            |
|                                                                                                                                                                                                                                                                                                                  |           |                                                                                                                                                                                                                     | Alejandro Sanchez-Flores; Alfredo Herrera-Estrella; Alicia Ocana-Mondragon; Angel Gustavo Salas-Lais; Bernardo Martinez-Miguel; Blanca Taboada; Brenda Irasema Maldonado-Meza; Carla Ivon Herrera-Najera; Carlos F. Arias; Celia Boukadida; Celida Duque Molina; Clara Esperanza Santacruz-Tinoco; Concepcion Grajales-Muniz; Consorcio Mexicano de Vigilancia Genómica (CoViGen-Mex). Authors (in alphabetical order): Julio Elias Alvarado-Yaah; Fernando Fontove-Herrera; Francisco Pulido; Gloria Elena Espinosa-Ayala; Gloria Maria Molina-Salinas; Gloria Vazquez; Hector Esteban Paz-Juarez; Hector Montoya-Fuentes; Helen Haydee Fernanda Ramirez-Plascencia; Jose Antonio Enciso-Moreno; Jose Esteban Munoz-Medina; Jose de Jesus Nunez-Contreras; Juan Bautista Chale-Dzul; Luis Alberto Ochoa-Carrera; Margarita Matias-Florentino; Maria Guadalupe Santiago-Mauricio; Maria Guadalupe de Jesus Mireles-Rivera; Nelly Selem-Mojica; Pavel Isa; Ricardo Grande; Santiago Ávila-Rios; Victor Eduardo Garcia-Arias; Victor Hugo Borja-Aburto |
|                                                                                                                                                                                                                                                                                                                  |           |                                                                                                                                                                                                                     | Alejandro Sanchez-Flores; Alfredo Herrera-Estrella; Alicia Ocana-Mondragon; Angel Gustavo Salas-Lais; Bernardo Martinez-Miguel; Blanca Taboada; Brenda Irasema Maldonado-Meza; Carla Ivon Herrera-Najera; Carlos F. Arias; Celia Boukadida; Celida Duque Molina; Clara Esperanza Santacruz-Tinoco; Concepcion Grajales-Muniz; Consorcio Mexicano de Vigilancia Genómica (CoViGen-Mex). Authors (in alphabetical order): Julio Elias Alvarado-Yaah; Fernando Fontove-Herrera; Francisco Pulido; Gloria Elena Espinosa-Ayala; Gloria Maria Molina-Salinas; Gloria Vazquez; Hector Esteban Paz-Juarez; Hector Montoya-Fuentes; Helen Haydee Fernanda Ramirez-Plascencia; Jose Antonio Enciso-Moreno; Jose Esteban Munoz-Medina; Jose de Jesus Nunez-Contreras; Juan Bautista Chale-Dzul; Luis Alberto Ochoa-Carrera; Margarita Matias-Florentino; Maria Guadalupe Santiago-Mauricio; Maria Guadalupe de Jesus Mireles-Rivera; Nelly Selem-Mojica; Pavel Isa; Ricardo Grande; Santiago Ávila-Rios; Victor Eduardo Garcia-Arias; Victor Hugo Borja-Aburto |
|                                                                                                                                                                                                                                                                                                                  |           |                                                                                                                                                                                                                     | Acuña; Alexay; Bioq, Lucía Romano; D; Dr. Rodrigo Hernández del Pin; Dra. Alejandra Brandone y Dra. Natalí Bagnis; Dra. Carolina Cristina; Dra. Fiorella Spinelli; Dra. Gianina Demarchi; Dra. InaSevic; Dra. Laura Alaniz; Dra. Laura Palumbo; Dra. María Gracia Balbi; Dra. Virginia Pasquini; Est. Lorenzo Morro; Goya; LE; Lic. Agustina Chimento; Lic. Alejandra Fernández; Lic. Alejandro Moroni; Lic. Angela Barbero y Lic. Laureano Español; Lic. Antonella Icardi; Lic. Chiara Cassarini; Lic. Daiana Vitale; Lic. Micaela Castro; Lic. Nadia Bonadeo; Lic. Paolo Rosales; Lic. Sofia Perrone; Lic. Sofia Valla; Lusso; M; M; Nabaes Jodar; Natale; S; Tc. Gastón Villafañe; Tc. Natalia Menite; Valinotto; Viegas, M.                                                                                                                                                                                                                                                                                                                      |
|                                                                                                                                                                                                                                                                                                                  |           |                                                                                                                                                                                                                     | Alejandro Sanchez-Flores; Alfredo Herrera-Estrella; Alicia Ocana-Mondragon; Angel Gustavo Salas-Lais; Bernardo Martinez-Miguel; Blanca Taboada; Brenda Irasema Maldonado-Meza; Carla Ivon Herrera-Najera; Carlos F. Arias; Celia Boukadida; Clara Esperanza Santacruz-Tinoco; Concepcion Grajales-Muniz; Consorcio Mexicano de Vigilancia Genómica (CoViGen-Mex). Authors (in alphabetical order): Julio Elias Alvarado-Yaah; Fernando Fontove-Herrera; Francisco Pulido; Gloria Elena Espinosa-Ayala; Gloria Maria Molina-Salinas; Gloria Vazquez; Hector Esteban Paz-Juarez; Hector Montoya-Fuentes; Helen Haydee Fernanda Ramirez-Plascencia; Jorge Ivan Salinal-Navarez; Jose Antonio Enciso-Moreno; Jose Esteban Munoz-Medina; Jose de Jesus Nunez-Contreras; Juan Bautista Chale-Dzul; Luis Alberto Ochoa-Carrera; Margarita Matias-Florentino; Maria Guadalupe Santiago-Mauricio; Maria Guadalupe de Jesus Mireles-Rivera; Nelly Selem-Mojica; Pavel Isa; Ricardo Grande; Santiago Ávila-Rios; Victor Hugo Borja-Aburto                       |
|                                                                                                                                                                                                                                                                                                                  |           |                                                                                                                                                                                                                     | Alejandro Sanchez-Flores; Alfredo Herrera-Estrella; Alicia Ocana-Mondragon; Angel Gustavo Salas-Lais; Bernardo Martinez-Miguel; Blanca Taboada; Brenda Irasema Maldonado-Meza; Carla Ivon Herrera-Najera; Carlos F. Arias; Celia Boukadida; Clara Esperanza Santacruz-Tinoco; Concepcion Grajales-Muniz; Consorcio Mexicano de Vigilancia Genómica (CoViGen-Mex). Authors (in alphabetical order): Julio Elias Alvarado-Yaah; Celia Duque Molina; Fernando Fontove-Herrera; Francisco Pulido; Gloria Elena Espinosa-Ayala; Gloria Maria Molina-Salinas; Gloria Vazquez; Hector Esteban Paz-Juarez; Hector Montoya-Fuentes; Helen Haydee Fernanda Ramirez-Plascencia; José Antonio Enciso-Moreno; José Esteban Muñoz-Medina; José de Jesús Nuñez-Contreras; Juan Bautista Chale-Dzul; Luis Alberto Ochoa-Carrera; Margarita Matias-Florentino; María Guadalupe Santiago-Mauricio; María                                                                                                                                                               |

|                                                                                                      |                                                                             |                                                                                                                                                     |                                                                                                                                                                                                                                                                                                                                                                                                                                                                                                                                                                                                                                                                                                                                                                                                                                                                                                                                                                                                                                                      |
|------------------------------------------------------------------------------------------------------|-----------------------------------------------------------------------------|-----------------------------------------------------------------------------------------------------------------------------------------------------|------------------------------------------------------------------------------------------------------------------------------------------------------------------------------------------------------------------------------------------------------------------------------------------------------------------------------------------------------------------------------------------------------------------------------------------------------------------------------------------------------------------------------------------------------------------------------------------------------------------------------------------------------------------------------------------------------------------------------------------------------------------------------------------------------------------------------------------------------------------------------------------------------------------------------------------------------------------------------------------------------------------------------------------------------|
| EPI_ISL_1585553, EPI_ISL_1585554                                                                     | Centro de Investigación Biomédica de Occidente (CIBO)                       | Instituto Nacional de Enfermedades Respiratorias (INER); Centro de Investigación en Enfermedades Infecciosas (CIENI)                                | Guadalupe de Jesús Mireles-Rivera; Nelly Sélem-Mojica; Pavel Isa; Ricardo Grande; Santiago Ávila-Ríos; Víctor Eduardo García-Arias; Víctor Hugo Borja-Aburto                                                                                                                                                                                                                                                                                                                                                                                                                                                                                                                                                                                                                                                                                                                                                                                                                                                                                         |
| EPI_ISL_2091174                                                                                      | Centro de Investigación Biomédica del Noreste (CIBIN)                       | Centro de Investigación en Enfermedades Infecciosas (CIENI), Instituto Nacional de Enfermedades Respiratorias (INER)                                | Alejandro Sanchez-Flores; Alfredo Herrera-Estrella; Alicia Ocaña-Mondragón; Angel Gustavo Salas-Lais; Bernardo Martínez-Miguel; Blanca Taboada; Brenda Irasema Maldonado-Meza; Carla Ivón Herrera-Najera; Carlos F. Arias; Celia Boukadida; Clara Esperanza Santacruz-Tinoco; Concepción Grajales-Muñiz; Consorcio Mexicano de Vigilancia Genómica (CoViGen-Mex). Authors (in alphabetical order): Julio Elias Alvarado-Yaah; Célida Duque Molina; Fernando Fontove-Herrera; Francisco Pulido; Gloria Elena Espinosa-Ayala; Gloria María Molina-Salinas; Gloria Vazquez; Hector Esteban Paz-Juárez; Hector Montoya-Fuentes; Helen Haydee Fernanda Ramírez-Plascencia; José Antonio Enciso-Moreno; José Esteban Muñoz-Medina; José de Jesús Nuñez-Contreras; Juan Bautista Chale-Dzul; Luis Alberto Ochoa-Carrera; Margarita Matías-Florentino; María Guadalupe Santiago-Mauricio; María Guadalupe de Jesús Mireles-Rivera; Nelly Sélem-Mojica; Pavel Isa; Ricardo Grande; Santiago Ávila-Ríos; Víctor Eduardo García-Arias; Víctor Hugo Borja-Aburto |
| EPI_ISL_1279476, EPI_ISL_1279497, EPI_ISL_1585386, EPI_ISL_1585395                                   | Centro de Investigación Biomédica del Noreste (CIBIN)                       | Instituto Nacional de Enfermedades Respiratorias (INER); Centro de Investigación en Enfermedades Infecciosas (CIENI)                                | Alejandro Sanchez-Flores; Alfredo Herrera-Estrella; Alicia Ocaña-Mondragón; Angel Gustavo Salas-Lais; Bernardo Martínez-Miguel; Blanca Taboada; Brenda Irasema Maldonado-Meza; Carla Ivón Herrera-Najera; Carlos F. Arias; Celia Boukadida; Clara Esperanza Santacruz-Tinoco; Concepción Grajales-Muñiz; Consorcio Mexicano de Vigilancia Genómica (CoViGen-Mex). Authors (in alphabetical order): Julio Elias Alvarado-Yaah; Célida Duque Molina; Fernando Fontove-Herrera; Francisco Pulido; Gloria Elena Espinosa-Ayala; Gloria María Molina-Salinas; Gloria Vazquez; Hector Esteban Paz-Juárez; Hector Montoya-Fuentes; Helen Haydee Fernanda Ramírez-Plascencia; José Antonio Enciso-Moreno; José Esteban Muñoz-Medina; José de Jesús Nuñez-Contreras; Juan Bautista Chale-Dzul; Luis Alberto Ochoa-Carrera; Margarita Matías-Florentino; María Guadalupe Santiago-Mauricio; María Guadalupe de Jesús Mireles-Rivera; Nelly Sélem-Mojica; Pavel Isa; Ricardo Grande; Santiago Ávila-Ríos; Víctor Eduardo García-Arias; Víctor Hugo Borja-Aburto |
| EPI_ISL_1494674                                                                                      | Centro de Investigación en Ciencias de la Salud y Biomedicina, U.A.S.L.P.   | Centro de Investigación en Ciencias de la Salud y Biomedicina, U.A.S.L.P.                                                                           | MD PhD Sofía Bernal Silva                                                                                                                                                                                                                                                                                                                                                                                                                                                                                                                                                                                                                                                                                                                                                                                                                                                                                                                                                                                                                            |
| EPI_ISL_1494727                                                                                      | Centro de Investigación en Ciencias de la Salud y Biomedicina, U.A.S.L.P.   | Centro de Investigación en Ciencias de la Salud y Biomedicina, U.A.S.L.P.                                                                           | MD PhD Sofía Bernal Silva                                                                                                                                                                                                                                                                                                                                                                                                                                                                                                                                                                                                                                                                                                                                                                                                                                                                                                                                                                                                                            |
| EPI_ISL_1396467                                                                                      | Centro de Tecnología en Salud Pública de la Universidad Nacional de Rosario | Laboratorio Mixto de Biotecnología Acuática (LMBA) on behalf of 'Proyecto Argentino Interinstitucional de genómica de SARS-CoV-2' (PAIS Consortium) | Adriana Giri; Agustina Cerri; Ana Cavatorra; Ana Paletta; Diego Chouhy; Elisa Bolatti; Elizabeth Tapia (argenTAG); Federico Remes Lenicov; Flavio Spetale; Gastón Viarengo; Ignacio García Labari; Javier Arranz; Javier Arranz; Joaquín Ezpeleta; Julian Acosta; Laura Angelone; Leandro Ciappina; María Re; Pablo Casal; Pilar Bulacio; Silvana Spinelli; Silvia Arranz; Sofía Lavista Llanos; Vanina Villanova; Victoria Posner                                                                                                                                                                                                                                                                                                                                                                                                                                                                                                                                                                                                                   |
| EPI_ISL_1590390, EPI_ISL_1590996                                                                     | Centri Laboratorija; Eurofins Genomics Europe Sequencing GmbH               | Riga East University Hospital-National Microbiology Reference Laboratory; Eurofins Genomics Europe Sequencing GmbH                                  | Arzu Algulieva; Dina Dusacka; Drta Ppola; Ilva Pole; Jana Oste; Reinis Vangravs; Reinis Zeltmatis; Sergejs Niksins; Stella Lapia; irts Šenders                                                                                                                                                                                                                                                                                                                                                                                                                                                                                                                                                                                                                                                                                                                                                                                                                                                                                                       |
| EPI_ISL_753801                                                                                       | Charité Universitätsmedizin Berlin, Institut für Virologie/Labor Berlin     | Charité Universitätsmedizin Berlin, Institut für Virologie                                                                                          | Barbara Mühlemann; Christian Drosten; Julia Schneider; Jörn Beheim-Schwarzbach; Talitha Veith; Terry Jones; Victor M Corman                                                                                                                                                                                                                                                                                                                                                                                                                                                                                                                                                                                                                                                                                                                                                                                                                                                                                                                          |
| EPI_ISL_1932725, EPI_ISL_1933171                                                                     | Chiba Prefectural Institute of Public Health                                | Pathogen Genomics Center, National Institute of Infectious Diseases                                                                                 | Kentarō Itokawa; Makoto Kuroda; Masanori Hashino; Rina Tanaka; Tsuyoshi Sekizuka                                                                                                                                                                                                                                                                                                                                                                                                                                                                                                                                                                                                                                                                                                                                                                                                                                                                                                                                                                     |
| EPI_ISL_492028, EPI_ISL_768732, EPI_ISL_768742, EPI_ISL_1360425, EPI_ISL_1360428                     | Child Health Research Foundation                                            | Child Health Research Foundation                                                                                                                    | Afroza Akter Tanni; Arif Mohammad Tanmoy; CHRf Bangladesh Genomics Team; Maksuda Islam; Md Hafizur Rahman; Md Saiful Islam Sajib; Roly Malaker; Samir K Saha; Senjuti Saha; Sharmistha Goswami; Syed Muktedir Al Sium                                                                                                                                                                                                                                                                                                                                                                                                                                                                                                                                                                                                                                                                                                                                                                                                                                |
| EPI_ISL_2162200, EPI_ISL_2162212                                                                     | Children's City Clinical Infectious Diseases Hospital                       | Reference laboratory for the control of viral infections                                                                                            | Aidar Ussebayev; Aknur Mutaliyeva; Andrey Komissarov; Artem Fadeev; Azamat Kenessov; Bekzhan Maikotov; Gaukhar Nussupbayeva; Madina Teubergenova; Maria Pisareva; Nazym Teumbetova                                                                                                                                                                                                                                                                                                                                                                                                                                                                                                                                                                                                                                                                                                                                                                                                                                                                   |
| EPI_ISL_1970348                                                                                      | Chongqing International Travel Health Care Center                           | Chongqing Municipal Center for Disease Control and Prevention                                                                                       | Dong Wang; Haiyan Wen; Hua Ling; Lan Zhou; Mingyue Wang; Rong Rong; Sheng Ye; Shuang Chen; Wenge Tang; Yun Tang; Zhangping Tan; Zhen Yu                                                                                                                                                                                                                                                                                                                                                                                                                                                                                                                                                                                                                                                                                                                                                                                                                                                                                                              |
| EPI_ISL_2162180                                                                                      | City Clinical Infectious Diseases Hospital named after I.S. Zhekenova       | Reference laboratory for the control of viral infections                                                                                            | Aidar Ussebayev; Aknur Mutaliyeva; Andrey Komissarov; Artem Fadeev; Azamat Kenessov; Bekzhan Maikotov; Gaukhar Nussupbayeva; Madina Teubergenova; Maria Pisareva; Nazym Teumbetova                                                                                                                                                                                                                                                                                                                                                                                                                                                                                                                                                                                                                                                                                                                                                                                                                                                                   |
| EPI_ISL_2000860                                                                                      | City General Hospital "8 Septemvri"- Skopje                                 | Research Center for Genetic Engineering and Biotechnology "Georgi D. Efremov", Macedonian Academy of Sciences and Arts                              | Aleksandar J. Dimovski; Dijana Plasheska-Karanfilska; Gjorgji Bozinovski; Milena Jakimovska; Predrag Noveski                                                                                                                                                                                                                                                                                                                                                                                                                                                                                                                                                                                                                                                                                                                                                                                                                                                                                                                                         |
| EPI_ISL_1652157                                                                                      | City of Milwaukee Health Department Laboratory                              | City of Milwaukee Health Department Laboratory                                                                                                      | Sanjib Bhattacharyya                                                                                                                                                                                                                                                                                                                                                                                                                                                                                                                                                                                                                                                                                                                                                                                                                                                                                                                                                                                                                                 |
| EPI_ISL_1278785, EPI_ISL_1278941, EPI_ISL_1435662                                                    | Clalit Health Services Laboratories, Israel                                 | Stern Lab                                                                                                                                           | Stern Lab                                                                                                                                                                                                                                                                                                                                                                                                                                                                                                                                                                                                                                                                                                                                                                                                                                                                                                                                                                                                                                            |
| EPI_ISL_1363787                                                                                      | Clin & Gen Lab                                                              | Microbiología Molecular, Instituto SELADIS, Universidad Mayor de San Andrés                                                                         | Aneth Vasquez Michel; Oscar M. Rollano-Peñaloza                                                                                                                                                                                                                                                                                                                                                                                                                                                                                                                                                                                                                                                                                                                                                                                                                                                                                                                                                                                                      |
| EPI_ISL_1494958                                                                                      | Clinica Universitaria Medicina Integral - Laboratorio Molecular             | Instituto Nacional de Salud- Dirección de Investigación en Salud Pública                                                                            | Carlos Franco-Muñoz; Carmen Osorio; Diana Malo; Diego A. Álvarez-Díaz; Diego Andrés Prada; Gerardo Santamaría; Hector Alejandro Ruiz-Moreno; Jhonnatan Reales-González; Juan Camilo Martínez; Julian Naizaque; Katherine Laiton-Donato; Lisseth Pardo; Magdalena Wiesner; Marcela Mercado-Reyes; María T. Herrera-Sepúlveda; Marta Lopez Blanco; Martha Lucia Ospina Martínez; Paola Rojas; Sergio Gomez; Sheryll Corchuelo; Ángela Alarcon Cruz                                                                                                                                                                                                                                                                                                                                                                                                                                                                                                                                                                                                     |
| EPI_ISL_462461, EPI_ISL_462463                                                                       | Clinical Center, University of Sarajevo                                     | Charite Universitätsmedizin Berlin, Institute of Virology                                                                                           | Almedina Hadzhisanovic-Moro; Amela Dedeic-Ljubovic; Barbara Muehlemann; Christian Drosten; Irma Salimovi-Besic; Jörn Beheim-Schwarzbach; Julia Schneider; Selma Mutevelic; Suzana Arapic; Talitha Veith; Terry Jones; Victor M Corman                                                                                                                                                                                                                                                                                                                                                                                                                                                                                                                                                                                                                                                                                                                                                                                                                |
| EPI_ISL_1240073, EPI_ISL_1240075, EPI_ISL_1240076, EPI_ISL_1300649, EPI_ISL_1300653, EPI_ISL_1300658 | Clinical Center, University of Sarajevo; Unit for Clinical Microbiology     | Clinical Center, University of Sarajevo; Unit for Clinical Microbiology                                                                             | Amela Dedeic-Ljubovic; Edina Zahirovi; Golubinka Boshevska; Irma Salimovi-Besic; Maja Kuzmanovska; Sandra Vegar-Zubovi; Sebija Izetbegovi; Suzana Arapi                                                                                                                                                                                                                                                                                                                                                                                                                                                                                                                                                                                                                                                                                                                                                                                                                                                                                              |
| EPI_ISL_447423                                                                                       | Clinical Microbiology Laboratory, Sheba Medical Center                      | Stern Lab                                                                                                                                           | Stern Lab                                                                                                                                                                                                                                                                                                                                                                                                                                                                                                                                                                                                                                                                                                                                                                                                                                                                                                                                                                                                                                            |
| EPI_ISL_447394                                                                                       | Clinical Microbiology Laboratory, The Baruch Padeh Medical Center, Poriya   | Stern Lab                                                                                                                                           | Stern Lab                                                                                                                                                                                                                                                                                                                                                                                                                                                                                                                                                                                                                                                                                                                                                                                                                                                                                                                                                                                                                                            |
| EPI_ISL_1128789, EPI_ISL_2228542                                                                     | Clinical Microbiology, Infection Prevention and Control                     | Section for Molecular Diagnostics                                                                                                                   | Björn Hallström; Jonas Björkman                                                                                                                                                                                                                                                                                                                                                                                                                                                                                                                                                                                                                                                                                                                                                                                                                                                                                                                                                                                                                      |
| EPI_ISL_2035560, EPI_ISL_2035563, EPI_ISL_2035734, EPI_ISL_2035752, EPI_ISL_2035753, EPI_ISL_2035940 | Clinical Virology                                                           | Clinical Virology                                                                                                                                   | Anissa Chouikha; Henda Triki; Kais Ghedira; Mariem Gdoura; Sondos Haddad; Wasfi Fares; Wasfi Fraes                                                                                                                                                                                                                                                                                                                                                                                                                                                                                                                                                                                                                                                                                                                                                                                                                                                                                                                                                   |
| EPI_ISL_447354                                                                                       | Clinical Virology Unit, Hadassah Hebrew University Medical Center           | Stern Lab                                                                                                                                           | Stern Lab                                                                                                                                                                                                                                                                                                                                                                                                                                                                                                                                                                                                                                                                                                                                                                                                                                                                                                                                                                                                                                            |

|                                                                                                                                                                                                                                                         |                                                                                                                                                                                         |                                                                                                                                                                                         |                                                                                                                                                                                                                                                                                                                                                                                                                                                                                                                                                                                                                                                  |
|---------------------------------------------------------------------------------------------------------------------------------------------------------------------------------------------------------------------------------------------------------|-----------------------------------------------------------------------------------------------------------------------------------------------------------------------------------------|-----------------------------------------------------------------------------------------------------------------------------------------------------------------------------------------|--------------------------------------------------------------------------------------------------------------------------------------------------------------------------------------------------------------------------------------------------------------------------------------------------------------------------------------------------------------------------------------------------------------------------------------------------------------------------------------------------------------------------------------------------------------------------------------------------------------------------------------------------|
| EPI_ISL_2151072                                                                                                                                                                                                                                         | Clínica Meta                                                                                                                                                                            | Instituto de Virología-Universidad El Bosque                                                                                                                                            | Adriana Franco; Andres F. Cardona-Rios; Carolina Coronel-Ruiz; Eliana P. Calvo; Felix G. Delgado; Jaime E. Castellanos; Jhann Andrés Arturo; Jorge E. Osorio; Juan P. Hernandez-Ortiz; Karl A Ciuoderis; L. Johana Madroñero; Lady Lopez; Laura Silvana Pérez; Lilia Bernal-Cepeda; María Fernanda Montañez-Suarez; Maria Stella López; Maria Angélica Calderón-Peláez; Sigrid J. Camacho-Ortega; Sonia P. Bohórquez; Myriam Lucia Velandia-Romero                                                                                                                                                                                               |
| EPI_ISL_1234160, EPI_ISL_2194898                                                                                                                                                                                                                        | Colorado Department of Public Health and Environment                                                                                                                                    | Colorado Department of Public Health and Environment                                                                                                                                    | Alexandria Rosshem; Diana Ir; Emily A. Travanty; Laura Bankers; Molly C. Hetherington-Rauth; Sarah Elizabeth Totten; Shannon Ely; Shannon R. Matzinger                                                                                                                                                                                                                                                                                                                                                                                                                                                                                           |
| EPI_ISL_771337                                                                                                                                                                                                                                          | Colorado Department of Public Health and Environment                                                                                                                                    | Colorado Department of Public Health and Environment                                                                                                                                    | Diana Ir; Emily A. Travanty; Laura Bankers; Molly C. Hetherington-Rauth; Sarah Elizabeth Totten; Shannon Ely; Shannon R. Matzinger                                                                                                                                                                                                                                                                                                                                                                                                                                                                                                               |
| EPI_ISL_1169519                                                                                                                                                                                                                                         | Commonwealth Healthcare Center                                                                                                                                                          | Genomics and Discovery, Respiratory Viruses Branch, Division of Viral Diseases, Centers for Disease Control and Prevention                                                              | Anna Montmayeur; Anna Uehara; Ben L. Rambo-Martin; Clinton R. Paden; Dhvani Batra; Haibin Wang; Jasmine Padilla; Jing Zhang; Justin Lee; Krista Queen; Lori Rowe; Mark Burroughs; Mili Sheth; Peter W. Cook; Rachel Marine; Sarah Nobles; Suxiang Tong; Yan Li; Ying Tao                                                                                                                                                                                                                                                                                                                                                                         |
| EPI_ISL_632262, EPI_ISL_632263, EPI_ISL_632266, EPI_ISL_632267, EPI_ISL_632283, EPI_ISL_682303, EPI_ISL_1660435, EPI_ISL_1660437, EPI_ISL_1660439, EPI_ISL_1660455, EPI_ISL_1660456, EPI_ISL_1660461, EPI_ISL_1660463, EPI_ISL_1660465, EPI_ISL_1660467 | see above                                                                                                                                                                               | Communicable Disease Laboratory, Public Health Directorate                                                                                                                              | AIAbbas, Z.; AlHujairi, Z.; AITaif, Z.; AIWasti, H.; Almoamen, G.; Altaif, Z.; Alwasti, H.; Marhoon, A.                                                                                                                                                                                                                                                                                                                                                                                                                                                                                                                                          |
| EPI_ISL_1017622, EPI_ISL_1080459                                                                                                                                                                                                                        | Connecticut Veterans' Affairs Hospital                                                                                                                                                  | Grubaugh Lab - Yale School of Public Health                                                                                                                                             | Chantal Vogels; Danielle Plank; Isabel Ott; Joseph Fauver; Mary Petrone; Nathan Grubaugh; Shaile Gupta; Tara Alpert                                                                                                                                                                                                                                                                                                                                                                                                                                                                                                                              |
| EPI_ISL_1694623                                                                                                                                                                                                                                         | Croatian Institute for Public Health                                                                                                                                                    | Croatian Institute of Public Health                                                                                                                                                     | Irena Tabain; Ivana Ferenak                                                                                                                                                                                                                                                                                                                                                                                                                                                                                                                                                                                                                      |
| EPI_ISL_1084756, EPI_ISL_1091190, EPI_ISL_1091232                                                                                                                                                                                                       | Croatian Institute of Public Health                                                                                                                                                     | Croatian Institute of Public Health                                                                                                                                                     | Irena Tabain; Ivana Ferenak                                                                                                                                                                                                                                                                                                                                                                                                                                                                                                                                                                                                                      |
| EPI_ISL_454602                                                                                                                                                                                                                                          | Croatian Institute of Public Health                                                                                                                                                     | University of Zagreb, Centre for research and knowledge transfer in biotechnology                                                                                                       | Anamarija Slovic; Irena Tabain; Jelena Ivancic Jelecki; Tatjana Vilibic-Cavlek                                                                                                                                                                                                                                                                                                                                                                                                                                                                                                                                                                   |
| EPI_ISL_1009838                                                                                                                                                                                                                                         | Curative Labs, Inc.                                                                                                                                                                     | Wyoming Public Health Laboratory                                                                                                                                                        | Ashley Norberg; Bailey Bowcutt; Channing Weber; Lynette Gumbleton; Noah Hull; Taylor Fearing; and Wanda Manley                                                                                                                                                                                                                                                                                                                                                                                                                                                                                                                                   |
| EPI_ISL_1753004, EPI_ISL_2134817, EPI_ISL_2176290                                                                                                                                                                                                       | DC Public Health Lab/ Dept. of Forensic Sciences                                                                                                                                        | DC Public Health Lab/ Dept. of Forensic Sciences                                                                                                                                        | Brittany Hamilton; Connie Maza; David Payne; Elizabeth Zelaya; Janis Doss; Jocelyn Hauser; Monica Mann; Sarah Scott; Scott Nguyen                                                                                                                                                                                                                                                                                                                                                                                                                                                                                                                |
| EPI_ISL_1094311                                                                                                                                                                                                                                         | DC Public Health Lab/ Dept. of Forensic Sciences                                                                                                                                        | Respiratory Viruses Branch, Division of Viral Diseases, Centers for Disease Control and Prevention                                                                                      | Anna Montmayeur; Anna Uehara; Ben L. Rambo-Martin; Clinton R. Paden; Dhvani Batra; Haibin Wang; Jasmine Padilla; Jing Zhang; Justin Lee; Krista Queen; Lori Rowe; Mark Burroughs; Mili Sheth; Peter W. Cook; Rachel Marine; Sarah Nobles; Suxiang Tong; Yan Li; Ying Tao                                                                                                                                                                                                                                                                                                                                                                         |
| EPI_ISL_1653815, EPI_ISL_1673343                                                                                                                                                                                                                        | DNA Solution Ltd.                                                                                                                                                                       | Genomic Research Lab, BCSIR                                                                                                                                                             | Abu Sayeed Mohammad Mahmud; Barna Goswami; Eshrar Osman; Iffat Jahan; Kazi Nadim Hasan; Md Firoz Kabir; Md. Abdul Khaleque; Md. Ahasan Habib; Md. Mizanur Rahman; Md. Murshed Hasan Sarkar; Md. Saddam Hossain; Md. Salim Khan; Mohammad Fazle Alam Rabbi; Mohammad Mohi Uddin; Mohammad Samir Uzzaman; Shahina Akter; Sharif Akhteruzzamani; Tanjina Akhter Banu                                                                                                                                                                                                                                                                                |
| EPI_ISL_1511191                                                                                                                                                                                                                                         | DPHL                                                                                                                                                                                    | Delaware Public Health Lab                                                                                                                                                              | Rebecca Savage                                                                                                                                                                                                                                                                                                                                                                                                                                                                                                                                                                                                                                   |
| EPI_ISL_861672                                                                                                                                                                                                                                          | Day Hospital de Ermelino Matarazzo                                                                                                                                                      | Instituto Adolfo Lutz, Interdisciplinary Procedures Center, Strategic Laboratory                                                                                                        | Claudia Regina Gonçalves; Claudio Tavares Sacchi; Erica Valessa Ramos Gomes; Karoline Rodrigues Campos                                                                                                                                                                                                                                                                                                                                                                                                                                                                                                                                           |
| EPI_ISL_2140727                                                                                                                                                                                                                                         | De Rust (Blommenek) Clinic wc DRC                                                                                                                                                       | NHLS/UCT                                                                                                                                                                                | Arash Iranzadeh; Bruna Galvao; Carolyn Williamson; Deelan Doolabh; Diana Hardie; Innocent Mudau; Kruger Marais; Lynn Tyers; Marvin Hsiao; Stephen Korsman                                                                                                                                                                                                                                                                                                                                                                                                                                                                                        |
| EPI_ISL_1137009, EPI_ISL_1137041                                                                                                                                                                                                                        | Delaware Public Health Lab                                                                                                                                                              | Delaware Public Health Lab                                                                                                                                                              | Gregory Hovan                                                                                                                                                                                                                                                                                                                                                                                                                                                                                                                                                                                                                                    |
| EPI_ISL_693692                                                                                                                                                                                                                                          | Delaware Public Health Laboratory                                                                                                                                                       | Delaware Public Health Laboratory                                                                                                                                                       | Gregory Hovan                                                                                                                                                                                                                                                                                                                                                                                                                                                                                                                                                                                                                                    |
| EPI_ISL_985286                                                                                                                                                                                                                                          | Delaware Public Health Laboratory (DPHL)                                                                                                                                                | Delaware Public Health Lab                                                                                                                                                              | Gregory Hovan                                                                                                                                                                                                                                                                                                                                                                                                                                                                                                                                                                                                                                    |
| EPI_ISL_1423764                                                                                                                                                                                                                                         | Departamento de Microbiología, CDB, Hospital Clínic, Barcelona                                                                                                                          | SeqCOVID-SPAIN consortium/IBV(CSIC)                                                                                                                                                     | Aida Peiró and SeqCOVID-SPAIN consortium; Andrea Vergara; Elisa Rubio; Jéssica Navero; Mikel Martínez                                                                                                                                                                                                                                                                                                                                                                                                                                                                                                                                            |
| EPI_ISL_1340751, EPI_ISL_1340764                                                                                                                                                                                                                        | Departamento de Virología, Laboratorio Central de Salud Pública, Avenida Venezuela y Teniente Escurra, Asunción, Paraguay                                                               | Laboratory of Respiratory Viruses and Measles, Oswaldo Cruz Institute, FIOCRUZ                                                                                                          | Alice Sampaio Rocha; Ana Carolina Mendonca; Anna Carolina Paixao; Cynthia Vazquez; Fernando Motta; Luciana Appolinario; Marilda Siqueira on behalf of the FioCruz COVID-19 Genomic Surveillance Network; Paola Resende; Renata Serrano Lopes                                                                                                                                                                                                                                                                                                                                                                                                     |
| EPI_ISL_516924                                                                                                                                                                                                                                          | Department for Molecular Diagnostics, Centre for Medical Microbiology, Institute of Public Health of Montenegro                                                                         | Charite Universitätsmedizin Berlin, Institut für Virologie                                                                                                                              | Barbara Muehlemann; Christian Drosten; Julia Schneider; Jörn Beheim-Schwarzbach; Marija Govedarica and Danijela Vujošević; Talitha Veith; Terry Jones; Victor M Corman                                                                                                                                                                                                                                                                                                                                                                                                                                                                           |
| EPI_ISL_1013604, EPI_ISL_1013605, EPI_ISL_1013607, EPI_ISL_1013611                                                                                                                                                                                      | Department for Molecular Diagnostics, Centre for Medical Microbiology, Institute of Public Health, Montenegro                                                                           | Charité Universitätsmedizin Berlin, Institut für Virologie                                                                                                                              | Barbara Muehlemann; Christian Drosten; Danijela Vujošević; Julia Schneider; Julia Tesch; Jörn Beheim-Schwarzbach; Marija Govedarica; Talitha Veith; Terry Jones; Tobias Bleicker; Victor M Corman                                                                                                                                                                                                                                                                                                                                                                                                                                                |
| EPI_ISL_420144                                                                                                                                                                                                                                          | Department for Virology, Molecular Biology and Genome Research, R. G. Lugar Center for Public Health Research, National Center for Disease Control and Public Health (NCDC) of Georgia. | Department for Virology, Molecular Biology and Genome Research, R. G. Lugar Center for Public Health Research, National Center for Disease Control and Public Health (NCDC) of Georgia. | Adam Kotorashvili; Amiran Gamkrelidze.; Ana Papiakauri; Ann Machablishvili; Anna Kasradze; Davit Tsaguria; Ekaterine Khmaladze; Ekaterine Zangaladze; Ekaterine Zhghenti; Giorgi Tomashvili; Gvantsa Brachveli; Gvantsa Chanturia; Irma Burjanadze; Ketevan Sidamonidze; Khatuna Zakhshvili; Lela Sabadze; Lela Urushadze; Magda Dgebuadze; Maia Alkhashashvili; Mari Gavashelidze; Mariam Zakalashvili; Marine Murtskhaladze; Meri Pantsulaia; Nato Kotaria; Nino Berishvili; Paata Imnadze; Roena Sukhishvili; Tamar Jashishvili; Tata Imnadze; Tea Tvedoradze                                                                                 |
| EPI_ISL_447055, EPI_ISL_447056, EPI_ISL_470877, EPI_ISL_477169, EPI_ISL_754180, EPI_ISL_763062, EPI_ISL_1791026, EPI_ISL_1791038, EPI_ISL_1791050, EPI_ISL_1791064, EPI_ISL_1914785, EPI_ISL_1914938, EPI_ISL_1921859, EPI_ISL_1921878                  | see above                                                                                                                                                                               | Department for Virology, Molecular Biology and Genome Research, R. G. Lugar Center for Public Health Research, National Center for Disease Control and Public Health (NCDC) of Georgia. | Adam Kotorashvili; Amiran Gamkrelidze.; Amiran Gamkrelidze. Submitter information; Ana Papiakauri; Ann Machablishvili; Anna Kasradze; Davit Tsaguria; Ekaterine Khmaladze; Ekaterine Zangaladze; Ekaterine Zhghenti; Giorgi Gogoladze; Giorgi Tomashvili; Gvantsa Brachveli; Gvantsa Chanturia; Irma Burjanadze; Ketevan Sidamonidze; Khatuna Zakhshvili; Lela Sabadze; Lela Urushadze; Magda Dgebuadze; Maia Alkhashashvili; Mari Gavashelidze; Mariam Zakalashvili; Marine Murtskhaladze; Meri Pantsulaia; Nato Kotaria; Nino Berishvili; Paata Imnadze; Roena Sukhishvili; Salome Javashvili; Tamar Jashishvili; Tata Imnadze; Tea Tvedoradze |
| EPI_ISL_632935                                                                                                                                                                                                                                          | Department of Acute Infectious Diseases Control and Prevention, Yunnan Provincial Center for Disease Control and Prevention                                                             | Department of Acute Infectious Diseases Control and Prevention, Yunnan Provincial Center for Disease Control and Prevention                                                             | Jienan Zhou; Meiling Zhang; Senquan Jia; Xiaonan Zhao; Xiaoqing Fu                                                                                                                                                                                                                                                                                                                                                                                                                                                                                                                                                                               |
| EPI_ISL_515090, EPI_ISL_515103                                                                                                                                                                                                                          | Department of Biochemistry, Cell and Molecular Biology                                                                                                                                  | WACCBIP, University of Ghana                                                                                                                                                            | A.K.; Adu, B.; Amenga-Etego; Ampofo, W.; Amuzu; Anang; Arjarquah, A.; Asante, I.; Awandare; Bediako, Y.; Boatemaa, L.; Bonney, E.; Bonney, K.; C.M.; D.S.; Eshun, M.; G.A.; G.B.; J.K.; J.M.; Kotey, E.; Kumordjie, S.; Kyei; L.N.; Magnussen, V.; Morang'a; Mutungi; Ngoi; Quashie, P.; Tei-Maya, F.                                                                                                                                                                                                                                                                                                                                            |
| EPI_ISL_907075, EPI_ISL_956332                                                                                                                                                                                                                          | Department of Biology, University of Basrah                                                                                                                                             | Department of Biology, University of Basrah                                                                                                                                             | A.I.; Abu-Ali; H.F. and Al-Badran; H.M. and Al-Badran; I.F.                                                                                                                                                                                                                                                                                                                                                                                                                                                                                                                                                                                      |
| EPI_ISL_641595, EPI_ISL_678426, EPI_ISL_707755, EPI_ISL_872142, EPI_ISL_1492729                                                                                                                                                                         | Department of Clinical Microbiology                                                                                                                                                     | GIGA Medical Genomics                                                                                                                                                                   | Bouchra Boujemla; Cécile Meex; Keith Durkin; Maria Artesi; Marie-Pierre Hayette; Nathalie Renotte; Pierrette Melin; Raphaël Boreux; Sébastien Bontems; Vincent Bours                                                                                                                                                                                                                                                                                                                                                                                                                                                                             |
| EPI_ISL_417188                                                                                                                                                                                                                                          | Department of Clinical Pathology, Pamela Youde Nethersole Eastern Hospital                                                                                                              | Department of Health Technology and Informatics, Faculty of Health and Social Science, The Hong Kong Polytechnic University                                                             | Alan Ka-Lun WU; Alex Yat-Man HO; Barry Kin-Chung WONG; David Ho-Keung SHUM; Eugene Yuk-Keung TSO; Gilman Kit-Hang SIU; Hiu-Yin LAO; Kam-Tong Yip; Kenneth Siu-Sing LEUNG; Kingsley King-Gee TAM; Kit-Man SIN; Kitty Sau-Chun FUNG; Kwok-Cheung LUNG; Lam-Kwong LEE; Man-Chun CHAN; Ming-Pan CHO; Miranda Chong-Yee YAU; Raymond Wai-To LIU; Sandy Ka-Yee CHAU; Shea Ping YIP; Tak-Lun Que; Timothy Ting-Leung NG; Wai-Shing LEUNG; Wing Cheong YAM; Wing-Kin TO; Yuk-Yung NG                                                                                                                                                                     |
| EPI_ISL_1563631, EPI_ISL_1563632, EPI_ISL_1805696                                                                                                                                                                                                       | Department of Genetic Engineering and Biotechnology, Shahjalal University of Science and Technology                                                                                     | Genomic Research Lab, BCSIR                                                                                                                                                             | Abu Sayeed Mohammad Mahmud; Ajit Ghosh; Barna Goswami; Eshrar Osman; G. M. Nurabi Azad Jewel; Iffat Jahan; Md. Ahasan Habib; Md. Akkas Ali; Md. Asrafu Jahan; Md. Fahmid Hossain Bhuiyan; Md. Hammodul Hoque; Md. Kamrul Islam; Md. Murshed Hasan Sarkar; Md. Nazmul Hasan; Md. Saddam Hossain; Md. Salim Khan; Md. Shamsul Haque Prodhan; Mohammad Samir Uzzaman; Mohammad Samir Uzzaman; Shahina Akter; Tanjina Akhter Banu                                                                                                                                                                                                                    |
| EPI_ISL_1280092, EPI_ISL_1280097, EPI_ISL_1280103, EPI_ISL_1280111                                                                                                                                                                                      | Department of Genetics, Medirex                                                                                                                                                         | Laboratory of Genomics and Bioinformatics, Comenius University Science Park                                                                                                             | Anna Giová; Diana Rusáková; Gabriel Minárik; Jaroslav Budiš; Miroslav Böhmer; Renáta Lukavová; Tatiana Sedláková; Tomáš Szemes; Werner Krampfl                                                                                                                                                                                                                                                                                                                                                                                                                                                                                                   |



|                                                                                                                                                                                                                                                                             |           |                                                                                                                                          |                                                                                                                                                        |                                                                                                                                                                                                                                                                                                                                                                                                                                                                                                                                                                                                                                                                                                                                                                                                |
|-----------------------------------------------------------------------------------------------------------------------------------------------------------------------------------------------------------------------------------------------------------------------------|-----------|------------------------------------------------------------------------------------------------------------------------------------------|--------------------------------------------------------------------------------------------------------------------------------------------------------|------------------------------------------------------------------------------------------------------------------------------------------------------------------------------------------------------------------------------------------------------------------------------------------------------------------------------------------------------------------------------------------------------------------------------------------------------------------------------------------------------------------------------------------------------------------------------------------------------------------------------------------------------------------------------------------------------------------------------------------------------------------------------------------------|
| EPI_ISL_1018121, EPI_ISL_1018304, EPI_ISL_1289436, EPI_ISL_1797619, EPI_ISL_1797620, EPI_ISL_1797621, EPI_ISL_1797622                                                                                                                                                       | see above | Department of Health Technology and Informatics, The Hong Kong Polytechnic University                                                    | Department of Health Technology and Informatics, The Hong Kong Polytechnic University                                                                  | Alan Ka-Lun Wu; Alex Yat-Man Ho; Barry Kin-Chung Wong; Chloe Toi-Mei Chan; David Ho-Keung Shum; Denise Sze-Hang Wong; Gilman Kit-Hang Siu; Hiu-Yin Lao; Hoi-Ching Jim; Jake Siu-Lun Leung; Kam-Tong Yip; Kenneth Siu-Sing Leung; Kingsley King-Gee Tam; Kitty Sau-Chun Fung; Kristine Luk; Lam-Kwong Lee; Miranda Chong-Yee Yau; Sandy Ka-Yee Chau; Shea Ping Yip; Tak-Lun Que; Timothy Ting-Leung Ng; Wing Cheong Yam; Wing-Hei Lo; Wing-Kin To; Yvette Wai-Man Lai                                                                                                                                                                                                                                                                                                                           |
| EPI_ISL_417444                                                                                                                                                                                                                                                              |           | Department of Healthcare Biotechnology, National University of Sciences and Technology (NUST)                                            | Department of Healthcare Biotechnology, National University of Sciences and Technology (NUST)                                                          | Corman; Ghani, E.; H.A.; Janjua; Javed, A.; Niazi; S.K.; Saqib, M.; V.M. and Zohaib, A.                                                                                                                                                                                                                                                                                                                                                                                                                                                                                                                                                                                                                                                                                                        |
| EPI_ISL_1425158, EPI_ISL_1968985                                                                                                                                                                                                                                            |           | Department of Infectious Diseases, Kobe Institute of Health                                                                              | Department of Infectious Diseases, Kobe Institute of Health                                                                                            | Kentaro Itokawa; Makoto Kuroda; Masanori Hashino; Noriko Nakanishi; Rina Tanaka; Ryohei Nomoto; Tomotada Iwamoto; Tsuyoshi Sekizuka                                                                                                                                                                                                                                                                                                                                                                                                                                                                                                                                                                                                                                                            |
| EPI_ISL_411220                                                                                                                                                                                                                                                              |           | Department of Infectious and Tropical Diseases, Bichat Claude Bernard Hospital, Paris                                                    | Laboratoire Virpath, CIRI U111, UCBL1, INSERM, CNRS, ENS Lyon                                                                                          | Alexandre Gaymard; Aurélien Traversier; Bruno Lina; Julien Fouret; Manuel Rosa-Calatrava; Olivier Terrier; Xavier Lescure; Yazdan Yazdanpanah                                                                                                                                                                                                                                                                                                                                                                                                                                                                                                                                                                                                                                                  |
| EPI_ISL_1495823, EPI_ISL_2232762                                                                                                                                                                                                                                            |           | Department of Laboratory Medicine, Division of Clinical Virology, University of Medicine, Vienna                                         | Berghaler laboratory, CeMM Research Center for Molecular Medicine of the Austrian Academy of Sciences                                                  | Andreas Berghaler; Anna Schedl; Bekir Erguner; Benedikt Agerer; Christoph Bock; Fabian Amman; Jan Laine; Lukas Endler; Maelle Le Moing; Martin Senekowitsch; Michael Schuster; Petr Triska; Thomas Penz                                                                                                                                                                                                                                                                                                                                                                                                                                                                                                                                                                                        |
| EPI_ISL_422413, EPI_ISL_422421, EPI_ISL_534336, EPI_ISL_693306, EPI_ISL_738064, EPI_ISL_872599, EPI_ISL_1020315, EPI_ISL_1020316, EPI_ISL_1667469, EPI_ISL_1667471, EPI_ISL_1667472, EPI_ISL_1667474, EPI_ISL_1667475                                                       | see above | Department of Laboratory Medicine, National Taiwan University Hospital                                                                   | Microbial Genomics Core Lab, National Taiwan University Centers of Genomic and Precision Medicine                                                      | Chiao-Ling Li; Pei-Jer Chen; Shan-Chwen Chang; Shiou-Hwei Yeh; Sui-Yuan Chang; Ya-Yun Lai; You-Yu Lin                                                                                                                                                                                                                                                                                                                                                                                                                                                                                                                                                                                                                                                                                          |
| EPI_ISL_648744                                                                                                                                                                                                                                                              |           | Department of Laboratory Medicine, Tan Tock Seng Hospital                                                                                | Department of Laboratory Medicine, Tan Tock Seng Hospital                                                                                              | Barkham TMS; Chen YYC; Li C; Lim JX; Maurer-Stroh S; Nagarajan N; Sessions OM; Tang WY; Zair X                                                                                                                                                                                                                                                                                                                                                                                                                                                                                                                                                                                                                                                                                                 |
| EPI_ISL_2007377                                                                                                                                                                                                                                                             |           | Department of Medical Microbiology - section Molde, Molde Hospital                                                                       | Norwegian Institute of Public Health, Department of Virology                                                                                           | Atiya R Ali; Debech Nadia; Engebretsen Serina Beate; Garcia Llorente Ignacio; Hilde Elshaug; Hilde Vollan; Jon Bråte; Kamilla Heddeland Instefjord; Karoline Bragstad; Kathrine Stene-Johansen; Marie Paulsen Madsen; Olav Hungnes; Pedersen Benedikte Nevjen; Rasmus Riis Kopperud                                                                                                                                                                                                                                                                                                                                                                                                                                                                                                            |
| EPI_ISL_861722                                                                                                                                                                                                                                                              |           | Department of Medical Microbiology, Hospital Pengajar Universiti Putra Malaysia                                                          | Malaysia Genome Institute                                                                                                                              | Avisha Richards; Azrin Ahmad; Enizza Kasim; Hui-Yee Chee; Irni Suhayu Sopian; Mohd Faizal Abu Bakar; Mohd Noor Mat Isa; Muhammad MI; Narcisse Joseph; Nor Azfa Johari; Nor Zahrin Hasran; Nurhezreen Md Iqbal; Shamsidar Sopie; Siti Noraini Othman; Syafinaz Amin-Nordin; Yusuf Muhammad Noor                                                                                                                                                                                                                                                                                                                                                                                                                                                                                                 |
| EPI_ISL_501189, EPI_ISL_501200                                                                                                                                                                                                                                              |           | Department of Medical Microbiology, University Malaya Medical Centre                                                                     | Department of Medical Microbiology, Faculty of Medicine, University of Malaya                                                                          | I-Ching SAM; Jennifer Chong; University Malaya Medical Centre COVID Team; Yoke Fun CHAN; Yoong Min CHONG                                                                                                                                                                                                                                                                                                                                                                                                                                                                                                                                                                                                                                                                                       |
| EPI_ISL_512844                                                                                                                                                                                                                                                              |           | Department of Medical Research                                                                                                           | DMR_Myanmar                                                                                                                                            | Aung Kyaw Kyaw; Aung Zaw Latt; Hlaing Myat Thu; Hnin Ohnmar Soe; Htin Lin; Kay Thi Aye; Lai Lai San; Myat Htut Nyunt; Nan Aye Thida Oo; Ni Ni Zaw; Phyu Win Ei; Su Mon Win; Theingi Win Myat; Wah Wah Aung; Yi Yi Kyaw; Zaw Than Htun                                                                                                                                                                                                                                                                                                                                                                                                                                                                                                                                                          |
| EPI_ISL_476881                                                                                                                                                                                                                                                              |           | Department of MicroBiology, Government Medical College, Surat                                                                            | Gujarat Biotechnology Research Centre                                                                                                                  | A M Kadri; Afzal Ansari; Amit gamit; Apurvashih Puvar; Chaitanya Joshi; Dinesh Kumar; Harsh Bakshi; Janvi Raval; Komal Patel; Labdhi Pandya; Madhvi Joshi; Maharshi Pandya; Monika Gandhi; Naresh Chauhan; Nidhi Patel; Nikha Trivedi; Nitin Savaliya; Pinal Trivedi; R D Dixit; Raghawendra Kumar; Summajiya Mullan; Zarna Patel; Zuber Saiyed                                                                                                                                                                                                                                                                                                                                                                                                                                                |
| EPI_ISL_2235290                                                                                                                                                                                                                                                             |           | Department of Microbiology, AHEPA University Hospital                                                                                    | Institute of Applied Biosciences, Centre for Research and Technology Hellas                                                                            | Anastasia Chatzimidriou et al.                                                                                                                                                                                                                                                                                                                                                                                                                                                                                                                                                                                                                                                                                                                                                                 |
| EPI_ISL_1027638, EPI_ISL_1027645, EPI_ISL_1027651                                                                                                                                                                                                                           |           | Department of Microbiology, National Institute for Public Health of Kosova                                                               | Charité Universitätsmedizin Berlin, Institut für Virologie                                                                                             | Barbara Mühlemann; Christian Drosten; Donjeta Hajdari; Julia Schneider; Jörn Beheim-Schwarzbach; Talitha Veith; Terry Jones; Victor M Corman; Xhevat Jakupi; Zana Deva                                                                                                                                                                                                                                                                                                                                                                                                                                                                                                                                                                                                                         |
| EPI_ISL_497784, EPI_ISL_498270, EPI_ISL_498271, EPI_ISL_1034661, EPI_ISL_1197084, EPI_ISL_1273444                                                                                                                                                                           |           | Department of Microbiology, The University of Hong Kong                                                                                  | Department of Microbiology, The University of Hong Kong                                                                                                | Kelvin K.W. To; Kwok-Yung Yuen                                                                                                                                                                                                                                                                                                                                                                                                                                                                                                                                                                                                                                                                                                                                                                 |
| EPI_ISL_1660475                                                                                                                                                                                                                                                             |           | Department of Microbiology, The University of Hong Kong                                                                                  | The University of Hong Kong Department of Microbiology                                                                                                 | Kelvin K.W. To; Kwok-Yung Yuen                                                                                                                                                                                                                                                                                                                                                                                                                                                                                                                                                                                                                                                                                                                                                                 |
| EPI_ISL_1008285, EPI_ISL_1008286, EPI_ISL_2137175                                                                                                                                                                                                                           |           | Department of Microbiology, University Innsbruck                                                                                         | Berghaler laboratory, CeMM Research Center for Molecular Medicine of the Austrian Academy of Sciences                                                  | Andreas Berghaler; Anna Schedl; Bekir Erguner; Benedikt Agerer; Christoph Bock; Fabian Amman; Jan Laine; Lukas Endler; Maelle Le Moing; Martin Senekowitsch; Michael Schuster; Petr Triska; Thomas Penz                                                                                                                                                                                                                                                                                                                                                                                                                                                                                                                                                                                        |
| EPI_ISL_463747, EPI_ISL_463748, EPI_ISL_1164627, EPI_ISL_1164634, EPI_ISL_1164665, EPI_ISL_1164717, EPI_ISL_1164728, EPI_ISL_1164731, EPI_ISL_1164733, EPI_ISL_1164739, EPI_ISL_1164740, EPI_ISL_1164746                                                                    | see above | Department of Molecular Virology, Cyprus Institute of Neurology and Genetics                                                             | Department of Molecular Virology, Cyprus Institute of Neurology and Genetics                                                                           | Anastasis Oulas; Andreas Hadjisavvas; Christina Christodoulou; Christina Tryfonos; Dana Koptides; Denise Alexandrou; George Krashias; George Spyrou; Jan Richter; Maria Loizidou; Mihalis Panayiotidis; Olga Kalakouta; Pavlos Fanis; Stavros Bashiardes                                                                                                                                                                                                                                                                                                                                                                                                                                                                                                                                       |
| EPI_ISL_594187                                                                                                                                                                                                                                                              |           | Department of Pathology, School of Medicine, Imam Khomeini Hospital, Tehran University of Medical Sciences                               | Genetics Research Center, University of Social Welfare and Rehabilitation Sciences                                                                     | Ali Jafarpour; Alireza Abdollahi; Azam Ghaziasad; Azam Ghaziasadi; Azar Hadadi; Hossein Najmabadi; Khadijeh Jalalvand; Kimia Kahrizi; Marzieh Mohseni; Reza Najafipour; Saber Soltani; Seyed Mohammad Jazayeri; Seyedeih elham Mortazavi; Zohreh Fattahi                                                                                                                                                                                                                                                                                                                                                                                                                                                                                                                                       |
| EPI_ISL_1657102, EPI_ISL_1969989, EPI_ISL_2099856, EPI_ISL_2099862, EPI_ISL_2099872, EPI_ISL_2099878, EPI_ISL_2099880                                                                                                                                                       | see above | Department of Public Health Bucharest                                                                                                    | National Institute of Infectious Diseases-Prof. Dr. Matei Bals Molecular Diagnostics Laboratory                                                        | Andreea Tudor; Corina Casangiu; Dan Otelea; Leontina Banica; Marius Surleac; Ovidiu Vlaicu; Simona Paraschiv                                                                                                                                                                                                                                                                                                                                                                                                                                                                                                                                                                                                                                                                                   |
| EPI_ISL_1795792                                                                                                                                                                                                                                                             |           | Department of Public Health Microbiology Ljubljana, National Laboratory for Health, Environment and Food                                 | Department of Public Health Microbiology Ljubljana, National Laboratory for Health, Environment and Food                                               | José Gonçalves; Katarina Prosenec; Martin Bosilj; Metka Paragi; Natasa Berginc; Tom Koritnik                                                                                                                                                                                                                                                                                                                                                                                                                                                                                                                                                                                                                                                                                                   |
| EPI_ISL_576146                                                                                                                                                                                                                                                              |           | Department of Respiratory & Other Viral Infections of L.V. Gromashevsky Institute of Epidemiology & Infectious Diseases NAMS of Ukraine  | Department of Respiratory & Other Viral Infections of L.V. Gromashevsky Institute of Epidemiology & Infectious Diseases NAMS of Ukraine, JSC "Farmak"  | Alla Mironenko; Ihor Kravchuk; Larysa Radchenko; Liudmyla Bolotova; Nataliia Teteriuk                                                                                                                                                                                                                                                                                                                                                                                                                                                                                                                                                                                                                                                                                                          |
| EPI_ISL_582511, EPI_ISL_1121990                                                                                                                                                                                                                                             |           | Department of Respiratory and other Viral Infections of L.V.Gromashevsky Institute of Epidemiology & Infectious Diseases NAMS of Ukraine | Department of Respiratory and other Viral Infections of L.V.Gromashevsky Institute of Epidemiology & Infectious Diseases NAMS of Ukraine, JSC "Farmak" | Alla Mironenko; Andriy Goy; Ihor Kravchuk; Larysa Radchenko; Ludmyla Bolotova; Nataliia Teteriuk                                                                                                                                                                                                                                                                                                                                                                                                                                                                                                                                                                                                                                                                                               |
| EPI_ISL_450200, EPI_ISL_1406393, EPI_ISL_1711669, EPI_ISL_1732172, EPI_ISL_1732274                                                                                                                                                                                          |           | Department of Virology                                                                                                                   | Department of Virology                                                                                                                                 | Aamer Ikram; Abdul Ahad; Ackermann, N.; Adnan Haider; Ammar Amjad; Antwerpen, M.; Austin Leach; Bengs, K.; Berger, A.; Boehm, S.; Boehmer; Boender; Buchholz, U.; Cai, W.; Corman, D.V.; Dangel, A.; Drosten, C.; Eberle, U.; Fingerle, V.; Grah, A.; Haas, W.; Hamouda, O.; Hoch, M.; Hoermansdorfer, S.; Ippisch, S.; Joel Montgomery; John Kléna; Jones; Katz, K.; Ketan Patel; Konrad, R.; Liebi, B.; M.M.; Marosevic; Massab Umair; Melissa Mobley; Muehlemann, B.; Muhammad Salman; Muller, N.; Nazish Badar; Poertner, K.; Protzer, U.; Qasim Ali; Reich, A.; Rexroth, U.; Sana Tamim; Schneider, J.; Shannon Whitmer; Sing, A.; T.C.; T.S.; Treis, B.; V.M.; Veith, T.; Walter, M.; Wicklein, B.; Woelfel, R.; Woudenberg, T.; Zaira Rehman; Zapf, A.; Zeitmann, N.; an der Heiden, M. |
| EPI_ISL_407084                                                                                                                                                                                                                                                              |           | Department of Virology III, National Institute of Infectious Diseases                                                                    | Pathogen Genomics Center, National Institute of Infectious Diseases                                                                                    | Kazuya Shirato; Makoto Kuroda; Makoto Takeda; Naganori Nao; Shinji Watanabe; Shutoku Matsuyama; Tsuyoshi Sekizuka                                                                                                                                                                                                                                                                                                                                                                                                                                                                                                                                                                                                                                                                              |
| EPI_ISL_481721, EPI_ISL_737039, EPI_ISL_756291, EPI_ISL_1082227, EPI_ISL_1233213, EPI_ISL_1240964, EPI_ISL_1279082, EPI_ISL_1595784, EPI_ISL_1595792, EPI_ISL_1841444, EPI_ISL_1841667, EPI_ISL_1841752, EPI_ISL_1842689, EPI_ISL_2031134, EPI_ISL_2031148                  | see above | Department of Virology and Immunology, University of Helsinki and Helsinki University Hospital, Huslab Finland                           | Department of Virology, Faculty of Medicine, University of Helsinki, Helsinki, Finland                                                                 | Essi Korhonen; Fathiah Zakhram; Hanna Jarva; Hanna Liimatainen; Hannimari Kallio-Kokko; Harri Kangas; Hussein Alburkat; Jenni Virtanen; Maija Lappalainen; Maija Suvanto; Mert Erdin; Olli Vapalahti; Pekka Elonen; Phuoc Truong; Ravi Kant; Sari Hannula; Satu Kurkela; Teemu Smura; fathiah Zakhram                                                                                                                                                                                                                                                                                                                                                                                                                                                                                          |
| EPI_ISL_468163                                                                                                                                                                                                                                                              |           | Department of Virology, Public Health Laboratories Division, National Institute of Health                                                | Department of Virology, Public Health Laboratories Division, National Institute of Health                                                              | Aamer Ikram; Adnan Khurshid; John Kléna; Massab Umair; Muhammad Salman; Nazish Badar; Shannon Whitmer                                                                                                                                                                                                                                                                                                                                                                                                                                                                                                                                                                                                                                                                                          |
| EPI_ISL_926666, EPI_ISL_972084, EPI_ISL_972090, EPI_ISL_1025059, EPI_ISL_1861642, EPI_ISL_1863340, EPI_ISL_1863644, EPI_ISL_1866659, EPI_ISL_1868873, EPI_ISL_1872019, EPI_ISL_1885042, EPI_ISL_1888867, EPI_ISL_2026811, EPI_ISL_2174375, EPI_ISL_2174447, EPI_ISL_2177765 | see above | Department of Virus and Microbiological Special Diagnostics, Statens Serum Institut, Copenhagen, Denmark                                 | Aalborg University                                                                                                                                     | Danish Covid-19 Genome Consortium                                                                                                                                                                                                                                                                                                                                                                                                                                                                                                                                                                                                                                                                                                                                                              |
| EPI_ISL_747738                                                                                                                                                                                                                                                              |           | Department of Virus and Microbiological Special Diagnostics,                                                                             | Albertsen Lab, Department of Chemistry and Bioscience,                                                                                                 | Danish Covid-19 Genome Consortium                                                                                                                                                                                                                                                                                                                                                                                                                                                                                                                                                                                                                                                                                                                                                              |

|                                                                                                                                                                                                                                                                                                                                                                                                                                                                                                                                                                                                                                                                                                                                                                                                                                                                                                                                                                                                                                                                                                                                                                                                                                                                                                                                                                                                                                                                                                                                                                                                                                                                                                                                                                                                                                                                                                                                                                                                                                                                                                                                                                                                                                                                                                                                                                                                                                                                                                                                                                                                                                                                                                                                                                                                                                                                                                                                                                                                                                                                                    |                                                                                                                                                                                            |                                                                                                                                                                                           |                                                                                                                                                                                                                                                                                                                                                                                                                                                                                                                                                                                                                                                                                                                                                                              |
|------------------------------------------------------------------------------------------------------------------------------------------------------------------------------------------------------------------------------------------------------------------------------------------------------------------------------------------------------------------------------------------------------------------------------------------------------------------------------------------------------------------------------------------------------------------------------------------------------------------------------------------------------------------------------------------------------------------------------------------------------------------------------------------------------------------------------------------------------------------------------------------------------------------------------------------------------------------------------------------------------------------------------------------------------------------------------------------------------------------------------------------------------------------------------------------------------------------------------------------------------------------------------------------------------------------------------------------------------------------------------------------------------------------------------------------------------------------------------------------------------------------------------------------------------------------------------------------------------------------------------------------------------------------------------------------------------------------------------------------------------------------------------------------------------------------------------------------------------------------------------------------------------------------------------------------------------------------------------------------------------------------------------------------------------------------------------------------------------------------------------------------------------------------------------------------------------------------------------------------------------------------------------------------------------------------------------------------------------------------------------------------------------------------------------------------------------------------------------------------------------------------------------------------------------------------------------------------------------------------------------------------------------------------------------------------------------------------------------------------------------------------------------------------------------------------------------------------------------------------------------------------------------------------------------------------------------------------------------------------------------------------------------------------------------------------------------------|--------------------------------------------------------------------------------------------------------------------------------------------------------------------------------------------|-------------------------------------------------------------------------------------------------------------------------------------------------------------------------------------------|------------------------------------------------------------------------------------------------------------------------------------------------------------------------------------------------------------------------------------------------------------------------------------------------------------------------------------------------------------------------------------------------------------------------------------------------------------------------------------------------------------------------------------------------------------------------------------------------------------------------------------------------------------------------------------------------------------------------------------------------------------------------------|
| EPI_ISL_437654                                                                                                                                                                                                                                                                                                                                                                                                                                                                                                                                                                                                                                                                                                                                                                                                                                                                                                                                                                                                                                                                                                                                                                                                                                                                                                                                                                                                                                                                                                                                                                                                                                                                                                                                                                                                                                                                                                                                                                                                                                                                                                                                                                                                                                                                                                                                                                                                                                                                                                                                                                                                                                                                                                                                                                                                                                                                                                                                                                                                                                                                     | Statens Serum Institut, Copenhagen, Denmark<br>Department of Virus and Microbiological Special Diagnostics, Statens Serum Institut, Copenhagen, Denmark, Artillerivej 5, 2300 Copenhagen S | Aalborg University, Denmark<br>Albertsen lab, Department of Chemistry and Bioscience, Aalborg University, Denmark                                                                         | Rasmus Kirkegaard                                                                                                                                                                                                                                                                                                                                                                                                                                                                                                                                                                                                                                                                                                                                                            |
| EPI_ISL_614404, EPI_ISL_615282, EPI_ISL_621257                                                                                                                                                                                                                                                                                                                                                                                                                                                                                                                                                                                                                                                                                                                                                                                                                                                                                                                                                                                                                                                                                                                                                                                                                                                                                                                                                                                                                                                                                                                                                                                                                                                                                                                                                                                                                                                                                                                                                                                                                                                                                                                                                                                                                                                                                                                                                                                                                                                                                                                                                                                                                                                                                                                                                                                                                                                                                                                                                                                                                                     | Department of Virus and Microbiological Special Diagnostics, Statens Serum Institut, Denmark                                                                                               | Albertsen lab, Department of Chemistry and Bioscience, Aalborg University, Denmark                                                                                                        | Danish Covid-19 Genome Consortia                                                                                                                                                                                                                                                                                                                                                                                                                                                                                                                                                                                                                                                                                                                                             |
| EPI_ISL_416142                                                                                                                                                                                                                                                                                                                                                                                                                                                                                                                                                                                                                                                                                                                                                                                                                                                                                                                                                                                                                                                                                                                                                                                                                                                                                                                                                                                                                                                                                                                                                                                                                                                                                                                                                                                                                                                                                                                                                                                                                                                                                                                                                                                                                                                                                                                                                                                                                                                                                                                                                                                                                                                                                                                                                                                                                                                                                                                                                                                                                                                                     | Department of Virus and Microbiological Special diagnostics, Statens Serum Institut, Copenhagen, Denmark.                                                                                  | Statens Serum Institute                                                                                                                                                                   | Anders Fomsgaard; Maiken Worsoe Rosenstjerne; Morten Rasmussen                                                                                                                                                                                                                                                                                                                                                                                                                                                                                                                                                                                                                                                                                                               |
| EPI_ISL_1994942, EPI_ISL_2146981, EPI_ISL_2146984, EPI_ISL_2146986                                                                                                                                                                                                                                                                                                                                                                                                                                                                                                                                                                                                                                                                                                                                                                                                                                                                                                                                                                                                                                                                                                                                                                                                                                                                                                                                                                                                                                                                                                                                                                                                                                                                                                                                                                                                                                                                                                                                                                                                                                                                                                                                                                                                                                                                                                                                                                                                                                                                                                                                                                                                                                                                                                                                                                                                                                                                                                                                                                                                                 | Dept. of Microbiology and Infection Control, Akershus University Hospital HF                                                                                                               | Dept. of Microbiology and Infection Control, Akershus University Hospital HF                                                                                                              | Alexander Hesselberg Løvestad; Hege Vangstein Aamot                                                                                                                                                                                                                                                                                                                                                                                                                                                                                                                                                                                                                                                                                                                          |
| EPI_ISL_410531                                                                                                                                                                                                                                                                                                                                                                                                                                                                                                                                                                                                                                                                                                                                                                                                                                                                                                                                                                                                                                                                                                                                                                                                                                                                                                                                                                                                                                                                                                                                                                                                                                                                                                                                                                                                                                                                                                                                                                                                                                                                                                                                                                                                                                                                                                                                                                                                                                                                                                                                                                                                                                                                                                                                                                                                                                                                                                                                                                                                                                                                     | Dept. of Pathology, National Institute of Infectious Diseases                                                                                                                              | Pathogen Genomics Center, National Institute of Infectious Diseases                                                                                                                       | Harutaka Katano; Hideki Hasegawa; Kazuya Shirato; Makoto Kuroda; Makoto Takeda; Motoi Suzuki; Naganori Nao; Shutoku Matsuyama; Tadaki Suzuki; Takaji Wakita; Tsuyoshi Sekizuka                                                                                                                                                                                                                                                                                                                                                                                                                                                                                                                                                                                               |
| EPI_ISL_774881, EPI_ISL_774909, EPI_ISL_774927, EPI_ISL_774929                                                                                                                                                                                                                                                                                                                                                                                                                                                                                                                                                                                                                                                                                                                                                                                                                                                                                                                                                                                                                                                                                                                                                                                                                                                                                                                                                                                                                                                                                                                                                                                                                                                                                                                                                                                                                                                                                                                                                                                                                                                                                                                                                                                                                                                                                                                                                                                                                                                                                                                                                                                                                                                                                                                                                                                                                                                                                                                                                                                                                     | Designated Reference Institute for Chemical Measurements (DRICM)                                                                                                                           | DNA SOLUTION LTD.                                                                                                                                                                         | Abdul Khaleque; Abu Sufian; Hasan Ul Haider; Jannatun Naima; Kazi Nadim Hasan; MSM Chowdhury; Mala Khan; Mamudul Hasan Razu; Md. Imran Khan; Mizanur Rahman; Mohammad Fazle Alam Rabbi                                                                                                                                                                                                                                                                                                                                                                                                                                                                                                                                                                                       |
| EPI_ISL_2171041, EPI_ISL_2171267                                                                                                                                                                                                                                                                                                                                                                                                                                                                                                                                                                                                                                                                                                                                                                                                                                                                                                                                                                                                                                                                                                                                                                                                                                                                                                                                                                                                                                                                                                                                                                                                                                                                                                                                                                                                                                                                                                                                                                                                                                                                                                                                                                                                                                                                                                                                                                                                                                                                                                                                                                                                                                                                                                                                                                                                                                                                                                                                                                                                                                                   | Dhulikhel Hospital, Kathmandu University Hospital                                                                                                                                          | Molecular and Genomics Research Lab, Dhulikhel Hospital, Kathmandu University Hospital                                                                                                    | Dipesh Tamrakar; Manu Vanaerschot; Meghnath Dhimal; Navin Adhikari; Nishan Katuwal; Pradip Gyanwali; Rajeev Shrestha; Saroj Bhattarai; Surendra Kumar Madhup                                                                                                                                                                                                                                                                                                                                                                                                                                                                                                                                                                                                                 |
| EPI_ISL_1447344, EPI_ISL_1533061                                                                                                                                                                                                                                                                                                                                                                                                                                                                                                                                                                                                                                                                                                                                                                                                                                                                                                                                                                                                                                                                                                                                                                                                                                                                                                                                                                                                                                                                                                                                                                                                                                                                                                                                                                                                                                                                                                                                                                                                                                                                                                                                                                                                                                                                                                                                                                                                                                                                                                                                                                                                                                                                                                                                                                                                                                                                                                                                                                                                                                                   | Diagnostic and Research Center of Infectious Diseases, Medical Faculty, Andalas University                                                                                                 | Diagnostic and Research Center of Infectious Diseases, Medical Faculty, Andalas University                                                                                                | Andani Eka Putra; Ayu Novita Trisnawati; Dede Rahman Agustian; Desmawati; Dessy Arisanty; Fauzul Azhim; Gestina Aliska; Ikhwan R. Sudji; Juane Plantika Menra; Linoesfa; Mutia Lalaini; Nia Ayuni Putri; Nita Afriani; SM Rezvi; Sekar Asri Tresnaningtyas; Siskali Fahma; Syafrizayanti; Syandrez Prima Putra; Yolani Syaputri                                                                                                                                                                                                                                                                                                                                                                                                                                              |
| EPI_ISL_2246976                                                                                                                                                                                                                                                                                                                                                                                                                                                                                                                                                                                                                                                                                                                                                                                                                                                                                                                                                                                                                                                                                                                                                                                                                                                                                                                                                                                                                                                                                                                                                                                                                                                                                                                                                                                                                                                                                                                                                                                                                                                                                                                                                                                                                                                                                                                                                                                                                                                                                                                                                                                                                                                                                                                                                                                                                                                                                                                                                                                                                                                                    | Diagnostyka Sp. Z o.o.                                                                                                                                                                     | 1. Academic Center for Pathomorphological and Genetic-Molecular Diagnostics Ltd, Bialystok, Poland 2. National Institute of Public Health - National Institute of Hygiene, Warsaw, Poland | Anetta Sulewska; Jacek Nikliski; Janusz Dzcio; Joanna Kiluk; Katarzyna Zacharczuk; Konrad Raczkowski; Magdalena Nowakowska; Magorzata Sadkowska-Todys; Piotr Karabowicz; Piotr Majewski; Przemyslaw Biecek. Joanna Resze; Radosaw Charkiewicz; Tomasz Wokowicz                                                                                                                                                                                                                                                                                                                                                                                                                                                                                                               |
| EPI_ISL_1469272                                                                                                                                                                                                                                                                                                                                                                                                                                                                                                                                                                                                                                                                                                                                                                                                                                                                                                                                                                                                                                                                                                                                                                                                                                                                                                                                                                                                                                                                                                                                                                                                                                                                                                                                                                                                                                                                                                                                                                                                                                                                                                                                                                                                                                                                                                                                                                                                                                                                                                                                                                                                                                                                                                                                                                                                                                                                                                                                                                                                                                                                    | Dinas Kesehatan Kabupaten Ponorogo                                                                                                                                                         | National Institute of Health Research and Development                                                                                                                                     | Arie Ardiansyah Nugraha; Hana Apsari Pawestri; Hartanti Dian Ikawati; Kartika Dewi Puspa; Krisna Pangesti; Nelly Puspandari; Subangkit; Vivi Setiawaty                                                                                                                                                                                                                                                                                                                                                                                                                                                                                                                                                                                                                       |
| EPI_ISL_2047531                                                                                                                                                                                                                                                                                                                                                                                                                                                                                                                                                                                                                                                                                                                                                                                                                                                                                                                                                                                                                                                                                                                                                                                                                                                                                                                                                                                                                                                                                                                                                                                                                                                                                                                                                                                                                                                                                                                                                                                                                                                                                                                                                                                                                                                                                                                                                                                                                                                                                                                                                                                                                                                                                                                                                                                                                                                                                                                                                                                                                                                                    | Dinas Kesehatan Kota Denpasar                                                                                                                                                              | National Institute of Health Research and Development                                                                                                                                     | Arie Ardiansyah Nugraha; Hana Apsari Pawestri; Hartanti Dian Ikawati; Kartika Dewi Puspa; Krisna Pangesti; Nelly Puspandari; Subangkit; Triyani Soekarso; Vivi Setiawaty                                                                                                                                                                                                                                                                                                                                                                                                                                                                                                                                                                                                     |
| EPI_ISL_1303371                                                                                                                                                                                                                                                                                                                                                                                                                                                                                                                                                                                                                                                                                                                                                                                                                                                                                                                                                                                                                                                                                                                                                                                                                                                                                                                                                                                                                                                                                                                                                                                                                                                                                                                                                                                                                                                                                                                                                                                                                                                                                                                                                                                                                                                                                                                                                                                                                                                                                                                                                                                                                                                                                                                                                                                                                                                                                                                                                                                                                                                                    | Dirección de Sanidad Policia Nacional                                                                                                                                                      | Instituto Nacional de Salud- Dirección de Investigación en Salud Pública                                                                                                                  | Carlos Franco-Muñoz; Carmen Osorio; Diana Malo; Diego A. Álvarez-Díaz; Diego Andrés Prada; Gerardo Santamaría; Hector Alejandro Ruiz-Moreno; Jhonnatan Reales-González; Juan Camilo Martínez; Julian Naizaque; Katherine Laiton-Donato; Lisseth Pardo; Magdalena Wiesner; Marcela Mercado-Reyes; Maria T. Herrera-Sepúlveda; Marta Lopez Blanco; Martha Lucia Ospina Martinez; Sergio Gomez; Sheryll Corchuelo; Angela Alarcon Cruz                                                                                                                                                                                                                                                                                                                                          |
| EPI_ISL_1469560                                                                                                                                                                                                                                                                                                                                                                                                                                                                                                                                                                                                                                                                                                                                                                                                                                                                                                                                                                                                                                                                                                                                                                                                                                                                                                                                                                                                                                                                                                                                                                                                                                                                                                                                                                                                                                                                                                                                                                                                                                                                                                                                                                                                                                                                                                                                                                                                                                                                                                                                                                                                                                                                                                                                                                                                                                                                                                                                                                                                                                                                    | Diretoria de Vigilância em Saúde                                                                                                                                                           | Epiclin                                                                                                                                                                                   | Ana Paula Muterle; Carolina Comerlato; Eliana Márcia Da Ros Wendland; Fernando Hayashi Sant'Anna; Janira Prichula; Juliana Comerlato                                                                                                                                                                                                                                                                                                                                                                                                                                                                                                                                                                                                                                         |
| EPI_ISL_759996, EPI_ISL_850193, EPI_ISL_994792, EPI_ISL_995773, EPI_ISL_1063724, EPI_ISL_1138902, EPI_ISL_1138943, EPI_ISL_1165065, EPI_ISL_1209424, EPI_ISL_1209425, EPI_ISL_1252398, EPI_ISL_1315345, EPI_ISL_1489654, EPI_ISL_1490007, EPI_ISL_1490030, EPI_ISL_1490164, EPI_ISL_1934728, EPI_ISL_1936549, EPI_ISL_2161038, EPI_ISL_2161135                                                                                                                                                                                                                                                                                                                                                                                                                                                                                                                                                                                                                                                                                                                                                                                                                                                                                                                                                                                                                                                                                                                                                                                                                                                                                                                                                                                                                                                                                                                                                                                                                                                                                                                                                                                                                                                                                                                                                                                                                                                                                                                                                                                                                                                                                                                                                                                                                                                                                                                                                                                                                                                                                                                                     | Division of Emerging Infectious Diseases, Bureau of Infectious Diseases Diagnosis Control, Korea Disease Control and Prevention Agency                                                     | Division of Emerging Infectious Diseases, Bureau of Infectious Diseases Diagnosis Control, Korea Disease Control and Prevention Agency                                                    | Ae Kyung Park; Chae Young Lee; Chaeyoung Lee; Eun-Jin Kim; Heui Man Kim; Il-Hwan Kim; Jeong-Ah Kim; Jeong-Ah Kim; Jeong-Min Kim; Jin Sun No; Namjoo Lee; Sang Hee Woo                                                                                                                                                                                                                                                                                                                                                                                                                                                                                                                                                                                                        |
| see above                                                                                                                                                                                                                                                                                                                                                                                                                                                                                                                                                                                                                                                                                                                                                                                                                                                                                                                                                                                                                                                                                                                                                                                                                                                                                                                                                                                                                                                                                                                                                                                                                                                                                                                                                                                                                                                                                                                                                                                                                                                                                                                                                                                                                                                                                                                                                                                                                                                                                                                                                                                                                                                                                                                                                                                                                                                                                                                                                                                                                                                                          | Division of Epidemiology                                                                                                                                                                   | COVID-19 Network Investigations (CONI) Alliance                                                                                                                                           | Angkana Huang; Anthony R. Jones; Araya Keskesorn; Aporn Wangwiwatsin; Arthicha Wongkumma; Atika Awaee; Bhakbhoon Panthan; Chattiwuti Tanabat; Chodmanee Sukunpun; Chonticha Klungtong; Duangkamon Loesbanlueacha; Ekawat Pasomsueb; Elizabeth Batty; Insee Semsorn; Janjira Thaipadungpanit; Juraiwan Ungsathaphornphon; Kamonchanok Chuayjan; Kawinna Kerdsalung; Khajohn Joonlasak; Kingkan Rakmanee; Krittikorn Kumpornsin; Namfon Kotanan; Pantila Taweewigyakarn; Prangisiri Nalaem; Prapai Kreerat; Rattanapong Kompao; Rusmanira Khwanker; Saraiya Chet; Sawanya Chantutanon; Sawvanit Lamun; Sitpitimoh Mina; Stefan Fernandez; Thanat Chookajorn; Theerarat Kochakarn; Treewat Watthanachockchai; Wachirapun Chainontee; Wasun Chantratita; Wudtichai Manasatienkit |
| EPI_ISL_1491563, EPI_ISL_2104756                                                                                                                                                                                                                                                                                                                                                                                                                                                                                                                                                                                                                                                                                                                                                                                                                                                                                                                                                                                                                                                                                                                                                                                                                                                                                                                                                                                                                                                                                                                                                                                                                                                                                                                                                                                                                                                                                                                                                                                                                                                                                                                                                                                                                                                                                                                                                                                                                                                                                                                                                                                                                                                                                                                                                                                                                                                                                                                                                                                                                                                   | Division of Epidemiology                                                                                                                                                                   | COVID-19 Network Investigations (CONI) Alliance                                                                                                                                           | Bronwyn Kleinhans; Gert van Zyl; Susan Engelbrecht; Wolfgang Preiser                                                                                                                                                                                                                                                                                                                                                                                                                                                                                                                                                                                                                                                                                                         |
| EPI_ISL_1591400                                                                                                                                                                                                                                                                                                                                                                                                                                                                                                                                                                                                                                                                                                                                                                                                                                                                                                                                                                                                                                                                                                                                                                                                                                                                                                                                                                                                                                                                                                                                                                                                                                                                                                                                                                                                                                                                                                                                                                                                                                                                                                                                                                                                                                                                                                                                                                                                                                                                                                                                                                                                                                                                                                                                                                                                                                                                                                                                                                                                                                                                    | Division of Medical Virology, National Health Laboratory Service (NHLs), Tygerberg Hospital / Stellenbosch University                                                                      | Division of Medical Virology, Stellenbosch University and NHLs Tygerberg Hospital                                                                                                         | Daesang Lee; Dong Hyun Song; Heui Man Kim; Hye-Jun Jo; Jeong-Min Kim; Jun-Sub Kim; Junhyeong Jang; Mi-Seon Kim; Myung Guk Han; Namjoo Lee; Sang Hee Woo; Sehee Park; Seong Tae Jeong; Yoon-Seok Chung                                                                                                                                                                                                                                                                                                                                                                                                                                                                                                                                                                        |
| EPI_ISL_412869, EPI_ISL_425118, EPI_ISL_506994                                                                                                                                                                                                                                                                                                                                                                                                                                                                                                                                                                                                                                                                                                                                                                                                                                                                                                                                                                                                                                                                                                                                                                                                                                                                                                                                                                                                                                                                                                                                                                                                                                                                                                                                                                                                                                                                                                                                                                                                                                                                                                                                                                                                                                                                                                                                                                                                                                                                                                                                                                                                                                                                                                                                                                                                                                                                                                                                                                                                                                     | Division of Viral Diseases, Center for Laboratory Control of Infectious Diseases, Korea Centers for Diseases Control and Prevention                                                        | Division of Viral Diseases, Center for Laboratory Control of Infectious Diseases, Korea Centers for Diseases Control and Prevention                                                       |                                                                                                                                                                                                                                                                                                                                                                                                                                                                                                                                                                                                                                                                                                                                                                              |
| EPI_ISL_722209                                                                                                                                                                                                                                                                                                                                                                                                                                                                                                                                                                                                                                                                                                                                                                                                                                                                                                                                                                                                                                                                                                                                                                                                                                                                                                                                                                                                                                                                                                                                                                                                                                                                                                                                                                                                                                                                                                                                                                                                                                                                                                                                                                                                                                                                                                                                                                                                                                                                                                                                                                                                                                                                                                                                                                                                                                                                                                                                                                                                                                                                     | Dom Zdravlja Sarajevo                                                                                                                                                                      | Alea Genetic Center                                                                                                                                                                       | Konjhozdic R.; Pecar D.; Salihfendic L.                                                                                                                                                                                                                                                                                                                                                                                                                                                                                                                                                                                                                                                                                                                                      |
| EPI_ISL_481757                                                                                                                                                                                                                                                                                                                                                                                                                                                                                                                                                                                                                                                                                                                                                                                                                                                                                                                                                                                                                                                                                                                                                                                                                                                                                                                                                                                                                                                                                                                                                                                                                                                                                                                                                                                                                                                                                                                                                                                                                                                                                                                                                                                                                                                                                                                                                                                                                                                                                                                                                                                                                                                                                                                                                                                                                                                                                                                                                                                                                                                                     | Dr. Georges-L.-Dumont University Hospital Centre                                                                                                                                           | National Microbiology Laboratory                                                                                                                                                          | Anna Majer; Elsie Grudeski; Gary Van Domselaar; Grace Seo; Guillaume Desnoyers; Jennifer Tanner; Kerstin Burak; Morag Graham; Natalie Knox; Nathalie Bastien; Philip Mabon; Rhiannon Huzarewicz; Richard Garceau; Russell Mandes; Shari Tyson; Timothy Booth; Yan Li                                                                                                                                                                                                                                                                                                                                                                                                                                                                                                         |
| EPI_ISL_1055450, EPI_ISL_1055451                                                                                                                                                                                                                                                                                                                                                                                                                                                                                                                                                                                                                                                                                                                                                                                                                                                                                                                                                                                                                                                                                                                                                                                                                                                                                                                                                                                                                                                                                                                                                                                                                                                                                                                                                                                                                                                                                                                                                                                                                                                                                                                                                                                                                                                                                                                                                                                                                                                                                                                                                                                                                                                                                                                                                                                                                                                                                                                                                                                                                                                   | Dr. Leonard A. Miller Centre for Health Services                                                                                                                                           | National Microbiology Laboratory (NML)                                                                                                                                                    | Adel Malek; Anna Majer; Anneliese Landgraf; CanCOGeN's metadata curation team; Darian Hole; Elsie Grudeski; Gary Van Domselaar; George Zahariadis; Grace Seo; Jennifer Tanner; Kerri Smith; Kirsten Bigger; Laura Gilbert; Madison Chapel; Morag Graham; Natalie Knox; Nathalie Bastien; Philip Mabon; Public Health Agency of Canada CanCOGeN team; Rhiannon Huzarewicz; Robert Needle; Russell Mandes; Shari Tyson; Timothy Booth; Yan Li; Yang Yu                                                                                                                                                                                                                                                                                                                         |
| EPI_ISL_1708500                                                                                                                                                                                                                                                                                                                                                                                                                                                                                                                                                                                                                                                                                                                                                                                                                                                                                                                                                                                                                                                                                                                                                                                                                                                                                                                                                                                                                                                                                                                                                                                                                                                                                                                                                                                                                                                                                                                                                                                                                                                                                                                                                                                                                                                                                                                                                                                                                                                                                                                                                                                                                                                                                                                                                                                                                                                                                                                                                                                                                                                                    | Dr.S.raju Director of public heath and preventive medicine                                                                                                                                 | inStem NCBS                                                                                                                                                                               | Aswin Seshasayee"                                                                                                                                                                                                                                                                                                                                                                                                                                                                                                                                                                                                                                                                                                                                                            |
| EPI_ISL_417211, EPI_ISL_417212                                                                                                                                                                                                                                                                                                                                                                                                                                                                                                                                                                                                                                                                                                                                                                                                                                                                                                                                                                                                                                                                                                                                                                                                                                                                                                                                                                                                                                                                                                                                                                                                                                                                                                                                                                                                                                                                                                                                                                                                                                                                                                                                                                                                                                                                                                                                                                                                                                                                                                                                                                                                                                                                                                                                                                                                                                                                                                                                                                                                                                                     | Dunedin Hospital                                                                                                                                                                           | University of Otago                                                                                                                                                                       | B. Lawley; J. Grant; J. Ussher; M.E. Quiñones-Mateu; R. Harfoot                                                                                                                                                                                                                                                                                                                                                                                                                                                                                                                                                                                                                                                                                                              |
| EPI_ISL_460996, EPI_ISL_461197, EPI_ISL_523023, EPI_ISL_523289, EPI_ISL_523622                                                                                                                                                                                                                                                                                                                                                                                                                                                                                                                                                                                                                                                                                                                                                                                                                                                                                                                                                                                                                                                                                                                                                                                                                                                                                                                                                                                                                                                                                                                                                                                                                                                                                                                                                                                                                                                                                                                                                                                                                                                                                                                                                                                                                                                                                                                                                                                                                                                                                                                                                                                                                                                                                                                                                                                                                                                                                                                                                                                                     | Dutch COVID-19 response team                                                                                                                                                               | Erasmus Medical Center                                                                                                                                                                    | Anne van der Linden; Anniemiek van der Eijk; Aura Timen; Bas Oude Munnink; Claudia Schapendonk; Corien Swaan; Corine GeurtsvanKessel; David Nieuwenhuijse; Irina Cherkatova; Jeroen van Kampen; Jolanda Voermans; Madelief Mollers; Manon Haverkate; Marion Koronk; Mark Pronk; Mart Stein; OH consortium; Pascal Lexmond; Reina Sikkema; Richard Molenkamp; Sandra Kengne Kamga Mobou; Stefan van Nieuwkoop; Theo Bestebroer; on behalf of the Dutch national COVID-19 response team.                                                                                                                                                                                                                                                                                       |
| EPI_ISL_2030644                                                                                                                                                                                                                                                                                                                                                                                                                                                                                                                                                                                                                                                                                                                                                                                                                                                                                                                                                                                                                                                                                                                                                                                                                                                                                                                                                                                                                                                                                                                                                                                                                                                                                                                                                                                                                                                                                                                                                                                                                                                                                                                                                                                                                                                                                                                                                                                                                                                                                                                                                                                                                                                                                                                                                                                                                                                                                                                                                                                                                                                                    | Dutch COVID-19 response team                                                                                                                                                               | Medical Microbiology, Maastricht University Medical Centre                                                                                                                                | Brian van der Veer"; Carmen Reumkens; Christian Hoebe; Erik Beuken; Jozef Dingemans"; Lieke van Alphen; Paul Savelkoul                                                                                                                                                                                                                                                                                                                                                                                                                                                                                                                                                                                                                                                       |
| EPI_ISL_547445, EPI_ISL_547452, EPI_ISL_636493, EPI_ISL_636514, EPI_ISL_636516, EPI_ISL_636517, EPI_ISL_636520, EPI_ISL_636521, EPI_ISL_728645, EPI_ISL_904701, EPI_ISL_905171, EPI_ISL_1014018, EPI_ISL_1014270, EPI_ISL_1014279, EPI_ISL_1014283, EPI_ISL_1014336, EPI_ISL_1014557, EPI_ISL_1014559, EPI_ISL_1014571, EPI_ISL_1014572, EPI_ISL_1014573, EPI_ISL_1014577, EPI_ISL_1014579, EPI_ISL_1014582, EPI_ISL_1014584, EPI_ISL_1014585, EPI_ISL_1014587, EPI_ISL_1014642, EPI_ISL_1014655, EPI_ISL_1014672, EPI_ISL_1014673, EPI_ISL_1035061, EPI_ISL_1035080, EPI_ISL_1035764, EPI_ISL_1035765, EPI_ISL_1035771, EPI_ISL_1035802, EPI_ISL_1059905, EPI_ISL_1059911, EPI_ISL_1089775, EPI_ISL_1090203, EPI_ISL_1090211, EPI_ISL_1090258, EPI_ISL_1165588, EPI_ISL_1165595, EPI_ISL_1232249, EPI_ISL_1232259, EPI_ISL_1232268, EPI_ISL_1232269, EPI_ISL_1232270, EPI_ISL_1232272, EPI_ISL_1232282, EPI_ISL_1232283, EPI_ISL_1232295, EPI_ISL_1232317, EPI_ISL_1232328, EPI_ISL_1232564, EPI_ISL_1232632, EPI_ISL_1232640, EPI_ISL_1232738, EPI_ISL_1232862, EPI_ISL_1288011, EPI_ISL_1288131, EPI_ISL_1288137, EPI_ISL_1288141, EPI_ISL_1288148, EPI_ISL_1289027, EPI_ISL_1289401, EPI_ISL_1369771, EPI_ISL_1370099, EPI_ISL_1370209, EPI_ISL_1370564, EPI_ISL_1370585, EPI_ISL_1370627, EPI_ISL_1370629, EPI_ISL_1370641, EPI_ISL_1370649, EPI_ISL_1371225, EPI_ISL_1371234, EPI_ISL_1371268, EPI_ISL_1456474, EPI_ISL_1456509, EPI_ISL_1456608, EPI_ISL_1456870, EPI_ISL_1457444, EPI_ISL_1457450, EPI_ISL_1457460, EPI_ISL_1457537, EPI_ISL_1457749, EPI_ISL_1520447, EPI_ISL_1520866, EPI_ISL_1520868, EPI_ISL_1520956, EPI_ISL_1521068, EPI_ISL_1521070, EPI_ISL_1521135, EPI_ISL_1521137, EPI_ISL_1521322, EPI_ISL_1521323, EPI_ISL_1521324, EPI_ISL_1521327, EPI_ISL_1521328, EPI_ISL_1521824, EPI_ISL_1521839, EPI_ISL_1521842, EPI_ISL_1521851, EPI_ISL_1521852, EPI_ISL_1521858, EPI_ISL_1521859, EPI_ISL_1521874, EPI_ISL_1522076, EPI_ISL_1522127, EPI_ISL_1522175, EPI_ISL_1522179, EPI_ISL_1522181, EPI_ISL_1522183, EPI_ISL_1522185, EPI_ISL_1522202, EPI_ISL_1522205, EPI_ISL_1522211, EPI_ISL_1522215, EPI_ISL_1522220, EPI_ISL_1595980, EPI_ISL_1595982, EPI_ISL_1596046, EPI_ISL_1596172, EPI_ISL_1596184, EPI_ISL_1596244, EPI_ISL_1596277, EPI_ISL_1596483, EPI_ISL_1704912, EPI_ISL_1704921, EPI_ISL_1704922, EPI_ISL_1704938, EPI_ISL_1705041, EPI_ISL_1705242, EPI_ISL_1705251, EPI_ISL_1705268, EPI_ISL_1705285, EPI_ISL_1705293, EPI_ISL_1705864, EPI_ISL_1792349, EPI_ISL_1792365, EPI_ISL_1792369, EPI_ISL_1792377, EPI_ISL_1792864, EPI_ISL_1792867, EPI_ISL_1792871, EPI_ISL_1961426, EPI_ISL_1961564, EPI_ISL_1961900, EPI_ISL_1962977, EPI_ISL_2093518, EPI_ISL_2093521, EPI_ISL_2093626, EPI_ISL_2093648, EPI_ISL_2093651, EPI_ISL_2093805, EPI_ISL_2094043, EPI_ISL_2094338, EPI_ISL_2094340, EPI_ISL_2094343, EPI_ISL_2094411, EPI_ISL_2216040, EPI_ISL_2217024, EPI_ISL_2217866, EPI_ISL_2218097, EPI_ISL_2218108, EPI_ISL_2218308, EPI_ISL_2218686, EPI_ISL_2218724, EPI_ISL_2218740, EPI_ISL_2218997, EPI_ISL_2219319, EPI_ISL_2219993 |                                                                                                                                                                                            |                                                                                                                                                                                           |                                                                                                                                                                                                                                                                                                                                                                                                                                                                                                                                                                                                                                                                                                                                                                              |
| see above                                                                                                                                                                                                                                                                                                                                                                                                                                                                                                                                                                                                                                                                                                                                                                                                                                                                                                                                                                                                                                                                                                                                                                                                                                                                                                                                                                                                                                                                                                                                                                                                                                                                                                                                                                                                                                                                                                                                                                                                                                                                                                                                                                                                                                                                                                                                                                                                                                                                                                                                                                                                                                                                                                                                                                                                                                                                                                                                                                                                                                                                          | Dutch COVID-19 response team                                                                                                                                                               | National Institute for Public Health and the Environment (RIVM)                                                                                                                           | Adam Meijer; AnneMarie van den Brandt; Annelies Kroneman; Bas van der Veer; Chantal Reusken; Dennis Schmitz; Dirk Eggink; Eunice Then; Florian Zwagemaker; Harry Venema; James Groot; Jeroen Cremer; Jolienke Hardeman; Karim Hajji; Kim Freeriks; Linda van de Nes; Lisa Wijsman; Lynn Aarts; Melissa van Tuij; Robert Kohl; Rianne Jaarsma; Sanne Bos; Sharon van den Brink; Sjoerd Kuling; on behalf of the national COVID-19 response team                                                                                                                                                                                                                                                                                                                               |

|                                                                                                                                                                                                                                                                                |                                                                                                                                                                          |                                                                                                                                            |                                                                                                                                                                                                                                                                                                                                                                                                                                                                                                                                                                                     |
|--------------------------------------------------------------------------------------------------------------------------------------------------------------------------------------------------------------------------------------------------------------------------------|--------------------------------------------------------------------------------------------------------------------------------------------------------------------------|--------------------------------------------------------------------------------------------------------------------------------------------|-------------------------------------------------------------------------------------------------------------------------------------------------------------------------------------------------------------------------------------------------------------------------------------------------------------------------------------------------------------------------------------------------------------------------------------------------------------------------------------------------------------------------------------------------------------------------------------|
| EPI_ISL_1137609                                                                                                                                                                                                                                                                | Département de Maladies Infectieuses, CHU Farhat Hached Sousse, Tunisie                                                                                                  | Laboratoire des Procédés de Criblage Moléculaire et Cellulaire-Centre de Biotechnologie de Sfax                                            | A. and Masmoudi, S.; Abdelmoulah, F.; Abid, M.; Abid, N.; Ajili, F.; Aouni, M.; Ben Ayed, I.; Bensaid, M.; Chawech, H.; Chtourou, A.; Elargoubi, A.; Fki-berrajah, L.; Gaaloul, I.; Gargouri, S.; Hammami, A.; Kamoun, S.; Karray Hakim, H.; Kharat, N.; Letaief, A.; Mastouri, M.; Mhalla, S.; Nabil, A.; Rebai, Smeti, I.; Souissi, A.; Stambouli, N.; Turki, M.                                                                                                                                                                                                                  |
| EPI_ISL_450518                                                                                                                                                                                                                                                                 | E. Gulbja Laboratorija                                                                                                                                                   | Latvian Biomedical Research and Study Centre                                                                                               | Dmitrijs Perminovs; Ivars Silamielis; Jnis Kloviš; Kaspars Megnis; Mikus Gavars; Monta Ustinova; Uga Dumpis; Vita Rovte; ikita Zrelovs                                                                                                                                                                                                                                                                                                                                                                                                                                              |
| EPI_ISL_961860, EPI_ISL_1613754                                                                                                                                                                                                                                                | E. Gulbja laboratorija                                                                                                                                                   | Latvian Biomedical Research and Study Centre                                                                                               | Daivs Fridmanis; Davids Fridmanis; Dmitrijs Perminovs; Dmitrijs Perminovs; Elina Dimina; Guntars Zarins; Ivars Silamikelis; Ivars Silamikelis; Janis Klovinis; Janis Pjalkovskis; Janis Klovinis; Juris Perevoscikovs; Kaspars Megnis; Kaspars Megnis; Laila Silamikele; Laila Silamikele; Lauma Freimane; Lauma Freimane; Laura Ansonē; Laura Ansonē; Liga Birzniece; Liga Birzniece; Mikus Gavars; Mikus Gavars; Monta Ustinova; Monta Ustinova; Nikita Zrelovs; Nikita Zrelovs; Uga Dumpis; Uga Dumpis; Una Krumina; Vita Rovite; Vita Rovite                                    |
| EPI_ISL_1582978, EPI_ISL_1582980                                                                                                                                                                                                                                               | E.S.E. HOSPITAL SAN JOSE DE MAICAO                                                                                                                                       | Instituto Nacional de Salud- Dirección de Investigación en Salud Pública                                                                   | Carlos Franco-Muñoz; Carmen Osorio; Diana Malo; Diego A. Álvarez-Díaz; Diego Andrés Prada; Gerardo Santamaría; Hector Alejandro Ruiz-Moreno; Jhonnatan Reales-González; Juan Camilo Martínez; Julian Naizaque; Katherine Laiton-Donato; Lisseth Pardo; Magdalena Wiesner; Marcela Mercado-Reyes; María T. Herrera-Sepúlveda; Marta Lopez Blanco; Martha Lucia Ospina Martínez; Paola Rojas; Sergio Gomez; Sheryll Corchuelo; Ángela Alarcón Cruz                                                                                                                                    |
| EPI_ISL_1915793                                                                                                                                                                                                                                                                | EHA Clinics                                                                                                                                                              | National Reference Laboratory, Nigeria Centre for Disease Control                                                                          | Anthony Ahumbe; Catherine Okoi; Chimaobi Chukwu; Dr Chikwe Ihekweazu; Dr Ndodo Nnaemeka; Dr Omoare Adesuyi; Grace Esebanmen; Naidoo Dhamari; Nwando Mba; Olusola Anuoluwapo Akanbi                                                                                                                                                                                                                                                                                                                                                                                                  |
| EPI_ISL_2029260                                                                                                                                                                                                                                                                | Ekstralab Tuzla                                                                                                                                                          | Alea Genetic Centre                                                                                                                        | Adis Kandic; Dino Pecar; Enis Kandic; Lana Salihfendic; Nusret Butkovic; Rijad Konjhodzic                                                                                                                                                                                                                                                                                                                                                                                                                                                                                           |
| EPI_ISL_1495721                                                                                                                                                                                                                                                                | Elling group, Institute of Molecular Biotechnology (IMBA)                                                                                                                | Bergthaler laboratory, CeMM Research Center for Molecular Medicine of the Austrian Academy of Sciences                                     | Andreas Bergthaler; Anna Schedl; Bekir Erguner; Benedikt Agerer; Christoph Bock; Fabian Amman; Jan Laine; Lukas Endler; Maelle Le Moing; Martin Senekowitsch; Michael Schuster; Petr Triska; Thomas Penz                                                                                                                                                                                                                                                                                                                                                                            |
| EPI_ISL_1122017                                                                                                                                                                                                                                                                | Emergency department of COVID-19, Beijing Ditan Hospital, Capital Medical University, Beijing, China.                                                                    | National Institute for Viral Disease Control and Prevention                                                                                | 3*; Di Tian1; Gang Liu1; Gang Wan1; Jianbo Tan1; Long Liu1; Pan Xiang1; Shuangli Zhu2; Shuping Cui1; Tingyu Zhang1; Wei Zhang1#; Wenbo Xu2# and Zhihai Chen1#; Xianbo Wang1; Xiang Zhao2; Yang Song2*; Yanhai Wang2; Yanli Xu1; Yu Wang1; Ziruo Ge1*                                                                                                                                                                                                                                                                                                                                |
| EPI_ISL_1278064                                                                                                                                                                                                                                                                | Emory Molecular Diagnostics Laboratory, Emory Healthcare                                                                                                                 | Piantadosi Lab, Emory Department of Pathology                                                                                              | Ahmed Babiker; Anne Piantadosi                                                                                                                                                                                                                                                                                                                                                                                                                                                                                                                                                      |
| EPI_ISL_1897644, EPI_ISL_1897646, EPI_ISL_1897648, EPI_ISL_1897884, EPI_ISL_1898554, EPI_ISL_1898814, EPI_ISL_1899047, EPI_ISL_2241493, EPI_ISL_2241494, EPI_ISL_2241611, EPI_ISL_2241622, EPI_ISL_2241623                                                                     | see above                                                                                                                                                                | International Centre for Genetic Engineering and Biotechnology (ICGEB) and ARGO Open Lab for Genome Sequencing                             | Alessandro Marcello; Danilo Licastro; Emanuele Orsini; Getnet Hailu; Hailu Dadi; Kassahun Tesfaye; Keyru Tuki; Kominist Asmamaw; Molalegne Bitew; Simeone Dal Monego; Yakob Gebregziabher Tsegay                                                                                                                                                                                                                                                                                                                                                                                    |
| EPI_ISL_1712306                                                                                                                                                                                                                                                                | FSBI «NATIONAL MEDICAL RESEARCH CENTER FOR OBSTETRICS, GYNECOLOGY AND PERINATOLOGY NAMED AFTER ACADEMICIAN V.I.KULAKOV» MINISTRY OF HEALTHCARE OF THE RUSSIAN FEDERATION | Center for Precision Genome Editing and Genetic Technologies for Biomedicine, Pirogov Medical University, Moscow, Russian Federation       | Anastasia Shut; Andrey Krivoy; Dmitriy Korostin; Margarita Korzhanova; Vera Belova; Yegor Botsmanov                                                                                                                                                                                                                                                                                                                                                                                                                                                                                 |
| EPI_ISL_1491581, EPI_ISL_1491582                                                                                                                                                                                                                                               | Faculty of Medicine Vajira Hospital                                                                                                                                      | COVID-19 Network Investigations (CONI) Alliance                                                                                            | Ampan Vimovattana; Anan Manomaipiboon; Angkana Huang; Anthony R. Jones; Arporn Wangwiwatsin; Bhakbhoom Panthan; Chayanit Phutthanu; Chonticha Klungtong; Duangkamon Loesbanluechai; Ekawat Pasomsub; Elizabeth Batty; Insee Sarnorn; Jakravoot Maneerit; Janjira Thaipadungpanit; Khajohn Joonlasak; Kingkan Rakmanee; Krittikorn Kumpornsin; Namfon Kotanan; Stefan Fernandez; Sunisa Dongphooayo; Thanat Chookajorn; Theerarat Kochakarn; Tonsan Hansirisathit; Treewat Watthanachockchai; Uraporn Phumisantiphong; Wasun Chantratita; Wipawee Thongsopa; Wudtichai Manasatienkij |
| EPI_ISL_1273102                                                                                                                                                                                                                                                                | Faculty of Medicine, Al-Quds University                                                                                                                                  | Faculty of Medicine, Al-Quds University                                                                                                    | Al-Jawabreh, A.; Dumaidi, K.; Ereqat, S.; Nasereddin, A.                                                                                                                                                                                                                                                                                                                                                                                                                                                                                                                            |
| EPI_ISL_2153098, EPI_ISL_2153110                                                                                                                                                                                                                                               | Fimlab Laboratories                                                                                                                                                      | Fimlab Laboratories                                                                                                                        | Bruno Luukinen; Leena Huhti; Mauri Keinänen; Minna Paloniemi; Sara Lehtinen; Tapio Seiskari                                                                                                                                                                                                                                                                                                                                                                                                                                                                                         |
| EPI_ISL_512561, EPI_ISL_514202, EPI_ISL_568607, EPI_ISL_790567, EPI_ISL_1240022                                                                                                                                                                                                | Florida Bureau of Public Health Laboratories                                                                                                                             | Florida Bureau of Public Health Laboratories                                                                                               | Jason Blanton; Sarah Schmedes                                                                                                                                                                                                                                                                                                                                                                                                                                                                                                                                                       |
| EPI_ISL_2087052                                                                                                                                                                                                                                                                | Fondation Congolaise pour la recherche medicale (FCRM), Francine Ntoumi                                                                                                  | Centre de Recherche sur les Maladies Infectieuses                                                                                          | Mfoutou Mapanguy Claujeans Chastel and Batchi-Bouyou Armel Landry; Prof. Dr. Thirumalaisamy P. Velavan; Prof. Francine Ntoumi                                                                                                                                                                                                                                                                                                                                                                                                                                                       |
| EPI_ISL_1654217, EPI_ISL_1671923, EPI_ISL_1671928, EPI_ISL_1854756, EPI_ISL_1854760, EPI_ISL_1854769, EPI_ISL_1854776, EPI_ISL_1854782, EPI_ISL_1854783, EPI_ISL_1854786, EPI_ISL_1854788, EPI_ISL_1854794, EPI_ISL_1857277, EPI_ISL_1857278, EPI_ISL_1857281, EPI_ISL_1857286 | see above                                                                                                                                                                | Institute of Tropical Medicine                                                                                                             | Mfoutou Mapanguy Claujeans Chastel and Batchi-Bouyou Armel Landry; Prof. Dr. Thirumalaisamy P. Velavan; Prof. Dr. Thirumalaisamy P. Velavan and Prof. Francine Ntoumi; Prof. Francine Ntoumi; Prof. Francine Ntoumi and Prof. Dr. Thirumalaisamy P. Velavan                                                                                                                                                                                                                                                                                                                         |
| EPI_ISL_1555833, EPI_ISL_1556881, EPI_ISL_1557098, EPI_ISL_1613822, EPI_ISL_1839845, EPI_ISL_2133940                                                                                                                                                                           | Fulgent Genetics                                                                                                                                                         | Centers for Disease Control and Prevention Division of Viral Diseases, Pathogen Discovery                                                  | Adrian Paskey; Becky Tsai; Benafsh Sapra; Benjamin Rambo-Martin; Christopher Gulvick; Clinton R. Paden; Dakota Howard; Darlene Wagner; Dhvani Batra; Doreen Ng; Duncan MacCannell; Harry Gao; James Xie; Jason Caravas; John Gao; Joseph Fierro; Kara Moser; Matthew Schmerer; Mickey Li; Peter W. Cook; Scott Sammons; Shatavia Morrison; Yan Meng; Yvette Uhoarumhi                                                                                                                                                                                                               |
| EPI_ISL_1937183                                                                                                                                                                                                                                                                | Fulgent Genetics                                                                                                                                                         | Fulgent Genetics                                                                                                                           | Becky Tsai; Benafsh Sapra; Doreen Ng; Harry Gao; James Xie; John Gao; Joseph Fierro; Mickey Li; Yan Meng                                                                                                                                                                                                                                                                                                                                                                                                                                                                            |
| EPI_ISL_2311861                                                                                                                                                                                                                                                                | Fundação Ezequiel Dias                                                                                                                                                   | Coordenação Geral de Laboratórios de Saúde Pública (CGLAB/DAEVS/SVS/MS)                                                                    | Vagner Fonseca; et al.                                                                                                                                                                                                                                                                                                                                                                                                                                                                                                                                                              |
| EPI_ISL_493364                                                                                                                                                                                                                                                                 | Furst Medical Laboratory                                                                                                                                                 | Norwegian Institute of Public Health, Department of Virology                                                                               | Hilde Elshaug; Kamilla Heddeland Instefjord; Karoline Bragstad; Kathrine Stene-Johansen; Olav Hungnes; Rasmus Riis Kopperud                                                                                                                                                                                                                                                                                                                                                                                                                                                         |
| EPI_ISL_1168002                                                                                                                                                                                                                                                                | GA Department of Public Health Laboratory                                                                                                                                | Genomics and Discovery, Respiratory Viruses Branch, Division of Viral Diseases, Centers for Disease Control and Prevention                 | ; Anna Montmayeur; Anna Uehara; Brian Lynch; Clinton R. Paden; Haibin Wang; Jing Zhang; Krista Queen; Peter W. Cook; Rachel Marine; Suxiang Tong; Yan Li; Ying Tao                                                                                                                                                                                                                                                                                                                                                                                                                  |
| EPI_ISL_2153105                                                                                                                                                                                                                                                                | GENETICS DEPARTMENT, ZHEEN INTERNATIONAL HOSPITAL                                                                                                                        | GENETICS DEPARTMENT, ZHEEN INTERNATIONAL HOSPITAL                                                                                          | Khailany; M.O.; Ozaslan, M.; R.A.; Rahman                                                                                                                                                                                                                                                                                                                                                                                                                                                                                                                                           |
| EPI_ISL_2228787, EPI_ISL_2228801                                                                                                                                                                                                                                               | GH de l'Est Francilien                                                                                                                                                   | Department of Virology, Henri Mondor University Hospital, Assistance Publique Hôpitaux de Paris, Université Paris-Est Créteil, INSERM U955 | Alexandre Soulier; Christophe Rodriguez; Elisabeth Trawinski; Guillaume Gricourt; Jean-Michel Pawlowsky; Melissa N'Debi; Slim Fourati; Vanessa Demontant                                                                                                                                                                                                                                                                                                                                                                                                                            |
| EPI_ISL_1261293                                                                                                                                                                                                                                                                | GHC Genetics s.r.o.                                                                                                                                                      | National Reference Laboratory for Influenza and Respiratory Viruses CZE                                                                    | Alexander Nagy; Dusan Trnka; Helena Jirinova; Jaromira Vecerova; Timotej Suri                                                                                                                                                                                                                                                                                                                                                                                                                                                                                                       |
| EPI_ISL_1719907                                                                                                                                                                                                                                                                | GRMDCR & JU                                                                                                                                                              | Genomic Research Lab, BCSIR                                                                                                                | Abu Sayeed Mohammad Mahmud; Barna Goswami; Eshrar Osman; Iffat Jahan; M Ahsanul Haq; M Firoz Ahmed; Maha Jamiruddin; Md. Ahasan Habib; Md. Murshed Hasan Sarkar; Md. Rubel Hossain; Md. Saddam Hossain; Md. Salim Khan; Mohammad Mohi Uddin; Mohammad Samir Uzzaman; Mohd Raaed Jamiruddin; Mohib Ullah Khondoker; Nihad Adnan; Nowshin Jahan; Shahad Saif Khandker; Shahina Akter; Tamanna Ali; Tanjina Akhter Banu                                                                                                                                                                |
| EPI_ISL_710608                                                                                                                                                                                                                                                                 | Gavle klinisk mikrobiologi                                                                                                                                               | The Public Health Agency of Sweden                                                                                                         | Department of Microbiology; The Public Health Agency of Sweden                                                                                                                                                                                                                                                                                                                                                                                                                                                                                                                      |
| EPI_ISL_730571                                                                                                                                                                                                                                                                 | Gazi University Faculty of Medicine, Medical Virology Laboratory                                                                                                         | Gazi University Faculty of Medicine, Medical Virology Laboratory                                                                           | Erdem ahin; Gülendem Bozday; Hager Muthaf; Il Fidan; Kayhan Çalar; Murat Dizbay; Selin Yiit; Shaknoza Sarzhanova; Özlem Güzel Tunçcan                                                                                                                                                                                                                                                                                                                                                                                                                                               |
| EPI_ISL_1626615, EPI_ISL_2157212                                                                                                                                                                                                                                               | Gencore - Universidad de los Andes                                                                                                                                       | Gencore - Universidad de los Andes                                                                                                         | Ana Maria Palacio; Cristian Barrera; David Gonzalez; Erica Salguero; Gabriela Ariza; Luisa Sacristan; Marcela Guevara; Silvia Restrepo                                                                                                                                                                                                                                                                                                                                                                                                                                              |
| EPI_ISL_2029122                                                                                                                                                                                                                                                                | General Hospital "Abdulah Nakas"                                                                                                                                         | Alea Genetic Centre                                                                                                                        | Adis Kandix; Dino Pecar; Enis Kandic; Lana Salihfendic; Rijad Konjhodzic                                                                                                                                                                                                                                                                                                                                                                                                                                                                                                            |
| EPI_ISL_1731081                                                                                                                                                                                                                                                                | General Hospital "Abdulah Nakas" Sarajevo                                                                                                                                | Alea Genetic Centre                                                                                                                        | Dino Pecar; Lana Salihfendic; Lejla Pojski; Rijad Konjhodzic; Sean Jazic                                                                                                                                                                                                                                                                                                                                                                                                                                                                                                            |
| EPI_ISL_922076                                                                                                                                                                                                                                                                 | General Hospital #Abdulah Nakas" Sarajevo                                                                                                                                | Alea Genetic Centre                                                                                                                        | Dino Pecar; Lana Salihfendic; Rijad Konjhodzic; Sead Jazic                                                                                                                                                                                                                                                                                                                                                                                                                                                                                                                          |
| EPI_ISL_1013098, EPI_ISL_2000842                                                                                                                                                                                                                                               | General Hospital - Kumanovo                                                                                                                                              | Research Center for Genetic Engineering and Biotechnology                                                                                  | Aleksandar J. Dimovski; Dijana Plasheska-Karanfilska; Gjorgji Bozinovski; Milena Jakimovska; Predrag Noveski                                                                                                                                                                                                                                                                                                                                                                                                                                                                        |

|                                                                                                                                                                                                                                                                                                                                                                                                                                                                                      |                                                                                                                                                                      |                                                                                                                                                                                                                            |                                                                                                                                                                                                                                                                                                                                                                                                                                                                                                                                                                                                                                                                                                                                                |
|--------------------------------------------------------------------------------------------------------------------------------------------------------------------------------------------------------------------------------------------------------------------------------------------------------------------------------------------------------------------------------------------------------------------------------------------------------------------------------------|----------------------------------------------------------------------------------------------------------------------------------------------------------------------|----------------------------------------------------------------------------------------------------------------------------------------------------------------------------------------------------------------------------|------------------------------------------------------------------------------------------------------------------------------------------------------------------------------------------------------------------------------------------------------------------------------------------------------------------------------------------------------------------------------------------------------------------------------------------------------------------------------------------------------------------------------------------------------------------------------------------------------------------------------------------------------------------------------------------------------------------------------------------------|
| EPI_ISL_1971000, EPI_ISL_1972221                                                                                                                                                                                                                                                                                                                                                                                                                                                     | General Hospital - Ohrid                                                                                                                                             | "Georgi D. Efremov", Macedonian Academy of Sciences and Arts<br>Research Center for Genetic Engineering and Biotechnology "Georgi D. Efremov", Macedonian Academy of Sciences and Arts                                     | Aleksandar J. Dimovski; Dijana Plasheska-Karanfilska; Gjorgji Bozinovski; Milena Jakimovska; Predrag Noveski                                                                                                                                                                                                                                                                                                                                                                                                                                                                                                                                                                                                                                   |
| EPI_ISL_677674                                                                                                                                                                                                                                                                                                                                                                                                                                                                       | General Hospital - Prilep                                                                                                                                            | Research Center for Genetic Engineering and Biotechnology "Georgi D. Efremov", Macedonian Academy of Sciences and Arts                                                                                                     | RCGEB - MASA                                                                                                                                                                                                                                                                                                                                                                                                                                                                                                                                                                                                                                                                                                                                   |
| EPI_ISL_1138424, EPI_ISL_1970998                                                                                                                                                                                                                                                                                                                                                                                                                                                     | General Hospital - Struga                                                                                                                                            | Research Center for Genetic Engineering and Biotechnology "Georgi D. Efremov", Macedonian Academy of Sciences and Arts                                                                                                     | Aleksandar J. Dimovski; Dijana Plasheska-Karanfilska; Gjorgji Bozinovski; Milena Jakimovska; Predrag Noveski                                                                                                                                                                                                                                                                                                                                                                                                                                                                                                                                                                                                                                   |
| EPI_ISL_1140936                                                                                                                                                                                                                                                                                                                                                                                                                                                                      | General Hospital - Tetovo                                                                                                                                            | Research Center for Genetic Engineering and Biotechnology "Georgi D. Efremov", Macedonian Academy of Sciences and Arts                                                                                                     | Aleksandar J. Dimovski; Dijana Plasheska-Karanfilska; Gjorgji Bozinovski; Milena Jakimovska; Predrag Noveski                                                                                                                                                                                                                                                                                                                                                                                                                                                                                                                                                                                                                                   |
| EPI_ISL_406798                                                                                                                                                                                                                                                                                                                                                                                                                                                                       | General Hospital of Central Theater Command of People's Liberation Army of China                                                                                     | BGI & Institute of Microbiology, Chinese Academy of Sciences & Shandong First Medical University & Shandong Academy of Medical Sciences & General Hospital of Central Theater Command of People's Liberation Army of China | Weifeng Shi and Zhenhong Hu; Weijun Chen; Yuhai Bi                                                                                                                                                                                                                                                                                                                                                                                                                                                                                                                                                                                                                                                                                             |
| EPI_ISL_746489, EPI_ISL_746619, EPI_ISL_746636, EPI_ISL_746716, EPI_ISL_746719, EPI_ISL_746762, EPI_ISL_1167673, EPI_ISL_1167680, EPI_ISL_1167721, EPI_ISL_1167722, EPI_ISL_1167813, EPI_ISL_1300485, EPI_ISL_1300499, EPI_ISL_1321450, EPI_ISL_1321451, EPI_ISL_1321454, EPI_ISL_1321512, EPI_ISL_1321521, EPI_ISL_1321576, EPI_ISL_1321588, EPI_ISL_1534609, EPI_ISL_1541071, EPI_ISL_1633405, EPI_ISL_1633494, EPI_ISL_1633534, EPI_ISL_1712347, EPI_ISL_1712368, EPI_ISL_2009267 | Genetica Molecular and Subdepartamento de Virologia ISP Chile                                                                                                        | Instituto de Salud Publica de Chile                                                                                                                                                                                        | Andres Castillo; Barbara Parra; Gisselle Barra; Jaime Lagos; Javier Tognarelli; Jorge Fernandez; Karen Orostica; Loredana Arata; Patricia Bustos; Rodrigo Fasce; Soledad Ulloa                                                                                                                                                                                                                                                                                                                                                                                                                                                                                                                                                                 |
| see above                                                                                                                                                                                                                                                                                                                                                                                                                                                                            | Genetica y Virologia, Facultad de Ciencias                                                                                                                           | Genetica y Virologia, Facultad de Ciencias                                                                                                                                                                                 | Arbiza, J.; Calleros, L.; Chiparelli, H.; Coppola, L.; Delfraro, A.; Frabasile, S.; Fuques, E.; Goni, N.; Grecco, S.; Marandino, A.; Mogdasy, C.; Panzera, Y.; Perez, R.; Ramos, V.; Ramos, N.; Sorhouet, C.; Techera, C.; Tomas, G.                                                                                                                                                                                                                                                                                                                                                                                                                                                                                                           |
| EPI_ISL_936384                                                                                                                                                                                                                                                                                                                                                                                                                                                                       | Genetica y Virologia, Facultad de Ciencias                                                                                                                           | Genetica y Virologia, Facultad de Ciencias                                                                                                                                                                                 | Yosuke Hirotsu                                                                                                                                                                                                                                                                                                                                                                                                                                                                                                                                                                                                                                                                                                                                 |
| EPI_ISL_2235520                                                                                                                                                                                                                                                                                                                                                                                                                                                                      | Genome Analysis Center, Yamanashi Central Hospital                                                                                                                   | Genome Analysis Center, Yamanashi Central Hospital                                                                                                                                                                         | Arzu Ivem; Ayse Serra Ozel; Betsi Kose; Betsi Köse; Bugra Agaoglu; Elifnaz Çelik; Gizem Alkurt; Gizem Dinler Doganay; Ilker Karacan; Jale Yildiz; Levent Doganay; Mehtap Aydin; Mehtap Aydn; Nihat Bugra Agaoglu; Nilsun Altunal; Nisan Denizce Can; Ozlem Akgun Dogan; Payam Zolfagharian; Tugba Kizilboga Akgun; Yasemin Kendir Demirkol                                                                                                                                                                                                                                                                                                                                                                                                     |
| EPI_ISL_480240, EPI_ISL_735290                                                                                                                                                                                                                                                                                                                                                                                                                                                       | Genomic Laboratory (GLAB) (Conjoint lab of Health Directorate of Istanbul and Istanbul Technical University)                                                         | Genomic Laboratory (GLAB), Istanbul Technical University                                                                                                                                                                   | RCGEB - MASA                                                                                                                                                                                                                                                                                                                                                                                                                                                                                                                                                                                                                                                                                                                                   |
| EPI_ISL_933769                                                                                                                                                                                                                                                                                                                                                                                                                                                                       | Gerontology Institute - Skopje                                                                                                                                       | Research Center for Genetic Engineering and Biotechnology "Georgi D. Efremov", Macedonian Academy of Sciences and Arts                                                                                                     | Firoz Ahmed; Maha Jamiruddin; Mahfuz Marzan; Md. Ahsanul Haq; Mohd. Raeed Jamiruddin; Mohib Ullah Khondoker; Mousumi Chaity; Mumtarin Jannat Oishee; Nafisa Azmuda; Nihad Adnan; Nowshin Jahan; Salma Akter; Sayeda Moriam Liza; Shahad Saif Khandker; Shahana Sharmin; Tamanna Ali; Taslin Jahan Mou                                                                                                                                                                                                                                                                                                                                                                                                                                          |
| EPI_ISL_775217                                                                                                                                                                                                                                                                                                                                                                                                                                                                       | Gonoshasthya-RNA Molecular Research Center                                                                                                                           | Gonoshasthya-RNA Molecular Research Center                                                                                                                                                                                 | Adriana Weeden; Alejandra Valoy; Alexander A. Martinez; Alexander Martinez; Ambar Moreno; Anyuri Ortiz; Brechla Moreno; Castillo Jorge; Claudia Gonzalez; Claudia Gonzalez Sandra Lopez-Verges; Daniel Castillo; Danilo Franco; Davis Beltran; Dimelza Valdespino; Franco Danilo; Gonzalez Claudia; Gretel Vasquez; Ilka Guerra; Isela Guerrero; Jessica Gondola; Jim Chang; Juan Miguel Pascale; Layda Abrego; Leyda Abrego; Lisseth Saenz; Lopez-Verges Sandra; Mabel Martinez-Montero; Maria Chen-German; Marlene Castillo; Marlene Castillo; Martinez Alexander; Melissa Gaitan; Moreno Ambar; Moreno Brechla; Oris Chavarria; Ortiz Alma; Rita Corrales; Rita Rodriguez; Sandra Lopez-Verges; Yamilka Diaz; Yaneth Pitti; Zumara Chaverra |
| EPI_ISL_496746, EPI_ISL_496772, EPI_ISL_496879, EPI_ISL_1225330, EPI_ISL_1225435, EPI_ISL_1225441, EPI_ISL_1225450, EPI_ISL_1225500, EPI_ISL_1225523, EPI_ISL_1502846, EPI_ISL_1502973, EPI_ISL_1503020, EPI_ISL_1503021, EPI_ISL_1503058, EPI_ISL_1503081, EPI_ISL_1503092, EPI_ISL_1503101, EPI_ISL_1503115, EPI_ISL_1503116, EPI_ISL_1503118, EPI_ISL_1503119, EPI_ISL_1503133, EPI_ISL_1503137                                                                                   | Gorgas Memorial Laboratory of Health Studies                                                                                                                         | Gorgas Memorial Laboratory of Health Studies                                                                                                                                                                               | Chaitanya Joshi; Dinesh Kumar; Janvi Raval; Madhvi Joshi; Neeta Khandelwal; Nitesh Shah; Niitin Savaliya; Ramesh Pandit; Sonal Sharma; Twinkle Soni; Umang Mishra; Zarna Patel; Zuber Saiyed                                                                                                                                                                                                                                                                                                                                                                                                                                                                                                                                                   |
| see above                                                                                                                                                                                                                                                                                                                                                                                                                                                                            | Gorgas Memorial Laboratory of Health Studies                                                                                                                         | Gorgas Memorial Laboratory of Health Studies                                                                                                                                                                               | Alethea R. de Guzman; Anna Ong-Lim; Arienne A. Zamora; Asia Louisa U. Chong; Benedict A. Maralit; Candice Francheska B. Tambaon; Carlo M. Lapid; Celia Carlos; Devon Ray Pacial; Edsel Maurice Salvaña; El King D. Morado; Eva Maria Cutiongco-de la Paz; Francis A. Tablizo; Irish Coleen A. Asin; Jaime C. Montoya; Jan Michael C. Yap; Jo-Hannah S. Llamas; John Q. Wong; Joshua Gregor A. Dizon; Juan Antonio R. Magalang; Karol Sophia Agape R. Padilla; Kenneth M. Kim; Kris P. Punayan; Marc Edsel C. Ayes; Marc Jerrone R. Castro; Maria Rosario Singh-Vergeire and Cynthia P. Saloma; Maria Sofia L. Yangzon; Marissa Alejandria; Razel Nikka M. Hao; Rianna Patricia S. Cruz; Sheila Mae M. Araiza                                   |
| EPI_ISL_1544194                                                                                                                                                                                                                                                                                                                                                                                                                                                                      | Government Medical College (GMC), Surat                                                                                                                              | Gujarat Biotechnology Research Centre                                                                                                                                                                                      | Ajay Parida; Amol M. Kanampalliwar; Arup Ghosh; Atimukta Jha; INSACOG Consortium; Punit Prasad; Rajeeb Swain; Rupesh Dash; Safal Wallia; Shifu Aggarwal; Sunil K. Raghav                                                                                                                                                                                                                                                                                                                                                                                                                                                                                                                                                                       |
| EPI_ISL_2105466, EPI_ISL_2105490                                                                                                                                                                                                                                                                                                                                                                                                                                                     | Governor Celestino Gallares Memorial Hospital                                                                                                                        | Philippine Genome Center                                                                                                                                                                                                   | Arash Iranzadeh; Bruna Galvao; Carolyn Williamson; Deelan Doolabh; Diana Hardie; Innocent Mudau; Kruger Marais; Lynn Tyers; Marvin Hsiao; Stephen Korsman                                                                                                                                                                                                                                                                                                                                                                                                                                                                                                                                                                                      |
| EPI_ISL_1662370                                                                                                                                                                                                                                                                                                                                                                                                                                                                      | Govt. Medical College, Ambikapur, Surguja                                                                                                                            | Institute of Life Sciences - INSACOG                                                                                                                                                                                       | Ashish Koshy; Budoor Alqarni; Denghui Liu; Fang Chen; Hanif Khalak; Huanming Yang; Javier Quilez; Jian Wang; Junhua Li; Ke Liang; Long Lin; Mohammed Saifuddin Fasihuddin; Nan Qiao; Nawal Ahmed Mohamed Al Kaabi; Pauline Ogrodzki; Pei Wu; Peng Xiao; Pengjuan Liu; Rong Liu; Sally Mahmoud; Siyang Liu; Stephen S. Francis; Tao Ma; Vinay Kusuma; Walid Abbas Zaher; Weibin Liu; Wenjun He; Xavier Anton; Xin Jin; Xin Meng; Xinyu Huang; Xun Xu; Zhaorong Yuan                                                                                                                                                                                                                                                                             |
| EPI_ISL_2140701                                                                                                                                                                                                                                                                                                                                                                                                                                                                      | Groote Schuur Hospital wc GSH                                                                                                                                        | NHLS/UCT                                                                                                                                                                                                                   | Alberto Paniz-Mondolfi; Camilo Correa-Cardenas; Carlos A. Rincón; Claudia P. Mendez; Elizabeth K. Marquez; Frank de los Santos Ortiz; Juan David Ramirez; Julie J. Perez; Luz H. Patiño; Magda C. Oliveros; Maria C. Duque; Marina Muñoz; Nathalia Ballesteros; Sergio Castañeda                                                                                                                                                                                                                                                                                                                                                                                                                                                               |
| EPI_ISL_698511, EPI_ISL_699041                                                                                                                                                                                                                                                                                                                                                                                                                                                       | Group 42 (G42) Healthcare, Abu Dhabi, United Arab Emirates; Department of Health, The United Arab Emirates                                                           | G42 Healthcare                                                                                                                                                                                                             | Alison Laufer Halpin; Anna Montmayeur; Anna Uehara; Ben L. Rambo-Martin; Clinton R. Paden; Dakota Howard; Darlene Wagner; Dave Wentworth; Dhvani Batra; Haibin Wang; Jasmine Padilla; Jing Zhang; Justin Lee; Katie Dillon; Krista Queen; Kristen Knipe; Kristine Lacey; Lori Rowe; Mark Burroughs; Matthew Schmeer; Mili Sheth; Peter Cook; Peter W. Cook; Rachel Marine; Sam Shepard; Sarah Nobles; Shoshona Le; Suxiang Tong; Vivien Dugan; Yan Li; Ying Tao; Yvette Unoarumhi                                                                                                                                                                                                                                                              |
| EPI_ISL_1040924                                                                                                                                                                                                                                                                                                                                                                                                                                                                      | Grupo de Investigación en Enfermedades Tropicales del Ejército (GINETEJ), Laboratorio de Referencia e Investigación, Dirección de Sanidad Ejército, Bogotá, Colombia | Centro de Investigaciones en Microbiología y Biotecnología-UR (CIMBIUR), Facultad de Ciencias Naturales, Universidad del Rosario, Bogotá, Colombia                                                                         | Baisheng; Min Kang; Xiang Zhao; Xiaoling Deng; Yang Song; Yao Hu; Zhencui Li                                                                                                                                                                                                                                                                                                                                                                                                                                                                                                                                                                                                                                                                   |
| EPI_ISL_1273054, EPI_ISL_1273055, EPI_ISL_1273059, EPI_ISL_1273061, EPI_ISL_1273062, EPI_ISL_1273064, EPI_ISL_1273067, EPI_ISL_1273068, EPI_ISL_1273071, EPI_ISL_1273073, EPI_ISL_1798902, EPI_ISL_1798904, EPI_ISL_1798906, EPI_ISL_1823583, EPI_ISL_1823584, EPI_ISL_1823585, EPI_ISL_1823586, EPI_ISL_2229089, EPI_ISL_2229090, EPI_ISL_2229091, EPI_ISL_2229092, EPI_ISL_2229093, EPI_ISL_2229099, EPI_ISL_2229100, EPI_ISL_2229102, EPI_ISL_2229103                             | Guam Public Health Laboratory                                                                                                                                        | Centers for Disease Control and Prevention Division of Viral Diseases, Pathogen Discovery                                                                                                                                  | Kentaro Itokawa; Makoto Kuroda; Masanori Hashino; Rina Tanaka; Tsuyoshi Sekizuka                                                                                                                                                                                                                                                                                                                                                                                                                                                                                                                                                                                                                                                               |
| see above                                                                                                                                                                                                                                                                                                                                                                                                                                                                            | Guam Public Health Laboratory                                                                                                                                        | Centers for Disease Control and Prevention Division of Viral Diseases, Pathogen Discovery                                                                                                                                  | Andrey Komissarov; Anna Ivanova; Artem Fadeev; Daria Danilenko; Dmitry Bazhenov; Kseniya Komissarova                                                                                                                                                                                                                                                                                                                                                                                                                                                                                                                                                                                                                                           |
| EPI_ISL_1969692                                                                                                                                                                                                                                                                                                                                                                                                                                                                      | Guangdong Provincial Center for Disease Control and Prevention                                                                                                       | National Institute for Viral Disease Control and Prevention, China CDC                                                                                                                                                     | Alexey Masharsky; Andrey Komissarov; Anna Ivanova; Artem Fadeev; Daria Danilenko; Dmitry Bazhenov; Dmitry Lioznov; Elena Nabieva; Georgii                                                                                                                                                                                                                                                                                                                                                                                                                                                                                                                                                                                                      |
| EPI_ISL_1425568                                                                                                                                                                                                                                                                                                                                                                                                                                                                      | Gunma Prefectural Institute of Public Health and Environmental Sciences                                                                                              | Pathogen Genomics Center, National Institute of Infectious Diseases                                                                                                                                                        |                                                                                                                                                                                                                                                                                                                                                                                                                                                                                                                                                                                                                                                                                                                                                |
| EPI_ISL_596295                                                                                                                                                                                                                                                                                                                                                                                                                                                                       | HELIX LCC                                                                                                                                                            | WHO National Influenza Centre Russian Federation                                                                                                                                                                           |                                                                                                                                                                                                                                                                                                                                                                                                                                                                                                                                                                                                                                                                                                                                                |
| EPI_ISL_733078, EPI_ISL_1491702, EPI_ISL_1491707, EPI_ISL_1652617, EPI_ISL_1652655, EPI_ISL_1919530, EPI_ISL_1919536                                                                                                                                                                                                                                                                                                                                                                 | HELIX LLC                                                                                                                                                            | WHO National Influenza Centre Russian Federation                                                                                                                                                                           |                                                                                                                                                                                                                                                                                                                                                                                                                                                                                                                                                                                                                                                                                                                                                |
| see above                                                                                                                                                                                                                                                                                                                                                                                                                                                                            | HELIX LLC                                                                                                                                                            | WHO National Influenza Centre Russian Federation                                                                                                                                                                           |                                                                                                                                                                                                                                                                                                                                                                                                                                                                                                                                                                                                                                                                                                                                                |

|                                                                                                                                                                                                                             |                                                                                                                                                                  |                                                                                                                                                                  |                                                                                                                                                                                                                                                                                                                                                                                                                                                                                                                                                                                                                                                                                                                                                                                                                                                                                                                                                                                                                                                                                                                                                                                                                                                                                                                                                                                                                                                                                                                                                                                                                         |
|-----------------------------------------------------------------------------------------------------------------------------------------------------------------------------------------------------------------------------|------------------------------------------------------------------------------------------------------------------------------------------------------------------|------------------------------------------------------------------------------------------------------------------------------------------------------------------|-------------------------------------------------------------------------------------------------------------------------------------------------------------------------------------------------------------------------------------------------------------------------------------------------------------------------------------------------------------------------------------------------------------------------------------------------------------------------------------------------------------------------------------------------------------------------------------------------------------------------------------------------------------------------------------------------------------------------------------------------------------------------------------------------------------------------------------------------------------------------------------------------------------------------------------------------------------------------------------------------------------------------------------------------------------------------------------------------------------------------------------------------------------------------------------------------------------------------------------------------------------------------------------------------------------------------------------------------------------------------------------------------------------------------------------------------------------------------------------------------------------------------------------------------------------------------------------------------------------------------|
|                                                                                                                                                                                                                             |                                                                                                                                                                  |                                                                                                                                                                  | Bazykin; Kirill Varchenko; Ksenia Safina; Kseniya Komissarova; Maria Baturova; Maria Pisareva; Maria Timofeeva; Mikhail Bakaev; Nikita Yolshin; Oula Masour; Tamila Musaeva; Veronika Eder                                                                                                                                                                                                                                                                                                                                                                                                                                                                                                                                                                                                                                                                                                                                                                                                                                                                                                                                                                                                                                                                                                                                                                                                                                                                                                                                                                                                                              |
| EPI_ISL_1118001, EPI_ISL_1678405, EPI_ISL_1965445, EPI_ISL_1965553                                                                                                                                                          | HG Pharma GmbH                                                                                                                                                   | Berghaler laboratory, CeMM Research Center for Molecular Medicine of the Austrian Academy of Sciences                                                            | Andreas Berghaler; Anna Schedl; Bekir Erguner; Benedikt Agere; Christoph Bock; Fabian Amman; Jan Laine; Lukas Endler; Maelle Le Moing; Martin Senekowitsch; Michael Schuster; Petr Triska; Thomas Penz                                                                                                                                                                                                                                                                                                                                                                                                                                                                                                                                                                                                                                                                                                                                                                                                                                                                                                                                                                                                                                                                                                                                                                                                                                                                                                                                                                                                                  |
| EPI_ISL_1169919                                                                                                                                                                                                             | HIV Molecular Laboratory, Ethiopian Public Health Institute                                                                                                      | HIV Molecular Laboratory, Ethiopian Public Health Institute                                                                                                      | A.G.; Abichu, G.; Ahyong, V.; D. and Tato, C.; Damena, D.; Detweiler, A.; Fahsbender, E.; Gutema, G.; Kalantar, K.; Kidane, E.; Leta; Neff, N.; S.K.; Tan, M.; Tessema; Vanaerschot, M.; Weldemariam                                                                                                                                                                                                                                                                                                                                                                                                                                                                                                                                                                                                                                                                                                                                                                                                                                                                                                                                                                                                                                                                                                                                                                                                                                                                                                                                                                                                                    |
| EPI_ISL_2187739, EPI_ISL_2187991, EPI_ISL_2187996, EPI_ISL_2188023, EPI_ISL_2222917                                                                                                                                         | HLAGYN - Laboratorio de Imunologia de Transplantes de Goias                                                                                                      | HLAGYN - Laboratorio de Imunologia de Transplantes de Goias                                                                                                      | Alessandro Leonardo Alvares Magalhaes; Daniel Ferreira de Sousa; Erika Lopes Rocha Batista; Fernando Antonio Vinhal dos Santos; Frederico Rodrigues Vinhal; Lucas Carlos Gomes Pereira; Sabrina Sara Moreira Duarte                                                                                                                                                                                                                                                                                                                                                                                                                                                                                                                                                                                                                                                                                                                                                                                                                                                                                                                                                                                                                                                                                                                                                                                                                                                                                                                                                                                                     |
| EPI_ISL_1811235                                                                                                                                                                                                             | HNN                                                                                                                                                              | ICIENSA, Instituto Costarricense de Investigación y Enseñanza en Nutrición y Salud                                                                               | Pérez-Corrales C & Morazán-Fernández D                                                                                                                                                                                                                                                                                                                                                                                                                                                                                                                                                                                                                                                                                                                                                                                                                                                                                                                                                                                                                                                                                                                                                                                                                                                                                                                                                                                                                                                                                                                                                                                  |
| EPI_ISL_1406651                                                                                                                                                                                                             | HOPITAL DE VICHY                                                                                                                                                 | CHU Clermont-Ferrand, service de virologie                                                                                                                       | Bisseux Maxime; Combes Patricia; Henquell Cécile; Mirand Audrey                                                                                                                                                                                                                                                                                                                                                                                                                                                                                                                                                                                                                                                                                                                                                                                                                                                                                                                                                                                                                                                                                                                                                                                                                                                                                                                                                                                                                                                                                                                                                         |
| EPI_ISL_1336649                                                                                                                                                                                                             | HOPITAL PRINCESSE GRACE                                                                                                                                          | CNR Virus des Infections Respiratoires - France SUD                                                                                                              | Antonin Bal; Bruno Lina; Gregory Destras; Gwendolynne Burfin; Hadrien Regue; Laurence Josset; Martine Valette; Quentin Semanas                                                                                                                                                                                                                                                                                                                                                                                                                                                                                                                                                                                                                                                                                                                                                                                                                                                                                                                                                                                                                                                                                                                                                                                                                                                                                                                                                                                                                                                                                          |
| EPI_ISL_2142689                                                                                                                                                                                                             | HOPITAL SAINT ANDRE                                                                                                                                              | CNR Virus des Infections Respiratoires - France SUD                                                                                                              | Antonin Bal; Bruno Lina; Gregory Destras; Gwendolynne Burfin; Hadrien Regue; Laurence Josset; Martine Valette; Quentin Semanas                                                                                                                                                                                                                                                                                                                                                                                                                                                                                                                                                                                                                                                                                                                                                                                                                                                                                                                                                                                                                                                                                                                                                                                                                                                                                                                                                                                                                                                                                          |
| EPI_ISL_2105676                                                                                                                                                                                                             | HOSP MUN DE MOGI DAS CRUZES PREF WALDEMAR COSTA FILHO                                                                                                            | Instituto Butantan / Mendelics                                                                                                                                   | Antonio Jorge Martins; Bianca Cechetto Carlos. Mendelics: Bibiana Santos; Claudia Renata dos Santos Barros; Cintia Bittar; David Schlesinger; Hemocentro Ribeirão Preto; Simone Kashima; Debora Botequiu Moretti; Elaine Cristina Marquize; Elaine Vieira dos Santos; Elisângela Chicaroni Mattos; Erika Freitas; Evandra Strazza Rodrigues; Felipe Allan da Silva da Costa; Flavia Aburjaile; Fábio Sossai Possebon; Guilherme Campos; Guilherme Targino Valente; Heidge Fukumasu. USP-Botucatu: Rejane Maria Tommasini Grotto; Helena Lage Ferreira; Instituto Butantan: Dimas Tadeu Covas; Jardelina de Souza Todao Bernardino; Jayme A. Souza-Neto; Jessika Cristina Chagas Lesbon; Jorge A. Petrolini Marchesi; José Salvatore Leister Patané; João Paulo Kitajima; João Pessoa Araújo Jr.; Leila Sabrina Ullmann; Loyze Paola Oliveira de Lima; Luiz Aurelio de Campos Crispin. Centro de Genômica Funcional da ESALQ: Luiz Lehmann Coutinho; Luiz Carlos Junior de Alcantara; Lívia Sacchetto; Maísa C. Pereira Parra; Maria Carolina Elias; Marcia Giovanetti; Marília Moraes; Maurício Lacerda Nogueira. Prefeitura de Sao Paulo: Melissa Palmieri.; Patricia Akemi Assato; Paula Rahal; Paulo Inacio da Costa; Rafael dos Santos Bezerra; Raquel de Lello Rocha Campos Cassano. NGS Soluções Genômicas: Pilar Drummond Sampaio Corrêa Mariani. FZEA-USP Pirassununga: Mirele Daiana Poletti; Raul Machado Neto; Ricardo Augusto Brassaloti; Ricardo Haddad; Rodrigo Tocantins Calado. FAMERP-SJRP: Cecília Artico Banho; Sandra Coccuzzo Sampaio; Svetoslav Naney Slavov; Vagner Fonseca; Vincent Louis Viala |
| EPI_ISL_1067611, EPI_ISL_1196433                                                                                                                                                                                            | HOSPITAL DR. ENRIQUE BALTODANO BRICEÑO                                                                                                                           | ICIENSA, Instituto Costarricense de Investigación y Enseñanza en Nutrición y Salud                                                                               | Adriana Godínez; Caterina Guzmán; Claudio Soto-Garita; Estela Cordero; Francisco Duarte; Hebleen Porras; Melany Calderón; Melany Calderón & Adriana Bermúdez-Espinoza; Nazareth Ruiz & Mariel López                                                                                                                                                                                                                                                                                                                                                                                                                                                                                                                                                                                                                                                                                                                                                                                                                                                                                                                                                                                                                                                                                                                                                                                                                                                                                                                                                                                                                     |
| EPI_ISL_1379426                                                                                                                                                                                                             | HOSPITAL DR. MAX PERALTA JIMENEZ                                                                                                                                 | ICIENSA, Instituto Costarricense de Investigación y Enseñanza en Nutrición y Salud                                                                               | Adriana Godínez; Claudio Soto-Garita; Estela Cordero; Francisco Duarte; Hebleen Porras; Melany Calderón & Mónica Charpentier-Artavia                                                                                                                                                                                                                                                                                                                                                                                                                                                                                                                                                                                                                                                                                                                                                                                                                                                                                                                                                                                                                                                                                                                                                                                                                                                                                                                                                                                                                                                                                    |
| EPI_ISL_2103404                                                                                                                                                                                                             | HOSPITAL DR. MAX TERAN VALLS                                                                                                                                     | ICIENSA, Instituto Costarricense de Investigación y Enseñanza en Nutrición y Salud                                                                               | Adriana Godínez; Caterina Guzmán; Claudio Soto-Garita; Estela Cordero; Francisco Duarte; Hebleen Porras; Joselyn Prado; José Luis Vargas; Mariela Gutiérrez; Melany Calderón; Nazareth Ruiz & María José Gómez-Umaña                                                                                                                                                                                                                                                                                                                                                                                                                                                                                                                                                                                                                                                                                                                                                                                                                                                                                                                                                                                                                                                                                                                                                                                                                                                                                                                                                                                                    |
| EPI_ISL_1712392                                                                                                                                                                                                             | HOSPITAL DR. TONY FACIO CASTRO                                                                                                                                   | ICIENSA, Instituto Costarricense de Investigación y Enseñanza en Nutrición y Salud                                                                               | Adriana Godínez; Claudio Soto-Garita; Estela Cordero; Francisco Duarte; Hebleen Porras; Joselyn Prado & Marcela Rodríguez-Gómez; José Luis Vargas; Mariela Gutiérrez; Melany Calderón                                                                                                                                                                                                                                                                                                                                                                                                                                                                                                                                                                                                                                                                                                                                                                                                                                                                                                                                                                                                                                                                                                                                                                                                                                                                                                                                                                                                                                   |
| EPI_ISL_1827530, EPI_ISL_2103382, EPI_ISL_2103386, EPI_ISL_2103399                                                                                                                                                          | HOSPITAL METROPOLITANO                                                                                                                                           | ICIENSA, Instituto Costarricense de Investigación y Enseñanza en Nutrición y Salud                                                                               | Adriana Godínez; Caterina Guzmán; Claudio Soto-Garita; Estela Cordero; Francisco Duarte; Hebleen Porras; Joselyn Prado; Joselyn Prado & Margarita Lee-Lui; José Luis Vargas; Mariela Gutiérrez; Melany Calderón; Nazareth Ruiz & Margarita Lee-Lui                                                                                                                                                                                                                                                                                                                                                                                                                                                                                                                                                                                                                                                                                                                                                                                                                                                                                                                                                                                                                                                                                                                                                                                                                                                                                                                                                                      |
| EPI_ISL_2103406                                                                                                                                                                                                             | HOSPITAL SAN FRANCISCO DE ASIS                                                                                                                                   | ICIENSA, Instituto Costarricense de Investigación y Enseñanza en Nutrición y Salud                                                                               | Adriana Godínez; Caterina Guzmán; Claudio Soto-Garita; Estela Cordero; Francisco Duarte; Hebleen Porras; José Luis Vargas; Mariela Gutiérrez; Melany Calderón; Nazareth Ruiz & Joselyn Prado                                                                                                                                                                                                                                                                                                                                                                                                                                                                                                                                                                                                                                                                                                                                                                                                                                                                                                                                                                                                                                                                                                                                                                                                                                                                                                                                                                                                                            |
| EPI_ISL_682254                                                                                                                                                                                                              | HOSPITAL SAN JUAN DE DIOS                                                                                                                                        | ICIENSA, Instituto Costarricense de Investigación y Enseñanza en Nutrición y Salud                                                                               | Adriana Godínez & Melany Calderon; Claudio Soto-Garita; Estela Cordero; Francisco Duarte; Hebleen Porras                                                                                                                                                                                                                                                                                                                                                                                                                                                                                                                                                                                                                                                                                                                                                                                                                                                                                                                                                                                                                                                                                                                                                                                                                                                                                                                                                                                                                                                                                                                |
| EPI_ISL_1960044                                                                                                                                                                                                             | HPTU                                                                                                                                                             | Universidad Nacional de Colombia - Laboratorio Genómico One Health                                                                                               | Andres F. Cardona-Rios; Carlos Franco-Muñoz; Carolina Muñoz-Arango; Celeny Ortiz; Daniel O. Maldonado-Perez; Diego A. Álvarez-Díaz; Hector Alejandro Ruiz-Moreno; Idabely Betancur Ortiz; Jorge E. Osorio; Juan P. Hernandez-Ortiz; Karl A Ciudodis; Katherine Laiton-Donato; Laura Silvana Perez; Lina M. Hurtado; Marcela Mercado-Reyes; Maria Angélica Maya; Maria Stella López; Rita Almanza Payares; Sandra Ines Cano; Simón Villegas Velásquez                                                                                                                                                                                                                                                                                                                                                                                                                                                                                                                                                                                                                                                                                                                                                                                                                                                                                                                                                                                                                                                                                                                                                                    |
| EPI_ISL_2193736                                                                                                                                                                                                             | Hackensack Medical Center                                                                                                                                        | New York Genome Center                                                                                                                                           | Andre Corvelo; Barry Kreiswirth; David Perlin; Dayna M. Oschwald; Jose Mediavilla; Kaelea Composto; Kar Chow; Liang Chen; Marcus Cunningham; Michael Zody; Samantha Fennessey; Tom Maniatis                                                                                                                                                                                                                                                                                                                                                                                                                                                                                                                                                                                                                                                                                                                                                                                                                                                                                                                                                                                                                                                                                                                                                                                                                                                                                                                                                                                                                             |
| EPI_ISL_2096776                                                                                                                                                                                                             | Hadassah Medical Center Clinical Virology Laboratory, Hadassah Ein Kerem                                                                                         | Hadassah Hebrew University Viral Sequencing Group, Hadassah Hebrew University Medical Center                                                                     | Dana G. Wolf; Esther Oiknine-Djian; Hadar Golan Berman; Mila Rivkin; Sheera Adar                                                                                                                                                                                                                                                                                                                                                                                                                                                                                                                                                                                                                                                                                                                                                                                                                                                                                                                                                                                                                                                                                                                                                                                                                                                                                                                                                                                                                                                                                                                                        |
| EPI_ISL_1268859                                                                                                                                                                                                             | Hannover Medical School, Institute of Virology                                                                                                                   | Hannover Medical School, Institute of Virology                                                                                                                   | Lars Steinbrück                                                                                                                                                                                                                                                                                                                                                                                                                                                                                                                                                                                                                                                                                                                                                                                                                                                                                                                                                                                                                                                                                                                                                                                                                                                                                                                                                                                                                                                                                                                                                                                                         |
| EPI_ISL_2004107                                                                                                                                                                                                             | Health sciences Department, Universidad Técnica Particular de Loja                                                                                               | Institute of Microbiology, Universidad San Francisco de Quito                                                                                                    | Belén Prado-Vivar; Bernardo Gutiérrez; Danilo Sosa; Fernando Serrano; Gabriel Trueba; Juan José Guadalupe; Katty Ojeda; Michelle Grunauer; Monica Becerra-Wong; Paola Dalgo; Patricio Rojas-Silva; Paúl Cárdenas; Rita Rodríguez; Sully Márquez; Verónica Barragán                                                                                                                                                                                                                                                                                                                                                                                                                                                                                                                                                                                                                                                                                                                                                                                                                                                                                                                                                                                                                                                                                                                                                                                                                                                                                                                                                      |
| EPI_ISL_796014                                                                                                                                                                                                              | Hebei Provincial Center for Disease Control and Prevention, Shijiazhuang, Hebei Province; National Institute for Viral Disease Control and Prevention, China CDC | Hebei Provincial Center for Disease Control and Prevention, Shijiazhuang, Hebei Province; National Institute for Viral Disease Control and Prevention, China CDC | George F. Gao; Nankun Liu; Qi Li; Shunxiang Qi; Wenbo Xu; Xiang Zhao; Yang Song                                                                                                                                                                                                                                                                                                                                                                                                                                                                                                                                                                                                                                                                                                                                                                                                                                                                                                                                                                                                                                                                                                                                                                                                                                                                                                                                                                                                                                                                                                                                         |
| EPI_ISL_1262184, EPI_ISL_1267805, EPI_ISL_1270341, EPI_ISL_1337196, EPI_ISL_1337298, EPI_ISL_1338280, EPI_ISL_1421179, EPI_ISL_1554209, EPI_ISL_1592458, EPI_ISL_1803617, EPI_ISL_1818014, EPI_ISL_2097465, EPI_ISL_2160373 | see above                                                                                                                                                        | Centers for Disease Control and Prevention Division of Viral Diseases, Pathogen Discovery                                                                        | Adrian Paskey; Alexandre Bolze; Ary Ascencio; Ben L. Rambo-Martin; Benjamin Rambo-Martin; Brad Sickler; Charlotte Rivera-Garcia; Christine Tran; Christopher Gulwick; Clinton R. Paden; Dakota Howard; Darlene Wagner; David Becker; Dhvani Batra; Duncan MacCannell; Efrén Sandoval; Eileen de Feo; Elizabeth Cirulli; Eric Allen; Geraint Levan; James Lu; Jan Antico; Jason Caravas; Jason Nguyen; Jimmy Ramirez; Jingtao Liu; Kara Moser; Kelly Schiabor Barrett; Kim Gietzen; Magnus Isaksson; Marc Laurent; Matthew Schmeurer; Matthew Tolentino; Nicole L. Washington; Peter W. Cook; Phil Febbo; Ryan Cho; Scott Sammons; Shannon Wickline; Shatavia Morrison; Sherry Wang; Simon White; Summer Galloway; Suxiang Tong; Tyler Cassens; William Lee; Yvette Unoarumhi                                                                                                                                                                                                                                                                                                                                                                                                                                                                                                                                                                                                                                                                                                                                                                                                                                            |
| EPI_ISL_966648, EPI_ISL_966687, EPI_ISL_966962, EPI_ISL_1134579                                                                                                                                                             | Helix/Illumina                                                                                                                                                   | Respiratory Viruses Branch, Division of Viral Diseases, Centers for Disease Control and Prevention                                                               | ; Alexandre Bolze; Ary Ascencio; Ben L. Rambo-Martin; Brad Sickler; Charlotte Rivera-Garcia; Christine Tran; Clinton R. Paden; Dakota Howard; David Becker; Dhvani Batra; Duncan MacCannell; Efrén Sandoval; Eileen de Feo; Elizabeth Cirulli; Eric Allen; Geraint Levan; James Lu; Jan Antico; Jason Nguyen; Jimmy Ramirez; Jingtao Liu; Kelly Schiabor Barrett; Kim Gietzen; Magnus Isaksson; Marc Laurent; Matthew Tolentino; Nicole L. Washington; Peter W. Cook; Phil Febbo; Ryan Cho; Shannon Wickline; Sherry Wang; Simon White; Summer Galloway; Suxiang Tong; Tyler Cassens; William Lee                                                                                                                                                                                                                                                                                                                                                                                                                                                                                                                                                                                                                                                                                                                                                                                                                                                                                                                                                                                                                       |
| EPI_ISL_450529                                                                                                                                                                                                              | Hematology Laboratory, Section of Molecular Diagnostics, University Clinical Centre, Medical University of Gdansk                                                | Department of Virology, Faculty of Medicine, University of Helsinki, Helsinki, Finland                                                                           | Aneta Szulc; Maciej Grzybek; Marlena Robakowska; Olii Vapalahti; Teemu Smura                                                                                                                                                                                                                                                                                                                                                                                                                                                                                                                                                                                                                                                                                                                                                                                                                                                                                                                                                                                                                                                                                                                                                                                                                                                                                                                                                                                                                                                                                                                                            |
| EPI_ISL_1229401                                                                                                                                                                                                             | Hematology Laboratory, Section of Molecular Diagnostics, University Clinical Centre, Medical University of Gdansk                                                | Laboratory of Recombinant Vaccines                                                                                                                               | Adam Sodoł; Aneta Szulc; Bogusław Szewczyk; Ewa Miłosz; Krystyna Bienkowska-Szewczyk; Krzysztof Lewandowski; Lukasz Rabalski; Maciej Grzybek; Maciej Kosinski; Marlena Robakowska                                                                                                                                                                                                                                                                                                                                                                                                                                                                                                                                                                                                                                                                                                                                                                                                                                                                                                                                                                                                                                                                                                                                                                                                                                                                                                                                                                                                                                       |
| EPI_ISL_699991                                                                                                                                                                                                              | Hematopathology Laboratory, ACTREC, TMC                                                                                                                          | Hematopathology Laboratory, ACTREC, TMC                                                                                                                          | ACTREC; Hematopathology Laboratory                                                                                                                                                                                                                                                                                                                                                                                                                                                                                                                                                                                                                                                                                                                                                                                                                                                                                                                                                                                                                                                                                                                                                                                                                                                                                                                                                                                                                                                                                                                                                                                      |
| EPI_ISL_1196014                                                                                                                                                                                                             | Homecare                                                                                                                                                         | National Institute for Communicable Diseases of the National Health Laboratory Service                                                                           | Amoako DG; Bhiman JN; Ismail A; Mahlangu B; Maphalala GP; Mohale T; Ntuli N; Scheepers C                                                                                                                                                                                                                                                                                                                                                                                                                                                                                                                                                                                                                                                                                                                                                                                                                                                                                                                                                                                                                                                                                                                                                                                                                                                                                                                                                                                                                                                                                                                                |
| EPI_ISL_476803                                                                                                                                                                                                              | Hong Kong Department of Health                                                                                                                                   | School of Public Health, The University of Hong Kong                                                                                                             | Daniel K.W. Chu; Dominic N.C. Tsang; Leo L.M. Poon; Malik Peiris                                                                                                                                                                                                                                                                                                                                                                                                                                                                                                                                                                                                                                                                                                                                                                                                                                                                                                                                                                                                                                                                                                                                                                                                                                                                                                                                                                                                                                                                                                                                                        |
| EPI_ISL_1201507                                                                                                                                                                                                             | Hopital                                                                                                                                                          | National Reference Center for Viruses of Respiratory                                                                                                             | Angela Brisebarre; Camille Capel; Durivault Jérôme; Etienne Simon-Lorière; Marion Barbet; Maud Vanpeene; Méline Bizard; Sylvie Behillil; Sylvie van der                                                                                                                                                                                                                                                                                                                                                                                                                                                                                                                                                                                                                                                                                                                                                                                                                                                                                                                                                                                                                                                                                                                                                                                                                                                                                                                                                                                                                                                                 |

|                                                                    |                                                                                |                                                                                                                                |                                                                                                                                                                                                                                                                                                                                                                                                                                                                                                                                                            |
|--------------------------------------------------------------------|--------------------------------------------------------------------------------|--------------------------------------------------------------------------------------------------------------------------------|------------------------------------------------------------------------------------------------------------------------------------------------------------------------------------------------------------------------------------------------------------------------------------------------------------------------------------------------------------------------------------------------------------------------------------------------------------------------------------------------------------------------------------------------------------|
|                                                                    |                                                                                | Infections, Institut Pasteur, Paris                                                                                            | Werf; Vincent Enouf                                                                                                                                                                                                                                                                                                                                                                                                                                                                                                                                        |
| EPI_ISL_1257882, EPI_ISL_1257884, EPI_ISL_1257886, EPI_ISL_1790069 | Hopital Général de Douala                                                      | Institut Pasteur de Dakar                                                                                                      | Carniel Elisabeth; Dia Ndongo; Diagne Moussa Moïse; Diallo Amadou; Diop Mamadou; Elisabeth Carniel; Faye Ousmane; Loucoubar Cheikh; Ndiaye Ndack; Njoum Richard; Sall Amadou Alpha; Sankhe Safietou                                                                                                                                                                                                                                                                                                                                                        |
| EPI_ISL_560606                                                     | Hospital                                                                       | National Reference Center for Viruses of Respiratory Infections, Institut Pasteur, Paris                                       | Etienne Simon-Lorière; Fabiana Gambaro; Maud Vanpeene; Sylvie Behillil; Sylvie van der Werf; Vincent Enouf                                                                                                                                                                                                                                                                                                                                                                                                                                                 |
| EPI_ISL_1383817, EPI_ISL_1383876                                   | Hospital Center Emile Mayrisch                                                 | Laboratoire national de sante, Microbiologie, Microbial Genomics Platform                                                      | Anke Wienecke-Baldacchino; Catherine Ragimbeau; Cynthia Oxacelay; Fatu Djabi; Jessica Tapp; Lise Pignon; Raoul Salmon; Tamir Abdelrahman                                                                                                                                                                                                                                                                                                                                                                                                                   |
| EPI_ISL_491441                                                     | Hospital Clinica Biblica                                                       | Incienza, Instituto Costarricense de Investigación y Enseñanza en Nutrición y Salud                                            | Adriana Godínez & Melany Calderon; Claudio Soto-Garita; Estela Cordero; Francisco Duarte; Hebleen Brenes                                                                                                                                                                                                                                                                                                                                                                                                                                                   |
| EPI_ISL_481041, EPI_ISL_1272517                                    | Hospital General Universitario Gregorio Marañón                                | SeqCOVID-SPAIN consortium/IBV(CSIC)                                                                                            | Dario García de Viedma; Dario García de Viedma and SeqCOVID-SPAIN consortium; Jon Sicilia; Julia Suárez; Laura Pérez-Lago; Marta Herranz; Patricia Muñoz; Patricia Muñoz and SeqCOVID-SPAIN consortium; Pedro J Sola-Campoy; Pilar Catalán; Sergio Buenestado-Serrano; Victor Manuel de la Cueva                                                                                                                                                                                                                                                           |
| EPI_ISL_2014355                                                    | Hospital Herrera Llerandi                                                      | Asociación de Salud Integral/Clinica Familiar Luis Ángel García                                                                | Ana S. Gonzalez-Reiche; Claudia Rangel; Danicela Mercado; Eduardo Arathoon; Hilda Ruiz; Luis Aguirre; Luis Rivas; Narda Medina; Oscar Bonilla; Osmar Gamboa.                                                                                                                                                                                                                                                                                                                                                                                               |
| EPI_ISL_412964                                                     | Hospital Israelita Albert Einstein                                             | Instituto Adolfo Lutz Interdisciplinary Procedures Center Strategic Laboratory                                                 | Andrew Rambaut; Claudia Regina Gonçalves; Claudio Tavares Sacchi; Daniela Bernardes Borges da Silva; Ester Cerdeira Sabino; Flávia Cristina da Silva Sales; Ingra Morales Claro; Jaqueline Goes de Jesus; Joshua Quick; Maria do Carmo; Nicholas James Loman; Nuno Rodrigues Faria; Sampaio Tavares Timenetsky                                                                                                                                                                                                                                             |
| EPI_ISL_413016                                                     | Hospital Israelita Albert Einstein                                             | Instituto Adolfo Lutz, Interdisciplinary Procedures Center, Strategic Laboratory                                               | Andrew Rambaut; Claudia Regina Gonçalves; Claudio Tavares Sacchi; Ester Cerdeira Sabino; Fabiana Cristina Pereira dos Santos; Flávia Cristina da Silva Sales; Ingra Morales Claro; Jaqueline Goes de Jesus; Joshua Quick; Maria do Carmo Sampaio Tavares Timenetsky; Nicholas James Loman; Nuno Rodrigues Faria                                                                                                                                                                                                                                            |
| EPI_ISL_2233382                                                    | Hospital Labuan                                                                | Institute for Medical Research, Infectious Disease Research Centre, National Institutes of Health, Ministry of Health Malaysia | Azizan MA; Kamel K; Mohd Zawawi Z; Ramly N; Robert F; Suppiah J; Thayan R                                                                                                                                                                                                                                                                                                                                                                                                                                                                                  |
| EPI_ISL_1660622                                                    | Hospital Margarita Maza de Juárez                                              | Microbial Genomics Laboratory                                                                                                  | Alejandra Garcia-Gasca; Bruno Gomez-Gil; Daniel Fregoso-Rueda; Julissa Enciso-Ibarra                                                                                                                                                                                                                                                                                                                                                                                                                                                                       |
| EPI_ISL_480313                                                     | Hospital Mexico                                                                | Charité Virology-University of Costa Rica                                                                                      | Andres Moreira-Soto; Eugenia Corrales-Aguilar; Ignacio Postigo-Hidalgo; Jan Felix Drexler; Teresita Somogyi                                                                                                                                                                                                                                                                                                                                                                                                                                                |
| EPI_ISL_480324                                                     | Hospital Nacional de Niños                                                     | Charité Virology-University of Costa Rica                                                                                      | Andrei Montero Bonilla; Andres Moreira-Soto; Cristian Pérez Corrales; Eugenia Corrales-Aguilar; Ignacio Postigo-Hidalgo; Jan Felix Drexler                                                                                                                                                                                                                                                                                                                                                                                                                 |
| EPI_ISL_1469833                                                    | Hospital Nossa Senhora das Graças                                              | Epiclin                                                                                                                        | Ana Paula Muterle; Carolina Comerlato; Eliana Márcia Da Ros Wendland; Fernando Hayashi Sant'Anna; Janira Prichula; Juliana Comerlato                                                                                                                                                                                                                                                                                                                                                                                                                       |
| EPI_ISL_1673337                                                    | Hospital Pakar Sultanah Fatimah                                                | Institute for Medical Research, Infectious Disease Research Centre, National Institutes of Health, Ministry of Health Malaysia | Kamel K; Mohd Zawawi Z; Suppiah J; Thayan R                                                                                                                                                                                                                                                                                                                                                                                                                                                                                                                |
| EPI_ISL_1303538                                                    | Hospital Presidente                                                            | Instituto Adolfo Lutz, Interdisciplinary Procedures Center, Strategic Laboratory                                               | Caio Vinicius Dias Lopes; Claudia Regina Gonçalves; Claudio Tavares Sacchi; Erica Valessa Ramos Gomes; Karoline Rodrigues Campos                                                                                                                                                                                                                                                                                                                                                                                                                           |
| EPI_ISL_1503129                                                    | Hospital Regional Anita Moreno Los Santos                                      | Gorgas Memorial Laboratory of Health Studies                                                                                   | Best Dayana; Castillo Jorge; Espino Juliee; Franco Danilo; Gonzalez Claudia; Jessica Gondola; Leyda Abrego; Lopez-Verges Sandra; Marlene Castillo; Martinez Alexander; Moreno Ambar; Moreno Brechla; Oris Chavarria; Ortiz Alma                                                                                                                                                                                                                                                                                                                            |
| EPI_ISL_1502829                                                    | Hospital Regional Dr. Luis "Chicho" Fábrega                                    | Gorgas Memorial Laboratory of Health Studies                                                                                   | Castillo Jorge; Franco Danilo; Gonzalez Claudia; Herrera Genarino; Herrera Melissa; Jessica Gondola; Leyda Abrego; Lopez-Verges Sandra; Marlene Castillo; Martinez Alexander; Moreno Ambar; Moreno Brechla; Oris Chavarria; Ortiz Alma                                                                                                                                                                                                                                                                                                                     |
| EPI_ISL_491438                                                     | Hospital San Rafael de Alajuela                                                | Incienza, Instituto Costarricense de Investigación y Enseñanza en Nutrición y Salud                                            | Adriana Godínez & Melany Calderon; Claudio Soto-Garita; Estela Cordero; Francisco Duarte; Hebleen Brenes                                                                                                                                                                                                                                                                                                                                                                                                                                                   |
| EPI_ISL_2026456, EPI_ISL_2026460                                   | Hospital Sharp                                                                 | Microbial Genomics Laboratory                                                                                                  | Alejandra Garcia-Gasca; Bruno Gomez-Gil; Daniel Fregoso-Rueda; Julissa Enciso-Ibarra                                                                                                                                                                                                                                                                                                                                                                                                                                                                       |
| EPI_ISL_1673283                                                    | Hospital Sultanah Aminah                                                       | Institute for Medical Research, Infectious Disease Research Centre, National Institutes of Health, Ministry of Health Malaysia | Kamel K; Mohd Zawawi Z; Suppiah J; Thayan R                                                                                                                                                                                                                                                                                                                                                                                                                                                                                                                |
| EPI_ISL_414016                                                     | Hospital São Joaquim Beneficencia Portuguesa                                   | Instituto Adolfo Lutz, Interdisciplinary Procedures Center, Strategic Laboratory                                               | Audrey Cilli; Carlos Henrique Camargo; Claudia Regina Gonçalves; Claudio Tavares Sacchi; Daniela Bernardes Borges da Silva; Ester Cerdeira Sabino; Maria do Carmo Sampaio Tavares Timenetsky; Terezinha Maria de Paiva                                                                                                                                                                                                                                                                                                                                     |
| EPI_ISL_824434                                                     | Hospital Universitari Vall d'Hebron - Vall d'Hebron Institut de Recerca        | Hospital Universitari Vall d'Hebron - Vall d'Hebron Institut de Recerca                                                        | Andrés Antón; Ariadna Rando; Carla Castillo; Cristina Andrés; Damir Garcia-Cehic; Josep F Abril; Josep Quer; Juliana Esperalba; Maria Carmen Martin; Maria Gema Codina; Maria Piñana; Tomás Pumarola                                                                                                                                                                                                                                                                                                                                                       |
| EPI_ISL_538043                                                     | Hospital Universitari i Politècnic La Fe de València                           | SeqCOVID-SPAIN consortium/IBV(CSIC)                                                                                            | Ana Gil Brusola; Eva González Barbera; José Luis López Hontangas and SeqCOVID-SPAIN consortium; María Dolores Gómez Ruiz; Salvador Giner Almaraz                                                                                                                                                                                                                                                                                                                                                                                                           |
| EPI_ISL_1312321                                                    | Hospital Universitario 12 de Octubre                                           | SeqCOVID-SPAIN consortium/IBV(CSIC)                                                                                            | Esther Viedma; Irene Muñoz-Gallego; Jennifer Villa; M.ª Dolores Folgueira and SeqCOVID-SPAIN consortium; Mar Aguilera; Rafael Delgado; Raúl Recio; Sagrario Zurita                                                                                                                                                                                                                                                                                                                                                                                         |
| EPI_ISL_534332                                                     | Hospital Universitario La Paz                                                  | Hospital Universitario La Paz                                                                                                  | Elias Dahdouh; Esther Viedma; Fernando Lázaro; Jesús Mingorance; Juan Carlos Galán; Julio García; Ma Dolores Folgueira; María Rodríguez; Natalia Stella; Rafael Cantón; Rafael Delgado; Raúl Recio; Sara González                                                                                                                                                                                                                                                                                                                                          |
| EPI_ISL_831192                                                     | Hospital Universitario La Paz (Madrid)                                         | SeqCOVID-SPAIN consortium/IBV(CSIC)                                                                                            | Elias Dahdouh; Fernando Lázaro-Perona; Jesús Mingorance and SeqCOVID-SPAIN consortium; María Rodríguez-Tejedor                                                                                                                                                                                                                                                                                                                                                                                                                                             |
| EPI_ISL_708125, EPI_ISL_1547577                                    | Hospital of Southern Norway - Kristiansand, Department of Medical Microbiology | Norwegian Institute of Public Health, Department of Virology                                                                   | Atiya R Ali; Debech Nadia; Engebretsen Serina Beate; Garcia Llorente Ignacio; Hilde Elshaug; Hilde Vollan; Jon Bråte; Kamilla Heddeland Instefjord; Karoline Bragstad; Kathrine Stene-Johansen; Marie Paulsen Madsen; Olav Hungnes; Pedersen Benedikte Nevjen; Rasmus Riis Kopperud                                                                                                                                                                                                                                                                        |
| EPI_ISL_1511448                                                    | Hospital of the University of Pennsylvania Molecular Pathology Lab             | Bushman Lab - University of Pennsylvania                                                                                       | Abigail Glascock; Aoife M. Roche; Arupa Ganguly; Ayanah S. Fitzgerald; Brendan Kelly; Jevon Graham-Wooten; John Everett; Kyle Rodino; Layla A. Khatib; Mike Feldman; Pascha Hokama; Ronald G. Collman and Frederic Bushman; Samantha A. Whiteside; Scott Sherrill-Mix; Shantan Reddy; Young Hwang                                                                                                                                                                                                                                                          |
| EPI_ISL_542574, EPI_ISL_2225471                                    | Houston Methodist Hospital                                                     | Houston Methodist Hospital                                                                                                     | Chia-Wei Chou; Concepcion C. Cantu; Daniel Boutz; David W. Bernard; Ghazaleh Eskandari; Heather Hendrickson; Hoang A. T. Nguyen; Hung-Che Kuo; Ilya J. Finkelstein; J. Hunter Long; James J. Davis; Jason S. McLellan; Jessica Cambric; Jimmy Gollihar; Jule Goike; Kamyab Javanmard; Kristina Reppond; Layne Pruitt; Madison N. Shyer; Marcus Nguyen; Matthew Ojeda Saavedra; Maulik Shukla; Muthiah Kumaraswami; Paul A. Christensen; Prasanti Yerramilli; Randall J. Olsen; Robert Olson; Ryan Gadd; S. Wesley Long; Sishir Subedi; and James M. Musser |
| EPI_ISL_1041199, EPI_ISL_1041201, EPI_ISL_1041206, EPI_ISL_1041207 | Hungarian Defence Forces Military Medical Centre                               | National Laboratory of Virology, Szentágotthai Research Centre                                                                 | Balázs Somogyi; Csaba Pereszlényi; Endre Gábor Tóth; Ferenc Jakab; Gábor Kemenesi; Ágnes Balázs-Nagy                                                                                                                                                                                                                                                                                                                                                                                                                                                       |
| EPI_ISL_529961                                                     | Husada Utama Hospital                                                          | Institute of Tropical Disease, Universitas Airlangga                                                                           | Aldise M Nastri; Didi Dewanto; Gatot Soegiarto; Jezzy R Dewantari; Kazufumi Shimizu; Krisnoadi Rahardjo; Laksmi Wulandari; Maria I Lusida; Mitsuhiro Nishimura; Resti Yudhawati; Retno A Setyoningrum; Rima R Prasetya; Soetjpto; Yasuko Mori; Yohko K Shimizu                                                                                                                                                                                                                                                                                             |
| EPI_ISL_940203, EPI_ISL_940346, EPI_ISL_940542                     | Hôpital Bichat Claude Bernard, Laboratoire de Virologie                        | IAME UMR1137 Inserm, Université de Paris, Hôpital Bichat                                                                       | Alexandre Storto; Amélie Recoing; Antoine Bridier-Nahmias; Benoit Visseaux; Charlotte Charpentier; Diane Descamps; Gilles Collin; Lena Daniel; Mélanie Bertine; Nadhira Houhou-Fidouh; Quentin Le Hingrat; Siham Hamri                                                                                                                                                                                                                                                                                                                                     |
| EPI_ISL_710575                                                     | Hôpital Fattouma-Bourguiba de Monastir                                         | Laboratoire des Procédés de Criblage Moléculaire et Cellulaire-Centre de Biotechnologie de Sfax                                | A. and Masmoudi, S.; Abdelmoulah, F.; Abid, N.; Ajili, F.; Aouni, M.; Ben Ayed, I.; Bensaïd, M.; Chtourou, A.; Elargoubi, A.; Fki-berrajah, L.; Gaaloul, I.; Gargouri, S.; Hammami, A.; Kamoun, S.; Karray Hakim, H.; Kharat, N.; Mastouri, M.; Mhalla, S.; Nabli, A.; Rebai, Smeti, I.; Souissi, A.; Stambouli, N.; Turki, M.                                                                                                                                                                                                                             |
| EPI_ISL_961584, EPI_ISL_961624,                                    | Hôpital Georges L. Dumont                                                      | National Microbiology Laboratory (NML)                                                                                         | Anna Majer; Anneliese Landgraff; CanCOGeN's metadata curation team; Darian Hole; Elsie Grudeski; Gary Van Domselaar; Grace Seo; Guillaume                                                                                                                                                                                                                                                                                                                                                                                                                  |

|                                                                                                                                                                                                                                                                                                                  |                                                                                     |                                                                                                                                            |                                                                                                                                                                                                                                                                                                                                                                                                                                                                                                                                                                           |
|------------------------------------------------------------------------------------------------------------------------------------------------------------------------------------------------------------------------------------------------------------------------------------------------------------------|-------------------------------------------------------------------------------------|--------------------------------------------------------------------------------------------------------------------------------------------|---------------------------------------------------------------------------------------------------------------------------------------------------------------------------------------------------------------------------------------------------------------------------------------------------------------------------------------------------------------------------------------------------------------------------------------------------------------------------------------------------------------------------------------------------------------------------|
| EPI_ISL_1164967                                                                                                                                                                                                                                                                                                  |                                                                                     |                                                                                                                                            | Desnoyers; Jennifer Tanner; Kirsten Biggar; Madison Chapel; Morag Graham; Natalie Knox; Nathalie Bastien; Philip Mabon; Public Health Agency of Canada CanCOGeN team; Rhiannon Huzarewicz; Richard Garceau; Russell Mandes; Shari Tyson; Timothy Booth; Yan Li                                                                                                                                                                                                                                                                                                            |
| EPI_ISL_1085877                                                                                                                                                                                                                                                                                                  | Hôpital Saint-Louis                                                                 | Department of Virology, Henri Mondor University Hospital, Assistance Publique Hôpitaux de Paris, Université Paris-Est Créteil, INSERM U955 | Alexandre Soulier; Christophe Rodriguez; Elisabeth Trawinski; Guillaume Gricourt; Jean-Michel Pawlotsky; Melissa N'Debi; Slim Fourati; Vanessa Demontant                                                                                                                                                                                                                                                                                                                                                                                                                  |
| EPI_ISL_653774                                                                                                                                                                                                                                                                                                   | I.R.C.C.S. "S. De Bellis" - Ente Ospedaliero                                        | Istituto Zooprofilattico Sperimentale della Puglia e della Basilicata                                                                      | Bianco A.; Capozzi L.; Del Sambro L.; Lippolis A.; Manzulli V; Notarnicola M.; Pace L.; Parisi A.; Rondinone V.                                                                                                                                                                                                                                                                                                                                                                                                                                                           |
| EPI_ISL_1272937                                                                                                                                                                                                                                                                                                  | IA State Hygienic Laboratory                                                        | Centers for Disease Control and Prevention Division of Viral Diseases, Pathogen Discovery                                                  | Anna Montmayeur; Anna Uehara; Ben L. Rambo-Martin; Clinton R. Paden; Dhvani Batra; Haibin Wang; Jasmine Padilla; Jing Zhang; Justin Lee; Katie Dillon; Krista Queen; Kristen Knipe; Kristine Lacek; Lori Rowe; Mark Burroughs; Matthew Schmeer; Mili Sheth; Peter W. Cook; Rachel Marine; Sam Shepard; Sarah Nobles; Shoshona Le; Suxiang Tong; Yan Li; Ying Tao                                                                                                                                                                                                          |
| EPI_ISL_1094687                                                                                                                                                                                                                                                                                                  | IA State Hygienic Laboratory                                                        | Respiratory Viruses Branch, Division of Viral Diseases, Centers for Disease Control and Prevention                                         | Anna Montmayeur; Anna Uehara; Ben L. Rambo-Martin; Clinton R. Paden; Dhvani Batra; Haibin Wang; Jasmine Padilla; Jing Zhang; Justin Lee; Krista Queen; Lori Rowe; Mark Burroughs; Mili Sheth; Peter W. Cook; Rachel Marine; Sarah Nobles; Suxiang Tong; Yan Li; Ying Tao                                                                                                                                                                                                                                                                                                  |
| EPI_ISL_1703934, EPI_ISL_1704443, EPI_ISL_1704466, EPI_ISL_1928515, EPI_ISL_2131525, EPI_ISL_2131548, EPI_ISL_2131563                                                                                                                                                                                            | see above                                                                           | ICMR-National Institute of Virology - INSACOG                                                                                              | NIV Influenza                                                                                                                                                                                                                                                                                                                                                                                                                                                                                                                                                             |
| EPI_ISL_1091780, EPI_ISL_1824703                                                                                                                                                                                                                                                                                 | ICMT                                                                                | Universidad Nacional de Colombia - Laboratorio Genómico One Health                                                                         | Dr. Varsha Potdar                                                                                                                                                                                                                                                                                                                                                                                                                                                                                                                                                         |
| EPI_ISL_2234873, EPI_ISL_2234874, EPI_ISL_2234875, EPI_ISL_2234877, EPI_ISL_2234878, EPI_ISL_2234879, EPI_ISL_2234886, EPI_ISL_2234887, EPI_ISL_2234888, EPI_ISL_2234890, EPI_ISL_2234891, EPI_ISL_2234892, EPI_ISL_2234894, EPI_ISL_2234897, EPI_ISL_2234898, EPI_ISL_2234899, EPI_ISL_2234904, EPI_ISL_2234905 | see above                                                                           | IICS-UNA                                                                                                                                   | IICS-UNA                                                                                                                                                                                                                                                                                                                                                                                                                                                                                                                                                                  |
| EPI_ISL_914033                                                                                                                                                                                                                                                                                                   | IL Department of Public Health Springfield Laboratory                               | Pathogen Discovery, Respiratory Viruses Branch, Division of Viral Diseases, Centers for Disease Control and Prevention                     | Adriana Valenzuela; Alejandra Rojas; Chyntia Diaz; Eva Nara; Fatima Cardozo; Florencia del Puerto; Joel Ortiz; Jonas Fernandez; Laura Franco; Laura Mendoza; Leticia Rojas; Magaly Martinez; Maria Eugenia Galeano                                                                                                                                                                                                                                                                                                                                                        |
| EPI_ISL_1495584                                                                                                                                                                                                                                                                                                  | IMP - Research Institute of Molecular Pathology                                     | Bergthaler laboratory, CeMM Research Center for Molecular Medicine of the Austrian Academy of Sciences                                     | Anna Uehara; Clinton R. Paden; Haibin Wang; Jing Zhang; Krista Queen; Peter Cook; Suxiang Tong; Yan Li; Ying Tao                                                                                                                                                                                                                                                                                                                                                                                                                                                          |
| EPI_ISL_1213196, EPI_ISL_1213350                                                                                                                                                                                                                                                                                 | IMT-UFRN/RN                                                                         | Bioinformatics Laboratory / LNCC                                                                                                           | Andreas Bergthaler; Anna Schedl; Bekir Erguner; Benedikt Agerer; Christoph Bock; Fabian Amman; Jan Laine; Lukas Endler; Maelle Le Moing; Martin Senekowitsch; Michael Schuster; Petr Triska; Thomas Penz                                                                                                                                                                                                                                                                                                                                                                  |
| EPI_ISL_2134587                                                                                                                                                                                                                                                                                                  | IN State Department of Health Laboratory Services                                   | IN State Department of Health Laboratory Services                                                                                          | Alessandra P Lamarca; Alexandra L Gerber; Ana Paula Melo Mariano; Ana Paula de C Guimarães; Ana Tereza R Vasconcelos; Angela Maria Guimarães Santos; Bianca Mendes Maciel; Danielle Angst Secco; Eduardo Sérgio Soares Sousa; Eloiza Helena Campana; Francisco Paulo Freire Neto; George Rego Albuquerque; Kátia Castanho Scortecchi; Lucymara Fassarella Agnez Lima; Luiz G P de Almeida; Luís Cristóvão Porto; Otavio J. Brustolini; Paulo Ricardo Nascimento; Ronaldo da Silva Francisco Jr; Sandra Rocha Gadelha; Selma Maria Bezerra Jeronimo; Vinicius Pietta Perez |
| EPI_ISL_1576833, EPI_ISL_1576834, EPI_ISL_1577798, EPI_ISL_1577816                                                                                                                                                                                                                                               | INHRR                                                                               | Laboratorio de Virología Molecular                                                                                                         | Brian Pope; Cassandra Campion; Jamie Yeadon; Kyle Brownlee; Lixia Liu; Mark Glazier; Melissa Hindenlang                                                                                                                                                                                                                                                                                                                                                                                                                                                                   |
| EPI_ISL_603184                                                                                                                                                                                                                                                                                                   | INMI Lazzaro Spallanzani IRCCS                                                      | INMI Lazzaro Spallanzani IRCCS                                                                                                             | Aguilar M; Alarcon V; D Angelo P; Delgado M; Garzaro D; Jaspe RC; Loureiro CL; Pujol FH; Rangel HR; Rodriguez L; Zambrano JL                                                                                                                                                                                                                                                                                                                                                                                                                                              |
| EPI_ISL_1109633                                                                                                                                                                                                                                                                                                  | INNO Diagnostics Reference Laboratory                                               | RCMI-Center for Research Resources, Ponce Research Institute                                                                               | Antonino Di Caro; Barbara Bartolini; Cesare E.M. Gruber; Emanuela Giombini; Francesco Messina; Maria R. Capobianchi; Martina Rueca; Simone Lanini                                                                                                                                                                                                                                                                                                                                                                                                                         |
| EPI_ISL_1419218, EPI_ISL_1419424, EPI_ISL_1419462, EPI_ISL_1419737, EPI_ISL_1589855                                                                                                                                                                                                                              | INSACOG-WB                                                                          | National Institute of Biomedical Genomics - INSACOG                                                                                        | Andrea Arias-García; Raphael Sánchez-Torres; Vanessa Rivera-Amill                                                                                                                                                                                                                                                                                                                                                                                                                                                                                                         |
| EPI_ISL_826836                                                                                                                                                                                                                                                                                                   | INSPI-CRN DE INFLUENZA Y OTROS VIRUS RESPIRATORIOS                                  | Instituto de Salud Publica de Chile                                                                                                        | Ajay Chakraborti; Arindam Maitra; Bhaswati Bandyopadhyay; Nidhan Kumar Biswas; Saumitra Das; Sreedhar Chinnaswamy; Tamal Ghosh                                                                                                                                                                                                                                                                                                                                                                                                                                            |
| EPI_ISL_1968648                                                                                                                                                                                                                                                                                                  | INTERLAB                                                                            | Omics Sciences Laboratory                                                                                                                  | Alfredo Bruno; Andres Castillo; Barbara Parra; Domenica de Mora; Gisselle Barra; Jaime Lagos; Javier Tognarelli; Jimmy Garcez; Jorge Fernandez; Loredana Arata; Manuel Gonzalez; Martiza Olmedo; Michelle Paez; Patricia Bustos; Rodrigo Fasce; Solon Narvaez                                                                                                                                                                                                                                                                                                             |
| EPI_ISL_1661919, EPI_ISL_1663577                                                                                                                                                                                                                                                                                 | IU-Cerrahpasa, Cerrahpasa School of Medicine, COVID-19 Lab                          | IU-Cerrahpasa, Cerrahpasa School of Medicine, COVID-19 Lab                                                                                 | Darlyn Amaya; Derly Andrade Molina; Gabriel Morey León; Juan Carlos Fernández Cadena; Kathryn Sacheri Viteri; Rubén Armas González                                                                                                                                                                                                                                                                                                                                                                                                                                        |
| EPI_ISL_1390600                                                                                                                                                                                                                                                                                                  | IZSM                                                                                | TIGEM                                                                                                                                      | Kenan Midilli; Mert Kuskucu; Yesim Tuyji Tok                                                                                                                                                                                                                                                                                                                                                                                                                                                                                                                              |
| EPI_ISL_1627304                                                                                                                                                                                                                                                                                                  | Idaho Bureau of Laboratories                                                        | Idaho Bureau of Laboratories                                                                                                               | Andrea Ballabio; Anna Manfredi; Antonio Grimaldi; Antonio Limone Luigi Atripaldi; Pellegrino Cerino; Biancamaria Pierri Claudia Tiberio Valentina Bouche; Chiara Colantuono; Davide Cacchiarelli; Denise Di Concilio; Francesco Panariello; Lucio Di Filippo; Marcello Salvi; Maria Concetta Cuomo; Patrizia Annunziata                                                                                                                                                                                                                                                   |
| EPI_ISL_2162138                                                                                                                                                                                                                                                                                                  | Ili Central District Hospital                                                       | Reference laboratory for the control of viral infections                                                                                   | Aimee Cisneros; Christopher Ball; Matthew Charles Burns; R. Beukelman; Robert L. Voermans                                                                                                                                                                                                                                                                                                                                                                                                                                                                                 |
| EPI_ISL_1825719                                                                                                                                                                                                                                                                                                  | Illinois Department of Public Health - Springfield Lab                              | Illinois Department of Public Health - Springfield Lab                                                                                     | Aidar Ussebayev; Aknur Mutaliyeva; Andrey Komissarov; Artem Fadeev; Azamat Kenessov; Bekzhan Maikotov; Gaukhar Nussupbayeva; Madina Tieubergenova; Maria Pisareva; Nazym Tieumbetova                                                                                                                                                                                                                                                                                                                                                                                      |
| EPI_ISL_2001062, EPI_ISL_2001063, EPI_ISL_2001065, EPI_ISL_2001068, EPI_ISL_2001070, EPI_ISL_2001071, EPI_ISL_2001077, EPI_ISL_2001078, EPI_ISL_2001080, EPI_ISL_2001098                                                                                                                                         | see above                                                                           | Immunology, Noguchi Memorial Institute for Medical Research                                                                                | Bryan Sim; Gordon McCall                                                                                                                                                                                                                                                                                                                                                                                                                                                                                                                                                  |
| EPI_ISL_1491362                                                                                                                                                                                                                                                                                                  | Imágenes Diagnósticas de Mazatlán                                                   | Microbial Genomics Laboratory                                                                                                              | A.W.; Adu, B.; Agbodji, B.; Appiah-Kubi, J.; Asare; Assane, H.; Awunyo, S.; Bonney; Campbell, A.; Dagnran, A.; Dorkenoo, A.; Egyir, B.; Gevao, S.; Halatoko; Harding, D.; Issa, Z.; J.K.; K.M.; Kossi, K.; Kumordjie, S.; Lamboni, L.; Layibo, Y.; Maman, I.; Mohktar, Q.; Odoom; Oteng, F.; Owusu-Nyantakyi, C.; Rogers, J.; Sadji; Salah, D.; Salou, M.; Wurie, I.; Y.A.; Yeboah, C.                                                                                                                                                                                    |
| EPI_ISL_1628665                                                                                                                                                                                                                                                                                                  | InDRE                                                                               | Instituto Nacional de Medicina Genomica                                                                                                    | Alejandra Garcia-Gasca; Bruno Gomez-Gil; Daniel Fregoso-Rueda; Julissa Enciso-Ibarra                                                                                                                                                                                                                                                                                                                                                                                                                                                                                      |
| EPI_ISL_1517404, EPI_ISL_1517431                                                                                                                                                                                                                                                                                 | Incienza, Instituto Costarricense de Investigación y Enseñanza en Nutrición y Salud | Incienza, Instituto Costarricense de Investigación y Enseñanza en Nutrición y Salud                                                        | Alcaraz N; Canseco Mendez JC; Cedro-Tanda A; Garcia-Cardenas FJ; Gisela Barrera-Badillo; Gonzalez-Barrera D; Gonzalez-Woge MA; Herrera-Montalvo LA.; Hidalgo-Miranda A; Irma Lopez-Martinez; Jose Ernesto Ramirez González; Mendoza-Vargas A; Miranda-Ortiz H; Munguia-Garza P; Ramirez-Vega O; Rangel-DeLeon D; Reyes-Grajeda JP; Rosas-Escobar P                                                                                                                                                                                                                        |
| EPI_ISL_413522                                                                                                                                                                                                                                                                                                   | Indian Council of Medical Research - National Institute of Virology                 | National Influenza Center, Indian Council of Medical Research - National Institute of Virology                                             | Barboza-Arguedas E & Blanco-Delgado C; Cristian Pérez-Corrales; Valeria Peralta-Barquero & Mauricio Bolaños                                                                                                                                                                                                                                                                                                                                                                                                                                                               |
| EPI_ISL_413523                                                                                                                                                                                                                                                                                                   | Indian Council of Medical Research-National Institute of Virology                   | National Influenza Center, Indian Council of Medical Research-National Institute of Virology                                               | Choudhary ML; Potdar V; Shete-Aich A; Yadav PD                                                                                                                                                                                                                                                                                                                                                                                                                                                                                                                            |
| EPI_ISL_2151336                                                                                                                                                                                                                                                                                                  | Infectious Diseases, King Faisal Hospital Research Center                           | Infectious Diseases, King Faisal Hospital Research Center                                                                                  | Choudhary ML; Potdar V; Shete-Aich A; Yadav PD                                                                                                                                                                                                                                                                                                                                                                                                                                                                                                                            |
| EPI_ISL_2088707                                                                                                                                                                                                                                                                                                  | Infinity Biologix                                                                   | Centers for Disease Control and Prevention Division of Viral Diseases, Pathogen Discovery                                                  | Al-Qahtani A, A.; Alhamlan F, S.; Almaghribi R, S.; Alsanea M; Althawadi S, I.; Balavenkatesh Mani, M.; Mutabagani M, S.; S. and Alahideb B, M.; UdayaRaja G, K.                                                                                                                                                                                                                                                                                                                                                                                                          |
| EPI_ISL_1909088, EPI_ISL_1909244, EPI_ISL_1909252, EPI_ISL_1912790, EPI_ISL_1913009, EPI_ISL_1913018, EPI_ISL_1913024, EPI_ISL_1913026, EPI_ISL_1913028, EPI_ISL_1913029, EPI_ISL_1913084                                                                                                                        |                                                                                     |                                                                                                                                            | Adrian Paskey; Benjamin Rambo-Martin; Chirayu Goswami; Christian Bixby; Christopher Gulvick; Clinton R. Paden; Dakota Howard; Darlene Wagner; Dhvani Batra; Duncan MacCannell; Jason Caravas; Jonathan Schultz; Kara Moser; Matthew Schmeer; Peter W. Cook; Robin Grimwood; Russ Hager; Scott Sammons; Shatavia Morrison; Yihe Wang; Yvette Unoarumi                                                                                                                                                                                                                      |

|                                                                                                                                                                                                                                                                                                                                                                                                                                                                              |                                                                                                                                |                                                                                                                                                    |                                                                                                                                                                                                                                                                                                                                                                                                                                                                                                                                                                                                                                                                                                                                             |
|------------------------------------------------------------------------------------------------------------------------------------------------------------------------------------------------------------------------------------------------------------------------------------------------------------------------------------------------------------------------------------------------------------------------------------------------------------------------------|--------------------------------------------------------------------------------------------------------------------------------|----------------------------------------------------------------------------------------------------------------------------------------------------|---------------------------------------------------------------------------------------------------------------------------------------------------------------------------------------------------------------------------------------------------------------------------------------------------------------------------------------------------------------------------------------------------------------------------------------------------------------------------------------------------------------------------------------------------------------------------------------------------------------------------------------------------------------------------------------------------------------------------------------------|
| see above                                                                                                                                                                                                                                                                                                                                                                                                                                                                    | Institut National d'Hygiène                                                                                                    | Laboratoire de Biotechnologie                                                                                                                      | Abdelmunim Essabbar; Fatima El Falaki; Hicham Ourmzli; Lahcen Belyamani and Azeddine Ibrahim; Mohamed Rhajaoui; Mouna Ouadghiri; Saaid Amzazi; Tarik Aanniz                                                                                                                                                                                                                                                                                                                                                                                                                                                                                                                                                                                 |
| EPI_ISL_1433132                                                                                                                                                                                                                                                                                                                                                                                                                                                              | Institut National d'Hygiène                                                                                                    | Unité Mixte Internationale TransVIHMI (UMI 233 IRD - U1175 INSERM - Université de Montpellier) IRD (Institut de recherche pour le développement)   | Abla A. KONOU; Adodo SADJI; Ahidjo AYOUBA; Akoélé SILIADIN; Alassane OURO-MEDEL; Amivi EHLAN; Améyo DORKENOO; Anoumou DAGNRA; Christelle BUTEL; Déléma MABA; Eric DELAPORTE; Issaka Maman; Kokou TEGUENI; Laetitia SERRANO; Martine PEETERS; Messanh DOUFFAN; Mireille PRINCE-DAVID; Mounerou SALOU; Sidonie A.M.KAGNISSODE; Sika DOSSIM; Wembo A. HALATOKO                                                                                                                                                                                                                                                                                                                                                                                 |
| EPI_ISL_2111158                                                                                                                                                                                                                                                                                                                                                                                                                                                              | Institut National d'Hygiène Consortium National de Veille Génomique - Maroc                                                    | Laboratoire de Biotechnologie                                                                                                                      | Abdelmunim Essabbar; Fatima El Falaki; Hicham Ourmzli; Lahcen Belyamani and Azeddine Ibrahim; Mohamed Rhajaoui; Mouna Ouadghiri; Saaid Amzazi; Tarik Aanniz                                                                                                                                                                                                                                                                                                                                                                                                                                                                                                                                                                                 |
| EPI_ISL_1442993                                                                                                                                                                                                                                                                                                                                                                                                                                                              | Institut National d'hygiène                                                                                                    | "Unité Mixte Internationale TransVIHMI (UMI 233 IRD - U1175 INSERM - Université de Montpellier) IRD (Institut de recherche pour le développement)" | Abla A. KONOU; Adodo SADJI; Ahidjo AYOUBA; Akoélé SILIADIN; Alassane OURO-MEDEL; Amivi EHLAN; Améyo DORKENOO; Anoumou DAGNRA; Christelle BUTEL; Déléma MABA; Eric DELAPORTE; Issaka Maman; Kokou TEGUENI; Koku AGBODEKA; Laetitia SERRANO; Martine PEETERS; Messanh DOUFFAN; Mireille PRINCE-DAVID; Mounerou SALOU; Sidonie A.M.KAGNISSODE; Sika DOSSIM; Wembo A. HALATOKO                                                                                                                                                                                                                                                                                                                                                                  |
| EPI_ISL_1508958                                                                                                                                                                                                                                                                                                                                                                                                                                                              | Institut National d'hygiène                                                                                                    | Unité Mixte Internationale TransVIHMI (UMI 233 IRD - U1175 INSERM - Université de Montpellier) IRD (Institut de recherche pour le développement)   | Abla A. KONOU; Adodo SADJI; Ahidjo AYOUBA; Akoélé SILIADIN; Alassane OURO-MEDEL; Amivi EHLAN; Améyo DORKENOO; Anoumou DAGNRA; Christelle BUTEL; Déléma MABA; Eric DELAPORTE; Issaka Maman; Kokou TEGUENI; Koku AGBODEKA; Laetitia SERRANO; Martine PEETERS; Messanh DOUFFAN; Mireille PRINCE-DAVID; Mounerou SALOU; Sidonie A.M.KAGNISSODE; Sika DOSSIM; Wembo A. HALATOKO                                                                                                                                                                                                                                                                                                                                                                  |
| EPI_ISL_1406144, EPI_ISL_1500948                                                                                                                                                                                                                                                                                                                                                                                                                                             | Institut National d'Hygiène (INH)                                                                                              | Unité Mixte Internationale TransVIHMI (UMI 233 IRD - U1175 INSERM - Université de Montpellier) IRD (Institut de recherche pour le développement)   | Abla A. KONOU; Adodo SADJI; Ahidjo AYOUBA; Akoélé SILIADIN; Alassane OURO-MEDEL; Amivi EHLAN; Améyo DORKENOO; Anoumou DAGNRA; Christelle BUTEL; Déléma MABA; Eric DELAPORTE; Issaka Maman; Kokou TEGUENI; Laetitia SERRANO; Martine PEETERS; Messanh DOUFFAN; Mireille PRINCE-DAVID; Mounerou SALOU; Sidonie A.M.KAGNISSODE; Sika DOSSIM; Wembo A. HALATOKO                                                                                                                                                                                                                                                                                                                                                                                 |
| EPI_ISL_1013419                                                                                                                                                                                                                                                                                                                                                                                                                                                              | Institut Pasteur de Guadeloupe                                                                                                 | National Reference Center for Viruses of Respiratory Infections, Institut Pasteur, Paris                                                           | Angela Brisebarre; Camille Capel; Etienne Simon-Lorière; Marion Barbet; Maud Vanpeene; Méline Bizard; Sylvie Behillil; Sylvie van der Werf; Talarmin Antoine; Vincent Enouf                                                                                                                                                                                                                                                                                                                                                                                                                                                                                                                                                                 |
| EPI_ISL_999032                                                                                                                                                                                                                                                                                                                                                                                                                                                               | Institut Pasteur de Guinée                                                                                                     | Institut Pasteur de Dakar                                                                                                                          | Dia Ndongo; Diagne Moussa Moïse; Diallo Amadou; Diop Mamadou; Faye Ousmane; Grayo Solene; Loucoubar Cheikh; Mbengue Safietou Sankhe; Ndiaye Ndack; Sall Amadou Alpha; Tordo Noel                                                                                                                                                                                                                                                                                                                                                                                                                                                                                                                                                            |
| EPI_ISL_1992100, EPI_ISL_1992241                                                                                                                                                                                                                                                                                                                                                                                                                                             | Institut Pasteur de Montevideo                                                                                                 | Institut Pasteur de Montevideo                                                                                                                     | Andres Lizoain; Camila Simoes; Cecilia Alonso; Daiana Mir; Fernando Lopez-Tort; Gonzalo Bello; Jose Sotelo Silveira; Leticia Maya; Lucia Bilbao; Lucia Spangenberg; Mailen Arleo; Mariana Brandes; Maria Jose Benitez-Galeano; Martin Graña; Matias Castells; Matias Victoria; Matias Salvo; Natalia Rego; Natalia Reyes; Pablo Smircich; Rodney Colina; Tamara Fernandez-Calero; Tania Possi; Veronica Noya; Yasser Vega                                                                                                                                                                                                                                                                                                                   |
| EPI_ISL_613423, EPI_ISL_613442                                                                                                                                                                                                                                                                                                                                                                                                                                               | Institut Pasteur de la Guadeloupe                                                                                              | Institut Pasteur de la Guadeloupe                                                                                                                  | Angela Brisebarre; Antoine Talarmin; Camille Capel; Etienne Simon-Lorière; Marion Barbet; Maud Vanpeene; Méline Bizard; Stéphanie Guymard; Sylvie Behillil; Sylvie van der Werf; Sébastien Breurec; Vincent Enouf                                                                                                                                                                                                                                                                                                                                                                                                                                                                                                                           |
| EPI_ISL_2110643                                                                                                                                                                                                                                                                                                                                                                                                                                                              | Institut Pasteur du Maroc                                                                                                      | Functional Genomics platform/CNRST                                                                                                                 | Alaoui Sanaa-amine; Chouati Taha; EL FAHIME Elmoustafa; Elannaz Hicham; Ennibi Khalid; Hemlali Mouhsine; MERABET MOUAD; Maaroufi Abderrahmane; Melloui Marouane; NOURLIL Jalal; Rfaki Abderrazak Touil Nadia; Youbi Mohammed                                                                                                                                                                                                                                                                                                                                                                                                                                                                                                                |
| EPI_ISL_417336                                                                                                                                                                                                                                                                                                                                                                                                                                                               | Institut des Agents Infectieux (IAI), Hospices Civils de Lyon                                                                  | CNR Virus des Infections Respiratoires - France SUD                                                                                                | Alexandre Gaymard; Antonin Bal; Bruno Lina; Carine Moustaud; Florence Morfin-Sherpa; Gregory Destras; Gwendolyne Burfin; Laurence Josset; Martine Valette; Maude Bouscambert-Duchamp; Raphaëlle Lamy; Solenne Brun                                                                                                                                                                                                                                                                                                                                                                                                                                                                                                                          |
| EPI_ISL_475917                                                                                                                                                                                                                                                                                                                                                                                                                                                               | Institut für Virologie am Department für Hygiene, Mikrobiologie und Public Health                                              | Bergthaler laboratory, CeMM Research Center for Molecular Medicine of the Austrian Academy of Sciences                                             | Alexander Lercher; Alexandra Popa; Andreas Bergthaler; Benedikt Agerer; Christoph Bock; Daniela Schmid; Dorothee von Laer; Elisabeth Puchhammer-Stoeckl; Franz Allerberger; Gregor Hörmann; Guenter Weiss; Henrique Colaco; Jakob-Wendelin Genger; Jan Laine; Judith Aberle; Kinga Rigler-Hohenwarter; Lukas Endler; Manfred Nairz; Mark Smyth; Martin Senekowitsch; Michael Schuster; Peter Hufnagl; Rainer Gattringer; Stephan Aberle; Thomas Penz; Wegene Borena                                                                                                                                                                                                                                                                         |
| EPI_ISL_955166                                                                                                                                                                                                                                                                                                                                                                                                                                                               | Institute for Biocides and Medical Ecology                                                                                     | Institute of microbiology and Immunology, Faculty of Medicine, University of Belgrade                                                              | Jankovic, M.; Jovanovic, T.; Knezevic, A.; Milicevic, O.; Sekler, M.; Tesovic, B.; Vidanovic, D.                                                                                                                                                                                                                                                                                                                                                                                                                                                                                                                                                                                                                                            |
| EPI_ISL_1498145, EPI_ISL_1669903                                                                                                                                                                                                                                                                                                                                                                                                                                             | Institute for Developing Science and Health Initiatives (ideSHI)                                                               | Institute for Developing Science and Health Initiatives (ideSHI)                                                                                   | Fidausi Qadri; Hassan Afrad; Sadia Rahman; Tahmina Shirin                                                                                                                                                                                                                                                                                                                                                                                                                                                                                                                                                                                                                                                                                   |
| EPI_ISL_459955, EPI_ISL_718302, EPI_ISL_718303, EPI_ISL_944099, EPI_ISL_1055361, EPI_ISL_1055363, EPI_ISL_1068929, EPI_ISL_1081327, EPI_ISL_1081352, EPI_ISL_1114721, EPI_ISL_1114724, EPI_ISL_1406146, EPI_ISL_1406242, EPI_ISL_1406244, EPI_ISL_1406247, EPI_ISL_1406286, EPI_ISL_1406292, EPI_ISL_1673338, EPI_ISL_1673344, EPI_ISL_1696750, EPI_ISL_1696757, EPI_ISL_1807207, EPI_ISL_2090886, EPI_ISL_2090887, EPI_ISL_2090889, EPI_ISL_2090890                         |                                                                                                                                |                                                                                                                                                    |                                                                                                                                                                                                                                                                                                                                                                                                                                                                                                                                                                                                                                                                                                                                             |
| see above                                                                                                                                                                                                                                                                                                                                                                                                                                                                    | Institute for Medical Research, Infectious Disease Research Centre, National Institutes of Health, Ministry of Health Malaysia | Institute for Medical Research, Infectious Disease Research Centre, National Institutes of Health, Ministry of Health Malaysia                     | Azizan MA; Ellan K; Kalyanasundram J; Kamel K; Kamel KA; Mohd Zawawi Z; Mohd-Zain R; Mohd-Zawawi Z; Ramly N; Robert F; Suppiah J; Thayan R                                                                                                                                                                                                                                                                                                                                                                                                                                                                                                                                                                                                  |
| EPI_ISL_1909202                                                                                                                                                                                                                                                                                                                                                                                                                                                              | Institute for Public Health of for Public Health "Dr. Andrija Stampar"                                                         | Croatian Institute of Public Health                                                                                                                | Irena Tabain; Ivana Ferenak                                                                                                                                                                                                                                                                                                                                                                                                                                                                                                                                                                                                                                                                                                                 |
| EPI_ISL_733553, EPI_ISL_1491542, EPI_ISL_1491570, EPI_ISL_1511127, EPI_ISL_1511133                                                                                                                                                                                                                                                                                                                                                                                           | Institute for Urban Disease Control and Prevention                                                                             | COVID-19 Network Investigations (CONI) Alliance                                                                                                    | Amornmas Kongkleng; Anek Mungaomklang; Angkana Huang; Anthony R. Jones; Arporn Wangwiwatsin; Bhakbhoom Panthan; Chonticha Klungtong; Duangkamon Loesbanluechai; Ekawat Pasomsub; Elizabeth Batty; Insee Sensorn; Janjira Thaipadungpanit; Kamolthip Atsawawaranunt; Khajohn Joonlasak; Khajohn Joonalak; Kingkan Rakmanee; Krittikorn Kumpornsin; Namfon Kotanan; Prayuth Kaewmmlang; Pukpakorn Parmwijitkul; Stefan Fernandez; Thanat Chookajorn; Theerarat Kochakarn; Theerwat Watthanachockchai; Vichan Pawun; Wasun Chantrattita; Wuditchai Manasatienkij                                                                                                                                                                               |
| EPI_ISL_1209344, EPI_ISL_1583422, EPI_ISL_2232929                                                                                                                                                                                                                                                                                                                                                                                                                            | Institute for Water Quality and Resource Management, Technical University Vienna                                               | Bergthaler laboratory, CeMM Research Center for Molecular Medicine of the Austrian Academy of Sciences                                             | Andreas Bergthaler; Anna Schedl; Bekir Erguner; Benedikt Agerer; Christoph Bock; Fabian Amman; Jan Laine; Lukas Endler; Maelle Le Moing; Martin Senekowitsch; Michael Schuster; Petr Trnska; Thomas Penz                                                                                                                                                                                                                                                                                                                                                                                                                                                                                                                                    |
| EPI_ISL_1140101                                                                                                                                                                                                                                                                                                                                                                                                                                                              | Institute for prevention, treatment and rehabilitation of cardiovascular diseases - Ohrid                                      | Research Center for Genetic Engineering and Biotechnology "Georgi D. Efremov", Macedonian Academy of Sciences and Arts                             | Aleksandar J. Dimovski; Dijana Plasheska-Karanfilska; Gjorgji Bozinovski; Milena Jakimovska; Predrag Noveski                                                                                                                                                                                                                                                                                                                                                                                                                                                                                                                                                                                                                                |
| EPI_ISL_1055782, EPI_ISL_1057098, EPI_ISL_1057102                                                                                                                                                                                                                                                                                                                                                                                                                            | Institute of Biocides and Medical Ecology, Belgarde, Serbia                                                                    | Virology Department Institute of Microbiology and Immunology Faculty of Medicine University of Belgrade                                            | Abazovic Dzihan; Banko Ana; Despot Dragana; Loncar Ana; Milicevic Ognjen; Miljanovic Danijela                                                                                                                                                                                                                                                                                                                                                                                                                                                                                                                                                                                                                                               |
| EPI_ISL_600562                                                                                                                                                                                                                                                                                                                                                                                                                                                               | Institute of Epidemiology Disease Control And Research                                                                         | Institute for Developing Science and Health Initiatives                                                                                            | Firadausi Qadri; Lauren Cowley; Md. Mahfuz-Al-mamun; Mokibul Hassan Afrad; Sadia Isfat Ara Rahman; Tahmina Shirin                                                                                                                                                                                                                                                                                                                                                                                                                                                                                                                                                                                                                           |
| EPI_ISL_2180454                                                                                                                                                                                                                                                                                                                                                                                                                                                              | Institute of Epidemiology, Disease Control and Research (IEDCR)                                                                | IEDCR-ideSHI-icddr,b                                                                                                                               | Firadausi Qadri; Hassan Afrad; Manjur Hossain Khan; Sadia Rahman; Tahmina Shirin                                                                                                                                                                                                                                                                                                                                                                                                                                                                                                                                                                                                                                                            |
| EPI_ISL_422563                                                                                                                                                                                                                                                                                                                                                                                                                                                               | Institute of Microbiology Universidad San Francisco de Quito                                                                   | Institute of Microbiology Universidad San Francisco de Quito                                                                                       | Alejandra Ramones; Belen Prado-Vivar; Bernardo Gutierrez; Edison Ligña; Francisco Mora; Franklin Espinoza; Gabriel Trueba; Jorge Reyes; Juan Gaviña; Juan Jose Guadalupe; Michelle Grunauer; Patricio Rojas-Silva; Paul Cardenas; Sully Marquez; Veronica Barragan                                                                                                                                                                                                                                                                                                                                                                                                                                                                          |
| EPI_ISL_635221, EPI_ISL_635279, EPI_ISL_1265264, EPI_ISL_1403381, EPI_ISL_1498922, EPI_ISL_1498935, EPI_ISL_1669543, EPI_ISL_1964386                                                                                                                                                                                                                                                                                                                                         |                                                                                                                                |                                                                                                                                                    |                                                                                                                                                                                                                                                                                                                                                                                                                                                                                                                                                                                                                                                                                                                                             |
| see above                                                                                                                                                                                                                                                                                                                                                                                                                                                                    | Institute of Microbiology and Immunology, Faculty of Medicine, University of Ljubljana                                         | Institute of Microbiology and Immunology, Faculty of Medicine, University of Ljubljana                                                             | Alen Sulji; Andraž Celar; Andrej Celar; Dominika Šturm; Doroteja Vljaj; Mario Poljak; Matic Brvar; Miša Korva; Patricija Pozvek; Samo Zakotnik; Tatjana Avši - Županc; Tatjana Avši - Županc; Tomaž Mark Zorec; Špela Pleh                                                                                                                                                                                                                                                                                                                                                                                                                                                                                                                  |
| EPI_ISL_548943, EPI_ISL_548946                                                                                                                                                                                                                                                                                                                                                                                                                                               | Institute of Microbiology, University of Veterinary and Animal sciences                                                        | Institute of Microbiology, University of Veterinary and Animal sciences                                                                            | Ali; Altaf, I.; Anwar, M.; Ashraf; Asif, A.; Attique; Awan; Aziz; Bhatti; Cheema; Fazal, S.; Hassan, S.; Khan; Khan, N.; M.A.; M.B.; M.M.; M.S.; M.T.; M.U.; M.W.; M.Z.; Mehmood, A.; Mukhtar, N.; N.A.; Nawaz, M.; Rafique, S.; Rana; Raza, S.; S.Q.; S.Z.; Sardar, N.; Sarwar, H.; Shabbir; Shah; Tahir, Z.; Yaqub, T.; Younis                                                                                                                                                                                                                                                                                                                                                                                                            |
| EPI_ISL_486842, EPI_ISL_486849, EPI_ISL_525430, EPI_ISL_527809, EPI_ISL_660529, EPI_ISL_660530, EPI_ISL_697783, EPI_ISL_697790, EPI_ISL_697792, EPI_ISL_697798, EPI_ISL_697800, EPI_ISL_824287, EPI_ISL_877561, EPI_ISL_877562, EPI_ISL_1805653, EPI_ISL_1805707, EPI_ISL_1805711, EPI_ISL_1896684, EPI_ISL_2086712, EPI_ISL_2086716, EPI_ISL_2100425, EPI_ISL_2100432, EPI_ISL_2100437, EPI_ISL_2134873, EPI_ISL_2228102, EPI_ISL_2228104, EPI_ISL_2228111, EPI_ISL_2228112 |                                                                                                                                |                                                                                                                                                    |                                                                                                                                                                                                                                                                                                                                                                                                                                                                                                                                                                                                                                                                                                                                             |
| see above                                                                                                                                                                                                                                                                                                                                                                                                                                                                    | Institute of Microbiology, Universidad San Francisco de Quito                                                                  | Institute of Microbiology, Universidad San Francisco de Quito                                                                                      | Adriana Arnao; Alexandra Noboa; Alvaro Davalos de Castro; Ana Diaz; Andrea Cungan; Andres Moreno; Anita Garcia; Belén Prado-Vivar; Bernardo Gutiérrez; Carla Torres; Carlos Tobar; Christian Zambrano; Cristian Pelaez; David Acosta-España; Diana Zambrano; Diego Mora; Diego Morocho; Edgar Espinoza; Edison Chavez; Eduardo Males; Ernesto Pazos; Fabricio Picoita; Fausto Maldonado; Fernanda Zurita; Fernanda Garcia; Fernando Martinez; Freddy Saldarriaga Mera; Fredy Looz; Gabriel Trueba; Geovanny Carzola; Guzmán Bernabéu Lorenzo; Hector Moya; Jonathan Araujo; Jorge Caamaño; Jorge Huertas; Jorge Washington Huertas Garzón; Juan Carlos Zuriga; Juan José Guadalupe; Juan Monge; Juan Zuñiga; Karina Barragan; Luis Morales; |



|                                                                                                                                                                                                                                                                                                                                                                     |                                                                                                                                                                                                                                           |                                                                                                                                                                                                                                                               |                                                                                                                                                                                                                                                                                                                                                                                                                                                                                                                                                                                                                                                                                                                     |
|---------------------------------------------------------------------------------------------------------------------------------------------------------------------------------------------------------------------------------------------------------------------------------------------------------------------------------------------------------------------|-------------------------------------------------------------------------------------------------------------------------------------------------------------------------------------------------------------------------------------------|---------------------------------------------------------------------------------------------------------------------------------------------------------------------------------------------------------------------------------------------------------------|---------------------------------------------------------------------------------------------------------------------------------------------------------------------------------------------------------------------------------------------------------------------------------------------------------------------------------------------------------------------------------------------------------------------------------------------------------------------------------------------------------------------------------------------------------------------------------------------------------------------------------------------------------------------------------------------------------------------|
| EPI_ISL_1465446, EPI_ISL_1745684, EPI_ISL_1745709, EPI_ISL_1909804, EPI_ISL_2189545<br>EPI_ISL_508376                                                                                                                                                                                                                                                               | Institute of Molecular and Translational Medicine / Laboratory of Experimental Medicine, Faculty of Medicine and Dentistry, Palacky University and University Hospital Olomouc<br>Institute of Post Graduate Medical Education & Research | Institute of Molecular and Translational Medicine / Laboratory of Experimental Medicine, Faculty of Medicine and Dentistry, Palacky University<br>National Institute of Biomedical Genomics                                                                   | Manuel Jaramillo; Manuel Jibaja; Marco Jimenez; Maria Nataly Velastegui Peralta; Maribel Cruz; Maureen Mosquera; Mayra Perero Intriago; Michelle Grunauer; Miguel Sacoto Mazini; Milton Tobar; Monica Becerra-Wong; Monica Becerra-Wong Juan José Guadalupe; Nabih Dahik; Nelson Remache; Pablo Flores; Patricio Rojas-Silva; Paul Cárdenas; Piedad Villacis; Rene Bracho; Ronny de la Torre; Rosa Avila; Sayra Caiza; Stephanie Arregui; Sully Márquez; Tanya Guayasamin; Tanya Guayasamin; Vanesa Ramirez; Veronica Paredes; Verónica Barragán; Viviana Medina<br>Barbora Blumová; Hana Jaworek; Marián Hajdúch; Rastislav Slavkovský; Tomáš Pospíšil; Tomáš Pospíšil; Vladimíra Koudeláková                      |
| EPI_ISL_577741, EPI_ISL_875538, EPI_ISL_959609, EPI_ISL_959645, EPI_ISL_959646, EPI_ISL_959649, EPI_ISL_1239394, EPI_ISL_1492528, EPI_ISL_1626727, EPI_ISL_1994562, EPI_ISL_2151015, EPI_ISL_2151030                                                                                                                                                                | Institute of Virology, Biomedical Research Center of the Slovak Academy of Sciences, Bratislava                                                                                                                                           | Faculty of Natural Sciences, Comenius University, Bratislava                                                                                                                                                                                                  | Arindam Maitra; Aritra Biswas; Jayeeta Haldar; Monimoy Banerjee; Raja Ray; Saumitra Das                                                                                                                                                                                                                                                                                                                                                                                                                                                                                                                                                                                                                             |
| see above                                                                                                                                                                                                                                                                                                                                                           | Institute of Virology, Biomedical Research Center of the Slovak Academy of Sciences, Bratislava                                                                                                                                           | Faculty of Natural Sciences, Comenius University, Bratislava                                                                                                                                                                                                  | Boris Klempa; Brona Brejova; Broa Brejová; Dominika Friová; Edita Staroová; Elena Tichá; Jozef Nosek; Juraj Kopacek; Juraj Kopáek; Kristina Borsova; Kristina Bořová; Lubomira Lukacikova; Martina Likova; Martina Liková; Martina Neboháová; Martina Neboháová; Monika Slavikova; Monika Sláviková; Sabina Fumacova Havlikova; Sabina Fumová Havliková; Tomas Vinar; Tomáš Vina; Viktoria Cabanova; Viktoria Hodorova; Viktória Hodorová; Viktória abanová; ubomira Lukáiková                                                                                                                                                                                                                                      |
| EPI_ISL_1654811, EPI_ISL_1654812, EPI_ISL_1654814, EPI_ISL_1654824, EPI_ISL_1654826, EPI_ISL_1654831, EPI_ISL_1654833                                                                                                                                                                                                                                               | Institute of Virology, Vaccines and Sera "Torlak"                                                                                                                                                                                         | Institute of microbiology and Immunology, Faculty of Medicine, University of Belgrade                                                                                                                                                                         | Jankovic, M.; Jovanovic, T.; Knezevic, A.; Milicevic, O.; Sekler, M.; Tesovic, B.; Vidanovic, D.                                                                                                                                                                                                                                                                                                                                                                                                                                                                                                                                                                                                                    |
| EPI_ISL_1017693                                                                                                                                                                                                                                                                                                                                                     | Institute of Virology, Vaccines and Sera "Torlak"                                                                                                                                                                                         | Institute of microbiology and Immunology, Faculty of Medicine, University of Belgrade                                                                                                                                                                         | Jankovic, M.; Jovanovic, T.; Knezevic, A.; Milicevic, O.; Sekler, M.; Tesovic, B.; Vidanovic, D.                                                                                                                                                                                                                                                                                                                                                                                                                                                                                                                                                                                                                    |
| EPI_ISL_985177, EPI_ISL_1731607                                                                                                                                                                                                                                                                                                                                     | Instituto Adolfo Lutz Central                                                                                                                                                                                                             | Instituto Adolfo Lutz, Interdisciplinary Procedures Center, Strategic Laboratory                                                                                                                                                                              | Caio Vinicius Dias Lopes; Claudia Regina Gonçalves; Claudio Tavares Sacchi; Erica Valessa Ramos Gomes; Karoline Rodrigues Campos; Katia Correa de Oliveira Santos; Leonardo Jose Tadeu de Araujo                                                                                                                                                                                                                                                                                                                                                                                                                                                                                                                    |
| EPI_ISL_2241326                                                                                                                                                                                                                                                                                                                                                     | Instituto Butantan                                                                                                                                                                                                                        | Instituto Butantan                                                                                                                                                                                                                                            | Antonio Jorge Martins; Claudia Renata dos Santos Barros; David Schlesinger; Debora Botequiao Moretti; Dimas Tadeu Covas; Elaine Cristina Marqueze; Elaine Vieira Santos; Evandra Strazza Rodrigues; Heidge Fukumasu; Jayme Augusto de Souza-Neto; José Salvatore Leister Patané; Luiz Alcantara; Luiz Lehmann Coutinho; Maria Carolina Elias; Mauricio Lacerda Nogueira; Rafael dos Santos Bezerra; Raul Machado Neto; Rejane Maria Tommasini Grotto; Ricardo Haddad; Sandra Coccuzzo Sampaio Vessoni; Simone Kashima; Svetoslav Nanev Slavov; Vincent Louis Viala                                                                                                                                                  |
| EPI_ISL_1347907, EPI_ISL_1347908, EPI_ISL_1347917, EPI_ISL_1347929, EPI_ISL_1347936, EPI_ISL_1347937, EPI_ISL_1545277, EPI_ISL_1545278, EPI_ISL_1545284, EPI_ISL_1545301, EPI_ISL_1545303, EPI_ISL_1545304, EPI_ISL_1545306, EPI_ISL_1545307, EPI_ISL_1545308, EPI_ISL_1545309, EPI_ISL_1545313, EPI_ISL_1545314, EPI_ISL_1545376, EPI_ISL_1545377, EPI_ISL_1545389 | Instituto Nacional de Investigación em Saúde                                                                                                                                                                                              | KRISP, KZN Research Innovation and Sequencing Platform                                                                                                                                                                                                        | Afonso P; David K; Emmanuel SJ; Freitas RH; Giandhari J; Inglês L; Lutucua S; Miranda J; Morais J; Mufinda M; Naidoo Y; Neto Z; Paulo A Carralero RR Paixão JP; Pereira A; Pillay S; Tegally H; Wilkinson E; de Oliveira T                                                                                                                                                                                                                                                                                                                                                                                                                                                                                          |
| EPI_ISL_1005559, EPI_ISL_1095510, EPI_ISL_1120885                                                                                                                                                                                                                                                                                                                   | Instituto Nacional de Medicina Genomica                                                                                                                                                                                                   | Instituto Nacional de Medicina Genomica                                                                                                                                                                                                                       | Alcaraz N; Cedro-Tanda A; Cisneros-Villanueva M; Gonzalez-Barrera D; Herrera-Montalvo LA; Hidalgo-Miranda A; Mendoza-Vargas A; Peñaloza-Figueroa F; Ramirez-Vega O; Rangel-DeLeon D; Reyes-Grajeda JP; Sifuentes-Rojas C                                                                                                                                                                                                                                                                                                                                                                                                                                                                                            |
| EPI_ISL_536546, EPI_ISL_536564                                                                                                                                                                                                                                                                                                                                      | Instituto Nacional de Salud                                                                                                                                                                                                               | Laboratorio de Infecciones Respiratorias Agudas                                                                                                                                                                                                               | David Tarazona; Dennis Carhuarica; Eduardo Juscamayta Lopez; Faviola Valdivia Guerrero; Lenin Maturrano Hernandez; Nancy Rojas Serrano; Ronnie Gavilan Chavez                                                                                                                                                                                                                                                                                                                                                                                                                                                                                                                                                       |
| EPI_ISL_941985                                                                                                                                                                                                                                                                                                                                                      | Instituto Nacional de Salud, Bogotá, Colombia                                                                                                                                                                                             | Centro de Investigaciones en Microbiología y Biotecnología-UR (CIMBIUR), Facultad de Ciencias Naturales, Universidad del Rosario, Bogotá, Colombia Instituto Nacional de Salud, Bogotá, Colombia Icahn School of Medicine at Mount Sinai, New York, USA       | Adriana van de Guchte; Alberto Paniz-Mondolfi; Ana S. Gonzalez-Reiche; Carolina Flórez; Carolina Hernández; Emilia Mia Sordillo; Hala Alejei Alshammary; Harm van Bakel; Jayeeta Dutta; Juan David Ramírez; Luz Helena Patiño; Marina Muñoz; Matthew M. Hernandez; Nathalia Ballesteros; Sergio Gomez; Viviana Simon; Zenab Khan                                                                                                                                                                                                                                                                                                                                                                                    |
| EPI_ISL_447789                                                                                                                                                                                                                                                                                                                                                      | Instituto Nacional de Salud, Bogotá, Colombia                                                                                                                                                                                             | Grupo de Investigaciones Microbiológicas-UR (GIMUR), Departamento de Biología, Facultad de Ciencias Naturales, Universidad del Rosario, Bogotá, Colombia Instituto Nacional de Salud, Bogotá, Colombia Icahn School of Medicine at Mount Sinai, New York, USA | Adriana Castillo; Alberto Paniz-Mondolfi; Ana S. Gonzalez-Reiche; Angelica Rico; Anibal A. Teherán; Carolina Florez; Carolina Hernandez; David Martínez; Emilia Mia Sordillo; Esther C. Barros; Harm van Bakel; Jesús E. Jaimes; Juan David Ramirez; Laura Vega; Lisseth Pardo; Marina Muñoz; Martha L. Ospina; Matthew M. Hernandez; Nathalia Ballesteros; Sergio Castañeda; Sergio Gomez; Viviana Simon                                                                                                                                                                                                                                                                                                           |
| EPI_ISL_498157, EPI_ISL_653758, EPI_ISL_653762, EPI_ISL_739675                                                                                                                                                                                                                                                                                                      | Instituto Nacional de Salud, Bogotá, Colombia                                                                                                                                                                                             | Instituto Nacional de Salud, Bogotá, Colombia                                                                                                                                                                                                                 | Astrid C. Flórez; Carlos Andrés Durán; Carlos Franco-Muñoz; Carolina Ferro; Christian Julian VillabonaArenas; Diana Marcela Walteros-Acero; Diego A. Álvarez-Díaz; Diego Andrés Prada; Franklin Prieto; Jonathan Reales; Jose A. Usme-Ciro; Katherine Laiton-Donato; Liz Villabona-Arenas; Magdalena Weisner; Marcela Mercado-Reyes; Martha Lucia Ospina Martinez; Mauricio Pacheco-Montealegre; Nicolas D. Franco-Sierra; Sheryl Corchuelo; Sussy Echeverria; Zulma M. Cucunubá                                                                                                                                                                                                                                    |
| EPI_ISL_1424059                                                                                                                                                                                                                                                                                                                                                     | Instituto Nacional de Salud- Dirección de Investigación en Salud Pública                                                                                                                                                                  | Instituto Nacional de Salud- Dirección de Investigación en Salud Pública                                                                                                                                                                                      | Carlos Franco-Muñoz; Diego A. Álvarez-Díaz; Diego Andrés Prada; Gerardo Santamaría; Jhonnatan Reales-González; Julian Naizaque; Katherine Laiton-Donato; Magdalena Wiesner; Marcela Mercado-Reyes.; Martha T. Herrera-Sepúlveda; Martha Lucia Ospina Martínez; Mauricio Pacheco; Sheryl Corchuelo                                                                                                                                                                                                                                                                                                                                                                                                                   |
| EPI_ISL_956288, EPI_ISL_956292, EPI_ISL_956293, EPI_ISL_1303367, EPI_ISL_1303377                                                                                                                                                                                                                                                                                    | Instituto Nacional de Salud- Dirección de Redes de Laboratorios de Salud Pública                                                                                                                                                          | Instituto Nacional de Salud- Dirección de Investigación en Salud Pública                                                                                                                                                                                      | Carlos Franco-Muñoz; Carmen Osorio; Diana Malo; Diego A. Álvarez-Díaz; Diego Andrés Prada; Gerardo Santamaría; Hector Alejandro Ruiz-Moreno; Jhonnatan Reales-González; Juan Camilo Martínez; Julian Naizaque; Katherine Laiton-Donato; Lisseth Pardo; Magdalena Wiesner; Marcela Mercado-Reyes; Marta T. Herrera-Sepúlveda; Marta Lopez Blanco; Martha Lucia Ospina Martinez; Mauricio Pacheco-Montealegre; Sergio Gomez; Sheryl Corchuelo; Ángela Alarcon Cruz                                                                                                                                                                                                                                                    |
| EPI_ISL_887420, EPI_ISL_887429, EPI_ISL_887434, EPI_ISL_887436, EPI_ISL_887437, EPI_ISL_887503, EPI_ISL_964948, EPI_ISL_1132824, EPI_ISL_1132825, EPI_ISL_1132828, EPI_ISL_1132832, EPI_ISL_1132837, EPI_ISL_1132843                                                                                                                                                | Instituto Nacional de Saude (INS), Mozambique                                                                                                                                                                                             | KRISP, KZN Research Innovation and Sequencing Platform                                                                                                                                                                                                        | Emmanuel S; Giandhari J; Nadia Siteo; Nalia Ismael; Nedio Mabunda; Paulo Arnaldo; Pillay S; Tegally H; Wilkinson E; de Oliveira T                                                                                                                                                                                                                                                                                                                                                                                                                                                                                                                                                                                   |
| EPI_ISL_693569, EPI_ISL_738109, EPI_ISL_941587, EPI_ISL_1116621, EPI_ISL_1171975, EPI_ISL_1172000, EPI_ISL_1172003                                                                                                                                                                                                                                                  | Instituto Nacional de Saude (INSA)                                                                                                                                                                                                        | Instituto Nacional de Saude (INSA)                                                                                                                                                                                                                            | Borges et al                                                                                                                                                                                                                                                                                                                                                                                                                                                                                                                                                                                                                                                                                                        |
| EPI_ISL_1854110                                                                                                                                                                                                                                                                                                                                                     | Instituto Nacional de Saude (INSA) and BioSystems & Integrative Sciences Institute (BioISI) Genomics Unit, FCUL                                                                                                                           | Instituto Nacional de Saude (INSA) and BioSystems & Integrative Sciences Institute (BioISI) Genomics Unit, FCUL                                                                                                                                               | Borges et al                                                                                                                                                                                                                                                                                                                                                                                                                                                                                                                                                                                                                                                                                                        |
| EPI_ISL_1117066                                                                                                                                                                                                                                                                                                                                                     | Instituto Nacional de Saude (INSA) and Institute of Biomedicine (iBiMed), Universidade de Aveiro                                                                                                                                          | Instituto Nacional de Saude (INSA) and Institute of Biomedicine (iBiMed), Universidade de Aveiro                                                                                                                                                              | Borges et al                                                                                                                                                                                                                                                                                                                                                                                                                                                                                                                                                                                                                                                                                                        |
| EPI_ISL_732128, EPI_ISL_732179, EPI_ISL_1116828, EPI_ISL_1116837, EPI_ISL_1117349, EPI_ISL_1399834<br>EPI_ISL_1734871                                                                                                                                                                                                                                               | Instituto Nacional de Saude (INSA) and Instituto Gulbenkian de Ciencia (IGC)                                                                                                                                                              | Instituto Nacional de Saude (INSA) and Instituto Gulbenkian de Ciencia (IGC)                                                                                                                                                                                  | Borges et al                                                                                                                                                                                                                                                                                                                                                                                                                                                                                                                                                                                                                                                                                                        |
| EPI_ISL_455434, EPI_ISL_455437, EPI_ISL_493338, EPI_ISL_516616, EPI_ISL_576261, EPI_ISL_576268, EPI_ISL_872097                                                                                                                                                                                                                                                      | Instituto de Biotecnologia - UNESP-Botucatu-SP                                                                                                                                                                                            | Instituto de Biotecnologia - UNESP-Botucatu-SP                                                                                                                                                                                                                | Cecilia Artico Banho; Cintia Bittar; Fábio Sossai Possebon; Guilherme Campos; Helena Lage Ferreira; Jorge A. Petrolí Marchesi; João Pessoa Araújo Jr.; Leila Sabrina Ullmann; Livia Sacchetto; Maisa C. Pereira Parra; Marília Moraes; Mauricio L. Nogueira; Paula Rahal; Paulo Inacio da Costa                                                                                                                                                                                                                                                                                                                                                                                                                     |
| see above                                                                                                                                                                                                                                                                                                                                                           | Instituto de Diagnostico y Referencia Epidemiologicos (INDRE)                                                                                                                                                                             | Instituto de Diagnostico y Referencia Epidemiologicos (INDRE)                                                                                                                                                                                                 | Abril Rodríguez-Maldonado; Adhan Araiza-Rodríguez; Adhan-Araiza Rodríguez; Araiza-Rodríguez Adnan; Barrera-Badillo Gisela; Claudia Wong-Arambula; Dayanira Arellano-Suarez; Edgar Mendieta-Condado; Ernesto Ramirez-Gonzalez; Ernesto Ramirez-Gonzalez.; Fabiola Garces-Ayala; Garces-Ayala Fabiola; Garces-Ayala Fabiola. Ramirez-Gonzalez Ernesto; Gisela Barrera-Badillo; Gisela Barrera-Badillo.; Hernandez-Rivas Lucia; Irma Lopez-Martinez; Lopez-Martinez Irma; Lopez-Martinez Irma.; Lucia Hernandez-Rivas; Mendieta-Condado Edgar; Natividad Cruz-Ortiz; Rodriguez-Maldonado Abril; Taboada Ramirez Blanca.; Taboada Ramirez Blanca. Ramirez-Gonzalez Ernesto; Tatiana Nunez-Garcia; Wong-Arambula Claudia |
| EPI_ISL_913926, EPI_ISL_913960, EPI_ISL_913981, EPI_ISL_933678, EPI_ISL_1054958, EPI_ISL_1054973, EPI_ISL_1054994, EPI_ISL_1168454, EPI_ISL_1168459, EPI_ISL_1168482, EPI_ISL_1168491, EPI_ISL_1168495, EPI_ISL_1168522, EPI_ISL_1168523, EPI_ISL_1168524, EPI_ISL_1168526, EPI_ISL_1168527,                                                                        |                                                                                                                                                                                                                                           |                                                                                                                                                                                                                                                               |                                                                                                                                                                                                                                                                                                                                                                                                                                                                                                                                                                                                                                                                                                                     |

|                                                                                                                                                                                                                                                                                                                                                                                                                                                        |           |                                                                                                                                                                                                                           |                                                                                                                                                                                                 |                                                                                                                                                                                                                                                                                                                                                                                                                                                                                                                                                                                                                                                                                                                                                                                                                                                                     |
|--------------------------------------------------------------------------------------------------------------------------------------------------------------------------------------------------------------------------------------------------------------------------------------------------------------------------------------------------------------------------------------------------------------------------------------------------------|-----------|---------------------------------------------------------------------------------------------------------------------------------------------------------------------------------------------------------------------------|-------------------------------------------------------------------------------------------------------------------------------------------------------------------------------------------------|---------------------------------------------------------------------------------------------------------------------------------------------------------------------------------------------------------------------------------------------------------------------------------------------------------------------------------------------------------------------------------------------------------------------------------------------------------------------------------------------------------------------------------------------------------------------------------------------------------------------------------------------------------------------------------------------------------------------------------------------------------------------------------------------------------------------------------------------------------------------|
| EPI_ISL_1168528, EPI_ISL_1168588, EPI_ISL_1168589, EPI_ISL_1168593, EPI_ISL_1168598, EPI_ISL_1168605, EPI_ISL_1168606                                                                                                                                                                                                                                                                                                                                  | see above | Instituto de Diagnostico y Referencia Epidemiologicos<br>INDRE_RNLSP                                                                                                                                                      | Instituto de Diagnostico y Referencia Epidemiologicos<br>(INDRE)                                                                                                                                | Abril Rodriguez-Maldonado; Adnan Araiza-Rodriguez; Ariadna Medina-Benitez; Claudia Wong-Arambula; David Fragoso-Fonseca; Ernesto Ramirez-Gonzalez.; Fabiola Garces-Ayala; Gisela Barrera-Badillo; Irma Lopez-Martinez; Joaquin Quiroz-Mercado; Lucia Hernandez-Rivas; Mayra Jimenez-Morales; Nancy Munoz-Hernandez; Natividad Cruz-Ortiz; Sergio Rangel-Guerrero; Tatiana Nunez-Garcia; Vanessa Rivero-Arredondo                                                                                                                                                                                                                                                                                                                                                                                                                                                    |
| EPI_ISL_1301482, EPI_ISL_1301514, EPI_ISL_1301526, EPI_ISL_1301540, EPI_ISL_1301555, EPI_ISL_1301564, EPI_ISL_1301699, EPI_ISL_1302197, EPI_ISL_1302276, EPI_ISL_1302371                                                                                                                                                                                                                                                                               | see above | Instituto de Diagnostico y Referencia Epidemiologicos<br>InDRE_RNLSP                                                                                                                                                      | Instituto de Biotecnologia de la UNAM                                                                                                                                                           | Alejandra Hernández-Terán; Alejandro Sanchez-Flores; Alma Rincón-Rubio; Andrea Santos Coy-Arechavaleta; Authors from IBT; Blanca Taboada; Celia Boukadida; Clara Esperanza Santacruz-Tinoco; Edgar Mendieta-Condado; Eduardo Becerril-Vargas; Fidencio Mejía-Nepomuceno; Francisco Pulido; Gisela Barrera-Badillo; Gloria Vazquez; Hector Esteban Paz-Juárez; IMSS; INDRE and INER (in alphabetical order); Carlos F. Arias; Irma Lopez-Martinez; Jerome Jean Verleyen; Joel Armando Vázquez-Pérez; Jorge Salas-Hernández; José Arturo Martínez-Orozco; José Ernesto Ramírez-González; José Esteban Muñoz-Medina; Larissa Fernandes-Matano; Lucia Hernandez-Rivas; Luis Alberto Ochoa-Carrera; Margarita Matías-Florentino; Mario Mújica-Sánchez; Natividad Cruz-Ortiz; Pavel Isa; Ricardo Grande; Santiago Ávila-Ríos; Tatiana Nunez-Garcia; Teresta Rojas-Mendoza |
| EPI_ISL_747615                                                                                                                                                                                                                                                                                                                                                                                                                                         |           | Instituto de Investigaciones Biologicas Clemente Estable                                                                                                                                                                  | Institut Pasteur de Montevideo                                                                                                                                                                  | Ana Carolina Mendonça; Andres Lizasoain; Camila Simoes; Cecilia Alonso; Cecilia Salazar; Daiana Mir; Fernando Lopez-Tort; Fernando Motta; Gonzalo Bello; Ighor Arantes; Ignacio Ferrés; Jose Sotelo; Leticia Garay Martins; Luciana Appolinario; Lucia Spangenberg; Mailen Arleo; Mariana Brandes; Marilda Mendonça Siqueira; Marilda Tereza Mar da Rosa; Maria Jose Benitez-Galeano; Martin Graña; Matias Castells; Matias Victoria; Matias Salvo; Natalia Rego; Natalia Reyes; Pablo Smircich; Paola Cristina Resende; Rodney Colina; Tamara Fernandez-Calero; Tania Possi; Tatiana Schäffer Gregianini; Veronica Noya; Yasser Vega                                                                                                                                                                                                                               |
| EPI_ISL_510461                                                                                                                                                                                                                                                                                                                                                                                                                                         |           | Instituto de Investigaciones Biomédicas de Barcelona (CSIC), Hospital Clinic i Provincial de Barcelona, Instituto de Biomedicina de Valencia (CSIC), Hospital de Sant Pau                                                 | SeqCOVID-SPAIN consortium/IBV(CSIC)                                                                                                                                                             | Alex Soriano; Andrea Vergara; Anna M. Planas; Israel Fernández Castaños and SeqCOVID-SPAIN consortium; Jordi Pérez Tur; Miguel J. Martínez; M <sup>a</sup> Angeles Marcos                                                                                                                                                                                                                                                                                                                                                                                                                                                                                                                                                                                                                                                                                           |
| EPI_ISL_1395784, EPI_ISL_1395785, EPI_ISL_1395803                                                                                                                                                                                                                                                                                                                                                                                                      |           | Instituto de Investigaciones Biomédicas en Retrovirus y SIDA (INBIRS)                                                                                                                                                     | Área de Secuenciación del Laboratorio de Virología del Hospital de Niños Dr. Ricardo Gutierrez on behalf of 'Proyecto Argentino Interinstitucional de genómica de SARS-CoV-2' (PAIS Consortium) | Acuña; Alexay; D; Federico Remes Lenicov; Goya; Horacio Salomón; LE; Lusso; M; MI; Nabaes Jodar; Natale; S; Valinotto; Vanesa Seery; Viegas, M.                                                                                                                                                                                                                                                                                                                                                                                                                                                                                                                                                                                                                                                                                                                     |
| EPI_ISL_1629795, EPI_ISL_1629799, EPI_ISL_1629801, EPI_ISL_1629802, EPI_ISL_1629803, EPI_ISL_1629804, EPI_ISL_1629805, EPI_ISL_1629806, EPI_ISL_1629807                                                                                                                                                                                                                                                                                                | see above | Instituto de Medicina Tropical Alexander Von Humboldt, Universidad Peruana Cayetano Heredia                                                                                                                               | Laboratorio de Genómica Microbiana, Universidad Peruana Cayetano Heredia                                                                                                                        | Alejandra Dávila-Barclay; Diego Cuicapuza; Guillermo Salvatierra; Janet Huancachoque; Lenin Maturrano; Luis González; Pablo Tsukayama; Pedro E. Romero; Pool Marcos                                                                                                                                                                                                                                                                                                                                                                                                                                                                                                                                                                                                                                                                                                 |
| EPI_ISL_1652055, EPI_ISL_1652056, EPI_ISL_1652066                                                                                                                                                                                                                                                                                                                                                                                                      |           | Integrated Biorepository of H3Africa Uganda - IBRH3AU                                                                                                                                                                     | Molecular Biology Laboratory                                                                                                                                                                    | Ashaba Fred Katabazi; Bernard Ssentalo Bagaya; David Patrick Kateete; Edgar Kigozi; Emmanuel Nasinghe; Eric Katagiriya; Gerald Mboowa; Lwanga Newton; Misaki Wayengera; Moses Jobba; Moses Luutu; Nsubuga Gideon; Rogers Kamulegeya; Samuel Kirimunda; Sarah Stanley; Savannah Mwesigwa                                                                                                                                                                                                                                                                                                                                                                                                                                                                                                                                                                             |
| EPI_ISL_1910388, EPI_ISL_1910393, EPI_ISL_1910394                                                                                                                                                                                                                                                                                                                                                                                                      |           | Iressef Genomics lab                                                                                                                                                                                                      | IRESSEF                                                                                                                                                                                         | Abdou PADANE; Ambroise AHOUIDI; Aminata DIA; Aminata MBOUP; Astou Gaye GAYE; Barada CISSE; Birahim Piere NDIAYE; Gora LO; Khadim GUEYE; Moustapha MBOU; Nafisatou LEYE; Ndeye Coumba Toure KANE; Papa Alassane DIAW; Souleymane MBOUP; Yacine DIA                                                                                                                                                                                                                                                                                                                                                                                                                                                                                                                                                                                                                   |
| EPI_ISL_1167126                                                                                                                                                                                                                                                                                                                                                                                                                                        |           | Iressef Genomics lab                                                                                                                                                                                                      | L'institut de Recherche en Santé, de Surveillance Épidémiologique et de Formation (IRESSEF)                                                                                                     | Abdou PADANE; Abdoulie KANTEH; Abdul Karim SESAY; Ambroise AHOUIDI; Aminata DIA; Aminata MBOUP; Astou Gaye GAYE; Barada CISSE; Birahim Piere NDIAYE; Gora LO; Khadim GUEYE; Moustapha MBOU; Nafisatou LEYE; Ndeye Coumba Toure KANE; Papa Alassane DIAW; Souleymane MBOUP; Yacine DIA                                                                                                                                                                                                                                                                                                                                                                                                                                                                                                                                                                               |
| EPI_ISL_956387                                                                                                                                                                                                                                                                                                                                                                                                                                         |           | Isolation - Virology Unit, Institut Pasteur du Cambodge; Sequencing - US National Institute of Allergy and Infectious Diseases Cambodia, US Naval Medical Research Unit -2, Cambodia National Institute for Public Health | Virology Unit, Institut Pasteur du Cambodge                                                                                                                                                     | Chau Darapheak; Chin Savuth; Erik A Karlsson; Jennifer Bohl; Jessica Manning; Jose A Garcia-Rivera; Kraing Sidonn; Ly Sovann; Sophana Chea; Sreyngim Lay; Veasna Duong; Vireak Heang; Yi Sengdoeurm                                                                                                                                                                                                                                                                                                                                                                                                                                                                                                                                                                                                                                                                 |
| EPI_ISL_474961, EPI_ISL_474993, EPI_ISL_514283, EPI_ISL_516895                                                                                                                                                                                                                                                                                                                                                                                         |           | Israel Central Virology laboratory                                                                                                                                                                                        | Israel Central Virology laboratory                                                                                                                                                              | Efrat Dahan Bucris; Ella Mendelson; Michal Mandelboim; Neta Zuckerman; Oran Erster                                                                                                                                                                                                                                                                                                                                                                                                                                                                                                                                                                                                                                                                                                                                                                                  |
| EPI_ISL_889141, EPI_ISL_889144, EPI_ISL_1358451, EPI_ISL_1358730, EPI_ISL_1673926, EPI_ISL_1674071, EPI_ISL_1762169, EPI_ISL_1762197, EPI_ISL_1762331, EPI_ISL_1762892, EPI_ISL_2083388, EPI_ISL_2083509, EPI_ISL_2084191, EPI_ISL_2084611, EPI_ISL_2085286, EPI_ISL_2085796, EPI_ISL_2085811, EPI_ISL_2086062, EPI_ISL_2086083, EPI_ISL_2182766, EPI_ISL_2183496, EPI_ISL_2183568, EPI_ISL_2183627, EPI_ISL_2183701, EPI_ISL_2183704, EPI_ISL_2183715 | see above | Israel Central Virology laboratory                                                                                                                                                                                        | Israel National Consortium for SARS-CoV-2 sequencing                                                                                                                                            | Assaf Rokney; Dana Bar-Ilan; David A. Zeevi; Efrat Dahan Bucris; Efrat Glick-Saar; Efrat Rorman; Ella Mendelson; Ephraim Fass; Eva Nachum; Gal Zizelski Valenci; Gideon Rechavi; Israel Nissan; Joseph Jaffe; Maya Davidovich Cohen; Michal Mandelboim; Miranda Geva; Mor Rubinstein; Neta Zuckerman; Netanel Abu; Omer Murik; Omri Nayschool; Oran Erster; Orna Mor; Tzvia Mann                                                                                                                                                                                                                                                                                                                                                                                                                                                                                    |
| EPI_ISL_1424276, EPI_ISL_1424290, EPI_ISL_1759571                                                                                                                                                                                                                                                                                                                                                                                                      |           | Istituto Zooprofilattico Sperimentale del Mezzogiorno                                                                                                                                                                     | TIGEM                                                                                                                                                                                           | Andrea Ballabio; Anna Manfredi; Antonio Grimaldi; Antonia Grimaldi; Patrizia Annunziata Francesco Panariello Biancamaria Pierri Claudia Tiberio Teresa Giuliano Valentina Bouche Chiara Colantuono Maria Concetta Cuomo Denise Di Concilio Lucio Di Filippo Anna Manfredi Marcello Salvi Antonio Limone Luigi Atripaldi Pellegrino Cerino Andrea Ballabio Davide Cacchiarelli; Antonio Limone Luigi Atripaldi Pellegrino Cerino; Biancamaria Pierri Claudia Tiberio Valentina Bouche; Chiara Colantuono; Davide Cacchiarelli; Denise Di Concilio; Francesco Panariello; Lucio Di Filippo; Marcello Salvi; Maria Concetta Cuomo; Patrizia Annunziata                                                                                                                                                                                                                 |
| EPI_ISL_1254835                                                                                                                                                                                                                                                                                                                                                                                                                                        |           | Istituto Zooprofilattico Sperimentale del Mezzogiorno                                                                                                                                                                     | Telethon Institute of Genetics and Medicine (TIGEM)                                                                                                                                             | Antonio Grimaldi Patrizia Annunziata Francesco Panariello Biancamaria Pierri Claudia Tiberio Valentina Bouche Chiara Colantuono Maria Concetta Cuomo Denise Di Concilio Lucio Di Filippo Anna Manfredi Marcello Salvi Antonio Limone Luigi Atripaldi Pellegrino Cerino Andrea Ballabio Davide Cacchiarelli                                                                                                                                                                                                                                                                                                                                                                                                                                                                                                                                                          |
| EPI_ISL_779258, EPI_ISL_779275                                                                                                                                                                                                                                                                                                                                                                                                                         |           | Jamil-ur-Rahman Center for Genome Research, Dr. Panjwani Center for Molecular Medicine and Drug Research                                                                                                                  | Jamil-ur-Rahman Center for Genome Research, Dr. Panjwani Center for Molecular Medicine and Drug Research                                                                                        | Ansari, S.; Irfan, M.; Khan, I.; Nisa, Z.; Rashid, M.; Shakeel, M.                                                                                                                                                                                                                                                                                                                                                                                                                                                                                                                                                                                                                                                                                                                                                                                                  |
| EPI_ISL_416586, EPI_ISL_416602, EPI_ISL_416613                                                                                                                                                                                                                                                                                                                                                                                                         |           | Japanese Quarantine Stations                                                                                                                                                                                              | Pathogen Genomics Center, National Institute of Infectious Diseases                                                                                                                             | Hajime Kamiya; Hideki Hasegawa; Ikuyo Takayama; Kentaro Itokawa; Makoto Kuroda; Masanori Hashino; Motoi Suzuki; Rina Tanaka; Shinji Saito; Takaji Wakita; Takuri Takahashi; Takuya Yamagishi; Tsutomu Kageyama; Tsuyoshi Sekizuka                                                                                                                                                                                                                                                                                                                                                                                                                                                                                                                                                                                                                                   |
| EPI_ISL_862848                                                                                                                                                                                                                                                                                                                                                                                                                                         |           | Japanese Red Cross Narita Hospital                                                                                                                                                                                        | Fujita health University, School of Medicine, Department of Microbiology                                                                                                                        | Masahiro suzuki; Yohei Doi                                                                                                                                                                                                                                                                                                                                                                                                                                                                                                                                                                                                                                                                                                                                                                                                                                          |
| EPI_ISL_511872, EPI_ISL_1662816                                                                                                                                                                                                                                                                                                                                                                                                                        |           | Johns Hopkins Hospital Department of Pathology                                                                                                                                                                            | Johns Hopkins Hospital Department of Pathology                                                                                                                                                  | Adannaya Amadi; Amanda Ernlund; C. Paul Morris; Chun Huai Luo; Craig Howser; Heba H. Mostafa; Kristina Zudock; Mark Hopkins; Matthew Schwartz; Melanie Kirsche; Michael C. Schatz; Nidia Trovao; Norah Sadowski; Oluwaseun Falade-Nwulia; Paul Morris; Peter M. Thielen; Shirlee Wohl; Srividya Ramakrishnan; Stuart C. Ray; Thomas Mehoke; Victoria Gniazdowski; Winston Timp; Yunfan Fan                                                                                                                                                                                                                                                                                                                                                                                                                                                                          |
| EPI_ISL_2233384                                                                                                                                                                                                                                                                                                                                                                                                                                        |           | Johor Bahru Public Health Laboratory                                                                                                                                                                                      | Institute for Medical Research, Infectious Disease Research Centre, National Institutes of Health, Ministry of Health Malaysia                                                                  | Azizan MA; Karmel K; Mohd Zawawi Z; Ramly N; Robert F; Suppiah J; Thayan R                                                                                                                                                                                                                                                                                                                                                                                                                                                                                                                                                                                                                                                                                                                                                                                          |
| EPI_ISL_457878                                                                                                                                                                                                                                                                                                                                                                                                                                         |           | KEMRI-CGMR-C                                                                                                                                                                                                              | KEMRI-Wellcome Trust Research Programme/KEMRI-CGMR-C Kilifi                                                                                                                                     | Githinji G. et al 2020                                                                                                                                                                                                                                                                                                                                                                                                                                                                                                                                                                                                                                                                                                                                                                                                                                              |
| EPI_ISL_1440078, EPI_ISL_1440093, EPI_ISL_1440115, EPI_ISL_1440119, EPI_ISL_1440128, EPI_ISL_1440196, EPI_ISL_1440206, EPI_ISL_1440287, EPI_ISL_1440298, EPI_ISL_1610534                                                                                                                                                                                                                                                                               | see above | KEMRI-Wellcome Trust Research Programme,Kilifi                                                                                                                                                                            | KEMRI-Wellcome Trust Research Programme,Kilifi                                                                                                                                                  | Githinji G.; Matoke D.; Mburu M.W.; Mohamed K.S.; Thiongo K.; de Laurent Z.; deLaurent Z.                                                                                                                                                                                                                                                                                                                                                                                                                                                                                                                                                                                                                                                                                                                                                                           |
| EPI_ISL_806557, EPI_ISL_806586, EPI_ISL_806617, EPI_ISL_806623, EPI_ISL_806650, EPI_ISL_806697, EPI_ISL_968821, EPI_ISL_969004, EPI_ISL_969012, EPI_ISL_969013, EPI_ISL_969014                                                                                                                                                                                                                                                                         | see above | KEMRI-Wellcome Trust Research Programme/KEMRI-CGMR-C Kilifi                                                                                                                                                               | KEMRI-Wellcome Trust Research Programme/KEMRI-CGMR-C Kilifi                                                                                                                                     | Githinji et al                                                                                                                                                                                                                                                                                                                                                                                                                                                                                                                                                                                                                                                                                                                                                                                                                                                      |
| EPI_ISL_462157, EPI_ISL_1048849, EPI_ISL_1048979, EPI_ISL_1049011, EPI_ISL_1091396, EPI_ISL_1093207, EPI_ISL_1382376                                                                                                                                                                                                                                                                                                                                   | see above | KU Leuven, Rega Institute, Clinical and Epidemiological                                                                                                                                                                   | KU Leuven, Rega Institute, Clinical and Epidemiological                                                                                                                                         | Bert Vanmechelen; Joan Marti-Carerras; Piet Maes; Tony Wawina-Bokalanga                                                                                                                                                                                                                                                                                                                                                                                                                                                                                                                                                                                                                                                                                                                                                                                             |

|                                                                                   | Virology                                                                      | Virology                                                                                                                     |                                                                                                                                                                                                                                                                                                                                                                                                                                                                                                                                                                                                                                                                                                                                                                                                                                                                                                                                                                                    |
|-----------------------------------------------------------------------------------|-------------------------------------------------------------------------------|------------------------------------------------------------------------------------------------------------------------------|------------------------------------------------------------------------------------------------------------------------------------------------------------------------------------------------------------------------------------------------------------------------------------------------------------------------------------------------------------------------------------------------------------------------------------------------------------------------------------------------------------------------------------------------------------------------------------------------------------------------------------------------------------------------------------------------------------------------------------------------------------------------------------------------------------------------------------------------------------------------------------------------------------------------------------------------------------------------------------|
| EPI_ISL_2231570                                                                   | Kampong Cham Rapid Response Team                                              | Virology Unit, Institut Pasteur du Cambodge                                                                                  | Cecile Troupin; Chau Darapeak; Chin Savuth; Erik A Karlsson; Jurre Y Siegers; Kraing Sidonn; Leakhena Pum; Ly Sovann; Veasna Duong; Yi Sengdoeurn                                                                                                                                                                                                                                                                                                                                                                                                                                                                                                                                                                                                                                                                                                                                                                                                                                  |
| EPI_ISL_875678, EPI_ISL_883051, EPI_ISL_1067720, EPI_ISL_2007091, EPI_ISL_2157218 | Kansas Health and Environmental Lab                                           | Kansas Health and Environmental Lab                                                                                          | Ben Olsen; Carissa Robertson; Jonathan Barnell; Katherine Wiggins; Mike Grose; Paige Drury; and Phil Adam                                                                                                                                                                                                                                                                                                                                                                                                                                                                                                                                                                                                                                                                                                                                                                                                                                                                          |
| EPI_ISL_2233100, EPI_ISL_2233101, EPI_ISL_2233102, EPI_ISL_2233104                | Kantor Kesehatan Pelabuhan Kelas II Cilacap                                   | National Institute of Health Research and Development                                                                        | Arie Ardiansyah Nugraha; Hana Apsari Pawestri; Hartanti Dian Ikawati; Kartika Dewi Puspa; Krisna Pangesti; Nelly Puspendari; Subangkit; Triyani Soekarso; Vivi Setiawaty                                                                                                                                                                                                                                                                                                                                                                                                                                                                                                                                                                                                                                                                                                                                                                                                           |
| EPI_ISL_2047559                                                                   | Kantor Pengelola Sumbawa Technopark                                           | National Institute of Health Research and Development                                                                        | Arie Ardiansyah Nugraha; Arief Budi Witarto; Hana Apsari Pawestri; Hartanti Dian Ikawati; Kartika Dewi Puspa; Krisna Pangesti; Laily Indrayanti; Lalu Hamzi Fikri; Nelly Puspendari; Nurhandini Eka Dewi; Rian Adha Ardinata; Subangkit; Triyani Soekarso; Vivi Setiawaty                                                                                                                                                                                                                                                                                                                                                                                                                                                                                                                                                                                                                                                                                                          |
| EPI_ISL_2096966                                                                   | Kaplan Medical Center Infectious Diseases Unit, Rehovot, Israel               | Hadassah Hebrew University Viral Sequencing Group, Hadassah Hebrew University Medical Center                                 | Dana G. Wolf; Esther Oiknine-Djian; Hadar Golan Berman; Mila Rivkin; Sheera Adar                                                                                                                                                                                                                                                                                                                                                                                                                                                                                                                                                                                                                                                                                                                                                                                                                                                                                                   |
| EPI_ISL_454465, EPI_ISL_510862                                                    | Karolinska Universitetslaboratoriet                                           | The Public Health Agency of Sweden                                                                                           | Anna Risberg; Anna-Malin Linde; Karin Tegmark-Wisell; Maria Lind Karlberg; Mattias Haukland; Mia Brytting; Olov Svartstrom; Oskar Karlsson Lindsjo; Petra Edquist; Reza Advani; Sandra Brodesson; Shamam Muradrasoli                                                                                                                                                                                                                                                                                                                                                                                                                                                                                                                                                                                                                                                                                                                                                               |
| EPI_ISL_1313478                                                                   | Karolinska University Hospital                                                | Karolinska University Hospital                                                                                               | Annelie Bjerkner; Isak Sylvin; Jan Albert; Karolina Ininbergs; Lina Guerra Blomqvist; Lynda Eneh; Martin Ekman; Martina Wahlund; Robert Dyrdak; Sandra Brodesson; Tanja Normark; Tobias Allander; Valteri Wirta; Zhibing Yun                                                                                                                                                                                                                                                                                                                                                                                                                                                                                                                                                                                                                                                                                                                                                       |
| EPI_ISL_1859481                                                                   | Kazan Federal University, Academic Consortium                                 | FEDERAL RESEARCH AND CLINICAL CENTER OF PHYSICAL-CHEMICAL MEDICINE OF FEDERAL MEDICAL BIOLOGICAL AGENCY, Academic Consortium | Alexander Manolov; Alexander Pavlenko; Alexander Rumyantsev; Alexander Samoilov; Alexander Troitsky; Alexander Tulichev; Alexander Vasiliev; Alexey Volnukhin; Alla Petrova; Andrey Koritsky; Anna Blagonravova; Anna Varizhuk; Daria Boldyreva; Daria Kharlampieva; Daria Matyushkina; Dmitry Fedorov; Dmitry Pushkar; Ekaterina Moskaleva; Elena Galova; Elena Ilina; Elizaveta Orlova; Galina Yusubaliyeva; Gaukhar Yusubaliyeva; Ishat Gafurov; Irina Shirokova; Konstantin Ivanov; Konstantin Kolontarev; Ksenia Klimina; Larisa Balykova; Lyubov Rychkova; Nadezhda Kolyskina; Natalia Pozhenko; Oleg Ogarkov; Pavel Bashkirov; Polina Khromova; Polina Tikhonova; Ramiz Bakhtyev; Raushaniya Gaifullina; Sergey Rumyantsev; Svetlana Solovieva; Vadim Govorov; Valentin Manuvera; Varvara Musarova; Vasily Lazarev; Vladimir Baklaushiev; Vladimir Rumyantsev; Vladimir Veselovsky; Vladislav Babenko; Vyacheslav Kuropatkin; Vyacheslav Sinkov; Yulia Galeeva; Yuri Udalov |
| EPI_ISL_512812                                                                    | Kenema Government Hospital, Ministry of Health and Sanitation                 | Kenema Government Hospital, Ministry of Health and Sanitation                                                                | Andersen, K.; Garry, R.; Goba, A.; Grant, D.; Happi, C.; Jalloh, S.; Mehta, S.; Momoh, M.; Olawoye, I.; Oluniyi, P.; Park, D.; Sandi, J.; Siddle, K.; Tomkins-Tinch, C.                                                                                                                                                                                                                                                                                                                                                                                                                                                                                                                                                                                                                                                                                                                                                                                                            |
| EPI_ISL_1470388                                                                   | Kentucky State Public Health Lab                                              | Kentucky State Public Health Lab                                                                                             | Joshua Tobias; Karim George; Matthew Johnson; Rachel Zinner; Rhonda Lucas; Stephanie Lunn; Vaneet Arora; William Grooms                                                                                                                                                                                                                                                                                                                                                                                                                                                                                                                                                                                                                                                                                                                                                                                                                                                            |
| EPI_ISL_490010                                                                    | King Fahad Medical City                                                       | King Fahad Medical City                                                                                                      | Alghoraibi, M.; Alosaimi, B.; Enani, M.; Naeem, A.                                                                                                                                                                                                                                                                                                                                                                                                                                                                                                                                                                                                                                                                                                                                                                                                                                                                                                                                 |
| EPI_ISL_483547, EPI_ISL_483555                                                    | Kingdom of Bahrain Ministry of Health                                         | Erasmus Medical Center                                                                                                       | Amjad Ghanem Mohamed; Anne van der Linden; Bas Oude Munnink; Claudia Schapendonk; David Nieuwenhuijse; Ebrahim Shehad; Fatema; Hashmeya Al Wasti; Irina Chestakova; Marion Koopmans; Mark Pronk; Pascal Lexmond; Reina Sikkema; Richard Molenkamp; Stefan van Nieuwkoop; Theo Bestebroer; on behalf of the Dutch national COVID-19 response team.                                                                                                                                                                                                                                                                                                                                                                                                                                                                                                                                                                                                                                  |
| EPI_ISL_2232720                                                                   | Klinikum Wels-Grieskirchen                                                    | Bergthaler laboratory, CeMM Research Center for Molecular Medicine of the Austrian Academy of Sciences                       | Andreas Bergthaler; Anna Schedl; Bekir Erguner; Benedikt Agerer; Christoph Bock; Fabian Amman; Jan Laine; Lukas Endler; Maelle Le Moing; Martin Senekowitsch; Michael Schuster; Petr Triska; Thomas Penz                                                                                                                                                                                                                                                                                                                                                                                                                                                                                                                                                                                                                                                                                                                                                                           |
| EPI_ISL_2099935                                                                   | Klinisk mikrobiologi, Region Västerbotten                                     | CBRN Defence and Security, Swedish Defence Research Agency                                                                   | Andreas Sjödin; Anna-Lena Johansson; Annika Allard; Annika Osterman; Caroline Öhrman; David Sundell; Emelie Näslund Salomonsson; Ingrid Dacklin; Jonas Näslund; Kerstin Myrtennäs; Linda Karlsson; Malin Granberg; Mats Forsman; Stina Bäckman                                                                                                                                                                                                                                                                                                                                                                                                                                                                                                                                                                                                                                                                                                                                     |
| EPI_ISL_1298479                                                                   | Kosov CRH                                                                     | The Institute of Molecular Biology and Genetics of NASU                                                                      | M.Tukalo et al.                                                                                                                                                                                                                                                                                                                                                                                                                                                                                                                                                                                                                                                                                                                                                                                                                                                                                                                                                                    |
| EPI_ISL_1359919                                                                   | LABORATOIRE SYNERGIE                                                          | CNR Virus des Infections Respiratoires - France SUD                                                                          | Antonin Bal; Bruno Lina; Gregory Destras; Gwendolyne Burfin; Hadrien Regue; Laurence Josset; Martine Valette; Quentin Semanas                                                                                                                                                                                                                                                                                                                                                                                                                                                                                                                                                                                                                                                                                                                                                                                                                                                      |
| EPI_ISL_1196426                                                                   | LABORATORIO CLINICO CENAHCE                                                   | Incienza, Instituto Costarricense de Investigación y Enseñanza en Nutrición y Salud                                          | Adriana Godínez; Claudio Soto-Garita; Estela Cordero; Francisco Duarte; Hebleen Porras; Melany Calderón & Andrés Feoli-Grant                                                                                                                                                                                                                                                                                                                                                                                                                                                                                                                                                                                                                                                                                                                                                                                                                                                       |
| EPI_ISL_1067593, EPI_ISL_1379427                                                  | LABORATORIO CLINICO LABIN                                                     | Incienza, Instituto Costarricense de Investigación y Enseñanza en Nutrición y Salud                                          | Adriana Godínez; Caterina Guzmán; Claudio Soto-Garita; Estela Cordero; Francisco Duarte; Hebleen Porras; Melany Calderón; Melany Calderón & Pei Ling Chan Ma                                                                                                                                                                                                                                                                                                                                                                                                                                                                                                                                                                                                                                                                                                                                                                                                                       |
| EPI_ISL_682275                                                                    | LABORATORIOS LABIN                                                            | Incienza, Instituto Costarricense de Investigación y Enseñanza en Nutrición y Salud                                          | Adriana Godínez; Claudio Soto-Garita; Estela Cordero; Francisco Duarte; Hebleen Porras; Melany Calderon & Pei Ling Chan                                                                                                                                                                                                                                                                                                                                                                                                                                                                                                                                                                                                                                                                                                                                                                                                                                                            |
| EPI_ISL_1139056                                                                   | LACEN do Mato Grosso do Sul                                                   | Instituto Adolfo Lutz, Interdisciplinary Procedures Center, Strategic Laboratory                                             | Caio Vinicius Dias Lopes; Claudia Regina Gonçalves; Claudio Tavares Sacchi; Erica Valessa Ramos Gomes; Karoline Rodrigues Campos                                                                                                                                                                                                                                                                                                                                                                                                                                                                                                                                                                                                                                                                                                                                                                                                                                                   |
| EPI_ISL_940616                                                                    | LACEN-PI DR. Costa Alvarenga                                                  | Instituto Adolfo Lutz, Interdisciplinary Procedures Center, Strategic Laboratory                                             | Claudia Regina Gonçalves; Claudio Tavares Sacchi; Erica Valessa Ramos Gomes; Karoline Rodrigues Campos                                                                                                                                                                                                                                                                                                                                                                                                                                                                                                                                                                                                                                                                                                                                                                                                                                                                             |
| EPI_ISL_1213168, EPI_ISL_1213211                                                  | LAFEM/UESC                                                                    | Bioinformatics Laboratory / LNCC                                                                                             | Alessandra P Lamarca; Alexandra L Gerber; Ana Paula Melo Mariano; Ana Paula de C Guimarães; Ana Tereza R Vasconcelos; Angela Maria Guimarães Santos; Bianca Mendes Maciel; Danielle Angst Secco; Eduardo Sérgio Soares Sousa; Eloiza Helena Campana; Francisco Paulo Freire Neto; George Rego Albuquerque; Kátia Castanho Scortecchi; Lucymara Fassarella Agnez Lima; Luiz G P de Almeida; Luís Cristóvão Porto; Otavio J. Brustolini; Paulo Ricardo Nascimento; Ronaldo da Silva Francisco Jr; Sandra Rocha Gadelha; Selma Maria Bezerra Jeronimo; Vinicius Pietta Perez                                                                                                                                                                                                                                                                                                                                                                                                          |
| EPI_ISL_1418224                                                                   | LAM GEN-BIO GRAVANCHES                                                        | CNR Virus des Infections Respiratoires - France SUD                                                                          | Antonin Bal; Bruno Lina; Gregory Destras; Gwendolyne Burfin; Hadrien Regue; Laurence Josset; Martine Valette; Quentin Semanas                                                                                                                                                                                                                                                                                                                                                                                                                                                                                                                                                                                                                                                                                                                                                                                                                                                      |
| EPI_ISL_977500                                                                    | LATE - Laboratório de Técnicas Especiais - Hospital Israelita Albert Einstein | LATE - Laboratório de Técnicas Especiais - Hospital Israelita Albert Einstein                                                | Ana Paula Moreira Salles; Deyvid Amgarten; Fernanda de Mello Malta; João Renato Rebello Pinho; Pedro Henrique Sebe Rodrigues; Raquel Riyuzo                                                                                                                                                                                                                                                                                                                                                                                                                                                                                                                                                                                                                                                                                                                                                                                                                                        |
| EPI_ISL_1213215                                                                   | LBM/UFPB                                                                      | Bioinformatics Laboratory / LNCC                                                                                             | Alessandra P Lamarca; Alexandra L Gerber; Ana Paula Melo Mariano; Ana Paula de C Guimarães; Ana Tereza R Vasconcelos; Angela Maria Guimarães Santos; Bianca Mendes Maciel; Danielle Angst Secco; Eduardo Sérgio Soares Sousa; Eloiza Helena Campana; Francisco Paulo Freire Neto; George Rego Albuquerque; Kátia Castanho Scortecchi; Lucymara Fassarella Agnez Lima; Luiz G P de Almeida; Luís Cristóvão Porto; Otavio J. Brustolini; Paulo Ricardo Nascimento; Ronaldo da Silva Francisco Jr; Sandra Rocha Gadelha; Selma Maria Bezerra Jeronimo; Vinicius Pietta Perez                                                                                                                                                                                                                                                                                                                                                                                                          |
| EPI_ISL_1091785, EPI_ISL_1091786, EPI_ISL_1960075                                 | LDSP                                                                          | Universidad Nacional de Colombia - Laboratorio Genómico One Health                                                           | Andres F. Cardona-Rios; Carlos Franco-Muñoz; Carolina Muñoz-Arango; Celeny Ortiz; Daniel O. Maldonado-Perez; Diego A. Álvarez-Díaz; Hector Alejandro Ruiz-Moreno; Idabely Betancur Ortiz; Jorge E. Osorio; Juan P. Hernandez-Ortiz; Karl A Ciudodis; Katherine Laiton-Donato; Laura Silvana Perez; Lina M. Hurtado; Marcela Mercado-Reyes; María Angélica Maya; María Stella López; Rita Almanza Payares; Sandra Ines Cano; Simón Villegas Velásquez                                                                                                                                                                                                                                                                                                                                                                                                                                                                                                                               |
| EPI_ISL_1820929                                                                   | LDSP BARRANQUILLA                                                             | Instituto Nacional de Salud- Dirección de Investigación en Salud Pública                                                     | Carlos Franco-Muñoz; Carmen Osorio; Christian Romero; Diana Malo; Diego A. Álvarez-Díaz; Diego Andrés Prada; Gerardo Santamaría; Hector Alejandro Ruiz-Moreno; Jhonnatan Reales-González; Jorge Rivera; Juan Camilo Martínez; Julian Naizague; Katherine Laiton-Donato; Lisseth Pardo; Magdalena Wiesner; Marcela Mercado-Reyes; María T. Herrera-Sepúlveda; Marta Lopez Blanco; Martha Lucia Ospina Martínez; Paola Rojas; Patricia del Portillo; Sergio Gomez; Sheryll Corchuelo; Ángela Alarcon Cruz                                                                                                                                                                                                                                                                                                                                                                                                                                                                            |
| EPI_ISL_1805743                                                                   | LDSP CALDAS                                                                   | Instituto Nacional de Salud- Dirección de Investigación en Salud Pública                                                     | Carlos Franco-Muñoz; Carmen Osorio; Diana Malo; Diego A. Álvarez-Díaz; Diego Andrés Prada; Gerardo Santamaría; Hector Alejandro Ruiz-Moreno; Jhonnatan Reales-González; Jorge Rivera; Juan Camilo Martínez; Julian Naizague; Katherine Laiton-Donato; Lisseth Pardo; Magdalena Wiesner; Marcela Mercado-Reyes; María T. Herrera-Sepúlveda; Marta Lopez Blanco; Martha Lucia Ospina Martínez; Paola Rojas; Sergio Gomez; Sheryll Corchuelo; Ángela Alarcon Cruz                                                                                                                                                                                                                                                                                                                                                                                                                                                                                                                     |
| EPI_ISL_1710972, EPI_ISL_2139909                                                  | LESP Baja California                                                          | Instituto de Diagnostico y Referencia Epidemiologicos (INDRE)                                                                | Abril Rodriguez-Maldonado; Ariadna Medina-Benitez; Claudia Wong-Arambula; Ernesto Ramirez-Gonzalez.; Gisela Barrera-Badillo; Irma Lopez-Martinez; Joaquin Quiroz-Mercado; Lucia Hernandez-Rivas; Natividad Cruz-Ortiz; Sergio Rangel-Guerrero; Tatiana Nunez-Garcia; Vanessa Rivero-Arredondo                                                                                                                                                                                                                                                                                                                                                                                                                                                                                                                                                                                                                                                                                      |
| EPI_ISL_1651893, EPI_ISL_1857226                                                  | LESP Baja California Sur                                                      | Instituto de Diagnostico y Referencia Epidemiologicos (INDRE)                                                                | Abril Rodriguez-Maldonado; Ariadna Medina-Benitez; Claudia Wong-Arambula; Ernesto Ramirez-Gonzalez.; Gisela Barrera-Badillo; Irma Lopez-Martinez; Joaquin Quiroz-Mercado; Lucia Hernandez-Rivas; Natividad Cruz-Ortiz; Sergio Rangel-Guerrero; Tatiana Nunez-Garcia; Vanessa Rivero-Arredondo                                                                                                                                                                                                                                                                                                                                                                                                                                                                                                                                                                                                                                                                                      |

|                                                                                                                                                                                                                                                                                                                                                                                                                                                                                                                                                                                                            |                                        |                                                               |                                                                                                                                                                                                                                                                                                 |                                                                                                                                                                                                                                                                                                                                                                                                                                                                                                                                                                                                                                                            |                                                     |                                           |                     |                       |                       |                       |                               |                                                                                                                                    |
|------------------------------------------------------------------------------------------------------------------------------------------------------------------------------------------------------------------------------------------------------------------------------------------------------------------------------------------------------------------------------------------------------------------------------------------------------------------------------------------------------------------------------------------------------------------------------------------------------------|----------------------------------------|---------------------------------------------------------------|-------------------------------------------------------------------------------------------------------------------------------------------------------------------------------------------------------------------------------------------------------------------------------------------------|------------------------------------------------------------------------------------------------------------------------------------------------------------------------------------------------------------------------------------------------------------------------------------------------------------------------------------------------------------------------------------------------------------------------------------------------------------------------------------------------------------------------------------------------------------------------------------------------------------------------------------------------------------|-----------------------------------------------------|-------------------------------------------|---------------------|-----------------------|-----------------------|-----------------------|-------------------------------|------------------------------------------------------------------------------------------------------------------------------------|
| EPI_ISL_1424015, EPI_ISL_1483066, EPI_ISL_1754139, EPI_ISL_2139921                                                                                                                                                                                                                                                                                                                                                                                                                                                                                                                                         | LESP Campeche                          | Instituto de Diagnostico y Referencia Epidemiologicos (INDRE) | Abril Rodríguez-Maldonado; Ariadna Medina-Benitez; Claudia Wong-Arambula; Ernesto Ramirez-Gonzalez.; Gisela Barrera-Badillo; Irma Lopez-Martinez; Joaquin Quiroz-Mercado; Lucia Hernandez-Rivas; Natividad Cruz-Ortiz; Sergio Rangel-Guerrero; Tatiana Nunez-Garcia; Vanessa Rivero-Arredondo   |                                                                                                                                                                                                                                                                                                                                                                                                                                                                                                                                                                                                                                                            |                                                     |                                           |                     |                       |                       |                       |                               |                                                                                                                                    |
| EPI_ISL_1626810, EPI_ISL_1700795                                                                                                                                                                                                                                                                                                                                                                                                                                                                                                                                                                           | LESP Chiapas                           | Instituto de Diagnostico y Referencia Epidemiologicos (INDRE) | Abril Rodríguez-Maldonado; Ariadna Medina-Benitez; Claudia Wong-Arambula; Ernesto Ramirez-Gonzalez.; Gisela Barrera-Badillo; Irma Lopez-Martinez; Joaquin Quiroz-Mercado; Lucia Hernandez-Rivas; Natividad Cruz-Ortiz; Sergio Rangel-Guerrero; Tatiana Nunez-Garcia; Vanessa Rivero-Arredondo   |                                                                                                                                                                                                                                                                                                                                                                                                                                                                                                                                                                                                                                                            |                                                     |                                           |                     |                       |                       |                       |                               |                                                                                                                                    |
| EPI_ISL_1494626, EPI_ISL_1626801, EPI_ISL_1651877                                                                                                                                                                                                                                                                                                                                                                                                                                                                                                                                                          | LESP Chihuahua                         | Instituto de Diagnostico y Referencia Epidemiologicos (INDRE) | Abril Rodríguez-Maldonado; Ariadna Medina-Benitez; Claudia Wong-Arambula; Ernesto Ramirez-Gonzalez.; Gisela Barrera-Badillo; Irma Lopez-Martinez; Joaquin Quiroz-Mercado; Lucia Hernandez-Rivas; Natividad Cruz-Ortiz; Sergio Rangel-Guerrero; Tatiana Nunez-Garcia; Vanessa Rivero-Arredondo   |                                                                                                                                                                                                                                                                                                                                                                                                                                                                                                                                                                                                                                                            |                                                     |                                           |                     |                       |                       |                       |                               |                                                                                                                                    |
| EPI_ISL_1857232, EPI_ISL_2101901                                                                                                                                                                                                                                                                                                                                                                                                                                                                                                                                                                           | LESP Coahuila                          | Instituto de Diagnostico y Referencia Epidemiologicos (INDRE) | Abril Rodríguez-Maldonado; Ariadna Medina-Benitez; Claudia Wong-Arambula; Ernesto Ramirez-Gonzalez.; Gisela Barrera-Badillo; Irma Lopez-Martinez; Joaquin Quiroz-Mercado; Lucia Hernandez-Rivas; Natividad Cruz-Ortiz; Sergio Rangel-Guerrero; Tatiana Nunez-Garcia; Vanessa Rivero-Arredondo   |                                                                                                                                                                                                                                                                                                                                                                                                                                                                                                                                                                                                                                                            |                                                     |                                           |                     |                       |                       |                       |                               |                                                                                                                                    |
| EPI_ISL_1337395, EPI_ISL_1821107, EPI_ISL_2158138, EPI_ISL_2158139, EPI_ISL_2158140                                                                                                                                                                                                                                                                                                                                                                                                                                                                                                                        | LESP Colima                            | Instituto de Diagnostico y Referencia Epidemiologicos (INDRE) | Abril Rodríguez-Maldonado; Ariadna Medina-Benitez; Claudia Wong-Arambula; Ernesto Ramirez-Gonzalez.; Gisela Barrera-Badillo; Irma Lopez-Martinez; Joaquin Quiroz-Mercado; Lucia Hernandez-Rivas; Natividad Cruz-Ortiz; Sergio Rangel-Guerrero; Tatiana Nunez-Garcia; Vanessa Rivero-Arredondo   |                                                                                                                                                                                                                                                                                                                                                                                                                                                                                                                                                                                                                                                            |                                                     |                                           |                     |                       |                       |                       |                               |                                                                                                                                    |
| EPI_ISL_1821108, EPI_ISL_2105685                                                                                                                                                                                                                                                                                                                                                                                                                                                                                                                                                                           | LESP Guanajuato                        | Instituto de Diagnostico y Referencia Epidemiologicos (INDRE) | Abril Rodríguez-Maldonado; Ariadna Medina-Benitez; Claudia Wong-Arambula; Ernesto Ramirez-Gonzalez.; Gisela Barrera-Badillo; Irma Lopez-Martinez; Joaquin Quiroz-Mercado; Lucia Hernandez-Rivas; Natividad Cruz-Ortiz; Sergio Rangel-Guerrero; Tatiana Nunez-Garcia; Vanessa Rivero-Arredondo   |                                                                                                                                                                                                                                                                                                                                                                                                                                                                                                                                                                                                                                                            |                                                     |                                           |                     |                       |                       |                       |                               |                                                                                                                                    |
| EPI_ISL_1483073, EPI_ISL_1821149                                                                                                                                                                                                                                                                                                                                                                                                                                                                                                                                                                           | LESP Guerrero                          | Instituto de Diagnostico y Referencia Epidemiologicos (INDRE) | Abril Rodríguez-Maldonado; Ariadna Medina-Benitez; Claudia Wong-Arambula; Ernesto Ramirez-Gonzalez.; Gisela Barrera-Badillo; Irma Lopez-Martinez; Joaquin Quiroz-Mercado; Lucia Hernandez-Rivas; Natividad Cruz-Ortiz; Sergio Rangel-Guerrero; Tatiana Nunez-Garcia; Vanessa Rivero-Arredondo   |                                                                                                                                                                                                                                                                                                                                                                                                                                                                                                                                                                                                                                                            |                                                     |                                           |                     |                       |                       |                       |                               |                                                                                                                                    |
| EPI_ISL_1821196                                                                                                                                                                                                                                                                                                                                                                                                                                                                                                                                                                                            | LESP Hidalgo                           | Instituto de Diagnostico y Referencia Epidemiologicos (INDRE) | Abril Rodríguez-Maldonado; Ariadna Medina-Benitez; Claudia Wong-Arambula; Ernesto Ramirez-Gonzalez.; Gisela Barrera-Badillo; Irma Lopez-Martinez; Joaquin Quiroz-Mercado; Lucia Hernandez-Rivas; Natividad Cruz-Ortiz; Sergio Rangel-Guerrero; Tatiana Nunez-Garcia; Vanessa Rivero-Arredondo   |                                                                                                                                                                                                                                                                                                                                                                                                                                                                                                                                                                                                                                                            |                                                     |                                           |                     |                       |                       |                       |                               |                                                                                                                                    |
| EPI_ISL_1366662, EPI_ISL_1399259                                                                                                                                                                                                                                                                                                                                                                                                                                                                                                                                                                           | LESP Jalisco                           | Instituto de Diagnostico y Referencia Epidemiologicos (INDRE) | Abril Rodríguez-Maldonado; Ariadna Medina-Benitez; Claudia Wong-Arambula; Ernesto Ramirez-Gonzalez.; Gisela Barrera-Badillo; Irma Lopez-Martinez; Joaquin Quiroz-Mercado; Lucia Hernandez-Rivas; Natividad Cruz-Ortiz; Sergio Rangel-Guerrero; Tatiana Nunez-Garcia; Vanessa Rivero-Arredondo   |                                                                                                                                                                                                                                                                                                                                                                                                                                                                                                                                                                                                                                                            |                                                     |                                           |                     |                       |                       |                       |                               |                                                                                                                                    |
| EPI_ISL_1558830                                                                                                                                                                                                                                                                                                                                                                                                                                                                                                                                                                                            | LESP Jalisco/UdeG                      | Instituto de Diagnostico y Referencia Epidemiologicos (INDRE) | Abril Rodríguez-Maldonado; Ariadna Medina-Benitez; Claudia Wong-Arambula; Ernesto Ramirez-Gonzalez.; Gisela Barrera-Badillo; Irma Lopez-Martinez; Joaquin Quiroz-Mercado; Lucia Hernandez-Rivas; Natividad Cruz-Ortiz; Sergio Rangel-Guerrero; Tatiana Nunez-Garcia; Vanessa Rivero-Arredondo   |                                                                                                                                                                                                                                                                                                                                                                                                                                                                                                                                                                                                                                                            |                                                     |                                           |                     |                       |                       |                       |                               |                                                                                                                                    |
| EPI_ISL_1400308, EPI_ISL_1821140                                                                                                                                                                                                                                                                                                                                                                                                                                                                                                                                                                           | LESP Morelos                           | Instituto de Diagnostico y Referencia Epidemiologicos (INDRE) | Abril Rodríguez-Maldonado; Ariadna Medina-Benitez; Claudia Wong-Arambula; Ernesto Ramirez-Gonzalez.; Gisela Barrera-Badillo; Irma Lopez-Martinez; Joaquin Quiroz-Mercado; Lucia Hernandez-Rivas; Natividad Cruz-Ortiz; Sergio Rangel-Guerrero; Tatiana Nunez-Garcia; Vanessa Rivero-Arredondo   |                                                                                                                                                                                                                                                                                                                                                                                                                                                                                                                                                                                                                                                            |                                                     |                                           |                     |                       |                       |                       |                               |                                                                                                                                    |
| EPI_ISL_1399273                                                                                                                                                                                                                                                                                                                                                                                                                                                                                                                                                                                            | LESP Nayarit                           | Instituto de Diagnostico y Referencia Epidemiologicos (INDRE) | Abril Rodríguez-Maldonado; Ariadna Medina-Benitez; Claudia Wong-Arambula; Ernesto Ramirez-Gonzalez.; Gisela Barrera-Badillo; Irma Lopez-Martinez; Joaquin Quiroz-Mercado; Lucia Hernandez-Rivas; Natividad Cruz-Ortiz; Sergio Rangel-Guerrero; Tatiana Nunez-Garcia; Vanessa Rivero-Arredondo   |                                                                                                                                                                                                                                                                                                                                                                                                                                                                                                                                                                                                                                                            |                                                     |                                           |                     |                       |                       |                       |                               |                                                                                                                                    |
| EPI_ISL_1365640, EPI_ISL_1399269, EPI_ISL_1504067, EPI_ISL_1805504                                                                                                                                                                                                                                                                                                                                                                                                                                                                                                                                         | LESP Nuevo Leon                        | Instituto de Diagnostico y Referencia Epidemiologicos (INDRE) | Abril Rodríguez-Maldonado; Ariadna Medina-Benitez; Claudia Wong-Arambula; Ernesto Ramirez-Gonzalez.; Gisela Barrera-Badillo; Irma Lopez-Martinez; Joaquin Quiroz-Mercado; Lucia Hernandez-Rivas; Natividad Cruz-Ortiz; Sergio Rangel-Guerrero; Tatiana Nunez-Garcia; Vanessa Rivero-Arredondo   |                                                                                                                                                                                                                                                                                                                                                                                                                                                                                                                                                                                                                                                            |                                                     |                                           |                     |                       |                       |                       |                               |                                                                                                                                    |
| EPI_ISL_1366669, EPI_ISL_1424028, EPI_ISL_1912940                                                                                                                                                                                                                                                                                                                                                                                                                                                                                                                                                          | LESP Queretaro                         | Instituto de Diagnostico y Referencia Epidemiologicos (INDRE) | Abril Rodríguez-Maldonado; Ariadna Medina-Benitez; Claudia Wong-Arambula; Ernesto Ramirez-Gonzalez.; Gisela Barrera-Badillo; Irma Lopez-Martinez; Joaquin Quiroz-Mercado; Lucia Hernandez-Rivas; Natividad Cruz-Ortiz; Sergio Rangel-Guerrero; Tatiana Nunez-Garcia; Vanessa Rivero-Arredondo   |                                                                                                                                                                                                                                                                                                                                                                                                                                                                                                                                                                                                                                                            |                                                     |                                           |                     |                       |                       |                       |                               |                                                                                                                                    |
| EPI_ISL_1365661                                                                                                                                                                                                                                                                                                                                                                                                                                                                                                                                                                                            | LESP Quintana Roo                      | Instituto de Diagnostico y Referencia Epidemiologicos (INDRE) | Abril Rodríguez-Maldonado; Ariadna Medina-Benitez; Claudia Wong-Arambula; Ernesto Ramirez-Gonzalez.; Gisela Barrera-Badillo; Irma Lopez-Martinez; Joaquin Quiroz-Mercado; Lucia Hernandez-Rivas; Natividad Cruz-Ortiz; Sergio Rangel-Guerrero; Tatiana Nunez-Garcia; Vanessa Rivero-Arredondo   |                                                                                                                                                                                                                                                                                                                                                                                                                                                                                                                                                                                                                                                            |                                                     |                                           |                     |                       |                       |                       |                               |                                                                                                                                    |
| EPI_ISL_1337389, EPI_ISL_2246837                                                                                                                                                                                                                                                                                                                                                                                                                                                                                                                                                                           | LESP Sinaloa                           | Instituto de Diagnostico y Referencia Epidemiologicos (INDRE) | Abril Rodríguez-Maldonado; Ariadna Medina-Benitez; Claudia Wong-Arambula; Ernesto Ramirez-Gonzalez.; Gisela Barrera-Badillo; Irma Lopez-Martinez; Joaquin Quiroz-Mercado; Lucia Hernandez-Rivas; Natividad Cruz-Ortiz; Sergio Rangel-Guerrero; Tatiana Nunez-Garcia; Vanessa Rivero-Arredondo   |                                                                                                                                                                                                                                                                                                                                                                                                                                                                                                                                                                                                                                                            |                                                     |                                           |                     |                       |                       |                       |                               |                                                                                                                                    |
| EPI_ISL_1821160, EPI_ISL_1857254                                                                                                                                                                                                                                                                                                                                                                                                                                                                                                                                                                           | LESP Tamaulipas                        | Instituto de Diagnostico y Referencia Epidemiologicos (INDRE) | Abril Rodríguez-Maldonado; Ariadna Medina-Benitez; Claudia Wong-Arambula; Ernesto Ramirez-Gonzalez.; Gisela Barrera-Badillo; Irma Lopez-Martinez; Joaquin Quiroz-Mercado; Lucia Hernandez-Rivas; Natividad Cruz-Ortiz; Sergio Rangel-Guerrero; Tatiana Nunez-Garcia; Vanessa Rivero-Arredondo   |                                                                                                                                                                                                                                                                                                                                                                                                                                                                                                                                                                                                                                                            |                                                     |                                           |                     |                       |                       |                       |                               |                                                                                                                                    |
| EPI_ISL_1857257                                                                                                                                                                                                                                                                                                                                                                                                                                                                                                                                                                                            | LESP Tlaxcala                          | Instituto de Diagnostico y Referencia Epidemiologicos (INDRE) | Abril Rodríguez-Maldonado; Ariadna Medina-Benitez; Claudia Wong-Arambula; Ernesto Ramirez-Gonzalez.; Gisela Barrera-Badillo; Irma Lopez-Martinez; Joaquin Quiroz-Mercado; Lucia Hernandez-Rivas; Natividad Cruz-Ortiz; Sergio Rangel-Guerrero; Tatiana Nunez-Garcia; Vanessa Rivero-Arredondo   |                                                                                                                                                                                                                                                                                                                                                                                                                                                                                                                                                                                                                                                            |                                                     |                                           |                     |                       |                       |                       |                               |                                                                                                                                    |
| EPI_ISL_1857205, EPI_ISL_1857253                                                                                                                                                                                                                                                                                                                                                                                                                                                                                                                                                                           | LESP Yucatan                           | Instituto de Diagnostico y Referencia Epidemiologicos (INDRE) | Abril Rodríguez-Maldonado; Ariadna Medina-Benitez; Claudia Wong-Arambula; Ernesto Ramirez-Gonzalez.; Gisela Barrera-Badillo; Irma Lopez-Martinez; Joaquin Quiroz-Mercado; Lucia Hernandez-Rivas; Natividad Cruz-Ortiz; Sergio Rangel-Guerrero; Tatiana Nunez-Garcia; Vanessa Rivero-Arredondo   |                                                                                                                                                                                                                                                                                                                                                                                                                                                                                                                                                                                                                                                            |                                                     |                                           |                     |                       |                       |                       |                               |                                                                                                                                    |
| EPI_ISL_1821173                                                                                                                                                                                                                                                                                                                                                                                                                                                                                                                                                                                            | LESP Zacatecas                         | Instituto de Diagnostico y Referencia Epidemiologicos (INDRE) | Abril Rodríguez-Maldonado; Ariadna Medina-Benitez; Claudia Wong-Arambula; Ernesto Ramirez-Gonzalez.; Gisela Barrera-Badillo; Irma Lopez-Martinez; Joaquin Quiroz-Mercado; Lucia Hernandez-Rivas; Natividad Cruz-Ortiz; Sergio Rangel-Guerrero; Tatiana Nunez-Garcia; Vanessa Rivero-Arredondo   |                                                                                                                                                                                                                                                                                                                                                                                                                                                                                                                                                                                                                                                            |                                                     |                                           |                     |                       |                       |                       |                               |                                                                                                                                    |
| EPI_ISL_1532259, EPI_ISL_1661536                                                                                                                                                                                                                                                                                                                                                                                                                                                                                                                                                                           | LESPZacatecas                          | Instituto de Diagnostico y Referencia Epidemiologicos (INDRE) | Abril Rodríguez-Maldonado; Ariadna Medina-Benitez; Claudia Wong-Arambula; Ernesto Ramirez-Gonzalez.; Gisela Barrera-Badillo; Irma Lopez-Martinez; Joaquin Quiroz-Mercado; Lucia Hernandez-Rivas; Natividad Cruz-Ortiz; Sergio Rangel-Guerrero; Tatiana Nunez-Garcia; Vanessa Rivero-Arredondo   |                                                                                                                                                                                                                                                                                                                                                                                                                                                                                                                                                                                                                                                            |                                                     |                                           |                     |                       |                       |                       |                               |                                                                                                                                    |
| EPI_ISL_1219282                                                                                                                                                                                                                                                                                                                                                                                                                                                                                                                                                                                            | LIC                                    | Latvian Biomedical Research and Study Centre                  | David Fridmanis; Diana Dusacka; Guntars Zarins; Ivars Silamikelis; Janis Klovins; Janis Pjalkovskis; Juris Perovoscikovs; Kaspars Megnis; Laila Silamikele; Lauma Freimane; Laura Anson; Liga Birzniece; Monta Ustinova; Nikita Zrelavs; Reinis Zeltmatis; Uga Dumpis; Una Krumina; Vita Rovite |                                                                                                                                                                                                                                                                                                                                                                                                                                                                                                                                                                                                                                                            |                                                     |                                           |                     |                       |                       |                       |                               |                                                                                                                                    |
| EPI_ISL_1039640                                                                                                                                                                                                                                                                                                                                                                                                                                                                                                                                                                                            | LSUHS Emerging Viral Threat Laboratory | Microbial Genome Sequencing Center                            | Andrew D. Yurochko; Christopher G. Kevil; Daniel J. Snyder; Jennifer L. Carroll; Jeremy P. Kamil; John A. Vanchiere; Maarten Van Diest; Rona S. Scott; Vaughn S. Cooper                                                                                                                         |                                                                                                                                                                                                                                                                                                                                                                                                                                                                                                                                                                                                                                                            |                                                     |                                           |                     |                       |                       |                       |                               |                                                                                                                                    |
| EPI_ISL_1969245                                                                                                                                                                                                                                                                                                                                                                                                                                                                                                                                                                                            | Lab RSUP DR Mohammad Hoesin Palembang  | National Institute of Health Research and Development         | Arie Ardiansyah Nugraha; Hana Apsari Pawestri; Hartanti Dian Ikawati; Kartika Dewi Puspa; Krisna Pangesti; Nelly Puspendari; Subangkit; Triyani Soekarso; Vivi Setiawaty                                                                                                                        |                                                                                                                                                                                                                                                                                                                                                                                                                                                                                                                                                                                                                                                            |                                                     |                                           |                     |                       |                       |                       |                               |                                                                                                                                    |
| EPI_ISL_1109781, EPI_ISL_1118843, EPI_ISL_1273165                                                                                                                                                                                                                                                                                                                                                                                                                                                                                                                                                          | Lab voor klinische biologie            | Lab voor klinische biologie                                   | Bruno Verhasselt; Hannelore Hamerlinck; Marija Janevska                                                                                                                                                                                                                                         |                                                                                                                                                                                                                                                                                                                                                                                                                                                                                                                                                                                                                                                            |                                                     |                                           |                     |                       |                       |                       |                               |                                                                                                                                    |
| EPI_ISL_456388, EPI_ISL_548071, EPI_ISL_579105, EPI_ISL_626354, EPI_ISL_637091, EPI_ISL_707796, EPI_ISL_732965, EPI_ISL_1016847, EPI_ISL_1016851, EPI_ISL_1016858, EPI_ISL_1016859, EPI_ISL_1016861, EPI_ISL_1016862, EPI_ISL_1016867, EPI_ISL_1016869, EPI_ISL_1016880, EPI_ISL_1082263, EPI_ISL_1082265, EPI_ISL_1172028, EPI_ISL_1250700, EPI_ISL_1250704, EPI_ISL_1315324, EPI_ISL_1315326, EPI_ISL_1469090, EPI_ISL_1469101, EPI_ISL_1469104, EPI_ISL_1621309, EPI_ISL_1621312, EPI_ISL_1621317, EPI_ISL_1904851, EPI_ISL_1904853, EPI_ISL_1967901, EPI_ISL_1967902, EPI_ISL_2103201, EPI_ISL_2103202 | see above                              | LabPLUS                                                       | Institute of Environmental Science and Research (ESR)                                                                                                                                                                                                                                           | Anja Werno; Antje van der Linden; Arlo Upton; Chris Mansell; David Hammer; Dragana Drinkovic; Erasmus Smit; Gary McAuliffe; Hana Sofia Andersson; Hermes Perez; James Ussher; Jill Sherwood; Jing Wang; Joep de Ligt; Josh Freeman; Julia Howard; Juliet Elvy; Lauren Jolly; Mary DeAlmeida; Matt Blakiston; Matt Storey; Matthew Rogers; Max Bloomfield; Michael Addidle; Michelle Balm; Muhammad Faisal; Nikki Freed; Olin Silander; Olivia Stroeven; Rachel Boyle; Sally Roberts; SallyAnn Harbison; Sarah Jefferies; Sharmini Muttaiyah; Susan Morpeth; Susan Taylor; Timothy Blackmore; Vani Sathyendran; Veronica Playle; Virginia Hope; Xiaoyun Ren |                                                     |                                           |                     |                       |                       |                       |                               |                                                                                                                                    |
| EPI_ISL_548104, EPI_ISL_548105, EPI_ISL_579058, EPI_ISL_579099, EPI_ISL_637084, EPI_ISL_1315317                                                                                                                                                                                                                                                                                                                                                                                                                                                                                                            | see above                              | LabTests                                                      | Institute of Environmental Science and Research (ESR)                                                                                                                                                                                                                                           | Anja Werno; Antje van der Linden; Arlo Upton; Chris Mansell; David Hammer; Dragana Drinkovic; Erasmus Smit; Gary McAuliffe; Hana Sofia Andersson; Hermes Perez; James Ussher; Jill Sherwood; Jing Wang; Joep de Ligt; Josh Freeman; Julia Howard; Juliet Elvy; Lauren Jolly; Mary DeAlmeida; Matt Blakiston; Matt Storey; Matthew Rogers; Max Bloomfield; Michael Addidle; Michelle Balm; Muhammad Faisal; Nikki Freed; Olin Silander; Olivia Stroeven; Rachel Boyle; Sally Roberts; SallyAnn Harbison; Sarah Jefferies; Sharmini Muttaiyah; Susan Morpeth; Susan Taylor; Timothy Blackmore; Vani Sathyendran; Veronica Playle; Virginia Hope; Xiaoyun Ren |                                                     |                                           |                     |                       |                       |                       |                               |                                                                                                                                    |
| EPI_ISL_872290, EPI_ISL_1219949, EPI_ISL_1219962, EPI_ISL_1219963, EPI_ISL_1517463, EPI_ISL_2188484, EPI_ISL_2188485, EPI_ISL_2188486, EPI_ISL_2188487, EPI_ISL_2188488, EPI_ISL_2188489                                                                                                                                                                                                                                                                                                                                                                                                                   | see above                              | Labo Analyses Med                                             | National Reference Center for Viruses of Respiratory Infections, Institut Pasteur, Paris                                                                                                                                                                                                        | Adamou Lagare; Angela Brisebarre; Camille Capel; Christophe Malabat; Corinne Maufrais; Durivault Jérôme; Etienne Simon-Lorière; Frédéric Lemoine; Gael Millot; Hue; Louise Lefrançois; Marion Barbet; Maud Vanpeene; Méline Bizard; Sylvie Behillil; Sylvie Van der Werf; Sylvie van der Werf; Vincent Enouf                                                                                                                                                                                                                                                                                                                                               |                                                     |                                           |                     |                       |                       |                       |                               |                                                                                                                                    |
| EPI_ISL_1287177                                                                                                                                                                                                                                                                                                                                                                                                                                                                                                                                                                                            | EPI_ISL_1846232                        | EPI_ISL_1282950                                               | EPI_ISL_775221                                                                                                                                                                                                                                                                                  | Labor Dr. Wisplinghoff - Köln                                                                                                                                                                                                                                                                                                                                                                                                                                                                                                                                                                                                                              | Labor MÄInchengladbach MVZ Dr. Stein + Kollegen GbR | Labor ZOTZIKLIMAS; MVZ Düsseldorf-Centrum | Laboratoire Biolife | Robert Koch Institute | Robert Koch Institute | Robert Koch Institute | Laboratoire de Biotechnologie | Afaf Alaoui; Amina Benouda; Bouchra Belqhui; Hanae Dakka; Lahcen belyamani; Mohamed Chenaoui; Mohammed Walid Chemao Elfihri; Mouna |

|                                                                                                                                                                          |           |                                                                                       |                                                                                                                                                                       |                                                                                                                                                                                                                                                                                                                                                                                                                                                                                                                                                                                                                                                                                                                                                                                                                                                                                                                                                                                                                                               |
|--------------------------------------------------------------------------------------------------------------------------------------------------------------------------|-----------|---------------------------------------------------------------------------------------|-----------------------------------------------------------------------------------------------------------------------------------------------------------------------|-----------------------------------------------------------------------------------------------------------------------------------------------------------------------------------------------------------------------------------------------------------------------------------------------------------------------------------------------------------------------------------------------------------------------------------------------------------------------------------------------------------------------------------------------------------------------------------------------------------------------------------------------------------------------------------------------------------------------------------------------------------------------------------------------------------------------------------------------------------------------------------------------------------------------------------------------------------------------------------------------------------------------------------------------|
| EPI_ISL_1508821, EPI_ISL_1508849, EPI_ISL_1508890, EPI_ISL_1508897, EPI_ISL_1508947, EPI_ISL_1508991, EPI_ISL_1524723, EPI_ISL_1575444, EPI_ISL_1575479, EPI_ISL_1586897 | see above | Laboratoire Biolim/FSS/UL                                                             | Unité Mixte Internationale TransVIHMI (UMI 233 IRD - U1175 INSERM - Université de Montpellier) IRD (Institut de recherche pour le développement)                      | Abla A. KONOU; Adodo SADJI; Ahidjo AYOUBA; Akoéfi SILIADIN; Alassane OURO-MEDEL; Amivi EHLAN; Améyo DORKENOU; Anoumou DAGNRA; Christelle BUTEL; Délema MABA; Eric DELAPORTE; Issaka Maman; Kokou TEGUENI; Koku AGBODEKA; Laetitia SERRANO; Martine PEETERS; Messanh DOUFFAN; Mireille PRINCE-DAVID; Mounerou SALOU; Sidonie A.M.KAGNISSODE; Sika DOSSIM; Syntyche DEVATCHAGNI; Wembo A. HALATOKO                                                                                                                                                                                                                                                                                                                                                                                                                                                                                                                                                                                                                                              |
| EPI_ISL_912574                                                                                                                                                           |           | Laboratoire Central - American Hospital of Paris                                      | National Reference Center for Viruses of Respiratory Infections, Institut Pasteur, Paris                                                                              | Angela Brisebarre; Camille Capel; Etienne Simon-Lorière; Marion Barbet; Maud Vanpeene; Méline Bizard; Ramirez José-Manuel; Sylvie Behillit; Sylvie van der Werf; Vincent Enouf                                                                                                                                                                                                                                                                                                                                                                                                                                                                                                                                                                                                                                                                                                                                                                                                                                                                |
| EPI_ISL_429793, EPI_ISL_459905                                                                                                                                           |           | Laboratoire National de Sante, Microbiology, Virology                                 | Laboratoire National de Sante, Microbiology, Epidemiology and Microbial Genomics                                                                                      | Anke Wienecke-Baldacchino; Ardasha Latsuzbaia; Catherine Ragimbeau; Guillaume Fournier; Jessica Tapp; Joel Mossong; Tamir Abdelrahman; Trung Nguyen Nguyen                                                                                                                                                                                                                                                                                                                                                                                                                                                                                                                                                                                                                                                                                                                                                                                                                                                                                    |
| EPI_ISL_2157362, EPI_ISL_2157369, EPI_ISL_2157559                                                                                                                        |           | Laboratoire National de Santé Publique - LNPS (HAITI - LNPS)                          | Laboratory of Respiratory Viruses and Measles, Oswaldo Cruz Institute, FIOCRUZ                                                                                        | Alice Sampaio Rocha; Ana Carolina Mendonca; Anna Carolina Paixao; Elisa Cavalcante Pereira; Fernando Motta; Ito Journal; Jaques Boncy; Luciana Appolinario; Marilda Siqueira on behalf of the Fiocruz COVID-19 Genomic Surveillance Network; Paola Resende; Patrick Dely; Renata Serrano Lopes; Taina Venas                                                                                                                                                                                                                                                                                                                                                                                                                                                                                                                                                                                                                                                                                                                                   |
| EPI_ISL_2137843                                                                                                                                                          |           | Laboratoire Professeur Daniel GAHOUMA (LPDG)                                          | Centre de Recherches Médicales de Lambaréné (CERMEL)                                                                                                                  | Bertrand Lell and Ayola Akim Adegnika; Davy Leger Mouangala; Georgelin Nguema Ondo; Guy Stéphane Padzys; Gédéon Prince Manouana; Jean Bernard Lekana-Douki; Joël-Fleury Djoba Siawaya; Ludovic Mewono; Moustapha Nzamba Maloum; Noé Patrick Mbondoukwe; Rodrigue Bikangu; Rodrigue Mints Nguema; Sam O'neilla Oye Bingono; Samira Zoa Assoumou; Sandrine Zeh Nfor; Srinivas reddy Pallerla; Steffen Borrmann; Thirumalaisamy P. Velavan                                                                                                                                                                                                                                                                                                                                                                                                                                                                                                                                                                                                       |
| EPI_ISL_1760554                                                                                                                                                          |           | Laboratoire Professeur Daniel GAHOUMA (LPDG)                                          | Centre de recherches médicales de Lambaréné (CERMEL)                                                                                                                  | Ayola A. Adegnika; Ayong Moure; Bertrand Lell; Bénédicte Ndeboko; Emilio Skarwan; Georgelin Nguema Ondo; Gédéon P. Manouana; Haruka Abe; Jiro Yasuda; Joel Fleury Djoba Siawaya; Rodrigue Bikangu; Rotimi Myrabelle Avome Houechenou; Samira Zoa-Assoumou; Yuri Ushijima                                                                                                                                                                                                                                                                                                                                                                                                                                                                                                                                                                                                                                                                                                                                                                      |
| EPI_ISL_1116465, EPI_ISL_1116470, EPI_ISL_1895101, EPI_ISL_1904295                                                                                                       |           | Laboratoire central de Virologie                                                      | Laboratoire de Biotechnologie                                                                                                                                         | Abdelmunim Essabbar; Amal Zouaki; Ghizlane EL Amin; Hakima Kabbaj; Lahcen Belyamani and Azeddine Ibrahim; Mouna Ouadghiri; Myriam Sefar; Saaid Amzazi; Tarik Aanniz                                                                                                                                                                                                                                                                                                                                                                                                                                                                                                                                                                                                                                                                                                                                                                                                                                                                           |
| EPI_ISL_2178986, EPI_ISL_2227197, EPI_ISL_2227198, EPI_ISL_2227199, EPI_ISL_2227201, EPI_ISL_2227202                                                                     |           | Laboratoire d'analyse biomédicale du camp Ouezzin Coulibaly                           | Centre Muraz                                                                                                                                                          | Abdoul-Salam Ouedraogo; Amarié Koné; Armel Poda; Arsène Zongo; Essia Belarbi; Fabian Leendertz; Grit Schubert; Halidou Tinto; Soumeiya Ouangraoua; Thérèse Kagoné; Yacouba Sawadogo; Zekiba Tamagda                                                                                                                                                                                                                                                                                                                                                                                                                                                                                                                                                                                                                                                                                                                                                                                                                                           |
| EPI_ISL_660446, EPI_ISL_660452, EPI_ISL_660453, EPI_ISL_660473, EPI_ISL_660478, EPI_ISL_660479, EPI_ISL_660527, EPI_ISL_2142707, EPI_ISL_2142713, EPI_ISL_2142720        | see above | Laboratoire de Microbiologie CHU Sourou Sanou                                         | Centre Muraz                                                                                                                                                          | Abdoul-Salam Ouedraogo; Amarié Koné; Armel Poda; Arsène Zongo; Essia Belarbi; Fabian Leendertz; Grit Schubert; Halidou Tinto; Lassana Sangaré; Soumeiya Ouangraoua; Thérèse Kagoné; Yacouba Sawadogo; Zekiba Tamagda                                                                                                                                                                                                                                                                                                                                                                                                                                                                                                                                                                                                                                                                                                                                                                                                                          |
| EPI_ISL_1118923                                                                                                                                                          |           | Laboratoire de Microbiologie- CHU Habib Bourguiba - Sfax                              | Laboratoire des Procédés de Criblage Moléculaire et Cellulaire-Centre de Biotechnologie de Sfax                                                                       | A. and Masmoudi, S.; Abdelmoulah, F.; Abid, N.; Ajili, F.; Aouni, M.; Ben Ayed, I.; Bensaïd, M.; Chtourou, A.; Elargoubi, A.; Fki-berrajah, L.; Gaaloul, I.; Gargouri, S.; Hammami, A.; Kamoun, S.; Karray Hakim, H.; Kharat, N.; Mastouri, M.; Mhalla, S.; Nabil, A.; Rebai, Smeti, I.; Souissi, A.; Stambouli, N.; Turki, M.                                                                                                                                                                                                                                                                                                                                                                                                                                                                                                                                                                                                                                                                                                                |
| EPI_ISL_712068                                                                                                                                                           |           | Laboratoire de Microbiologie- CHU Habib Bourguiba - Sfax adresse                      | Laboratoire des Procédés de Criblage Moléculaire et Cellulaire-Centre de Biotechnologie de Sfax                                                                       | A. and Masmoudi, S.; Abdelmoulah, F.; Abid, N.; Ajili, F.; Aouni, M.; Ben Ayed, I.; Bensaïd, M.; Chtourou, A.; Elargoubi, A.; Fki-berrajah, L.; Gaaloul, I.; Gargouri, S.; Hammami, A.; Kamoun, S.; Karray Hakim, H.; Kharat, N.; Mastouri, M.; Mhalla, S.; Nabil, A.; Rebai, Smeti, I.; Souissi, A.; Stambouli, N.; Turki, M.                                                                                                                                                                                                                                                                                                                                                                                                                                                                                                                                                                                                                                                                                                                |
| EPI_ISL_451400                                                                                                                                                           |           | Laboratoire de Recherche et d'Analyse Médicale de la Gendarmerie Royale               | Laboratoire de Recherche et d'Analyse Médicale de la Gendarmerie Royale                                                                                               | Amal SOUIRI; Sanaâ LEMRISS; Saâd EL KABBAJ                                                                                                                                                                                                                                                                                                                                                                                                                                                                                                                                                                                                                                                                                                                                                                                                                                                                                                                                                                                                    |
| EPI_ISL_933715, EPI_ISL_933719                                                                                                                                           |           | Laboratoire de Recherche et d'Analyses Médicales de la Gendarmerie Royale             | Laboratoire de Recherche et d'Analyses Médicales de la Gendarmerie Royale                                                                                             | Amal Souiri; Mohammed Labioui; Momammed Labioui; Nabil Lemzaoui; S. El kabbaj; Sanaâ Lemriss; Saâd El kabbaj; elmostafa El Fahime                                                                                                                                                                                                                                                                                                                                                                                                                                                                                                                                                                                                                                                                                                                                                                                                                                                                                                             |
| EPI_ISL_1790074                                                                                                                                                          |           | Laboratoire de Référence de la TB Douala                                              | Institut Pasteur de Dakar                                                                                                                                             | Carniel Elisabeth; Dia Ndongo; Diagne Moussa Moïse; Diallo Amadou; Diop Mamadou; Faye Ousmane; Loucoubar Cheikh; Ndiaye Ndack; Njouom Richard; Sall Amadou Alpha; Sankhe Safietou                                                                                                                                                                                                                                                                                                                                                                                                                                                                                                                                                                                                                                                                                                                                                                                                                                                             |
| EPI_ISL_1167302, EPI_ISL_1696768, EPI_ISL_1696776, EPI_ISL_1697223, EPI_ISL_1969095, EPI_ISL_1969110                                                                     |           | Laboratoire de santé publique du Québec                                               | Laboratoire de santé publique du Québec                                                                                                                               | Guillaume Bourque; Ioannis Ragoussis; Jesse Shapiro; Mark Lathrop and Michel Roger on behalf of the CoVSeQ research group; Mark Lathrop and Michel Roger on behalf of the CoVSeQ research group ( <a href="http://covseq.ca/researchgroup/">http://covseq.ca/researchgroup/</a> ); Sandrine Moreira                                                                                                                                                                                                                                                                                                                                                                                                                                                                                                                                                                                                                                                                                                                                           |
| EPI_ISL_1208399                                                                                                                                                          |           | Laboratoire de virologie clinique - Institut Pasteur de Tunis                         | 1-Laboratory of Microbiology, National Reference Lab, Charles Nicolle Hospital; 2-University of Tunis ElManar, Faculty of Medicine of Tunis, LR99ES09, Tunis, Tunisia | Alia BenKahla; Anissa Choukha; Fares Wasfi; Henda Triki; Ilhem Boutiba-Ben Boubaker.; Imen Kacem; Ines Mdini; Jalila Ben Khelil; Maher Kharrat; Manel Ben Sassi; Mariem Gdoura; Mouna Ben Sassi; Mouna Safer; Nissaf Ben Alaya; Riadh Daghtous; Riadh Gouider; Roua Ben Othman; Salma Abid; Sameh Trabelsi; Sana Ferjani; Sara Chammam; Sondes Haddad                                                                                                                                                                                                                                                                                                                                                                                                                                                                                                                                                                                                                                                                                         |
| EPI_ISL_476829                                                                                                                                                           |           | Laboratoire des Fièvres Hémorragiques Virales du Benin                                | Charité-Universitätsmedizin Berlin                                                                                                                                    | Anges; Drexler; Jan Felix; Moreira-Soto Andres; Sander Anna-Lena; Yadouleton                                                                                                                                                                                                                                                                                                                                                                                                                                                                                                                                                                                                                                                                                                                                                                                                                                                                                                                                                                  |
| EPI_ISL_1383333, EPI_ISL_1383523                                                                                                                                         |           | Laboratoire national de sante, Microbiology, Virology                                 | Laboratoire national de sante, Microbiology, Microbial Genomics Platform                                                                                              | Anke Wienecke-Baldacchino; Catherine Ragimbeau; Fatu Djabi; Jessica Tapp; Lise Pignon; Raoul Salmon; Tamir Abdelrahman; Trung Nguyen Nguyen                                                                                                                                                                                                                                                                                                                                                                                                                                                                                                                                                                                                                                                                                                                                                                                                                                                                                                   |
| EPI_ISL_739806, EPI_ISL_740026, EPI_ISL_740027, EPI_ISL_740229, EPI_ISL_740486, EPI_ISL_740489                                                                           |           | Laboratoire national de santé, Microbiology, Virology                                 | Laboratoire national de santé, Microbiology, Microbial Genomics Platform                                                                                              | Anke Wienecke-Baldacchino; Catherine Ragimbeau; Fatu Djabi; Jessica Tapp; Lise Pignon; Raoul Salmon; Tamir Abdelrahman                                                                                                                                                                                                                                                                                                                                                                                                                                                                                                                                                                                                                                                                                                                                                                                                                                                                                                                        |
| EPI_ISL_1917743                                                                                                                                                          |           | Laboratoires d'analyses médicales - Ketterhill                                        | Laboratoire national de sante, Microbiology, Microbial Genomics Platform                                                                                              | Anke Wienecke-Baldacchino; Caroline Scheiber; Catherine Ragimbeau; Fatu Djabi; Jessica Tapp; Lise Pignon; Raoul Salmon; Serge Vedy; Tamir Abdelrahman                                                                                                                                                                                                                                                                                                                                                                                                                                                                                                                                                                                                                                                                                                                                                                                                                                                                                         |
| EPI_ISL_2140534                                                                                                                                                          |           | Laboratori Clínic Territorial de Girona                                               | Can Ruti SARS-CoV-2 Sequencing Hub (HUGTIP/IRSI/CAIXA/IGTP)                                                                                                           | Alba Sánchez; Anna Not; Antoni E Bordoy; Bonaventura Clotet; Cristina Casañ; Cristina Esteban; Francesc Catala-Moll; Gemma Clara; Ignacio Blanco; Marc Noguera-Julian; Maria Casadellà; Mariona Pareja; Mercedes Guerrero; Montserrat Giménez; Pere-Joan Cardona; Pilar Armengol; Roger Paredes; Verónica Saludes; and Elisa Martró on behalf of the Can Ruti SARS-CoV-2 Sequencing Hub.                                                                                                                                                                                                                                                                                                                                                                                                                                                                                                                                                                                                                                                      |
| EPI_ISL_2156058                                                                                                                                                          |           | Laboratorio Aziendale di Microbiologia e Virologia, Azienda Sanitaria dell'Alto Adige | Laboratorio Aziendale di Microbiologia e Virologia, Azienda Sanitaria dell'Alto Adige                                                                                 | Anne Picard; Bartolomeo Mobilio Rodriguez; Chiara Cantaloni; Claudia Volpato; Elisa Masi; Elisabetta Giacobazzi; Elisabetta Pagani; Irene Bianconi; Stefanie Wieser                                                                                                                                                                                                                                                                                                                                                                                                                                                                                                                                                                                                                                                                                                                                                                                                                                                                           |
| EPI_ISL_1858428, EPI_ISL_1858660, EPI_ISL_2101389                                                                                                                        |           | Laboratorio Central Noel Nutels                                                       | Bioinformatics Laboratory / LNCC                                                                                                                                      | Alessandra P Lamarca; Alexandra L Gerber; Amilcar Tanuri; Ana Paula de C Guimarães; Ana Paula de C Guimarães; Ana Tereza R Vasconcelos; Andrea Cony Cavalcanti; Andréa Cony Cavalcanti; Caio Luiz Pereira Ribeiro; Cassia Alves; Cintia Policarpo; Cláudia Maria Braga de Mello; Cristiane Gomes da Silva; Diana Mariani; Douglas Terra Machado; Flavio Dias da Silva; Flávio Dias da Silva; Gleidson da Silva de Oliveira; Leandro Magalhães de Souza; Leandro Magalhães de Souza; Liliane Cavalcante; Luiz G P de Almeida; Marcio Henrique de Oliveira Garcia; Mario Sergio Ribeiro; Ronaldo da Silva F Jr; Sílvia Carvalho; Thais Felix Cruz                                                                                                                                                                                                                                                                                                                                                                                               |
| EPI_ISL_1661978                                                                                                                                                          |           | Laboratório Central de Epidemiologia (LCE)                                            | Unidad de Genómica Avanzada                                                                                                                                           | Alejandro Sanchez-Flores; Alfredo Herrera-Estrella; Alicia Ocana-Mondragon; Angel Gustavo Salas-Lais; Bernardo Martinez-Miguel; Blanca Taboada; Brenda Irasema Maldonado-Meza; Carla Ivon Herrera-Najera; Carlos F. Arias; Celia Boukadida; Celida Duque Molina; Clara Esperanza Santacruz-Tinoco; Concepcion Grajales-Muniz; Consorcio Mexicano de Vigilancia Genómica (CoVIGen-Mex). Authors (in alphabetical order): Julio Elias Alvarado-Yaah; Fernando Fontove-Herrera; Francisco Pulido; Gloria Elena Espinosa-Ayala; Gloria Maria Molina-Salinas; Gloria Vazquez; Hector Esteban Paz-Juarez; Hector Montoya-Fuentes; Helen Haydee Fernandez-Plascencia; Jose Antonio Enciso-Moreno; Jose Esteban Munoz-Medina; Jose de Jesus Nunez-Contreras; Juan Bautista Chale-Dzul; Luis Alberto Ochoa-Carrera; Margarita Matias-Florentino; Maria Guadalupe Santiago-Mauricio; Maria Guadalupe de Jesus Mireles-Rivera; Nelly Selem-Mojica; Pavel Isa; Ricardo Grande; Santiago Ávila-Rios; Victor Eduardo Garcia-Arias; Victor Hugo Borja-Aburto |
| EPI_ISL_1351883, EPI_ISL_1351902, EPI_ISL_1351990                                                                                                                        |           | Laboratorio Central de Epidemiología-a (LCE)                                          | Unidad de Genómica Avanzada                                                                                                                                           | Alejandro Sanchez-Flores; Alfredo Herrera-Estrella; Alicia Ocana-Mondragon; Angel Gustavo Salas-Lais; Bernardo Martinez-Miguel; Blanca Taboada; Brenda Irasema Maldonado-Meza; Carla Ivon Herrera-Najera; Carlos F. Arias; Celia Boukadida; Clara Esperanza Santacruz-Tinoco; Concepcion Grajales-Muniz; Consorcio Mexicano de Vigilancia Genómica (CoVIGen-Mex). Authors (in alphabetical order): Julio Elias Alvarado-Yaah; Fernando                                                                                                                                                                                                                                                                                                                                                                                                                                                                                                                                                                                                        |

|                                                                                                                                                                                                                                                                                |                                                                                |                                                                                                                                                                                                     |                                                                                                                                                                                                                                                                                                                                                                                                                                                                                                                                                                                                                                                                                                                                                                                                                                                                                                                                                                                                                                                                                   |
|--------------------------------------------------------------------------------------------------------------------------------------------------------------------------------------------------------------------------------------------------------------------------------|--------------------------------------------------------------------------------|-----------------------------------------------------------------------------------------------------------------------------------------------------------------------------------------------------|-----------------------------------------------------------------------------------------------------------------------------------------------------------------------------------------------------------------------------------------------------------------------------------------------------------------------------------------------------------------------------------------------------------------------------------------------------------------------------------------------------------------------------------------------------------------------------------------------------------------------------------------------------------------------------------------------------------------------------------------------------------------------------------------------------------------------------------------------------------------------------------------------------------------------------------------------------------------------------------------------------------------------------------------------------------------------------------|
| EPI_ISL_2091333, EPI_ISL_2091379, EPI_ISL_2091434                                                                                                                                                                                                                              | Laboratorio Central de Epidemiología (LCE)                                     | Centro de Investigación en Enfermedades Infecciosas (CIENI), Instituto Nacional de Enfermedades Respiratorias (INER)                                                                                | Fontove-Herrera; Francisco Pulido; Gloria Elena Espinosa-Ayala; Gloria María Molina-Salinas; Gloria Vazquez; Hector Esteban Paz-Juarez; Hector Montoya-Fuentes; Helen Haydee Fernanda Ramirez-Plascencia; Jorge Ivan Salinal-Navarez; Jose Antonio Enciso-Moreno; Jose Esteban Munoz-Medina; Jose de Jesus Nunez-Contreras; Juan Bautista Chale-Dzul; Luis Alberto Ochoa-Carrera; Margarita Matias-Florentino; Maria Guadalupe Santiago-Mauricio; Maria Guadalupe de Jesus Mireles-Rivera; Nelly Selem-Mojica; Pavel Isa; Ricardo Grande; Santiago Avila-Rios; Victor Hugo Borja-Aburto                                                                                                                                                                                                                                                                                                                                                                                                                                                                                           |
| EPI_ISL_1279571, EPI_ISL_1279586, EPI_ISL_1279589, EPI_ISL_1287775, EPI_ISL_1585584, EPI_ISL_1585587, EPI_ISL_1585618, EPI_ISL_1585666                                                                                                                                         | see above                                                                      | Laboratorio Central de Epidemiología (LCE)                                                                                                                                                          | Instituto Nacional de Enfermedades Respiratorias (INER); Centro de Investigación en Enfermedades Infecciosas (CIENI)                                                                                                                                                                                                                                                                                                                                                                                                                                                                                                                                                                                                                                                                                                                                                                                                                                                                                                                                                              |
| EPI_ISL_1288204, EPI_ISL_1288250, EPI_ISL_1288326, EPI_ISL_1288423, EPI_ISL_1288425, EPI_ISL_1288497, EPI_ISL_1416362, EPI_ISL_1416441, EPI_ISL_1416534, EPI_ISL_1416537, EPI_ISL_1811391, EPI_ISL_1811432, EPI_ISL_1811460, EPI_ISL_1811463, EPI_ISL_1811465, EPI_ISL_1811473 | see above                                                                      | Laboratorio Central de Epidemiología (LCE)                                                                                                                                                          | Instituto de Biotecnología de la UNAM                                                                                                                                                                                                                                                                                                                                                                                                                                                                                                                                                                                                                                                                                                                                                                                                                                                                                                                                                                                                                                             |
| EPI_ISL_1301446, EPI_ISL_1301466, EPI_ISL_1301624, EPI_ISL_1301678, EPI_ISL_1302173, EPI_ISL_1302264                                                                                                                                                                           | Laboratorio Central de Epidemiología IMSS                                      | Instituto de Biotecnología de la UNAM                                                                                                                                                               | Alejandro Sanchez-Flores; Alfredo Herrera-Estrella; Alicia Ocaña-Mondragón; Angel Gustavo Salas-Lais; Bernardo Martínez-Miguel; Blanca Taboada; Brenda Irasema Maldonado-Meza; Carla Ivón Herrera-Najera; Carlos F. Arias; Celia Boukadida; Clara Esperanza Santacruz-Tinoco; Concepción Grajales-Muñiz; Consorcio Mexicano de Vigilancia Genómica (CoViGen-Mex). Authors (in alphabetical order): Julio Elias Alvarado-Yaah; Cécilia Duque Molina; Fernando Fontove-Herrera; Francisco Pulido; Gloria Elena Espinosa-Ayala; Gloria María Molina-Salinas; Gloria Vazquez; Hector Esteban Paz-Juárez; Hector Montoya-Fuentes; Helen Haydee Fernanda Ramirez-Plascencia; Jorge Ivan Salinal-Navarez; José Antonio Enciso-Moreno; José Esteban Muñoz-Medina; José de Jesús Nuñez-Contreras; Juan Bautista Chale-Dzul; Luis Alberto Ochoa-Carrera; Margarita Matias-Florentino; Maria Guadalupe Santiago-Mauricio; Maria Guadalupe de Jesus Mireles-Rivera; Nelly Selem-Mojica; Pavel Isa; Ricardo Grande; Santiago Avila-Rios; Victor Eduardo Garcia-Arias; Victor Hugo Borja-Aburto |
| EPI_ISL_1492637, EPI_ISL_1492642, EPI_ISL_1492644, EPI_ISL_1492651, EPI_ISL_1492654, EPI_ISL_1492655, EPI_ISL_1492657, EPI_ISL_1492666, EPI_ISL_1492667, EPI_ISL_1492673, EPI_ISL_1492674, EPI_ISL_1492678                                                                     | see above                                                                      | Laboratorio Central de Salud Publica de Paraguay                                                                                                                                                    | Laboratorio Central de Salud Publica de Paraguay                                                                                                                                                                                                                                                                                                                                                                                                                                                                                                                                                                                                                                                                                                                                                                                                                                                                                                                                                                                                                                  |
| EPI_ISL_1395939, EPI_ISL_1395945                                                                                                                                                                                                                                               | Laboratorio Central de Salud Pública                                           | Grupo de Genómica y Bioinformática del Instituto de Investigación de la Cadena Láctea CONICET-INTA on behalf of 'Proyecto Argentino Interinstitucional de genómica de SARS-CoV-2' (PAIS Consortium) | AF; Amadio; Antonieta Cayré; Eberhardt; Erica Struss; Esteban Paredes; Irazoqui; Laura Lescano; MF; Natalia Andrea Ayala y María Verónica Gómez                                                                                                                                                                                                                                                                                                                                                                                                                                                                                                                                                                                                                                                                                                                                                                                                                                                                                                                                   |
| EPI_ISL_2157519                                                                                                                                                                                                                                                                | Laboratorio Central de Saude Publica do Esatado de Alagoas (LACEN/AL)          | Laboratory of Respiratory Viruses and Measles, Oswaldo Cruz Institute, FIOCRUZ                                                                                                                      | Alice Sampaio Rocha; Ana Carolina Mendonca; Anderson Brandao Leite; Anna Carolina Paixao; Elisa Cavalcante Pereira; Fernando Motta; Luciana Appolinario; Marilda Siqueira on behalf of the Fiocruz COVID-19 Genomic Surveillance Network; Paola Resende; Renata Serrano Lopes; Taina Venas                                                                                                                                                                                                                                                                                                                                                                                                                                                                                                                                                                                                                                                                                                                                                                                        |
| EPI_ISL_1533992                                                                                                                                                                                                                                                                | Laboratorio Central de Saude Publica do Estado de Santa Catarina (LACEN-SC)    | Laboratory of Respiratory Viruses and Measles, Oswaldo Cruz Institute, FIOCRUZ                                                                                                                      | Alice Sampaio Rocha; Ana Carolina Mendonca; Anna Carolina Paixao; Darcita Buerger Rovaris; Fernando Motta; Luciana Appolinario; Marilda Siqueira on behalf of the Fiocruz COVID-19 Genomic Surveillance Network; Paola Resende; Renata Serrano Lopes; Sandra Bianchini Fernandes                                                                                                                                                                                                                                                                                                                                                                                                                                                                                                                                                                                                                                                                                                                                                                                                  |
| EPI_ISL_2196214                                                                                                                                                                                                                                                                | Laboratorio Central de Saude Publica do Estado de Sergipe (LACEN/SE)           | Laboratory of Respiratory Viruses and Measles, Oswaldo Cruz Institute, FIOCRUZ                                                                                                                      | Alice Sampaio Rocha; Ana Carolina Mendonca; Anna Carolina Paixao; Cliomar Alves dos Santos; Elisa Cavalcante Pereira; Fernando Motta; Luciana Appolinario; Marilda Siqueira on behalf of the Fiocruz COVID-19 Genomic Surveillance Network; Paola Resende; Renata Serrano Lopes; Tainá Moreira Martins Venas                                                                                                                                                                                                                                                                                                                                                                                                                                                                                                                                                                                                                                                                                                                                                                      |
| EPI_ISL_2038959                                                                                                                                                                                                                                                                | Laboratorio Central de Saude Publica do Estado do Rio Grande do Sul (LACEN-RS) | Laboratory of Respiratory Viruses and Measles, Oswaldo Cruz Institute, FIOCRUZ                                                                                                                      | Alice Sampaio Rocha; Ana Carolina Mendonca; Anna Carolina Paixao; Elisa Cavalcante Pereira; Fernando Motta; Luciana Appolinario; Marilda Siqueira on behalf of the Fiocruz COVID-19 Genomic Surveillance Network; Paola Resende; Renata Serrano Lopes; Richard Salvato; Taina Venas; Tatiana Schaffer Gregianini                                                                                                                                                                                                                                                                                                                                                                                                                                                                                                                                                                                                                                                                                                                                                                  |
| EPI_ISL_1395902, EPI_ISL_1395928                                                                                                                                                                                                                                               | Laboratorio Central de la Ciudad de Santa Fe                                   | Grupo de Genómica y Bioinformática del Instituto de Investigación de la Cadena Láctea CONICET-INTA on behalf of 'Proyecto Argentino Interinstitucional de genómica de SARS-CoV-2' (PAIS Consortium) | AF; Amadio; C; Eberhardt; G; Irazoqui; JM; MF; Mugna; Ojeda; Pastor; Rompató; V                                                                                                                                                                                                                                                                                                                                                                                                                                                                                                                                                                                                                                                                                                                                                                                                                                                                                                                                                                                                   |
| EPI_ISL_792540, EPI_ISL_2007503, EPI_ISL_2007563, EPI_ISL_2007566, EPI_ISL_2007571                                                                                                                                                                                             | Laboratorio Central, Ministerio de Salud Córdoba                               | Instituto de Patología Vegetal (CIAP-INTA) on behalf of 'Proyecto Argentino Interinstitucional de genómica de SARS-CoV-2' (PAIS Consortium)                                                         | A; Amadio; Barbas, G.; Castro, G.; Debat, H.J.; FD; Fernández; Irazoqui; M; M.B.; MB; Marquez, N.; Pisano; Re, Re, V.; V                                                                                                                                                                                                                                                                                                                                                                                                                                                                                                                                                                                                                                                                                                                                                                                                                                                                                                                                                          |
| EPI_ISL_2102649                                                                                                                                                                                                                                                                | Laboratorio Estatal de Salud Publica de Nuevo Leon                             | Laboratorio Estatal de Salud Publica de Nuevo Leon                                                                                                                                                  | (in alphabetical order) Consuelo Treviño-Garza; Eduardo Isaac de la Rosa-Moreno; Else del Carmen Garcia-García; Gloria Alejandra Jasso-de la Peña; Manuel Enrique de la O-Cavazos; Olín Medina-Chávez; Yulianna Mayre Cordeiro-Cruz                                                                                                                                                                                                                                                                                                                                                                                                                                                                                                                                                                                                                                                                                                                                                                                                                                               |
| EPI_ISL_424667                                                                                                                                                                                                                                                                 | Laboratorio Estatal de Salud Publica del Estado de México                      | Instituto de Diagnóstico y Referencia Epidemiológicos                                                                                                                                               | Adnan Araiza Rodríguez; Alejandro Sánchez; Alfredo Ponce de León Garduño; Blanca Taboada; Carlos F. Arias.; Carolina González Torres; Celia Boukadida; Cesar Raúl González Bonilla; Concepción Grajales Muñiz; Edgar Mendieta Condado; Eduardo Becerril Vargas; Fabiola Garcés Ayala; Fernando Ledesma Barrientos; Francisco Javier Gaytán Cervantes; Francisco Pulido; Gisela Barrera Badillo; Gloria Vázquez; Guillermo M. Ruiz-Palacios; Irma López Martínez; Joel Armando Vázquez Pérez; José Arturo Martínez Orozco; José Ernesto Ramírez González; José Esteban Muñoz Medina; Lucia Hernández Rivas; Luis Alberto García Andrade; Mario Mújica Sánchez; Pavel Isa; Pilar Ramos Cervantes; Ricardo Grande; Santiago Avila Rios; Victor Hugo Borja Aburto; Violeta Ibarra Gonzalez                                                                                                                                                                                                                                                                                            |
| EPI_ISL_1091257                                                                                                                                                                                                                                                                | Laboratorio Estatal de Salud Pública de Nuevo León                             | Laboratorio de Infectología Molecular, Departamento de Bioquímica y Medicina Molecular, Facultad de Medicina - Universidad Autónoma de Nuevo León                                                   | Ana M. Rivas-Estilla; Consuelo Treviño-Garza; Daniel Arellanos-Soto; Else del Carmen García-García; Gloria A. Jasso-de-la-Peña; Kame A. Galán-Huerta; Manuel E. de-la-O-Cavazos; María F. Herrera-Saldívar; Natalia Martínez-Acuña; Roberto Montes-de-Oca; Samuel Buentello-Wong; Sonia A. Lozano-Sepúlveda                                                                                                                                                                                                                                                                                                                                                                                                                                                                                                                                                                                                                                                                                                                                                                       |
| EPI_ISL_2139516                                                                                                                                                                                                                                                                | Laboratorio Exame                                                              | Universidade Federal de Ciencias da Saude de Porto Alegre                                                                                                                                           | Gabriel Dickin Caldana et al.; Vinicius Bonetti Franceschi                                                                                                                                                                                                                                                                                                                                                                                                                                                                                                                                                                                                                                                                                                                                                                                                                                                                                                                                                                                                                        |
| EPI_ISL_956306                                                                                                                                                                                                                                                                 | Laboratorio Gencore- Universidad de los Andes                                  | Instituto Nacional de Salud- Dirección de Investigación en Salud Pública, Universidad de los Andes- Gencore                                                                                         | Carlos Franco-Muñoz; Diego A. Álvarez-Díaz; Diego Andrés Prada; Gerardo Santamaría; Hector Alejandro Ruiz-Moreno; Jhonnatan Reales-González; Julian Naizaque; Katherine Laiton-Donato; Magdalena Wiesner; Marcela Mercado-Reyes; María T. Herrera-Sepúlveda; Martha Lucia Ospina Martinez; Mauricio Pacheco-Montealegre; Sheryll Corchuelo                                                                                                                                                                                                                                                                                                                                                                                                                                                                                                                                                                                                                                                                                                                                        |
| EPI_ISL_837581                                                                                                                                                                                                                                                                 | Laboratorio Nacional de Salud                                                  | Laboratory of Respiratory Viruses and Measles, Oswaldo Cruz                                                                                                                                         | Ana Carolina Mendonca; Anna Carolina Paixao; Cesar Roberto Conde Pereira; Claudia Estrada; Fernando Motta; Luciana Appolinario; Marilda Siqueira on                                                                                                                                                                                                                                                                                                                                                                                                                                                                                                                                                                                                                                                                                                                                                                                                                                                                                                                               |

|                                                                                                                                                                                           |                                                                                                                    |                                                                                                                                                                                                                                                                |                                                                                                                                                                                                                                                                                                                                                                                                                                                                                                                                                                                                                                                                                                                                                     |
|-------------------------------------------------------------------------------------------------------------------------------------------------------------------------------------------|--------------------------------------------------------------------------------------------------------------------|----------------------------------------------------------------------------------------------------------------------------------------------------------------------------------------------------------------------------------------------------------------|-----------------------------------------------------------------------------------------------------------------------------------------------------------------------------------------------------------------------------------------------------------------------------------------------------------------------------------------------------------------------------------------------------------------------------------------------------------------------------------------------------------------------------------------------------------------------------------------------------------------------------------------------------------------------------------------------------------------------------------------------------|
| EPI_ISL_1278278                                                                                                                                                                           | Laboratorio de Biología Molecular, Hospital San Pedro Claver                                                       | Institute, FIOCRUZ<br>Molecular Genetics Laboratory, Instituto de Investigaciones Químicas, Universidad Mayor de San Andrés                                                                                                                                    | behalf of the Fiocruz COVID-19 Genomic Surveillance Network; Paola Resende<br>Aneth Vasquez Michel; Carmen Delgado Barrera; Oscar M. Rollano-Peñalozza                                                                                                                                                                                                                                                                                                                                                                                                                                                                                                                                                                                              |
| EPI_ISL_1278282, EPI_ISL_1278283, EPI_ISL_1278284                                                                                                                                         | Laboratorio de Biología Molecular, SEDES-Potosi                                                                    | Molecular Genetics Laboratory, Instituto de Investigaciones Químicas, Universidad Mayor de San Andrés                                                                                                                                                          | Aneth Vasquez Michel; Oscar M. Rollano-Peñalozza                                                                                                                                                                                                                                                                                                                                                                                                                                                                                                                                                                                                                                                                                                    |
| EPI_ISL_480437                                                                                                                                                                            | Laboratorio de Biología Molecular Asociación Española Primera en Salud                                             | Departments of Pathology and Medicine, New York University School of Medicine                                                                                                                                                                                  | Adriana Heguy; Christian Marier; Gael Westby; Gonzalo Manrique; Maria Noel Zubillaga; Maria Victoria Elizondo; Matthew T Mauroano; Paul Zappile                                                                                                                                                                                                                                                                                                                                                                                                                                                                                                                                                                                                     |
| EPI_ISL_1582989                                                                                                                                                                           | Laboratorio de Biología Molecular - Universidad del Magdalena                                                      | Instituto Nacional de Salud- Dirección de Investigación en Salud Pública                                                                                                                                                                                       | Carlos Franco-Muñoz; Carmen Osorio; Diana Malo; Diego A. Álvarez-Díaz; Diego Andrés Prada; Gerardo Santamaría; Hector Alejandro Ruiz-Moreno; Jhonnatan Reales-González; Juan Camilo Martínez; Julian Naizaque; Katherine Laiton-Donato; Lisseth Pardo; Magdalena Wiesner; Marcela Mercado-Reyes; María T. Herrera-Sepulveda; Marta Lopez Blanco; Martha Lucia Ospina Martínez; Paola Rojas; Sergio Gomez; Sheryll Corchuelo; Ángela Alarcon Cruz                                                                                                                                                                                                                                                                                                    |
| EPI_ISL_1068151                                                                                                                                                                           | Laboratorio de Ecología de Doenças Transmissíveis na Amazonia, Instituto Leonidas e Maria Deane - Fiocruz Amazonia | Laboratorio de Ecología de Doenças Transmissíveis na Amazonia, Instituto Leonidas e Maria Deane - Fiocruz Amazonia                                                                                                                                             | André Corado; Debora Duarte; Felipe Naveca on behalf of the Fiocruz COVID-19 Genomic Surveillance Network; Fernanda Nascimento; George Silva; Karina Pessoa; Luciana Gonçalves; Maria Julia Brandão; Matilde Mejía; Michele Jesus; Valdinete Nascimento; Victor Souza; Ágatha Costa                                                                                                                                                                                                                                                                                                                                                                                                                                                                 |
| EPI_ISL_953419, EPI_ISL_953420                                                                                                                                                            | Laboratorio de Investigaciones de Baney                                                                            | "Swiss Tropical and Public Health Institute"                                                                                                                                                                                                                   | "Carlos Cortes; Bonifacio Manguire Nlavo; Claudia Daubenberger; Diosdado Odjama Nseng Ada; Elizabeth Nyakarungu; Guillermo Garcia; Maximilian Mpina; Mitoha Ondo O Ayekaba; Philip Wonder Phiri"; Salome Hosch; Tobias Schindler                                                                                                                                                                                                                                                                                                                                                                                                                                                                                                                    |
| EPI_ISL_1673319, EPI_ISL_1673330, EPI_ISL_1700675, EPI_ISL_1700681, EPI_ISL_1700683, EPI_ISL_1700684, EPI_ISL_1700686, EPI_ISL_1700687, EPI_ISL_2002670, EPI_ISL_2002683, EPI_ISL_2002688 | see above                                                                                                          | Laboratorio de Investigaciones de Baney                                                                                                                                                                                                                        | Swiss Tropical and Public Health Institute                                                                                                                                                                                                                                                                                                                                                                                                                                                                                                                                                                                                                                                                                                          |
| EPI_ISL_648357                                                                                                                                                                            | Laboratorio de Investigaciones de Baney                                                                            | University Hospital Basel, Clinical Bacteriology                                                                                                                                                                                                               | Adrian Egli; Alfredo Mari; Bonifacio Manguire Nlavo; Carlos Cortes; Claudia Daubenberger; Diosdado Odjama Nseng Ada; Elizabeth Nyakarungu; Guillermo Garcia; Helena Seth-Smith; Madlen Stange; Maximilian Mpina; Mitoha Ondo O Ayekaba; Philip Wonder Phiri; Salome Hosch; Tim Roloff; Tobias Schindler                                                                                                                                                                                                                                                                                                                                                                                                                                             |
| EPI_ISL_1111419                                                                                                                                                                           | Laboratorio de Referencia Nacional de Enteropatógenos. Instituto Nacional de Salud del Perú                        | Laboratorio de Referencia Nacional de Enteropatógenos. Instituto Nacional de Salud del Perú                                                                                                                                                                    | Florella Orellana Peralta; Iris Silva Molina; Junior Caro Castro; Ronnie Gavilan Chavez; Veronica Hurtado Vela; Willi Quino Sifuentes                                                                                                                                                                                                                                                                                                                                                                                                                                                                                                                                                                                                               |
| EPI_ISL_489836, EPI_ISL_514317, EPI_ISL_943570, EPI_ISL_1092344, EPI_ISL_1093149, EPI_ISL_1093163, EPI_ISL_1532166, EPI_ISL_1532167, EPI_ISL_1534629, EPI_ISL_1664260                     | see above                                                                                                          | Laboratorio de Referencia Nacional de Virus Respiratorio. Instituto Nacional de Salud Perú                                                                                                                                                                     | Laboratorio de Referencia Nacional de Biotecnología y Biología Molecular. Instituto Nacional de Salud Perú                                                                                                                                                                                                                                                                                                                                                                                                                                                                                                                                                                                                                                          |
| EPI_ISL_1111084, EPI_ISL_1111205, EPI_ISL_1111265, EPI_ISL_1111377, EPI_ISL_1111447, EPI_ISL_1111450, EPI_ISL_1111455                                                                     | see above                                                                                                          | Laboratorio de Referencia Nacional de Virus Respiratorio. Instituto Nacional de Salud Perú                                                                                                                                                                     | Laboratorio de Referencia Nacional de Biotecnología y Biología Molecular. Instituto Nacional de Salud. Perú                                                                                                                                                                                                                                                                                                                                                                                                                                                                                                                                                                                                                                         |
| EPI_ISL_491432                                                                                                                                                                            | Laboratorio de Referencia Nacional de Virus Respiratorio. Instituto Nacional de Salud. Perú                        | Laboratorio de Referencia Nacional de Biotecnología y Biología Molecular. Instituto Nacional de Salud. Perú                                                                                                                                                    | Carlos Padilla Rojas; Henri Bailon Calderon; Johanna Balbuena Torres; Karolyn Vega Chozo; Marco Galarza Perez; Maribel Huaranga Nuñez; Nancy Rojas Serrano.; Omar Caceres Rey; Priscila Lope Pari                                                                                                                                                                                                                                                                                                                                                                                                                                                                                                                                                   |
| EPI_ISL_540926, EPI_ISL_540933, EPI_ISL_540940, EPI_ISL_540984, EPI_ISL_568539, EPI_ISL_812492, EPI_ISL_1629787, EPI_ISL_1629790, EPI_ISL_1629808                                         | see above                                                                                                          | Laboratorio de Referencia Nacional de Virus Respiratorios. Instituto Nacional de Salud Peru                                                                                                                                                                    | Laboratorio de Genómica Microbiana. Universidad Peruana Cayetano Heredia                                                                                                                                                                                                                                                                                                                                                                                                                                                                                                                                                                                                                                                                            |
| EPI_ISL_1235686                                                                                                                                                                           | Laboratorio de Salud Pública (Bogota)                                                                              | Gencore- Universidad de los Andes                                                                                                                                                                                                                              | Alejandro Gómez; David González; Johana Hernandez Gabriela Delgado; Luisa Sacristán; Marcela Guevara-Suarez; Silvia Restrepo                                                                                                                                                                                                                                                                                                                                                                                                                                                                                                                                                                                                                        |
| EPI_ISL_1626618, EPI_ISL_1738789                                                                                                                                                          | Laboratorio de Salud Pública Bogota                                                                                | Gencore - Universidad de los Andes                                                                                                                                                                                                                             | Alejandro Gomez; Ana María Palacio; David Gonzalez; Gabriela Delgado; Johana Hernandez; Luisa Sacristan; Marcela Guevara; Silvia Restrepo                                                                                                                                                                                                                                                                                                                                                                                                                                                                                                                                                                                                           |
| EPI_ISL_470621, EPI_ISL_717872                                                                                                                                                            | Laboratorio de Virologia Molecular / UFRJ                                                                          | Bioinformatics Laboratory / LNCC                                                                                                                                                                                                                               | Alexandra Gerber; Alexandra L Gerber; Amílcar Tanuri; Ana Paula Guimarães; Ana Paula de C Guimarães; Ana Tereza R de Vasconcelos; Andréa Cony Cavalcanti; CADDE-group; Carolina M Voloch; Carolina Voloch; Claudia dos Santos Rodrigues; Cynthia C Cardoso; Diana Mariani; Ester Cerdeira Sabino; Filipe Romero; Ingra Morales Claro; Jaqueline Goes de Jesus; Laboratorio Hermes Pardini; Laboratorio Simile; Luiz G P de Almeida; Luiz Gonzaga Paula de Almeida; Mariane Talon; Nuno Rodrigues Faria; Otavio Bustrolini; Renato Santana Aguiar e Ana Tereza Vasconcelos; Ronaldo da Silva F Jr; Ronaldo da Silva Francisco Junior; Terezinha M P P Castañeira; Terezinha Marta Pereira; working group UFMG; working group UFRJ; Átlla Duque Rossi |
| EPI_ISL_792400, EPI_ISL_1396285                                                                                                                                                           | Laboratorio de Virología del Hospital de Niños Dr. Ricardo Gutierrez                                               | Biocódices SA. on behalf of 'Proyecto Argentino Interinstitucional de genómica de SARS-CoV-2' (PAIS Consortium)                                                                                                                                                | A; Acevedo; Alexay; Alvarez Lopez; Barreda Frank; Berros; Berros JM; C; Dopazo H; Dopazo, H.; E; G; Grandis; Gravis; J; JM; Jacques; Labarta; M; ME; Medina; Mistchenko; N; O; S; Streitenberger; Thomas; Villegas; Zubrzycki J                                                                                                                                                                                                                                                                                                                                                                                                                                                                                                                     |
| EPI_ISL_430810, EPI_ISL_792122, EPI_ISL_1395779, EPI_ISL_1395805, EPI_ISL_2007509, EPI_ISL_2007546                                                                                        | Laboratorio de Virología del Hospital de Niños Dr. Ricardo Gutierrez                                               | Área de Secuenciación del Laboratorio de Virología del Hospital de Niños Dr. Ricardo Gutierrez on behalf of 'Proyecto Argentino Interinstitucional de genómica de SARS-CoV-2' (PAIS Consortium)                                                                | A; AS; Acevedo; Acuña; Alexay; Alvarez Lopez; Barreda Frank; C; D; E; G; Goya; Grandis; Gravis; Jacques; LE; Labarta; Lusso; M; ME; MI; MS; Medina; Mistchenko; N; Nabaes Jodar; Natale; O; S; Streitenberger; Thomas; Valinotto; Viegas, M.; Villegas                                                                                                                                                                                                                                                                                                                                                                                                                                                                                              |
| EPI_ISL_1396123                                                                                                                                                                           | Laboratorio de Virus Respiratorios y Neurovirosis. Hospital Señor del Milagro                                      | Instituto de Patología Vegetal (CIAP-INTA) on behalf of 'Proyecto Argentino Interinstitucional de genómica de SARS-CoV-2' (PAIS Consortium)                                                                                                                    | A. Dra. Raskovsky Viviana; Amadio; Debat, HJ.; Dr. Lavaque Esteban; Dra. Veronica Lesser. Tecnica: Pamela Cajal; FD; Fernanda Agüero.; Fernández; Irazoqui, M.; Marquez, N.                                                                                                                                                                                                                                                                                                                                                                                                                                                                                                                                                                         |
| EPI_ISL_1396144                                                                                                                                                                           | Laboratorio de la Dirección de Epidemiología                                                                       | Área de Secuenciación del Laboratorio de Virología del Hospital de Niños Dr. Ricardo Gutierrez on behalf of 'Proyecto Argentino Interinstitucional de genómica de SARS-CoV-2' (PAIS Consortium)                                                                | AG; Acuña; Alexay; Bertone; C; D; Goya; JC; LE; Lusso; M; MI; Nabaes Jodar; Natale; Rechimont; S; Usero; Valinotto; Viegas, M.; Villasana                                                                                                                                                                                                                                                                                                                                                                                                                                                                                                                                                                                                           |
| EPI_ISL_1396359                                                                                                                                                                           | Laboratorio del Hospital Regional Ushuaia Gdor. Ernesto Campos                                                     | Nodo de Secuenciación Tierra del Fuego - Hospital Regional Ushuaia - Centro Austral De Investigaciones Cientificas - Universidad Nacional De Tierra Del Fuego on behalf of 'Proyecto Argentino Interinstitucional de genómica de SARS-CoV-2' (PAIS Consortium) | Alejandro Ezequiel Rojas; Carina Andrea De Roccis; Carolina Beatriz Yulan; Cristina Fernanda Nardi; Fernando Gallego; Gabriel Alejandro Castro; Ivan Darío Gramundi; Manuel Fabian Boutureira; Santiago Guillermo Ceballos; Silvana Beatriz Cáceres                                                                                                                                                                                                                                                                                                                                                                                                                                                                                                 |
| EPI_ISL_1395807                                                                                                                                                                           | Laboratorio del Hospital Teresa Germani                                                                            | Área de Secuenciación del Laboratorio de Virología del Hospital de Niños Dr. Ricardo Gutierrez on behalf of 'Proyecto Argentino Interinstitucional de genómica de SARS-CoV-2' (PAIS Consortium)                                                                | Acuña; Alexay; Anabel Luzio; D; Gisela Sauco; Goya; LE; Lusso; M; MI; Mauricio Spacavento; Nabaes Jodar; Natale; S; Valinotto; Viegas, M.                                                                                                                                                                                                                                                                                                                                                                                                                                                                                                                                                                                                           |
| EPI_ISL_961466, EPI_ISL_1334384                                                                                                                                                           | Laboratorios Lister                                                                                                | Instituto de Diagnostico y Referencia Epidemiologicos (INDRE)                                                                                                                                                                                                  | Abril Rodriguez-Maldonado; Ariadna Medina-Benitez; Claudia Wong-Arambula; Ernesto Ramirez-Gonzalez.; Fabiola Garces-Ayala; Gisela Barrera-Badillo; Irma Lopez-Martinez; Joaquín Quiroz-Mercado; Lucia Hernandez-Rivas; Navidad Cruz-Ortiz; Sergio Rangel-Guerrero; Tatiana Nunez-Garcia; Vanessa Rivero-Arredondo                                                                                                                                                                                                                                                                                                                                                                                                                                   |
| EPI_ISL_2246899                                                                                                                                                                           | Laboratorium Diagnostyczne Centrum Medycznego Luxmed                                                               | 1. Academic Center for Pathomorphological and Genetic-Molecular Diagnostics Ltd, Białystok, Poland 2. National Institute of Public Health - National Institute of                                                                                              | Anetta Sulewska; Jacek Nikliski; Janusz Dzicio; Joanna Kiluk; Katarzyna Zacharczuk; Konrad Raczkowski; Magdalena Nowakowska; Magorzata Sadkowska-Todys; Piotr Karabowicz; Piotr Majewski; Przemyslaw Bieчек. Joanna Resze; Radosaw Charkiewicz; Tomasz Wokowicz                                                                                                                                                                                                                                                                                                                                                                                                                                                                                     |

| Hygiene, Warsaw, Poland                                                                                                                                                                                                                                                                                                                                                                                                                                                                                                                                        |                                                                                                                                                                                                                        |                                                                                                                                                                                                                                                                                                                                                                                                                                                                                                                                                                                                                                                                                                                                                                                                                                                                                                                                                                                                                                                                                                              |                                                                                                                                                                                                                                                                                                                                                                                                                                                                                                                                                                                                                                                                                                                                                                                                                                                                                                       |
|----------------------------------------------------------------------------------------------------------------------------------------------------------------------------------------------------------------------------------------------------------------------------------------------------------------------------------------------------------------------------------------------------------------------------------------------------------------------------------------------------------------------------------------------------------------|------------------------------------------------------------------------------------------------------------------------------------------------------------------------------------------------------------------------|--------------------------------------------------------------------------------------------------------------------------------------------------------------------------------------------------------------------------------------------------------------------------------------------------------------------------------------------------------------------------------------------------------------------------------------------------------------------------------------------------------------------------------------------------------------------------------------------------------------------------------------------------------------------------------------------------------------------------------------------------------------------------------------------------------------------------------------------------------------------------------------------------------------------------------------------------------------------------------------------------------------------------------------------------------------------------------------------------------------|-------------------------------------------------------------------------------------------------------------------------------------------------------------------------------------------------------------------------------------------------------------------------------------------------------------------------------------------------------------------------------------------------------------------------------------------------------------------------------------------------------------------------------------------------------------------------------------------------------------------------------------------------------------------------------------------------------------------------------------------------------------------------------------------------------------------------------------------------------------------------------------------------------|
| EPI_ISL_2230261                                                                                                                                                                                                                                                                                                                                                                                                                                                                                                                                                | Laboratorium Diagnostyczne Centrum Medycznego Luxmed                                                                                                                                                                   | 1. National Institute of Public Health - National Institute of Hygiene; 2. Eurofins Genomics Europe Sequencing GmbH                                                                                                                                                                                                                                                                                                                                                                                                                                                                                                                                                                                                                                                                                                                                                                                                                                                                                                                                                                                          | ECDC COVID-19 WGS support team; Eurofins Genomics Europe Sequencing Team; Gierczyki Rafa; Sadkowska-Todys Magorzata; Wokowicz Tomasz; Zacharczuk Katarzyna                                                                                                                                                                                                                                                                                                                                                                                                                                                                                                                                                                                                                                                                                                                                            |
| EPI_ISL_1221451, EPI_ISL_1291256, EPI_ISL_1319220, EPI_ISL_1320102, EPI_ISL_1421755, EPI_ISL_1422060, EPI_ISL_1514545, EPI_ISL_1550185, EPI_ISL_1550387, EPI_ISL_1610506, EPI_ISL_1612147, EPI_ISL_1680916, EPI_ISL_1798289, EPI_ISL_1799159, EPI_ISL_1927052, EPI_ISL_2045767, EPI_ISL_2045941, EPI_ISL_2182465, EPI_ISL_2182479, EPI_ISL_2182691, EPI_ISL_2182850, EPI_ISL_2183553, EPI_ISL_2183771, EPI_ISL_2184044, EPI_ISL_2184541, EPI_ISL_2184939, EPI_ISL_2184965, EPI_ISL_2185198, EPI_ISL_2185327, EPI_ISL_2185363, EPI_ISL_2185424, EPI_ISL_2185475 | Centers for Disease Control and Prevention Division of Viral Diseases, Pathogen Discovery                                                                                                                              | Adrian Paskey; Amanda Douglas; Amanda Suchanek; Andrea Throop; Ayla Burns; Ben L. Rambo-Martin; Benjamin Rambo-Martin; Bobbi Croy; Brian Krueger; Brian Norvell; Christopher Gulvick; Christos Petropoulos; Clinton R. Paden; Craig Lukasik; Dakota Howard; Darlene Wagner; Debbie Boles; Dhvani Batra; Duncan MacCannell; Eyad Almasri; Eyad Almasri Debbie Boles; Goran Stevovic; Howard Engler; Hrushikesh Deshmukh; Jake Humphrey; Jana Schroth; Jason Caravas; Joe Voshell; John Pruitt; Jonathan Meltzer; Jonathan Williams; Kara Moser; Kimberly Wagner; Lax Iyer; Lyndon Tilson; Manoj Jain; Marcia Eisenberg; Mary Ann Cristobal; Mary Williamson; Matthew Schmerer; Michael Levandoski; Mike Sapeta; Mindy Nye; Minoo Agarwal; Mohan Kolli; Nuthawin Charonsri; Oren Cohen; Peter W. Cook; Prashant Gupta; Qian Zeng; Rama Ghatti; Scott Parker; Scott Ryan; Scott Sammons; Shatavia Morrison; Stanley Letovsky; Steven Ragan; Suresh Babu Selvaraju; Susan Countryman; Susan Hicks; Suxiang Tong; Suzanne Dale; Thomas Urban; Tim Kuphal; Tricia Zwiefelhofer; Vincent Drouillon; Yvette Unarumhi |                                                                                                                                                                                                                                                                                                                                                                                                                                                                                                                                                                                                                                                                                                                                                                                                                                                                                                       |
| see above                                                                                                                                                                                                                                                                                                                                                                                                                                                                                                                                                      | Laboratory Corporation of America                                                                                                                                                                                      |                                                                                                                                                                                                                                                                                                                                                                                                                                                                                                                                                                                                                                                                                                                                                                                                                                                                                                                                                                                                                                                                                                              |                                                                                                                                                                                                                                                                                                                                                                                                                                                                                                                                                                                                                                                                                                                                                                                                                                                                                                       |
| EPI_ISL_1020790, EPI_ISL_1021259, EPI_ISL_1030848, EPI_ISL_1030864, EPI_ISL_1161805, EPI_ISL_1163254                                                                                                                                                                                                                                                                                                                                                                                                                                                           | Laboratory Corporation of America                                                                                                                                                                                      | Respiratory Viruses Branch, Division of Viral Diseases, Centers for Disease Control and Prevention                                                                                                                                                                                                                                                                                                                                                                                                                                                                                                                                                                                                                                                                                                                                                                                                                                                                                                                                                                                                           | Amanda Douglas; Amanda Suchanek; Andrea Throop; Ayla Burns; Ben L. Rambo-Martin; Bobbi Croy; Brian Krueger; Brian Norvell; Christos Petropoulos; Clinton R. Paden; Craig Lukasik; Dakota Howard; Dhvani Batra; Duncan MacCannell; Eyad Almasri Debbie Boles; Goran Stevovic; Howard Engler; Hrushikesh Deshmukh; Jake Humphrey; Jana Schroth; Joe Voshell; John Pruitt; Jonathan Meltzer; Jonathan Williams; Kimberly Wagner; Lax Iyer; Lyndon Tilson; Manoj Jain; Marcia Eisenberg; Mary Ann Cristobal; Mary Williamson; Michael Levandoski; Mike Sapeta; Mindy Nye; Minoo Agarwal; Mohan Kolli; Nuthawin Charonsri; Oren Cohen; Peter W. Cook; Prashant Gupta; Qian Zeng; Rama Ghatti; Scott Parker; Scott Ryan; Stanley Letovsky; Steven Ragan; Suresh Babu Selvaraju; Susan Countryman; Susan Hicks; Suxiang Tong; Suzanne Dale; Thomas Urban; Tim Kuphal; Tricia Zwiefelhofer; Vincent Drouillon |
| EPI_ISL_541655, EPI_ISL_644567                                                                                                                                                                                                                                                                                                                                                                                                                                                                                                                                 | Laboratory Diagnostic, Veterinary Specialized Institute Kraljevo                                                                                                                                                       | Laboratory Diagnostic, Veterinary Specialized Institute Kraljevo                                                                                                                                                                                                                                                                                                                                                                                                                                                                                                                                                                                                                                                                                                                                                                                                                                                                                                                                                                                                                                             | Afonso, C.; Banovic Djeri, B.; Jankovic, M.; Jovanovic, T.; Knezevic, A.; Petrovic, T.; Sekler, M.; Tesovic, B.; Vidanovic, D.; Volkening, J.                                                                                                                                                                                                                                                                                                                                                                                                                                                                                                                                                                                                                                                                                                                                                         |
| EPI_ISL_754904                                                                                                                                                                                                                                                                                                                                                                                                                                                                                                                                                 | Laboratory Diagnostics and Clinical Immunology of Developmental Age, Medical University of Warsaw                                                                                                                      | genXone SA, Research & Development Laboratory; The Faculty of Mathematics, Informatics and Mechanics of the University of Warsaw                                                                                                                                                                                                                                                                                                                                                                                                                                                                                                                                                                                                                                                                                                                                                                                                                                                                                                                                                                             | Anna Gambin; Grzegorz Nowicki; Jakub Grabowski; Maciej Sykulski; Micha Kaszuba; Monika Makowska-Woniak; Natalia Drwska-Matelska; Urszula Demkow; ukasz Krych                                                                                                                                                                                                                                                                                                                                                                                                                                                                                                                                                                                                                                                                                                                                          |
| EPI_ISL_660543, EPI_ISL_667809, EPI_ISL_956317, EPI_ISL_956330, EPI_ISL_956331                                                                                                                                                                                                                                                                                                                                                                                                                                                                                 | Laboratory Medicine                                                                                                                                                                                                    | Department of Laboratory Medicine, Lin-Kou Chang Gung Memorial Hospital, Taoyuan, Taiwan                                                                                                                                                                                                                                                                                                                                                                                                                                                                                                                                                                                                                                                                                                                                                                                                                                                                                                                                                                                                                     | Cheng-Hsun Chiu; Cheng-Ta Yang; Chung-Guei Huang; Guang-Wu Chen; Kuo-Chien Tsao; Kuo-Ming Lee; Mei-Jen Hsiao; Peng-Nien Huang; Po-Wei Huang; Shin-Ru Shih; Shu-Li Yang; Yi-Chun Liu; Yu-Nong Gong                                                                                                                                                                                                                                                                                                                                                                                                                                                                                                                                                                                                                                                                                                     |
| EPI_ISL_1017690                                                                                                                                                                                                                                                                                                                                                                                                                                                                                                                                                | Laboratory for COVID19 diagnostics, Clinical Centre of Serbia                                                                                                                                                          | Institute of microbiology and Immunology, Faculty of Medicine, University of Belgrade                                                                                                                                                                                                                                                                                                                                                                                                                                                                                                                                                                                                                                                                                                                                                                                                                                                                                                                                                                                                                        | Jankovic, M.; Jovanovic, T.; Knezevic, A.; Milicevic, O.; Sekler, M.; Tesovic, B.; Vidanovic, D.                                                                                                                                                                                                                                                                                                                                                                                                                                                                                                                                                                                                                                                                                                                                                                                                      |
| EPI_ISL_2188033, EPI_ISL_2188034                                                                                                                                                                                                                                                                                                                                                                                                                                                                                                                               | Laboratory for Clinical Immunology and Molecular Genetics - University Clinic Golnik Laboratory for Respiratory Microbiology - University Clinic Golnik                                                                | Laboratory for Clinical Immunology and Molecular Genetics -University Clinic Golnik                                                                                                                                                                                                                                                                                                                                                                                                                                                                                                                                                                                                                                                                                                                                                                                                                                                                                                                                                                                                                          | Julij Šelb; Matija Rijavec; Nina Rupar; Peter Korošec; Urška Bidovec Stojkovi; Viktorija Tomi; Žan Kogovšek                                                                                                                                                                                                                                                                                                                                                                                                                                                                                                                                                                                                                                                                                                                                                                                           |
| EPI_ISL_1138983, EPI_ISL_1209407, EPI_ISL_1508895, EPI_ISL_1653933, EPI_ISL_2080973                                                                                                                                                                                                                                                                                                                                                                                                                                                                            | Laboratory for HIV and opportunistic infections diagnosis The Republican Research and Practical Center for Epidemiology and Microbiology (RRPCEM)                                                                      | Laboratory for HIV and opportunistic infections diagnosis The Republican Research and Practical Center for Epidemiology and Microbiology (RRPCEM)                                                                                                                                                                                                                                                                                                                                                                                                                                                                                                                                                                                                                                                                                                                                                                                                                                                                                                                                                            | Alena Mikhailenka; Alexander Kilchevsky; Alina Drozd; Anatoly Krasko; Anna Gudel; Artur Akhremchuk; Elena Gasich; Katsiaryna Belyakova; Kirill Bulda; Leonid Valentovich; Nastassia Kabankova; Vladimir Gorbunov; Yauhen Sysaliatsin                                                                                                                                                                                                                                                                                                                                                                                                                                                                                                                                                                                                                                                                  |
| EPI_ISL_1315327, EPI_ISL_1381310, EPI_ISL_1381320, EPI_ISL_1381351                                                                                                                                                                                                                                                                                                                                                                                                                                                                                             | Laboratory for Respiratory Viruses, Cantacuzino National Military-Medical Institute for Research and Development                                                                                                       | Cantacuzino Institute Virology                                                                                                                                                                                                                                                                                                                                                                                                                                                                                                                                                                                                                                                                                                                                                                                                                                                                                                                                                                                                                                                                               | Catalina Pascu; Luiza Ustea; Mihaela Lazar; Nicoleta Paraschiv; Sorin Dinu                                                                                                                                                                                                                                                                                                                                                                                                                                                                                                                                                                                                                                                                                                                                                                                                                            |
| EPI_ISL_435048                                                                                                                                                                                                                                                                                                                                                                                                                                                                                                                                                 | Laboratory of Applied Genetics                                                                                                                                                                                         | RSE "National Center for Biotechnology"                                                                                                                                                                                                                                                                                                                                                                                                                                                                                                                                                                                                                                                                                                                                                                                                                                                                                                                                                                                                                                                                      | Alexandr Shevtsov; Asylulan Amirgazin; Ilyas Akhmetolayev; Ruslan Kalendar; Viktoriya Lutsay; Yerlan Ramanculov                                                                                                                                                                                                                                                                                                                                                                                                                                                                                                                                                                                                                                                                                                                                                                                       |
| EPI_ISL_1138519, EPI_ISL_1138528, EPI_ISL_1138533, EPI_ISL_1138548, EPI_ISL_1138552                                                                                                                                                                                                                                                                                                                                                                                                                                                                            | Laboratory of Communicable Diseases                                                                                                                                                                                    | 1. Laboratory of Communicable Diseases (Estonia); 2. Eurofins Genomics Europe Sequencing GmbH                                                                                                                                                                                                                                                                                                                                                                                                                                                                                                                                                                                                                                                                                                                                                                                                                                                                                                                                                                                                                | Liidia Dotsenko                                                                                                                                                                                                                                                                                                                                                                                                                                                                                                                                                                                                                                                                                                                                                                                                                                                                                       |
| EPI_ISL_1249457                                                                                                                                                                                                                                                                                                                                                                                                                                                                                                                                                | Laboratory of Genetics and Personalized Medicine, Zan Mitrev Clinic                                                                                                                                                    | Laboratory of Genetics and Personalized Medicine, Zan Mitrev Clinic                                                                                                                                                                                                                                                                                                                                                                                                                                                                                                                                                                                                                                                                                                                                                                                                                                                                                                                                                                                                                                          | Kungulovski G. et al.                                                                                                                                                                                                                                                                                                                                                                                                                                                                                                                                                                                                                                                                                                                                                                                                                                                                                 |
| EPI_ISL_1420727, EPI_ISL_1420732                                                                                                                                                                                                                                                                                                                                                                                                                                                                                                                               | Laboratory of Immunohematology, Division of Hematology                                                                                                                                                                 | Greek Genome Center, Biomedical Research Foundation of the Academy of Athens (BRFAA)                                                                                                                                                                                                                                                                                                                                                                                                                                                                                                                                                                                                                                                                                                                                                                                                                                                                                                                                                                                                                         | Athanasia Mouzaki; Dimitrios Thanos; Emmanouil Athanasiadis; Ioannis Vatsellas; Katerina Zoi; Theodoros Loupis                                                                                                                                                                                                                                                                                                                                                                                                                                                                                                                                                                                                                                                                                                                                                                                        |
| EPI_ISL_803851, EPI_ISL_2153433, EPI_ISL_2154331                                                                                                                                                                                                                                                                                                                                                                                                                                                                                                               | Laboratory of Microbiology, National Reference Lab, Charles Nicolle Hospital; 2-University of Tunis ElManar, Faculty of Medicine of Tunis, LR99ES09, Tunis, Tunisia                                                    | Clinical and Experimental Pharmacology Lab, LR16SP02, National Center of Pharmacovigilance, University of Tunis El Manar, Tunis, Tunisia. 2-Neurodegenerative diseases and psychiatric troubles, LR18SP03, Razi Hospital, University of Tunis El Manar, Tunis, Tunisia. 3- Ministry of Health, National Observatory of New and Emerging Diseases, 1006, Tunis, Tunisia                                                                                                                                                                                                                                                                                                                                                                                                                                                                                                                                                                                                                                                                                                                                       | Ahmed Fakhfakh; Alia BenKahla; Gaies Emna; Habiba Ben Romdhane; Hanen El Jebari; Ilhem Boutiba-Ben Boubaker; Ilhem Boutiba-Ben Boubaker.; Imen Kacem; Imen Mdini; Jallia Ben Khelli; Maher Kharrat; Manel Ben Sassi; Mouna Ben Sassi; Mouna Safer; Nissaf Ben Aleya; Raja Mahfoudh; Riadh Daghfous; Riadh Gouider; Riadh Gouider.; Roua Ben Othman; Salma Abid; Sameh Trabelsi; Sana Ferjani; Sarra Chamman; Souissi Amira; Taha Maatoug; Zaineb Hamzaoui                                                                                                                                                                                                                                                                                                                                                                                                                                             |
| EPI_ISL_2226583, EPI_ISL_2235233                                                                                                                                                                                                                                                                                                                                                                                                                                                                                                                               | Laboratory of Molecular Biology, Mamatsio General Hospital of Kozani                                                                                                                                                   | Institute of Applied Biosciences, Centre for Research and Technology Hellas                                                                                                                                                                                                                                                                                                                                                                                                                                                                                                                                                                                                                                                                                                                                                                                                                                                                                                                                                                                                                                  | Anastasia Chatzidimitriou et al.                                                                                                                                                                                                                                                                                                                                                                                                                                                                                                                                                                                                                                                                                                                                                                                                                                                                      |
| EPI_ISL_801782                                                                                                                                                                                                                                                                                                                                                                                                                                                                                                                                                 | Laboratory of Molecular Virology, Pontificia Universidad Católica de Chile                                                                                                                                             | MSHS Pathogen Surveillance Program                                                                                                                                                                                                                                                                                                                                                                                                                                                                                                                                                                                                                                                                                                                                                                                                                                                                                                                                                                                                                                                                           | Adolfo Garcia-Sastre; Adriana van De Guchte; Ajay Obla; Ana Maria Contreras; Ana S. Gonzalez-Reiche; Bremy Albuquerque; Carlos Palma; Constanza Maldonado; Edward C. Holmes; Eileen Serrano; Erick Salinas; Hala Alshammry; Harm van Bakel; Jayeeta Dutta; Jorge Levican; Juan Soto; Leonardo I. Almonacid; M. Belen Leyton; Marcela Ferrer; Matthew M. Hernandez; Melissa Smith; Rafael A. Medina.; Robert Sebra; Shwetha Hara Sridhar; Tamara Garcia-Salun; Viviana Simon; Ying-Chih Wang; Zenab Khan                                                                                                                                                                                                                                                                                                                                                                                               |
| EPI_ISL_1363115                                                                                                                                                                                                                                                                                                                                                                                                                                                                                                                                                | Laboratory of Polymerase Chain Reaction of Federal Budget Institution of Science "Central Research Institute of Epidemiology" of The Federal Service on Customers' Rights Protection and Human Well-being Surveillance | Group of Genomics and Postgenomic Technologies of Central Research Institute of Epidemiology                                                                                                                                                                                                                                                                                                                                                                                                                                                                                                                                                                                                                                                                                                                                                                                                                                                                                                                                                                                                                 | Akimin VG; Berlina YY; Bulanenko VP; Cherkashina AS; Golubeva AG; Kaptelova VV; Kondrasheva LY; Korneenko EV; Saenko SS; Samoilov AE; Shipulina OY; Solovyeva ED; Speranskaya AS; Tivanova EV; Valdoikhina AV; Zotova MI                                                                                                                                                                                                                                                                                                                                                                                                                                                                                                                                                                                                                                                                              |
| EPI_ISL_541347, EPI_ISL_1181521                                                                                                                                                                                                                                                                                                                                                                                                                                                                                                                                | Laboratory of Respiratory Viruses and Measles, Oswaldo Cruz Institute, FIOCRUZ                                                                                                                                         | Laboratory of Respiratory Viruses and Measles, Oswaldo Cruz Institute, FIOCRUZ                                                                                                                                                                                                                                                                                                                                                                                                                                                                                                                                                                                                                                                                                                                                                                                                                                                                                                                                                                                                                               | Alice Sampaio Rocha; Ana Carolina Mendonca; Ana Carolina Mendonça; Anna Carolina Paixao; Anna Carolina Paixão; Fernando Motta; Jonathan Lopes; Luciana Appolinario; Marilda Siqueira on behalf of the Fiocruz COVID-19 Genomic Surveillance Network; Paola Resende; Renata Serrano Lopes                                                                                                                                                                                                                                                                                                                                                                                                                                                                                                                                                                                                              |
| EPI_ISL_949180                                                                                                                                                                                                                                                                                                                                                                                                                                                                                                                                                 | Laboratory of Virology and Molecular Diagnostics                                                                                                                                                                       | Institute of Public Health of Republic of North Macedonia Laboratory of Virology and Molecular Diagnostics                                                                                                                                                                                                                                                                                                                                                                                                                                                                                                                                                                                                                                                                                                                                                                                                                                                                                                                                                                                                   | Golubinka Boshevska; Maja Kuzmanovska                                                                                                                                                                                                                                                                                                                                                                                                                                                                                                                                                                                                                                                                                                                                                                                                                                                                 |
| EPI_ISL_1341379, EPI_ISL_1365638, EPI_ISL_1489929, EPI_ISL_1489930                                                                                                                                                                                                                                                                                                                                                                                                                                                                                             | Laboratory of Virology, National center of expertise                                                                                                                                                                   | RSE "National Center of Expertise" and RSE "National center for Biotechnology"                                                                                                                                                                                                                                                                                                                                                                                                                                                                                                                                                                                                                                                                                                                                                                                                                                                                                                                                                                                                                               | Abdaliyev Askar; Amirgazin Asylulan; Balykbaev Kanat; Kamalova Dinara; Ramankulov Ertan; Sharipova Saule; Shevtsov Alexandr; Tungushbayev Talgat                                                                                                                                                                                                                                                                                                                                                                                                                                                                                                                                                                                                                                                                                                                                                      |
| EPI_ISL_1191764, EPI_ISL_1191780                                                                                                                                                                                                                                                                                                                                                                                                                                                                                                                               | Laboratory of virology and molecular diagnostics                                                                                                                                                                       | Laboratory of virology and molecular diagnostics                                                                                                                                                                                                                                                                                                                                                                                                                                                                                                                                                                                                                                                                                                                                                                                                                                                                                                                                                                                                                                                             | Boshevska Golubinka; Janchevska Elizabeta; Kuzmanovska Maja                                                                                                                                                                                                                                                                                                                                                                                                                                                                                                                                                                                                                                                                                                                                                                                                                                           |
| EPI_ISL_1669956, EPI_ISL_1669991                                                                                                                                                                                                                                                                                                                                                                                                                                                                                                                               | Laboratory of virology and molecular diagnostics, Institute of Public Health                                                                                                                                           | Laboratory of virology and molecular diagnostics, Institute of Public Health                                                                                                                                                                                                                                                                                                                                                                                                                                                                                                                                                                                                                                                                                                                                                                                                                                                                                                                                                                                                                                 | Boshevska G; Janchevska E.; Kuzmanovska M                                                                                                                                                                                                                                                                                                                                                                                                                                                                                                                                                                                                                                                                                                                                                                                                                                                             |
| EPI_ISL_1364864, EPI_ISL_1364879, EPI_ISL_1448018, EPI_ISL_1448020                                                                                                                                                                                                                                                                                                                                                                                                                                                                                             | Laboratory of virology, National center of expertise                                                                                                                                                                   | RSE "National Center for Biotechnology" and RSE "National Center of Expertise"                                                                                                                                                                                                                                                                                                                                                                                                                                                                                                                                                                                                                                                                                                                                                                                                                                                                                                                                                                                                                               | Abdaliyev Askar; Amirgazin Asylulan; Balykbaev Kanat; Kamalova Dinara; Ramankulov Yerlan; Sharipova Saule; Shevtsov Alexandr; Tungushbayev Talgat                                                                                                                                                                                                                                                                                                                                                                                                                                                                                                                                                                                                                                                                                                                                                     |
| EPI_ISL_576119                                                                                                                                                                                                                                                                                                                                                                                                                                                                                                                                                 | Laboratory, The Bio Arte Limited                                                                                                                                                                                       | Laboratory, The Bio Arte Limited                                                                                                                                                                                                                                                                                                                                                                                                                                                                                                                                                                                                                                                                                                                                                                                                                                                                                                                                                                                                                                                                             | Biazzo, M.; Madeddu, S.; Pinzauti, D.; Santoro, F.                                                                                                                                                                                                                                                                                                                                                                                                                                                                                                                                                                                                                                                                                                                                                                                                                                                    |



|                                                                                                                       |                                                                                       |                                                                                                    |                                                                                                                                                                                                                                                                                                                                                                                                                                                                                                                                                                                                                                                                                         |
|-----------------------------------------------------------------------------------------------------------------------|---------------------------------------------------------------------------------------|----------------------------------------------------------------------------------------------------|-----------------------------------------------------------------------------------------------------------------------------------------------------------------------------------------------------------------------------------------------------------------------------------------------------------------------------------------------------------------------------------------------------------------------------------------------------------------------------------------------------------------------------------------------------------------------------------------------------------------------------------------------------------------------------------------|
| EPI_ISL_576123                                                                                                        | Laboratory, The Bio Arte Limited                                                      | Laboratory, The Bio Arte Limited                                                                   | Biazzo, M.; Madeddu, S.; Pinzauti, D.; Santoro, F.                                                                                                                                                                                                                                                                                                                                                                                                                                                                                                                                                                                                                                      |
| EPI_ISL_2157407                                                                                                       | Laboratório Central de Saude Publica do Estado de Santa Catarina (LACEN/SC)           | Laboratory of Respiratory Viruses and Measles, Oswaldo Cruz Institute, FIOCRUZ                     | Alice Sampaio Rocha; Ana Carolina Mendonca; Anna Carolina Paixao; Darcita Buerger Rovaris; Elisa Cavalcante Pereira; Fernando Motta; Luciana Appolinario; Marilda Siqueira on behalf of the Fiocruz COVID-19 Genomic Surveillance Network; Paola Resende; Renata Serrano Lopes; Sandra Bianchini Fernandes; Taina Venas                                                                                                                                                                                                                                                                                                                                                                 |
| EPI_ISL_2241605                                                                                                       | Laboratório Central de Saúde Pública de Pernambuco                                    | Coordenação Geral de Laboratórios de Saúde Pública (CGLAB/DAEVS/SVS/MS)                            | Vagner Fonseca; et al.                                                                                                                                                                                                                                                                                                                                                                                                                                                                                                                                                                                                                                                                  |
| EPI_ISL_792569, EPI_ISL_792596                                                                                        | Laboratório Central de Saúde Pública do Estado da Paraíba (LACEN-PB)                  | Laboratory of Respiratory Viruses and Measles, Oswaldo Cruz Institute, FIOCRUZ                     | Ana Carolina Mendonca; Anna Carolina Paixao; Dalane Loudal Florentino Teixeira; Fernando Motta; João Felipe Bezerra; Luciana Appolinario; Marilda Siqueira on behalf of the Fiocruz COVID-19 Genomic Surveillance Network; Paola Resende; Romero Henrique Teixeira de Vasconcelos; Thiago Franco de Oliveira Carneiro                                                                                                                                                                                                                                                                                                                                                                   |
| EPI_ISL_729812, EPI_ISL_729827, EPI_ISL_729833                                                                        | Laboratório Central de Saúde Pública do Estado do Rio Grande do Sul (LACEN-RS)        | Laboratory of Respiratory Viruses and Measles, Oswaldo Cruz Institute, FIOCRUZ                     | Ana Carolina Mendonça; Anna Carolina Paixão; Fernando Motta; Luciana Appolinario; Marilda Siqueira on behalf of the Fiocruz COVID-19 Genomic Surveillance Network; Marilda Teixeira Mar da Rosa; Paola Resende; Tatiana Schaffer Gregriani                                                                                                                                                                                                                                                                                                                                                                                                                                              |
| EPI_ISL_2241595                                                                                                       | Laboratório Central de Saúde Pública do Piaui                                         | Coordenação Geral de Laboratórios de Saúde Pública (CGLAB/DAEVS/SVS/MS)                            | Vagner Fonseca; et al.                                                                                                                                                                                                                                                                                                                                                                                                                                                                                                                                                                                                                                                                  |
| EPI_ISL_1213163                                                                                                       | Laboratório HLA/UERJ                                                                  | Bioinformatics Laboratory / LNCC                                                                   | Alessandra P Lamarca; Alexandra L Gerber; Ana Paula Melo Mariano; Ana Paula de C Guimarães; Ana Tereza R Vasconcelos; Angela Maria Guimarães Santos; Bianca Mendes Maciel; Danielle Angst Secco; Eduardo Sérgio Soares Sousa; Eloiza Helena Campana; Francisco Paulo Freire Neto; George Rego Albuquerque; Kátia Castanho Scortecchi; Lucymara Fassarella Agnez Lima; Luiz G P de Almeida; Luís Cristóvão Porto; Otavio J. Brustolini; Paulo Ricardo Nascimento; Ronaldo da Silva Francisco Jr; Sandra Rocha Gadelha; Selma Maria Bezerra Jeronimo; Vinícius Pietta Perez                                                                                                               |
| EPI_ISL_1494984                                                                                                       | Laboratório de Biologia Integrativa                                                   | Laboratório de Biologia Integrativa                                                                | Alessandro Clayton de Souza Ferreira; Aline Brito de Lima; Carolina Moreira Voloch; Daniel Costa Queiroz; Danielle Alves Gomes Zaui; Diego Menezes Bonfim; Filipe Romero Rebello Moreira; Frederico Scott Varella Malta; Joice do Prado Silva; Lucylene Miguita Luiz; Nuno Rodrigues Faria; Paula Luize Camargos Fonseca; Rafael Marques de Souza; Renan Pedra de Souza; Renato Santana Aguiar; Rennan Garcias Moreira; Victor Cabralcanti Pardini; Victor Emmanuel Viana Geddes                                                                                                                                                                                                        |
| EPI_ISL_2150976, EPI_ISL_2150977, EPI_ISL_2150978, EPI_ISL_2150997                                                    | Laboratório de Biologia Molecular Jean Piaget                                         | MRCG at LSHTM, Genomics lab                                                                        | Abdoulie Kante; Abdul Karim Sesay; Adul Candé; Aicha Balde; Aladje Balde; Bakary Sanyang; Bubacar Delgado Pinto Embaló; Dabiri Damilari; Edmira Abia da Costa; Erica Luis Maria Magalhães; Faatu Cassama; Mariama Kujabi; Milanca Agostinho Cá; Paulina Joáozinho da Costa Jarrá Manneh; Rei José Pereira; Rui Innodi; Sainabou Laye Ndure; Simão Tchuda Bioté                                                                                                                                                                                                                                                                                                                          |
| EPI_ISL_1004235                                                                                                       | Laboratório de Virologia - Instituto de Medicina Tropical - Universidade de São Paulo | Laboratório de Parasitologia Médica - Instituto de Medicina Tropical - Universidade de São Paulo   | Alvina Clara Felix; Anderson de Paula; Brazil-UK Centre for Arbovirus Discovery Diagnosis Genomics and Epidemiology (CADDE) Genomic Network - Instituto de Medicina Tropical; Camilla Malta Romano; Darlan Candido; Esmeria Coelho; Ester C. Sabino; Flavia Cristina Sales; Franciane Mendes; Giulia Magalhães Ferreira; Ingra Morales Claro; Jaqueline Goes de Jesus; Lucas A. Moyses Franco; Midia Ferreira; Nuno Faria; Pamela dos Santos Andrade                                                                                                                                                                                                                                    |
| EPI_ISL_1973556                                                                                                       | Labormedizinisches Zentrum Dr Risch                                                   | Clinical Bacteriology                                                                              | Adrian Egli; Alfredo Mari; Hans Hirsch; Helena MB Seth-Smith; Julia Bielicki; Karoline Leuzinger; Lorenz Risch; Madlen Stange; Manuel Battegay; Martin Risch; Nadia Wohlwend; Tim Roloff                                                                                                                                                                                                                                                                                                                                                                                                                                                                                                |
| EPI_ISL_1036127, EPI_ISL_1233630                                                                                      | Labormedizinisches Zentrum Dr Risch                                                   | University Hospital Basel, Clinical Bacteriology                                                   | Adrian Egli; Alfredo Mari; Hans Hirsch; Helena MB Seth-Smith; Julia Bielicki; Karoline Leuzinger; Lorenz Risch; Madlen Stange; Manuel Battegay; Martin Risch; Nadia Wohlwend; Tim Roloff                                                                                                                                                                                                                                                                                                                                                                                                                                                                                                |
| EPI_ISL_2196255                                                                                                       | Laboratório Central de Saude Publica do Estado de Santa Catarina (LACEN/SC)           | Laboratory of Respiratory Viruses and Measles, Oswaldo Cruz Institute, FIOCRUZ                     | Alice Sampaio Rocha; Ana Carolina Mendonca; Anna Carolina Paixao; Darcita Buerger Rovaris; Elisa Cavalcante Pereira; Fernando Motta; Luciana Appolinario; Marilda Siqueira on behalf of the Fiocruz COVID-19 Genomic Surveillance Network; Paola Resende; Renata Serrano Lopes; Sandra Bianchini Fernandes; Taina Venas                                                                                                                                                                                                                                                                                                                                                                 |
| EPI_ISL_407079                                                                                                        | Lapland Central Hospital                                                              | Department of Virology, University of Helsinki and Helsinki University Hospital, Helsinki, Finland | Hannimari Kallio-Kokko; Olli Vapalahti; Suvi Kuivanen; Teemu Smura                                                                                                                                                                                                                                                                                                                                                                                                                                                                                                                                                                                                                      |
| EPI_ISL_498554                                                                                                        | Lebanese American University                                                          | Lebanese American University                                                                       | Abdallah, J.; Abi Habib, W.; El Shesheny, R.; Goldstein, J. and Kayali, G.; Mokhbat, J.; R.J.; Webby                                                                                                                                                                                                                                                                                                                                                                                                                                                                                                                                                                                    |
| EPI_ISL_447900                                                                                                        | Lednický Laboratory at Emerging Pathogens Institute                                   | University of Florida                                                                              | Alam; C.J.; Elbady; Gibson; J.A.; J.C.; J.G.; Lednický; M.A. and Morris; M.M.; Stephenson                                                                                                                                                                                                                                                                                                                                                                                                                                                                                                                                                                                               |
| EPI_ISL_1043977, EPI_ISL_1830628, EPI_ISL_2198858, EPI_ISL_2198996                                                    | Lighthouse Lab in Alderley Park                                                       | Wellcome Sanger Institute for the COVID-19 Genomics UK (COG-UK) Consortium                         | Cordelia Langford; David K. Jackson; Dominic Kwiatkowski; Ewan Harrison; Ian Johnston; Jacquelyn Wynn; Jeffrey Barrett; John Sillitoe on behalf of the Wellcome Sanger Institute COVID-19 Surveillance Team; Mairead Hyland; Roberto Amato; Sonia Goncalves; The Lighthouse Lab in Alderley Park and Alex Alderton                                                                                                                                                                                                                                                                                                                                                                      |
| EPI_ISL_557831, EPI_ISL_558720                                                                                        | Lighthouse Lab in Alderley Park                                                       | Wellcome Sanger Institute for the COVID-19 Genomics UK (COG-UK) consortium                         | Cordelia Langford; David K. Jackson; Dominic Kwiatkowski; Ewan Harrison; Ian Johnston; John Sillitoe on behalf of the Wellcome Sanger Institute COVID-19 Surveillance Team; Roberto Amato; Sonia Goncalves; The Lighthouse Lab in Alderley Park and Alex Alderton                                                                                                                                                                                                                                                                                                                                                                                                                       |
| EPI_ISL_659281, EPI_ISL_702210                                                                                        | Lighthouse Lab in Cambridge                                                           | Wellcome Sanger Institute for the COVID-19 Genomics UK (COG-UK) Consortium                         | Cordelia Langford; David K. Jackson; Dominic Kwiatkowski; Ewan Harrison; Ian Johnston; John Sillitoe on behalf of the Wellcome Sanger Institute COVID-19 Surveillance Team; Rob Howes; Roberto Amato; Sonia Goncalves; The Lighthouse Lab in Cambridge and Alex Alderton                                                                                                                                                                                                                                                                                                                                                                                                                |
| EPI_ISL_907226, EPI_ISL_1631275, EPI_ISL_1697811                                                                      | Lighthouse Lab in Glasgow                                                             | Wellcome Sanger Institute for the COVID-19 Genomics UK (COG-UK) Consortium                         | Anna Dominiczak and Alex Alderton; Carol Clugston; Cordelia Langford; David Gray; David K. Jackson; Dominic Kwiatkowski; Ewan Harrison; Harper VanSteenhouse; Ian Johnston; Jeffrey Barrett; John Sillitoe on behalf of the Wellcome Sanger Institute COVID-19 Surveillance Team; Roberto Amato; Sonia Goncalves; Yumi Kasai                                                                                                                                                                                                                                                                                                                                                            |
| EPI_ISL_1376604, EPI_ISL_1718602, EPI_ISL_2118084                                                                     | Lighthouse Lab in Milton Keynes                                                       | Wellcome Sanger Institute for the COVID-19 Genomics UK (COG-UK) Consortium                         | Cordelia Langford; David K. Jackson; Dominic Kwiatkowski; Ewan Harrison; Ian Johnston; Jeffrey Barrett; John Sillitoe on behalf of the Wellcome Sanger Institute COVID-19 Surveillance Team; Roberto Amato; Sonia Goncalves; The Lighthouse Lab in Milton Keynes and Alex Alderton                                                                                                                                                                                                                                                                                                                                                                                                      |
| EPI_ISL_557209                                                                                                        | Lighthouse Lab in Milton Keynes                                                       | Wellcome Sanger Institute for the COVID-19 Genomics UK (COG-UK) consortium                         | Cordelia Langford; David K. Jackson; Dominic Kwiatkowski; Ewan Harrison; Ian Johnston; John Sillitoe on behalf of the Wellcome Sanger Institute COVID-19 Surveillance Team ( <a href="http://www.sanger.ac.uk/covid-team">http://www.sanger.ac.uk/covid-team</a> ); Roberto Amato; Sonia Goncalves; The Lighthouse Lab in Milton Keynes and Alex Alderton                                                                                                                                                                                                                                                                                                                               |
| EPI_ISL_2112774                                                                                                       | Limbach - MVZ Labor Ravensburg Labor Dr. Gartner                                      | Robert Koch Institute                                                                              |                                                                                                                                                                                                                                                                                                                                                                                                                                                                                                                                                                                                                                                                                         |
| EPI_ISL_1008713                                                                                                       | Lister Laboratório de Referencia S.A. de C.V.                                         | Instituto de diagnóstico y Referencia Epidemiológicos (INDRE) Departamento de Virología            | Abril Rodriguez-Maldonado; Claudia Wong-Arambula; Ernesto Ramirez-Gonzalez.; Fabiola Garces-Ayala; Gisela Barrera-Badillo; Irma Lopez-Martinez; Lucia Hernandez-Rivas; Natividad Cruz-Ortiz; Tatiana Nunez-Garcia                                                                                                                                                                                                                                                                                                                                                                                                                                                                       |
| EPI_ISL_1262613, EPI_ISL_1262621, EPI_ISL_1262623                                                                     | Lithuanian University of Health Sciences Hospital, Department of Laboratory Medicine  | Lithuanian University of Health Sciences Hospital, Department of Genetics and Molecular Medicine   | Astra Vitkauskienė; Darius Cereskevicius; Inga Nasvytiene; Mantas Saraukas; Marius Sukys; Rasa Ugenskiene; Renaldas Jurkevicius; Zilvė Zemeckienė                                                                                                                                                                                                                                                                                                                                                                                                                                                                                                                                       |
| EPI_ISL_541874                                                                                                        | Lithuanian University of Health Sciences Hospital, Department of Laboratory Medicine  | Lithuanian University of Health Sciences, Laboratory of Molecular Cardiology                       | Arnoldas Pautienius; Astra Vitkauskienė; Dovydas Gecys; Kamile Tamusauskaite; Laura Pareckaitė; Lukas Zemaitis; Vaiva Lesauskaite                                                                                                                                                                                                                                                                                                                                                                                                                                                                                                                                                       |
| EPI_ISL_636843                                                                                                        | Lithuanian University of Health Sciences Hospital, Department of Laboratory Medicine  | Lithuanian University of Health Sciences, Molecular cardiology lab.                                | Arnoldas Pautienius; Astra Vitkauskienė; Dovydas Gecys; Ingrida Olendrait; Kamile Tamusauskaite; Laura Pareckaitė; Lukas Zemaitis; Vaiva Lesauskaite                                                                                                                                                                                                                                                                                                                                                                                                                                                                                                                                    |
| EPI_ISL_517134                                                                                                        | Liverpool Clinical Laboratories                                                       | COVID-19 Genomics UK (COG-UK) Consortium                                                           | A Alrezaihi; Alessandro Gerada; Alistair Darby; Angela Cowell; Anita Lucaci; Anu Chawla; Cassie Olateju; Catherine Hartley; Charlotte Nelson; Ecaterina Vamos; Elaine O'Toole; Eleanor G Bentley; Ghada T Shawli; Isabel Garcia-Dorival; James Johnson; James P Stewart; Jenifer Manson; Joanne Watts; Jones Benjamin; Jordan J Clark; Julian Hiscox; L Luu; Lucille Rainbow; M Almsaud; Margaret Hughes; Mark Whitehead; Matthew Gemmill; Miren Iturriza-Gomara; Muhannad Alruwaili; N.P Randle; Neil Swainston; PKF Gilmore; Parul Sharma; Rebekah Penrice-Randal; Richard Eccles; Richard Gregory; Sam Haldenby; Steve Paterson; Stuart D Armstrong; Trevor Ian Robinson; Ximeng Han |
| EPI_ISL_1827699, EPI_ISL_1827701, EPI_ISL_1827703                                                                     | Lobamba                                                                               | National Institute for Communicable Diseases of the National Health Laboratory Service             | Amoako DG; Bhiman JN; Ismail A; Mahlangu B; Maphalala GP; Mohale T; Ntuli N; Scheepers C                                                                                                                                                                                                                                                                                                                                                                                                                                                                                                                                                                                                |
| EPI_ISL_1224788                                                                                                       | M Health Fairview                                                                     | Minnesota Department of Health, Public Health Laboratory                                           | Alexandra Lorentz; Jacob Garfin; Matt Plumb; and Xiong Wang                                                                                                                                                                                                                                                                                                                                                                                                                                                                                                                                                                                                                             |
| EPI_ISL_1257968, EPI_ISL_1257994, EPI_ISL_1258370, EPI_ISL_1258373, EPI_ISL_1258413, EPI_ISL_1594124, EPI_ISL_1594234 | see above                                                                             | National Microbiology Laboratory (NML)                                                             | Anna Majer; Anneliese Landgraaf; CanCOGeN's metadata curation team; Darian Hole; David Alexander; Elsie Grudski; Gary Van Domselaar; Grace Seo;                                                                                                                                                                                                                                                                                                                                                                                                                                                                                                                                         |

|                                                                                                                                                                                                                                                                                                 |                                                                                                             |                                                                                                                                                                                         |                                                                                                                                                                                                                                                                                                                                                                                                                                                                                                                                                                                                                                        |
|-------------------------------------------------------------------------------------------------------------------------------------------------------------------------------------------------------------------------------------------------------------------------------------------------|-------------------------------------------------------------------------------------------------------------|-----------------------------------------------------------------------------------------------------------------------------------------------------------------------------------------|----------------------------------------------------------------------------------------------------------------------------------------------------------------------------------------------------------------------------------------------------------------------------------------------------------------------------------------------------------------------------------------------------------------------------------------------------------------------------------------------------------------------------------------------------------------------------------------------------------------------------------------|
|                                                                                                                                                                                                                                                                                                 |                                                                                                             |                                                                                                                                                                                         | Jared Bullard; Jennifer Tanner; Kerry Dust; Kirsten Biggar; Madison Chapel; Morag Graham; Natalie Knox; Nathalie Bastien; Paul Van Caesele; Philip Mabon; Public Health Agency of Canada CanCOGeN team; Rhianon Huzarewich; Russell Mandes; Shari Tyson; Timothy Booth; Yan Li                                                                                                                                                                                                                                                                                                                                                         |
| EPI_ISL_1936172                                                                                                                                                                                                                                                                                 | MD PHL                                                                                                      | MD PHL                                                                                                                                                                                  | Maryland Department of Health Laboratories Administration                                                                                                                                                                                                                                                                                                                                                                                                                                                                                                                                                                              |
| EPI_ISL_445263                                                                                                                                                                                                                                                                                  | MEGASALUD SPA.                                                                                              | Instituto de Salud Publica de Chile                                                                                                                                                     | Alejandra Acevedo; Andrés E Castillo; Bárbara Parra; Carolina Tambley; Gabriel Leal; Jaime Lagos; Jorge Fernandez; Loredana Arata; Patricia Bustos; Paz Tapia; Rodrigo Fasce; Winston Andrade                                                                                                                                                                                                                                                                                                                                                                                                                                          |
| EPI_ISL_804565                                                                                                                                                                                                                                                                                  | MEPHI, Aix Marseille University                                                                             | MEPHI, Aix Marseille University                                                                                                                                                         | Anthony LEVASSEUR                                                                                                                                                                                                                                                                                                                                                                                                                                                                                                                                                                                                                      |
| EPI_ISL_1663543                                                                                                                                                                                                                                                                                 | MGM Medical College, Jamshedpur                                                                             | Institute of Life Sciences - INSACOG                                                                                                                                                    | Ajay Parida; Amol M. Kanampalliwar; Arup Ghosh; Atimukta Jha; INSACOG Consortium; Punit Prasad; Rajeeb Swain; Rupesh Dash; Safal Walia; Shifu Aggarwal; Sunil K. Raghav                                                                                                                                                                                                                                                                                                                                                                                                                                                                |
| EPI_ISL_1227061                                                                                                                                                                                                                                                                                 | MONTEFIORE MEDICAL CENTER LABORATORIES                                                                      | Wadsworth Center, New York State Department of Health                                                                                                                                   | Alexis Russel; Daryl M. Lamson; Erasmus Schneider; Erica Lasek-Nessequist; John Kelly; Jonathan Pitnick; Kirsten St. George; Matthew Shudt; Melissa A Leisner; Navjot Singh                                                                                                                                                                                                                                                                                                                                                                                                                                                            |
| EPI_ISL_1970564, EPI_ISL_1970565, EPI_ISL_1970566, EPI_ISL_1970567, EPI_ISL_1970568                                                                                                                                                                                                             | MRC/UVRI & LSHTM Uganda Research Unit                                                                       | MRC/UVRI & LSHTM Uganda Research Unit                                                                                                                                                   | Dan Lule Bugembe; Isaac Sseeewanyana; Matthew Cotten; My V.T. Phan; Patrick Semanda; Pontiano Kaleebu; Susan Nabadda                                                                                                                                                                                                                                                                                                                                                                                                                                                                                                                   |
| EPI_ISL_954247, EPI_ISL_954299, EPI_ISL_1469313, EPI_ISL_1469314, EPI_ISL_1469316, EPI_ISL_1469318, EPI_ISL_1469320, EPI_ISL_1469325, EPI_ISL_1469429                                                                                                                                           |                                                                                                             |                                                                                                                                                                                         |                                                                                                                                                                                                                                                                                                                                                                                                                                                                                                                                                                                                                                        |
| see above                                                                                                                                                                                                                                                                                       | MRC/UVRI & LSHTM Uganda Research Unit                                                                       | Where sequence data have been generated and submitted to GISAID                                                                                                                         | Dan Lule Bugembe; Isaac Sseeewanyana; Matthew Cotten; My V.T. Phan; Patrick Semanda; Pontiano Kaleebu; Susan Nabadda                                                                                                                                                                                                                                                                                                                                                                                                                                                                                                                   |
| EPI_ISL_471166, EPI_ISL_561216, EPI_ISL_810982, EPI_ISL_915421, EPI_ISL_1216079, EPI_ISL_1216085, EPI_ISL_1234529, EPI_ISL_1234530, EPI_ISL_1731549, EPI_ISL_1731557                                                                                                                            |                                                                                                             |                                                                                                                                                                                         |                                                                                                                                                                                                                                                                                                                                                                                                                                                                                                                                                                                                                                        |
| see above                                                                                                                                                                                                                                                                                       | MRCG at LSHTM Genomics lab                                                                                  | MRCG at LSHTM Genomics lab                                                                                                                                                              | Abdoulie Kante; Abdul Karim sesay; Bakary Sanyang; Jarra Manneh; Mariama Kujabi; Sesay et al                                                                                                                                                                                                                                                                                                                                                                                                                                                                                                                                           |
| EPI_ISL_414476                                                                                                                                                                                                                                                                                  | MSHS Clinical Microbiology Laboratories                                                                     | MSHS Pathogen Surveillance Program                                                                                                                                                      | Adolfo Garcia-Sarstre; Alberto Paniz-mondolfi; Ana Sylvia Gonzalez-Reiche; Emilia Sordillo; Florian Krammer; Gopi Patel; Harm van Bakel; Jose Polanco; Judith Aberg; Lisa Miorin; Matthew Hernandez; Melissa Gitman; Melissa Smith; Nancy Francoeur; Randy Albrecht; Robert Sebra; Shclie Fabre; Viviana Simon; Wen-chun Liu; Zenab Khan                                                                                                                                                                                                                                                                                               |
| EPI_ISL_2229291                                                                                                                                                                                                                                                                                 | MT Public Health Laboratory                                                                                 | Centers for Disease Control and Prevention Division of Viral Diseases, Pathogen Discovery                                                                                               | Alison Laufer Halpin; Ben L. Rambo-Martin; Clinton R. Paden; Dakota Howard; Darlene Wagner; Dave Wentworth; Dhvani Batra; Jasmine Padilla; Justin Lee; Katie Dillon; Krista Queen; Kristen Knipe; Kristine Lacek; Mark Burroughs; Matthew Schmeer; Milli Sheth; Peter Cook; Sam Shepard; Sarah Nobles; Shoshona Le; Suxiang Tong; Vivien Dugan; Yvette Unoarumhi                                                                                                                                                                                                                                                                       |
| EPI_ISL_1408897                                                                                                                                                                                                                                                                                 | MT Public Health Laboratory                                                                                 | Genomics and Discovery, Respiratory Viruses Branch, Division of Viral Diseases, Centers for Disease Control and Prevention                                                              | Anna Kelleher; Anna Uehara; Brian Lynch; Clinton R. Paden; Haibin Wang; Han Jia Justin Ng; Jing Zhang; Krista Queen; Peter Cook; Suxiang Tong; Yan Li; Ying Tao                                                                                                                                                                                                                                                                                                                                                                                                                                                                        |
| EPI_ISL_1482843                                                                                                                                                                                                                                                                                 | MUSC Molecular Pathology Laboratory                                                                         | MUSC Molecular Pathology Laboratory                                                                                                                                                     | Dariusz Pytel; Frederick S. Nolte; Jaclyn Dunne; Julie W. Hirschhorn; Kristen Maurer; W. Bailey Glen Jr                                                                                                                                                                                                                                                                                                                                                                                                                                                                                                                                |
| EPI_ISL_1936108, EPI_ISL_1936123, EPI_ISL_1936136, EPI_ISL_1936140, EPI_ISL_1936145, EPI_ISL_1936198, EPI_ISL_1936205, EPI_ISL_1936230, EPI_ISL_1936234, EPI_ISL_1936246, EPI_ISL_1936252, EPI_ISL_1936253, EPI_ISL_1936259, EPI_ISL_1936279, EPI_ISL_1936297, EPI_ISL_1936299, EPI_ISL_1936325 |                                                                                                             |                                                                                                                                                                                         |                                                                                                                                                                                                                                                                                                                                                                                                                                                                                                                                                                                                                                        |
| see above                                                                                                                                                                                                                                                                                       | Main Chemical Laboratories Egypt Army                                                                       | Main Chemical Laboratories Egypt Army                                                                                                                                                   | Abdullah Salama; AbedElrahman Zekri; Ahmed Gad; Bassem Elharty; Laila Elsayw; Mervat Hassan; Mohamed Abdel-Monem; Mohamed El-Esawi; Mohamed Seadawy; Mohamed Shamel; Mostfa Elhoseiny; Mostfa Yakout; Ola Elroby; Sabah Ahmed; Sherine Helmy                                                                                                                                                                                                                                                                                                                                                                                           |
| EPI_ISL_513459                                                                                                                                                                                                                                                                                  | Maine HETL                                                                                                  | Tewhey Lab, The Jackson Laboratory                                                                                                                                                      | Barter, M.; Dewey, H.; H. and Tewhey, R.; Lynch, R.; Matluk, N.; Munger                                                                                                                                                                                                                                                                                                                                                                                                                                                                                                                                                                |
| EPI_ISL_1523670, EPI_ISL_1826466                                                                                                                                                                                                                                                                | Maine Health and Environmental Testing Laboratory                                                           | Tewhey Lab, The Jackson Laboratory                                                                                                                                                      | Barter, M.; Dewey, H.; H. and Tewhey, R.; Iosue, F.; Lynch, R.; Matluk, N.; Munger                                                                                                                                                                                                                                                                                                                                                                                                                                                                                                                                                     |
| EPI_ISL_937387                                                                                                                                                                                                                                                                                  | Maine Health and Environmental Testing Laboratory (Maine HETL)                                              | Tewhey Lab, The Jackson Laboratory                                                                                                                                                      | Barter, M.; Dewey, H.; H. and Tewhey, R.; Iosue, F.; Lynch, R.; Matluk, N.; Munger                                                                                                                                                                                                                                                                                                                                                                                                                                                                                                                                                     |
| EPI_ISL_1827698, EPI_ISL_1827700, EPI_ISL_1827704                                                                                                                                                                                                                                               | Manzana                                                                                                     | National Institute for Communicable Diseases of the National Health Laboratory Service                                                                                                  | Amoako DG; Bhiman JN; Ismail A; Mahlangu B; Maphalala GP; Mohale T; Ntuli N; Scheepers C                                                                                                                                                                                                                                                                                                                                                                                                                                                                                                                                               |
| EPI_ISL_2157181                                                                                                                                                                                                                                                                                 | Mapmygenome                                                                                                 | CSIR-Centre for Cellular and Molecular Biology - INSACOG                                                                                                                                | Amreshwar Vodapalli; Ara Sreenivas; B Himasri; Divya Tej Sowpati; Karthik Bharadwaj Tallapaka; Lamuk Zaveri; Onkar Kulkarni; Rakesh K Mishra; Sharath Chandra Thota; Shreekant Verma; Sofia Banu; Viswagithe S L                                                                                                                                                                                                                                                                                                                                                                                                                       |
| EPI_ISL_1444860, EPI_ISL_1706103                                                                                                                                                                                                                                                                | Maryland Genomics, Institute for Genome Sciences, University of Maryland School of Medicine                 | Maryland Genomics, Institute for Genome Sciences, University of Maryland School of Medicine                                                                                             | Aditya; Claire M; Fraser; Holly; Humphrys; Jacques; Kranthi; Lisa D; Luke J; Mehta; Mike; Ott; Ravel; Roussey; Sadzewicz; Sandra; Tallon; Vavikolanu                                                                                                                                                                                                                                                                                                                                                                                                                                                                                   |
| EPI_ISL_1910606, EPI_ISL_1910613, EPI_ISL_1910617, EPI_ISL_1913025                                                                                                                                                                                                                              | Mashrek Medical Diagnostic Center                                                                           | Microbial Pathogenomics Lab - LAU                                                                                                                                                       | Georgi Merhi; Jad Koweyes; Sima Tokajian; Tamara Salloum                                                                                                                                                                                                                                                                                                                                                                                                                                                                                                                                                                               |
| EPI_ISL_1503490, EPI_ISL_1503787                                                                                                                                                                                                                                                                | Massachusetts State Public Health Laboratory                                                                | Massachusetts State Public Health Laboratory                                                                                                                                            | Andrew Lang; Glen Gallagher; Sandra Smole; Timelia Fink                                                                                                                                                                                                                                                                                                                                                                                                                                                                                                                                                                                |
| EPI_ISL_1751774                                                                                                                                                                                                                                                                                 | Max von Pettenkofer Institute, Virology, National Reference Center for Retroviruses, LMU Munich             | Laboratory for Functional Genome Analysis; Dept. Genomics; Gene Center of the LMU Munich                                                                                                | Alexander Graf; Helmut Blum; Max Muenchhoff; Oliver Keppler; Stefan Krebs                                                                                                                                                                                                                                                                                                                                                                                                                                                                                                                                                              |
| EPI_ISL_1205383, EPI_ISL_1224756, EPI_ISL_1224759                                                                                                                                                                                                                                               | Mayo Clinic & Mayo Clinic Laboratories                                                                      | Minnesota Department of Health, Public Health Laboratory                                                                                                                                | Alexandra Lorentz; Jacob Garfin; Matt Plumb; and Xiong Wang                                                                                                                                                                                                                                                                                                                                                                                                                                                                                                                                                                            |
| EPI_ISL_1827706, EPI_ISL_1827707                                                                                                                                                                                                                                                                | Mbabane Public Health                                                                                       | National Institute for Communicable Diseases of the National Health Laboratory Service                                                                                                  | Amoako DG; Bhiman JN; Ismail A; Mahlangu B; Maphalala GP; Mohale T; Ntuli N; Scheepers C                                                                                                                                                                                                                                                                                                                                                                                                                                                                                                                                               |
| EPI_ISL_2234383                                                                                                                                                                                                                                                                                 | Medical Biology Department, Tokat Gaziosmanpasa University                                                  | Medical Biology Department, Tokat Gaziosmanpasa University                                                                                                                              | Al-Attar; B.O.; Ibrahim; Kanabe; Khailany; M.O.; M.S. and Ozaslan, M.; O.Q.; R.A.; Rahman                                                                                                                                                                                                                                                                                                                                                                                                                                                                                                                                              |
| EPI_ISL_1508848                                                                                                                                                                                                                                                                                 | Medical Genetics Laboratory, Regional Centre of Medical Genetics, Emergency County Hospital Craiova         | Medical Genetics Laboratory, Regional Centre of Medical Genetics, Emergency County Hospital Craiova                                                                                     | Adina Dragos; Ana-Maria Buga; Anca-Lelia (Riza) Costache; Andrei Pirvu; Elena Plesea; Ioana Streata; Mihai Cucu; Mihai Ioana; Monica Cara; Razvan Plesea; Stefania Dorobantu                                                                                                                                                                                                                                                                                                                                                                                                                                                           |
| EPI_ISL_2107509, EPI_ISL_2107510, EPI_ISL_2107521                                                                                                                                                                                                                                               | Medical Laboratory Sciences, Arab American University                                                       | Medical Laboratory Sciences, Arab American University                                                                                                                                   | Al-Jawabreh, A.; Al-Jawabreh, H.; Dumaidi, K.; Ereqat, S.; Nasereddin, A.                                                                                                                                                                                                                                                                                                                                                                                                                                                                                                                                                              |
| EPI_ISL_1819880                                                                                                                                                                                                                                                                                 | Medical Microbiology Unit, Department for Laboratory Medicine, Drammen Hospital, Vestre Viken Health Trust, | Norwegian Institute of Public Health, Department of Virology                                                                                                                            | Atiya R Ali; Debec Nadia; Engebretsen Serina Beate; Garcia Liorente Ignacio; Hilde Elshaug; Hilde Vollan; Jon Bråte; Kamilla Heddeland Instefjord; Karoline Bragstad; Kathrine Stene-Johansen; Marie Paulsen Madsen; Olav Hungnes; Pedersen Benedikte Nevjen; Rasmus Riis Kopperud                                                                                                                                                                                                                                                                                                                                                     |
| EPI_ISL_1302495, EPI_ISL_1302586, EPI_ISL_1357638                                                                                                                                                                                                                                               | Medicina practica laboratorija                                                                              | Lithuanian University of Health Sciences Hospital, Department of Genetics and Molecular Medicine                                                                                        | Astra Vitkauskienė; Darius Cereskevicius; Inga Nasvytiene; Mantas Sarauskas; Marius Sukys; Rasa Ugenskiene; Renaldas Jurkevicius; Zivile Zemeckiene                                                                                                                                                                                                                                                                                                                                                                                                                                                                                    |
| EPI_ISL_1048371, EPI_ISL_1791042, EPI_ISL_1914423                                                                                                                                                                                                                                               | Megalab, Molecular and Cytogenetics Diagnostics                                                             | Department for Virology, Molecular Biology and Genome Research, R. G. Lugar Center for Public Health Research, National Center for Disease Control and Public Health (NCDC) of Georgia. | Adam Kotorashvili; Amiran Gamkrelidze.; Amiran Gamkrelidze. Submitter information; Ana Papkauri; Ann Machabishvili; Anna Kasradze; Davit Tsaguria; Ekaterine Khmaladze; Ekaterine Zangaladze; Ekaterine Zhgenti; Giorgi Gogoladze; Giorgi Tomashvili; Gvantsa Brachveli; Gvantsa Chanturia; Irma Burjanadze; Ketevan Sidamnidze; Khatuna Zakhashvili; Lela Sabadze; Lela Urushadze; Magda Dgebuadze; Maia Alkhashvili; Mari Gavashelidze; Mariam Zakalashvili; Marine Murtskhaladze; Meri Pantsulaia; Nato Kotaria; Nino Berishvili; Nino Khikhvani; Paata Imnadze; Roena Sukhishvili; Tamar Jashishvili; Tata Imnadze; Tea Tevdoridze |
| EPI_ISL_507442, EPI_ISL_516205, EPI_ISL_1158158, EPI_ISL_1289520                                                                                                                                                                                                                                | Michigan Department of Health and Human Services, Bureau of Laboratories                                    | Michigan Department of Health and Human Services, Bureau of Laboratories                                                                                                                | Blankenship HM; Riner D; Soehnlén MK                                                                                                                                                                                                                                                                                                                                                                                                                                                                                                                                                                                                   |
| EPI_ISL_2136925                                                                                                                                                                                                                                                                                 | Microbiologia CATLAB                                                                                        | Can Ruti SARS-CoV-2 Sequencing Hub (HUGTIP/IrsiCaixa/IGTP)                                                                                                                              | Alba Sánchez; Anna Not; Antoni E Bordoy; Bonaventura Clotet; Cristina Casañ; Cristina Esteban; Francesc Catala-Moll; Gemma Clara; Ignacio Blanco; Marc Noguera-Julian; María Casadellá; Mariona Pareira; Mercedes Guerrero; Montserrat Giménez; Pere-Joan Cardona; Pilar Armengol; Roger Paredes; Verónica Saludes; and Elisa Martró on behalf of the Can Ruti SARS-CoV-2 Sequencing Hub.                                                                                                                                                                                                                                              |
| EPI_ISL_520003, EPI_ISL_520024, EPI_ISL_561713, EPI_ISL_562724, EPI_ISL_564666, EPI_ISL_565786, EPI_ISL_591972, EPI_ISL_640872, EPI_ISL_641094, EPI_ISL_1033145, EPI_ISL_1033146, EPI_ISL_1033156, EPI_ISL_1033157, EPI_ISL_1249986, EPI_ISL_1249999, EPI_ISL_1250002, EPI_ISL_1250005,         |                                                                                                             |                                                                                                                                                                                         |                                                                                                                                                                                                                                                                                                                                                                                                                                                                                                                                                                                                                                        |

|                                                                                                                                                                                                                                                                                                                                                                                                                        |           |                                                                                                                                                                                                                |                                                                                                                                                                                  |                                                                                                                                                                                                                                                                                                                                                                                                                                                                                                                                                                                                                                                          |
|------------------------------------------------------------------------------------------------------------------------------------------------------------------------------------------------------------------------------------------------------------------------------------------------------------------------------------------------------------------------------------------------------------------------|-----------|----------------------------------------------------------------------------------------------------------------------------------------------------------------------------------------------------------------|----------------------------------------------------------------------------------------------------------------------------------------------------------------------------------|----------------------------------------------------------------------------------------------------------------------------------------------------------------------------------------------------------------------------------------------------------------------------------------------------------------------------------------------------------------------------------------------------------------------------------------------------------------------------------------------------------------------------------------------------------------------------------------------------------------------------------------------------------|
| EPI_ISL_1913108, EPI_ISL_1913109, EPI_ISL_1913110                                                                                                                                                                                                                                                                                                                                                                      | see above | Microbiological Diagnostic Unit - Public Health Laboratory (MDU-PHL)                                                                                                                                           | MDU-PHL                                                                                                                                                                          | M. B.; M.L.; N.L.; Sait; Sait, M.; Schultz; Schultz M.; Schultz M. B.; Schultz M.B.; Seemann T.; Seemann, T.; Sherry; Sherry, N.                                                                                                                                                                                                                                                                                                                                                                                                                                                                                                                         |
| EPI_ISL_2136871                                                                                                                                                                                                                                                                                                                                                                                                        |           | Microbiology Department, Laboratori Clínic Metropolitana Nord. Hospital Universitari Germans Trias i Pujol                                                                                                     | Can Ruti SARS-CoV-2 Sequencing Hub (HUGTIP/IRSI/CAIXA/IGTP)                                                                                                                      | Alba Sánchez; Anna Not; Antoni E Bordoy; Bonaventura Clotet; Cristina Casaña; Cristina Esteban; Francesc Catala-Moll; Gemma Clara; Ignacio Blanco; Marc Noguera-Julian; Maria Casadella; Mariona Pareira; Mercedes Guerrero; Montserrat Giménez; Pere-Joan Cardona; Pilar Armengol; Roger Paredes; Verónica Saludes; and Elisa Martró on behalf of the Can Ruti SARS-CoV-2 Sequencing Hub.                                                                                                                                                                                                                                                               |
| EPI_ISL_2132030, EPI_ISL_2132221, EPI_ISL_2132223                                                                                                                                                                                                                                                                                                                                                                      |           | Microbiology Department, Lu'an Center for Disease Control and Prevention                                                                                                                                       | Microbiology Department, Lu'an Center for Disease Control and Prevention                                                                                                         | Chang Hongwei; Chen Beilei; Chen Zhichao; Fan Yuzhen.; Gao Dawei; Li Zhaoyang; Yang Wei; Zhang Feng; Zhang Limei; Zhang Qin; Zhu Rui                                                                                                                                                                                                                                                                                                                                                                                                                                                                                                                     |
| EPI_ISL_447306                                                                                                                                                                                                                                                                                                                                                                                                         |           | Microbiology Division, Barzilai University Medical Center                                                                                                                                                      | Stern Lab                                                                                                                                                                        | Stern Lab                                                                                                                                                                                                                                                                                                                                                                                                                                                                                                                                                                                                                                                |
| EPI_ISL_538420                                                                                                                                                                                                                                                                                                                                                                                                         |           | Microbiology Division, South Carolina Department of Health and Environmental Control                                                                                                                           | Microbiology Division, South Carolina Department of Health and Environmental Control                                                                                             | Flores, H.                                                                                                                                                                                                                                                                                                                                                                                                                                                                                                                                                                                                                                               |
| EPI_ISL_1069200, EPI_ISL_1081311                                                                                                                                                                                                                                                                                                                                                                                       |           | Microbiology Laboratory, Lu'an Center for Disease Control and Prevention                                                                                                                                       | Microbiology Laboratory, Lu'an Center for Disease Control and Prevention                                                                                                         | Chang Hongwei; Chen Beilei; Chen Zhichao; Gao Dawei; Li Zhaoyang; Yang Wei; Zhang Feng; Zhang Limei; Zhang Qin; Zhu Rui                                                                                                                                                                                                                                                                                                                                                                                                                                                                                                                                  |
| EPI_ISL_548011, EPI_ISL_548113, EPI_ISL_548130, EPI_ISL_548132, EPI_ISL_548145, EPI_ISL_707807, EPI_ISL_1016850, EPI_ISL_1016852, EPI_ISL_1016855, EPI_ISL_1016870, EPI_ISL_1082262, EPI_ISL_1250697, EPI_ISL_1315311, EPI_ISL_1315318, EPI_ISL_1469092, EPI_ISL_1621293, EPI_ISL_1621311, EPI_ISL_1904848, EPI_ISL_1967893                                                                                            | see above | Middlemore Hospital                                                                                                                                                                                            | Institute of Environmental Science and Research (ESR)                                                                                                                            | Anja Werno; Antje van der Linden; Arlo Upton; Chris Mansell; David Hammer; Dragana Drinkovic; Erasmus Smit; Gary McAuliffe; Hana Sofia Andersson; Hermes Perez; James Ussher; Jill Sherwood; Jing Wang; Joep de Lig; Josh Freeman; Julia Howard; Juliet Elvy; Lauren Jelly; Mary DeAlmeida; Matt Blakiston; Matt Storey; Matthew Rogers; Max Bloomfield; Michael Addidle; Michelle Balm; Muhammad Faisal; Nikki Freed; Olin Slander; Olivia Stroeven; Rachel Boyle; Sally Roberts; SallyAnn Harbison; Sarah Jefferies; Sharmini Muttaiyah; Susan Morpeth; Susan Taylor; Timothy Blackmore; Vani Sathyendran; Veronica Playle; Virginia Hope; Xiaoyun Ren |
| EPI_ISL_718184                                                                                                                                                                                                                                                                                                                                                                                                         |           | Ministry of Health Hospitals                                                                                                                                                                                   | Institute of Health and Community Medicine                                                                                                                                       | Chan Chia Jui; Chua Hock Hin; David Perera; Ooi Mong How; Tonnii Sia Loong Loong; Wong Jyn Shan; Wong Kiing Aik                                                                                                                                                                                                                                                                                                                                                                                                                                                                                                                                          |
| EPI_ISL_812773, EPI_ISL_935065, EPI_ISL_1008642, EPI_ISL_1020472, EPI_ISL_1095568, EPI_ISL_1096057, EPI_ISL_1170108, EPI_ISL_1196145, EPI_ISL_1293257, EPI_ISL_1534523, EPI_ISL_1790193, EPI_ISL_2157872, EPI_ISL_2158030, EPI_ISL_2158034, EPI_ISL_2158049, EPI_ISL_2158051, EPI_ISL_2158060, EPI_ISL_2158065, EPI_ISL_2232624, EPI_ISL_2232628, EPI_ISL_2232662, EPI_ISL_2232694                                     | see above | Ministry of Health Turkey                                                                                                                                                                                      | Ministry of Health Turkey                                                                                                                                                        | Aye Baak Alta; Fatma Bayraktar; Gulay Korukluoglu; Gülay Korukluolu; Suleyman Yalcin; Süleyman Yalcin; Yasemin Cosgun; Yasemin Cogun                                                                                                                                                                                                                                                                                                                                                                                                                                                                                                                     |
| EPI_ISL_1712675, EPI_ISL_1712677, EPI_ISL_1712700, EPI_ISL_1712724, EPI_ISL_1712776, EPI_ISL_1712962, EPI_ISL_1713062, EPI_ISL_1713215, EPI_ISL_1713220, EPI_ISL_1713328, EPI_ISL_1713340, EPI_ISL_1713356, EPI_ISL_1713503, EPI_ISL_1713555, EPI_ISL_1713557, EPI_ISL_1713558, EPI_ISL_1713559, EPI_ISL_1713575, EPI_ISL_1713691, EPI_ISL_1713722, EPI_ISL_1713814, EPI_ISL_1713858, EPI_ISL_1713892, EPI_ISL_1713908 | see above | Ministry of Public Health / Hamad Medical Corporation                                                                                                                                                          | Biomedical Research Center (BRC), Qatar University / Qatar Genome Project (QGP)                                                                                                  | Asmaa A. Al-Thani. MOPH and HMC: Abdullatif Al-Khal; BRC: Fatiha M. Benslimane; Chadi Saad; Dana Al-Batesh; Dina Elgakhlab QGP: Fatima H. Al-Kuwari; Einas A. E. Al-Kuwari; Hadi M. Yassine; Hamad E. Al-Romaihi; Hamda Alromaihi; Heba A. Al-Khatib; Mashael A. Al-Bader; Mohammed Al-Thani; Muna A. S. Al-Maslmani; Oal Al-Jamal; Peter V. Coyle; Reham A. El-Kahlout. QBB: Tasneem Al-Hamad; Roberto Bertolini; Salih Al-Marri                                                                                                                                                                                                                        |
| EPI_ISL_1714074, EPI_ISL_1714467                                                                                                                                                                                                                                                                                                                                                                                       |           | Ministry of Public Health / Hamad Medical Corporation                                                                                                                                                          | Weill Cornell Medical College - Qatar (WCM-Q), Genomics Core Laboratory / Qatar Genome Project (QGP)                                                                             | Chadi Saad MOPH and HMC: Abdullatif Al-Khal; Dina Elgakhlab; Einas A. E. Al-Kuwari; Hamad E. Al-Romaihi; Hamda Alromaihi; Joel A Malek. QGP: Fatima H. Al-Kuwari; Laith Abu-Raddad; Mashael A. Al-Bader; Meryem Bensaad; Mohammed Al-Thani; Muna A. S. Al-Maslmani; Peter V. Coyle; Reham A. El-Kahlout. QBB: Tasneem Al-Hamad; Roberto Bertolini; Salih Al-Marri; Shameem Younusunji; WCMQ: Ayeda A. Ahmed; Yasmin Mohamoud                                                                                                                                                                                                                             |
| EPI_ISL_1578537                                                                                                                                                                                                                                                                                                                                                                                                        |           | Minnesota Department of Health, Public Health Laboratory                                                                                                                                                       | Minnesota Department of Health, Public Health Laboratory                                                                                                                         | Alexandra Lorentz; Jacob Garfin; Matt Plumb; and Xiong Wang                                                                                                                                                                                                                                                                                                                                                                                                                                                                                                                                                                                              |
| EPI_ISL_435137                                                                                                                                                                                                                                                                                                                                                                                                         |           | Mohammed Bin Rashid University of Medicine and Health Sciences                                                                                                                                                 | Al Jailia Genomics Center                                                                                                                                                        | Abdulmajeed Alkhaja; Abiola Catherine Senok; Ahmad Abou Tayoun; Alawi Alsheikh-Ali; Divinlal Harilal; Hamda Khansaheb; Hanan Al Suwaidi; Mohammed Uddin; Norbert Nowotny; Quayba Hamid; Rabih Halwani; Rifat Hamoudi; Rupa Kunder Varhese; Sathishkannan Ramaswamy; Tom Loney; Zulfa Omar Deesi                                                                                                                                                                                                                                                                                                                                                          |
| EPI_ISL_2101097, EPI_ISL_2101121                                                                                                                                                                                                                                                                                                                                                                                       |           | Molecular Biology Laboratory, Faculty Medicine and Health Sciences, Warmadewa University                                                                                                                       | Eijkman Institute for Molecular Biology, National Agency for Research and Innovation; Molecular Biology Laboratory, Faculty Medicine and Health Sciences, Warmadewa University   | Amin Soebandrio; Edison Johar; Ery Sintya; Frilasisa A Yudhaputri; Hidayat Trimarsanto; Iskandar Adnan; Khin Saw Myint; Lidwina Priliani; Lydia V. Panggalo; Muhammad Rezki Rasyak; Safarina G Malik; Sri Masyeni; Sukma Oktavianthi; Willy Agustine                                                                                                                                                                                                                                                                                                                                                                                                     |
| EPI_ISL_2006673, EPI_ISL_2101356, EPI_ISL_2102029, EPI_ISL_2105932, EPI_ISL_2105992, EPI_ISL_2107816                                                                                                                                                                                                                                                                                                                   |           | Molecular Diagnostics Pathology Department Mater Dei Hospital Malta                                                                                                                                            | Molecular Diagnostics Pathology Department Mater Dei Hospital Malta                                                                                                              | C Cilia; G Zahra; L Grech; R Borg                                                                                                                                                                                                                                                                                                                                                                                                                                                                                                                                                                                                                        |
| EPI_ISL_895758                                                                                                                                                                                                                                                                                                                                                                                                         |           | Molecular biology division, Institute of Clinical Biochemistry and Diagnostics, Charles University, Faculty of Medicine in Hradec Králové and University Hospital Hradec Králové                               | Molecular biology division, Institute of Clinical Biochemistry and Diagnostics, Charles University, Faculty of Medicine in Hradec Králové and University Hospital Hradec Králové | Helena Kovaříková; Ivana Baranová; Jitka Novotná; Kateina Hrochová; Kateina Pehlíková; Petr Brož; Tereza Baková; Vladimír Palika. Cooperation project with BioVendor-R&D and bioinformatics company BIOXSYS s r.o.                                                                                                                                                                                                                                                                                                                                                                                                                                       |
| EPI_ISL_2031920, EPI_ISL_2031957, EPI_ISL_2031976                                                                                                                                                                                                                                                                                                                                                                      |           | Molecular diagnostic laboratory of Federal Budget Institution of Science "Central Research Institute of Epidemiology" of The Federal Service on Customers' Rights Protection and Human Well-being Surveillance | Group of Genomics and Postgenomic Technologies of Central Research Institute of Epidemiology                                                                                     | Akimkin V.G.; Kaptelova V.V.; Kondrasheva L.Y.; Korneenko E.V.; Nadtoka M.I.; Saenko S.S.; Samojlov A.E.; Shipulina O.Y.; Sinicyan S.O.; Smirnova Y.S.; Speranskaya A.S.; Tivanova E.V.                                                                                                                                                                                                                                                                                                                                                                                                                                                                  |
| EPI_ISL_1365023, EPI_ISL_1365028, EPI_ISL_1365033, EPI_ISL_1367677, EPI_ISL_1367683, EPI_ISL_1367689, EPI_ISL_1367695, EPI_ISL_1367698, EPI_ISL_1367702, EPI_ISL_1663650, EPI_ISL_1663671, EPI_ISL_1663674, EPI_ISL_1663677, EPI_ISL_1663678, EPI_ISL_1663679, EPI_ISL_1663680                                                                                                                                         | see above | Molecular diagnostic unit for viral haemorrhagic fevers and emerging viruses, Bouaké CHU Laboratory                                                                                                            | Molecular diagnostic unit for viral haemorrhagic fevers and emerging viruses, Bouaké CHU Laboratory                                                                              | Adjaratou Traoré; Bamba Fatoumata Touré; Chantal Akoua-Koffi; Coulibaly Mbegan; Diané Bamourou; Essia Belarbi; Etilé Anoch; Fabian Leendertz; Grit Schubert; Kra Ouffoué; Monemo Pacome; Oby Wayoro; Safiatou Karidioula; Soundélé Maité                                                                                                                                                                                                                                                                                                                                                                                                                 |
| EPI_ISL_614352, EPI_ISL_614372, EPI_ISL_614391, EPI_ISL_614393, EPI_ISL_681834                                                                                                                                                                                                                                                                                                                                         |           | Molecular diagnostic unit for viral haemorrhagic fevers and emerging viruses, Bouaké CHU Laboratory                                                                                                            | Project group Epidemiology of Highly Pathogenic Microorganisms, Robert Koch-Institute                                                                                            | Adjaratou Traoré; Bamba Fatoumata Touré; Chantal Akoua-Koffi; Coulibaly Mbegan; Diané Bamourou; Essia Belarbi; Etilé Anoch; Fabian Leendertz; Grit Schubert; Kra Ouffoué; Monemo Pacome; Safiatou Karidioula; Soundélé Maité                                                                                                                                                                                                                                                                                                                                                                                                                             |
| EPI_ISL_1549727                                                                                                                                                                                                                                                                                                                                                                                                        |           | Montana Public Health Laboratory                                                                                                                                                                               | Montana Public Health Laboratory                                                                                                                                                 | Carrie Biskupiak; Deborah Gibson; Joy Ritter; Michelle Mozer                                                                                                                                                                                                                                                                                                                                                                                                                                                                                                                                                                                             |
| EPI_ISL_888673                                                                                                                                                                                                                                                                                                                                                                                                         |           | Montana Public Health Laboratory                                                                                                                                                                               | Wyoming Public Health Laboratory                                                                                                                                                 | Ashley Norberg; Bailey Bowcutt; Channing Weber; Deborah Gibson; Joy Ritter; Lynette Gumbleton; Noah Hull; Taylor Fearing; Wanda Manley                                                                                                                                                                                                                                                                                                                                                                                                                                                                                                                   |
| EPI_ISL_889365, EPI_ISL_1391368                                                                                                                                                                                                                                                                                                                                                                                        |           | Motol University Hospital                                                                                                                                                                                      | Institute of Applied Biotechnologies a.s.                                                                                                                                        | Kateina Kvapilová; Martin Kašný; Ondej Brzco; Pavel Devínek; Petr Klempř; Petr Kvapil                                                                                                                                                                                                                                                                                                                                                                                                                                                                                                                                                                    |
| EPI_ISL_1591088, EPI_ISL_1591090, EPI_ISL_1591091, EPI_ISL_1591093, EPI_ISL_1591094, EPI_ISL_1591095, EPI_ISL_1591097, EPI_ISL_1593727, EPI_ISL_1593728                                                                                                                                                                                                                                                                | see above | NAMRU-6                                                                                                                                                                                                        | Pathogen Discovery, Respiratory Viruses Branch, Division of Viral Diseases, Centers for Disease Control and Prevention                                                           | Adam Retchless; Anna Kelleher; Anna Montmayeur; Anna Uehara; Brian Lynch; Clinton R. Paden; Haibin Wang; Han Jia Justin Ng; Jing Zhang; Justin Lee; Krista Queen; Mark Burroughs; Peter Cook; Rachel Marine; Suxiang Tong; Yan Li; Ying Tao                                                                                                                                                                                                                                                                                                                                                                                                              |
| EPI_ISL_1588063                                                                                                                                                                                                                                                                                                                                                                                                        |           | NB-Hôpital Georges L. Dumont                                                                                                                                                                                   | National Microbiology Laboratory (NML)                                                                                                                                           | Anna Majer; Anneliese Landgraff; CanCOGeN's metadata curation team; Darian Hole; Elsie Grudeski; Gary Van Domselaar; Grace Seo; Guillaume Desnoyers; Jennifer Tanner; Kirsten Biggar; Madison Chapel; Morag Graham; Natalie Knox; Nathalie Bastien; Philip Mabon; Public Health Agency of Canada CanCOGeN team; Rhiannon Huzarewicz; Richard Garceau; Russell Mandes; Shari Tyson; Timothy Booth; Yan Li                                                                                                                                                                                                                                                 |
| EPI_ISL_2133087                                                                                                                                                                                                                                                                                                                                                                                                        |           | NCDC                                                                                                                                                                                                           | National Reference Laboratory, Nigeria Centre for Disease Control                                                                                                                | Anthony Ahumibe; Catherine Okoi; Chimaobi Chukwu; Dr Chikwe Ihekweazu; Dr Ndodo Nnaemeka; Dr Omoare Adesuyi; Grace Esebanmen; Kingsley Maduikwe; Naidoo Dhamari; Nwando Mba; Olusola Anuoluwapo Akanbi                                                                                                                                                                                                                                                                                                                                                                                                                                                   |
| EPI_ISL_420791                                                                                                                                                                                                                                                                                                                                                                                                         |           | NH Department of Health and Human Services Public Health Labs                                                                                                                                                  | Pathogen Discovery, Respiratory Viruses Branch, Division of Viral Diseases, Centers for Disease Control and Prevention                                                           | Alison S. Laufer Halpin; Anne Uehara; Christopher A. Elkins; Clinton R. Paden; Haibin Wang; Jasmine Padilla; Jing Zhang; Justin Lee; Krista Queen; Mary S. Keckler; Rachel Marine; Suxiang Tong; Yan Li; Ying Tao                                                                                                                                                                                                                                                                                                                                                                                                                                        |
| EPI_ISL_424877                                                                                                                                                                                                                                                                                                                                                                                                         |           | NH Dept. of Health and Human Services Public Health Labs                                                                                                                                                       | Pathogen Discovery, Respiratory Viruses Branch, Division of Viral Diseases, Centers for Disease Control and Prevention                                                           | Alison S. Laufer Halpin; Anna Uehara; Christopher A. Elkins; Clinton R. Paden; Haibin Wang; Jing Zhang; Krista Queen; Mary S. Keckler; Rachel Marine; Suxiang Tong; Yan Li; Ying Tao                                                                                                                                                                                                                                                                                                                                                                                                                                                                     |
| EPI_ISL_2162310, EPI_ISL_2162328,                                                                                                                                                                                                                                                                                                                                                                                      |           | NHLS Universitas Academic                                                                                                                                                                                      | UFS Virology                                                                                                                                                                     | D Goedhals; Emmanuel Ogunbayo; MM Nyaga; MT Mogotsi; P Nthiga; PA Bester; T de Oliveira                                                                                                                                                                                                                                                                                                                                                                                                                                                                                                                                                                  |

|                                                                                                                                                                                                                                                               |                                                                                                                 |                                                                                                                  |                                                                                                                                                                                                                                                                                                                                                                                                                                                                                                                                                                                                                                                                                                                                                                                                                                                                                                                                                                                                                                                                                                                                                                                                                                                                                                                                                                                                                                                                                                                                                                                                                       |                                                                                                                                                                                                                                          |
|---------------------------------------------------------------------------------------------------------------------------------------------------------------------------------------------------------------------------------------------------------------|-----------------------------------------------------------------------------------------------------------------|------------------------------------------------------------------------------------------------------------------|-----------------------------------------------------------------------------------------------------------------------------------------------------------------------------------------------------------------------------------------------------------------------------------------------------------------------------------------------------------------------------------------------------------------------------------------------------------------------------------------------------------------------------------------------------------------------------------------------------------------------------------------------------------------------------------------------------------------------------------------------------------------------------------------------------------------------------------------------------------------------------------------------------------------------------------------------------------------------------------------------------------------------------------------------------------------------------------------------------------------------------------------------------------------------------------------------------------------------------------------------------------------------------------------------------------------------------------------------------------------------------------------------------------------------------------------------------------------------------------------------------------------------------------------------------------------------------------------------------------------------|------------------------------------------------------------------------------------------------------------------------------------------------------------------------------------------------------------------------------------------|
| EPI_ISL_2162363                                                                                                                                                                                                                                               |                                                                                                                 |                                                                                                                  |                                                                                                                                                                                                                                                                                                                                                                                                                                                                                                                                                                                                                                                                                                                                                                                                                                                                                                                                                                                                                                                                                                                                                                                                                                                                                                                                                                                                                                                                                                                                                                                                                       |                                                                                                                                                                                                                                          |
| EPI_ISL_509368, EPI_ISL_602672                                                                                                                                                                                                                                | NHLS-IALCH                                                                                                      | KRISP, KZN Research Innovation and Sequencing Platform                                                           | Giandhari J; Khan S; Lessells R; Mdlalose K; Pillay S; Tegally H; Wilkinson E; York D; de Oliveira T                                                                                                                                                                                                                                                                                                                                                                                                                                                                                                                                                                                                                                                                                                                                                                                                                                                                                                                                                                                                                                                                                                                                                                                                                                                                                                                                                                                                                                                                                                                  |                                                                                                                                                                                                                                          |
| EPI_ISL_860615                                                                                                                                                                                                                                                | NHLS-IALCH                                                                                                      | KRISP, KZn Research Innovation and Sequencing Platform                                                           | Giandhari J; Khan S; Lessells R; Mdlalose K; Pillay S; Tegally H; Wilkinson E; York D; de Oliveira T                                                                                                                                                                                                                                                                                                                                                                                                                                                                                                                                                                                                                                                                                                                                                                                                                                                                                                                                                                                                                                                                                                                                                                                                                                                                                                                                                                                                                                                                                                                  |                                                                                                                                                                                                                                          |
| EPI_ISL_1587897, EPI_ISL_2161801, EPI_ISL_2161806, EPI_ISL_2161808                                                                                                                                                                                            | NL-Dr. Leonard A. Miller Centre for Health Services                                                             | National Microbiology Laboratory (NML)                                                                           | Adel Malek; Anna Majer; Anneliese Landgraaf; CanCOGeN's metadata curation team; Darian Hole; Elsie Grudeski; Gary Van Domselaar; George Zahariadis; Grace Seo; Jennifer Tanner; Kerri Smith; Kirsten Biggar; Laura Gilbert; Madison Chapel; Morag Graham; Natalie Knox; Nathalie Bastien; Philip Mabon; Public Health Agency of Canada CanCOGeN team; Rhiannon Huzarewicz; Robert Needle; Russell Mandes; Shari Tyson; Timothy Booth; Yan Li; Yang Yu                                                                                                                                                                                                                                                                                                                                                                                                                                                                                                                                                                                                                                                                                                                                                                                                                                                                                                                                                                                                                                                                                                                                                                 |                                                                                                                                                                                                                                          |
| EPI_ISL_422399                                                                                                                                                                                                                                                | NMIMR, Department of Virology                                                                                   | WACCBIP, University of Ghana                                                                                     | Abraham Kwabena Anang; Augustina Arjarquah; Bright Adu; Collins M. Morang'a; Dominic S. Y. Amuzu; Erasmus Kotej; Evelyn Bonnes; Fred Tei-Maya; George B. Kyei; Gordon A. Awandare; Ivy Asante; Joyce M. Ngoi; Kofi Bonney; Linda Boatemaa; Miriam Eshum; Peter Quashie; Selassie Kumordjia; Vanessa Magnusson; William Ampofo                                                                                                                                                                                                                                                                                                                                                                                                                                                                                                                                                                                                                                                                                                                                                                                                                                                                                                                                                                                                                                                                                                                                                                                                                                                                                         |                                                                                                                                                                                                                                          |
| EPI_ISL_1580193, EPI_ISL_1654922                                                                                                                                                                                                                              | NMVRVI                                                                                                          | National Public Health Surveillance Laboratory                                                                   | Ana Steponkiene; Danas Baksa; Jelena Razmuk; Lukas Vasionis; Migle Gabrielaite; Svajune Muralyte                                                                                                                                                                                                                                                                                                                                                                                                                                                                                                                                                                                                                                                                                                                                                                                                                                                                                                                                                                                                                                                                                                                                                                                                                                                                                                                                                                                                                                                                                                                      |                                                                                                                                                                                                                                          |
| EPI_ISL_416742                                                                                                                                                                                                                                                | NRL for Influenza, Centrum Epidemiology and Microbiology of National Institute of Public Health, Czech Republic | Charite Universitaetsmedizin Berlin, Institute of Virology                                                       | Akexander Nagy; Barbara Muehleemann; Christian Drosten; Dusan Trnka; Helena Jirincova; Jaromira Vecerova; Jorn Beheim-Schwarzbach; Julia Schneider; Ludmila Novakova; Talitha Veith; Terry Jones; Victor M Corman                                                                                                                                                                                                                                                                                                                                                                                                                                                                                                                                                                                                                                                                                                                                                                                                                                                                                                                                                                                                                                                                                                                                                                                                                                                                                                                                                                                                     |                                                                                                                                                                                                                                          |
| EPI_ISL_1272391, EPI_ISL_1666932, EPI_ISL_2162078                                                                                                                                                                                                             | NS-QEII Health Sciences Centre                                                                                  | National Microbiology Laboratory (NML)                                                                           | Anna Majer; Anneliese Landgraaf; CanCOGeN's metadata curation team; Dan Gaston; Darian Hole; Elsie Grudeski; Gary Van Domselaar; Grace Seo; Janice Pettipas; Jason LeBlanc; Jennifer Tanner; Kirsten Biggar; Madison Chapel; Morag Graham; Natalie Knox; Nathalie Bastien; Philip Mabon; Public Health Agency of Canada CanCOGeN team; Rhiannon Huzarewicz; Russell Mandes; Shari Tyson; Timothy Booth; Todd Hatchette; Yan Li                                                                                                                                                                                                                                                                                                                                                                                                                                                                                                                                                                                                                                                                                                                                                                                                                                                                                                                                                                                                                                                                                                                                                                                        |                                                                                                                                                                                                                                          |
| EPI_ISL_940777                                                                                                                                                                                                                                                | NSPI-CRN de Influenza y otros virus respiratorios                                                               | INSPI-Centro de Investigación Multidisciplinaria de la DTIDI                                                     | Alberto Orlando.; Alfredo Bruno; Andrés Carrasco-Montalvo; Doménica de Mora; Leandro Patiño; Manuel González; Maritza Olmedo; Mary Regato-Arrata; Melissa Zambrano; Orson Mestanza                                                                                                                                                                                                                                                                                                                                                                                                                                                                                                                                                                                                                                                                                                                                                                                                                                                                                                                                                                                                                                                                                                                                                                                                                                                                                                                                                                                                                                    |                                                                                                                                                                                                                                          |
| EPI_ISL_1966564                                                                                                                                                                                                                                               | NUCLEO DE SAUDE VILA FALCAO DE BAURU                                                                            | Instituto Butantan / Mendelics                                                                                   | Antonio Jorge Martins; Bianca Cechetto Carlos. Mendelics: Bibiana Santos; Claudia Renata dos Santos Barros; Cintia Bittar; David Schlesinger. Hemocentro Ribeirão Preto: Simone Kashima; Debora Botequiu Moretti; Elaine Cristina Marquize; Elaine Vieira dos Santos; Elisangela Chicaroni Mattos; Erika Freitas; Evandra Strazza Rodrigues; Felipe Allan da Silva da Costa; Flavia Aburjaile; Fábio Sossai Possebon; Guilherme Campos; Guilherme Targino Valente; Heidge Fukumasu. USP-Botucatu: Rejane Maria Tommasini Grotto; Helena Lage Ferreira; Instituto Butantan: Dimas Tadeu Covas; Jardelina de Souza Todao Bernardino; Jayme A. Souza-Neto; Jessika Cristina Chagas Lesbon; Jorge A. Petrolli Marchesi; José Salvatore Leister Patané; João Paulo Kitajima; João Pessoa Araújo Jr.; Leila Sabrina Ullmann; Loyze Paola Oliveira de Lima; Luiz Aurelio de Campos Crispin. Centro de Genômica Funcional da ESALQ: Luiz Lehmann Coutinho; Luiz Carlos Junior de Alcantara; Lívia Sacchetto; Maisa C. Pereira Parra; Maria Carolina Elias; Marta Giovanetti; Marília Moraes; Maurício Lacerda Nogueira. Prefeitura de Sao Paulo: Melissa Palmieri.; Patricia Akemi Assato; Paula Rahal; Paulo Inacio da Costa; Rafael dos Santos Bezerra; Raquel de Lello Rocha Campos Cassano. NGS Soluções Genômicas: Pilar Drummond Sampaio Corrêa Mariani. FZEA-USP Pirassununga: Mirele Daiana Poleti; Raul Machado Neto; Ricardo Augusto Brassalotti; Ricardo Haddad; Rodrigo Tocantins Calado. FAMERP-SJRP: Cecília Artico Banho; Sandra Coccuzzo Sampaio; Svetoslav Nanev Slavov; Vagner Fonseca; Vincent Louis Viala |                                                                                                                                                                                                                                          |
| EPI_ISL_1657249                                                                                                                                                                                                                                               | NVSPL                                                                                                           | National Public Health Surveillance Laboratory                                                                   | Ana Steponkiene; Danas Baksa; Jelena Razmuk; Lukas Vasionis; Lukas Zemaits; Migle Gabrielaite; Svajune Muralyte                                                                                                                                                                                                                                                                                                                                                                                                                                                                                                                                                                                                                                                                                                                                                                                                                                                                                                                                                                                                                                                                                                                                                                                                                                                                                                                                                                                                                                                                                                       |                                                                                                                                                                                                                                          |
| EPI_ISL_1060634                                                                                                                                                                                                                                               | NYU Langone Health                                                                                              | Departments of Pathology and Medicine, New York University School of Medicine                                    | Adriana Heguy; Christian Marier; Dacia Dimartino; Emily Guzman; Gael Westby; Guiqing Wang; Paolo Cotzia; Paul Zappile; Peter Meyn; Sitharam Ramaswami; Yutong Zhang                                                                                                                                                                                                                                                                                                                                                                                                                                                                                                                                                                                                                                                                                                                                                                                                                                                                                                                                                                                                                                                                                                                                                                                                                                                                                                                                                                                                                                                   |                                                                                                                                                                                                                                          |
| EPI_ISL_452235                                                                                                                                                                                                                                                | Narhalsan Backa vardcentral                                                                                     | The Public Health Agency of Sweden                                                                               | Anna Risberg; Anna-Malin Linde; Karin Tegmark-Wisell; Maria Lind Karlberg; Mats Olsson; Mia Brytting; Olov Svartstrom; Oskar Karlsson Lindsjo; Theresa Enkirsch                                                                                                                                                                                                                                                                                                                                                                                                                                                                                                                                                                                                                                                                                                                                                                                                                                                                                                                                                                                                                                                                                                                                                                                                                                                                                                                                                                                                                                                       |                                                                                                                                                                                                                                          |
| EPI_ISL_1805716, EPI_ISL_1805718, EPI_ISL_1805744, EPI_ISL_1805745, EPI_ISL_1805790, EPI_ISL_1805932, EPI_ISL_1805933, EPI_ISL_1805959, EPI_ISL_1805961, EPI_ISL_1805962                                                                                      | see above                                                                                                       | National Center for Communicable Diseases (NCCD) National Influenza Center                                       | National Center for Communicable Diseases (NCCD) National Influenza Center                                                                                                                                                                                                                                                                                                                                                                                                                                                                                                                                                                                                                                                                                                                                                                                                                                                                                                                                                                                                                                                                                                                                                                                                                                                                                                                                                                                                                                                                                                                                            | Ankhubayar S; Battur L; Bayasgalan N; Darmaa B; Hideka M; Khishigmunkh Ch; Mina N; Naranzul Ts; Nymadawa P; Seichiro F; Shinji W; Tsogzolmaa G                                                                                           |
| EPI_ISL_1233490, EPI_ISL_1233518, EPI_ISL_1233533                                                                                                                                                                                                             | National Center for Infectious and Parasitic Diseases (NCIPD)                                                   | National Center for Infectious and Parasitic Diseases (NCIPD)                                                    |                                                                                                                                                                                                                                                                                                                                                                                                                                                                                                                                                                                                                                                                                                                                                                                                                                                                                                                                                                                                                                                                                                                                                                                                                                                                                                                                                                                                                                                                                                                                                                                                                       | Alexiev et al                                                                                                                                                                                                                            |
| EPI_ISL_1231628, EPI_ISL_1231749                                                                                                                                                                                                                              | National Center for Infectious and Parasitic Diseases (NCIPD)                                                   | National Center for Infectious and Parasitic Diseases (NCIPD)                                                    |                                                                                                                                                                                                                                                                                                                                                                                                                                                                                                                                                                                                                                                                                                                                                                                                                                                                                                                                                                                                                                                                                                                                                                                                                                                                                                                                                                                                                                                                                                                                                                                                                       | Alexiev et al                                                                                                                                                                                                                            |
| EPI_ISL_1139146, EPI_ISL_1139149, EPI_ISL_1139150, EPI_ISL_1139151, EPI_ISL_1139152, EPI_ISL_1718287, EPI_ISL_1718295, EPI_ISL_1718296, EPI_ISL_1718298, EPI_ISL_1718299, EPI_ISL_1718300, EPI_ISL_1718301, EPI_ISL_1718303, EPI_ISL_1718304, EPI_ISL_1718305 | see above                                                                                                       | National Center of Disease Control and Prevention of the Republic of Armenia                                     | Institute of Molecular Biology NAS RA, Republic of Armenia, Department of Bioengineering, Bioinformatics Institute and Molecular Biology IBMPh RAU, Republic of Armenia                                                                                                                                                                                                                                                                                                                                                                                                                                                                                                                                                                                                                                                                                                                                                                                                                                                                                                                                                                                                                                                                                                                                                                                                                                                                                                                                                                                                                                               | Andranik Chavushyan; Arsen Arakelyan; Diana Avetyan; Gayane Melik-Pashayan; Gisane Khachatyan; Hovsep Ghazaryan; Maria Nikoghosyan; Nelli Muradyan; Roksana Zakharyan; Shushan Sargsyan; Siras Hakobyan; Tamara Sirunyan; Zaven Karalyan |
| EPI_ISL_1854634                                                                                                                                                                                                                                               | National Center of Disease Control and Prevention of the Republic of Armenia                                    | UW Virology Lab                                                                                                  | Alexander Greninger; Anahit Hovhannissyan; Andranik Chavushyan; Anna Khazaryan; Arsen Arakelyan; Diana Avetyan; Gisane Khachatyan; Hong Xie; Hovsep Ghazaryan; Keith R. Jerome; Lasata Shrestha; Lyudmila Niazyan; Maria Nikoghosyan; Meei-Li Huang; Michelle Lin; Nelli Muradyan; Pavitra Roychoudhury; Roksana Zakharyan; Shahi Mohamed Bakhsh; Siras Hakobyan; Tamara Sirunyan                                                                                                                                                                                                                                                                                                                                                                                                                                                                                                                                                                                                                                                                                                                                                                                                                                                                                                                                                                                                                                                                                                                                                                                                                                     |                                                                                                                                                                                                                                          |
| EPI_ISL_1302045, EPI_ISL_1401427, EPI_ISL_1786323, EPI_ISL_2081865, EPI_ISL_2081891, EPI_ISL_2081914, EPI_ISL_2081928, EPI_ISL_2180280                                                                                                                        | see above                                                                                                       | National Center of Infectious and Parasitic Diseases                                                             | National Center of Infectious and Parasitic Diseases                                                                                                                                                                                                                                                                                                                                                                                                                                                                                                                                                                                                                                                                                                                                                                                                                                                                                                                                                                                                                                                                                                                                                                                                                                                                                                                                                                                                                                                                                                                                                                  | Alexiev; Alexiev et al; Dimitrova; Dobrinov; Donchev; Grigorova I.; Hristova; Ivanov; Kantardjiev; Korsun; Philipova; Stoitsova; Stoykov; Trifonova                                                                                      |
| EPI_ISL_1415182, EPI_ISL_1415266, EPI_ISL_1415286, EPI_ISL_1415326, EPI_ISL_1415328, EPI_ISL_1415334                                                                                                                                                          | National Centre For Cell Science                                                                                | National Centre For Cell Science - INSACOG                                                                       | Ajay Pillai; Dhraj Paut; INSACOG Consortium team; Manoj Kumar Bhat; Mitali Inamdar; Mohak P Gujare; Shivang P. Bhanushali; Sonal Manik Chavan; Yogesh Shouche.                                                                                                                                                                                                                                                                                                                                                                                                                                                                                                                                                                                                                                                                                                                                                                                                                                                                                                                                                                                                                                                                                                                                                                                                                                                                                                                                                                                                                                                        |                                                                                                                                                                                                                                          |
| EPI_ISL_626627                                                                                                                                                                                                                                                | National Centre for Communicable Disease (NCCD) National Influenza Center                                       | National Centre for Communicable Disease (NCCD) National Influenza Center                                        | Ankhubayar S; Bayasgalan N; Darmaa B; Erden-Ochir Ts; Naranzul Ts; Nyamkhuu D; Nymadawa P Chang-Seon Song                                                                                                                                                                                                                                                                                                                                                                                                                                                                                                                                                                                                                                                                                                                                                                                                                                                                                                                                                                                                                                                                                                                                                                                                                                                                                                                                                                                                                                                                                                             |                                                                                                                                                                                                                                          |
| EPI_ISL_2106795                                                                                                                                                                                                                                               | National Centre for Disease Control                                                                             | CDFD-INSACOG                                                                                                     | Ashwin Dalal; Asmita Gupta; Divya Vashisht; Murali Bashyam; Pratyusha Bala; Vinay Donipadi                                                                                                                                                                                                                                                                                                                                                                                                                                                                                                                                                                                                                                                                                                                                                                                                                                                                                                                                                                                                                                                                                                                                                                                                                                                                                                                                                                                                                                                                                                                            |                                                                                                                                                                                                                                          |
| EPI_ISL_1407098, EPI_ISL_1407129, EPI_ISL_1407140, EPI_ISL_1407147, EPI_ISL_1407149, EPI_ISL_1407201                                                                                                                                                          | National HIV Reference Laboratory, Ministry of Health, Public Health Institute of Malawi                        | KRISP, KZN Research Innovation and Sequencing Platform                                                           | Auld A; Chilima B; Chiwala M; Emmanuel SJ; Giandhari J; Kaba M; Kampira E; Kasambara W; Kim L.; Lessells R; Maida A; Mvula B; Mwagomba W; Naidoo Y; Panja L; Pillay S; Tegally H; Wadonda N; Wilkinson E; de Oliveira T                                                                                                                                                                                                                                                                                                                                                                                                                                                                                                                                                                                                                                                                                                                                                                                                                                                                                                                                                                                                                                                                                                                                                                                                                                                                                                                                                                                               |                                                                                                                                                                                                                                          |
| EPI_ISL_1677706, EPI_ISL_1677716, EPI_ISL_1677718, EPI_ISL_1677721, EPI_ISL_1677733                                                                                                                                                                           | National Health Laboratory                                                                                      | Botswana Institute for Technology Research and Innovation                                                        | Dineo Emang Tshiamo. Tefelo Thela; Gape Nyepetsi; Kefentse Arnold Tumedji; Madisa Mine; Maithwarelo Ignatius Matsheka; Malebogo Keabonye; Thongbotho Mphoyakgosi                                                                                                                                                                                                                                                                                                                                                                                                                                                                                                                                                                                                                                                                                                                                                                                                                                                                                                                                                                                                                                                                                                                                                                                                                                                                                                                                                                                                                                                      |                                                                                                                                                                                                                                          |
| EPI_ISL_1366813, EPI_ISL_1550948, EPI_ISL_1817764, EPI_ISL_1817766, EPI_ISL_1817772, EPI_ISL_1817775, EPI_ISL_2086238                                                                                                                                         | see above                                                                                                       | National Health Laboratory Service, South Africa                                                                 | KRISP, KZN Research Innovation and Sequencing Platform                                                                                                                                                                                                                                                                                                                                                                                                                                                                                                                                                                                                                                                                                                                                                                                                                                                                                                                                                                                                                                                                                                                                                                                                                                                                                                                                                                                                                                                                                                                                                                | Emmanuel SJ; Giandhari J; Khan S; Laguda-Akingba O; Lessells R; Mdlalose K; Naidoo Y; Pillay S; Ramphal U; Tegally H; Wilkinson E; York D; de Oliveira T                                                                                 |
| EPI_ISL_1048540, EPI_ISL_1371995                                                                                                                                                                                                                              | National Health Laboratory Service, South Africa                                                                | KRISP, KZn Research Innovation and Sequencing Platform                                                           | Emmanuel SJ; Giandhari J; Khan S; Lessells R; Maslo C; Mdlalose K; Pillay S; Sitharam L; Tegally H; Wilkinson E; York D; de Oliveira T                                                                                                                                                                                                                                                                                                                                                                                                                                                                                                                                                                                                                                                                                                                                                                                                                                                                                                                                                                                                                                                                                                                                                                                                                                                                                                                                                                                                                                                                                |                                                                                                                                                                                                                                          |
| EPI_ISL_456600, EPI_ISL_456607                                                                                                                                                                                                                                | National Health Laboratory, Timor-Leste                                                                         | Microbiological Diagnostic Unit Public Health Laboratory, The Peter Doherty Institute for Infection and Immunity | Antonia da Costa, E.; Baird, R.; Barreto, I.; Caly, L.; Canisia, D.; Dakh, F.; Dolores de Jesus da Costa, M.; Douglas, N.; Francis, J.; Freeman, K.; Jayanti Pereira Tilman, A.; Marr, I.; Sait, M.; Salles de Sousa, A.; Schultz, M.; Seemann, T.; Sherry, N.; Soares da Silva, E.; Wapling, J.; Ximenes, J.                                                                                                                                                                                                                                                                                                                                                                                                                                                                                                                                                                                                                                                                                                                                                                                                                                                                                                                                                                                                                                                                                                                                                                                                                                                                                                         |                                                                                                                                                                                                                                          |
| EPI_ISL_2161167                                                                                                                                                                                                                                               | National Hematology and Transfusiology Center                                                                   | National Hematology and Transfusiology Center                                                                    | Aghayev AR                                                                                                                                                                                                                                                                                                                                                                                                                                                                                                                                                                                                                                                                                                                                                                                                                                                                                                                                                                                                                                                                                                                                                                                                                                                                                                                                                                                                                                                                                                                                                                                                            |                                                                                                                                                                                                                                          |
| EPI_ISL_455712                                                                                                                                                                                                                                                | National Hospital of Tropical Diseases                                                                          | Oxford University Clinical Research Unit, Hanoi, Vietnam                                                         | H. Rogier van Doorn; Le Nguyen Minh Hoa; Nguyen Thi Ngoc Diep; Nguyen Thi Tam; Nguyen Thu Trang; Pham Ngoc Thach; Van Dinh Trang; on behalf of the OUCRU COVID-19 research group                                                                                                                                                                                                                                                                                                                                                                                                                                                                                                                                                                                                                                                                                                                                                                                                                                                                                                                                                                                                                                                                                                                                                                                                                                                                                                                                                                                                                                      |                                                                                                                                                                                                                                          |

|                                                                                                                                                                                                                      |                                                                                                                                         |                                                                                                                                                                                                  |                                                                                                                                                                                                                                                                                                                                                                                                                                                                                                                                                                                                                                                                                                                                                                                                                                                                                                                                                                                                                                                                        |
|----------------------------------------------------------------------------------------------------------------------------------------------------------------------------------------------------------------------|-----------------------------------------------------------------------------------------------------------------------------------------|--------------------------------------------------------------------------------------------------------------------------------------------------------------------------------------------------|------------------------------------------------------------------------------------------------------------------------------------------------------------------------------------------------------------------------------------------------------------------------------------------------------------------------------------------------------------------------------------------------------------------------------------------------------------------------------------------------------------------------------------------------------------------------------------------------------------------------------------------------------------------------------------------------------------------------------------------------------------------------------------------------------------------------------------------------------------------------------------------------------------------------------------------------------------------------------------------------------------------------------------------------------------------------|
| EPI_ISL_416032                                                                                                                                                                                                       | National Influenza Center - Instituto Adolfo Lutz                                                                                       | Instituto Adolfo Lutz, Interdisciplinary Procedures Center, Strategic Laboratory                                                                                                                 | Adriana Bugno; Adriano Abbud; Carlos Henrique Camargo; Claudia Regina Gonçalves; Claudio Tavares Sacchi; Daniela Bernardes Borges da Silva; Fabiana Cristina Pereira dos Santos; Maria do Carmo Sampaio Tavares Timenetsky; Simone Guadagnucci Morillo; Terezinha Maria de Paiva                                                                                                                                                                                                                                                                                                                                                                                                                                                                                                                                                                                                                                                                                                                                                                                       |
| EPI_ISL_486888                                                                                                                                                                                                       | National Influenza Center, Bahrain                                                                                                      | National Influenza Center, Bahrain                                                                                                                                                               | AlWasti, H.; Altaif, Z.; Shehab, F.; Zaed, A.                                                                                                                                                                                                                                                                                                                                                                                                                                                                                                                                                                                                                                                                                                                                                                                                                                                                                                                                                                                                                          |
| EPI_ISL_416429, EPI_ISL_660541                                                                                                                                                                                       | National Influenza Center, National Institute of Hygiene and Epidemiology (NIHE)                                                        | National Influenza Center, National Institute of Hygiene and Epidemiology (NIHE)                                                                                                                 | Dang Duc Anh; Futoshi Hasebe; Hoang Vu Mai Phuong; Kouichi Morita; Le Quynh Mai; Le Thi Thanh; Meng Ling Moi; Nguyen Le Khanh Hang; Nguyen Phuong Anh; Nguyen Vu Son; Pham Hong Quynh Anh; Pham Thi Hien; Taichiro Takemura; Takeshi Nabeshima; Tran Thu Huong; Ung Thi Hong Trang; Vuong Duc Cuong                                                                                                                                                                                                                                                                                                                                                                                                                                                                                                                                                                                                                                                                                                                                                                    |
| EPI_ISL_862077, EPI_ISL_959276, EPI_ISL_959282, EPI_ISL_1014676, EPI_ISL_1014681, EPI_ISL_1014683, EPI_ISL_1014686, EPI_ISL_1993547, EPI_ISL_1993553                                                                 |                                                                                                                                         |                                                                                                                                                                                                  |                                                                                                                                                                                                                                                                                                                                                                                                                                                                                                                                                                                                                                                                                                                                                                                                                                                                                                                                                                                                                                                                        |
| see above                                                                                                                                                                                                            | National Influenza Center, Virology Department                                                                                          | National Influenza Center                                                                                                                                                                        | A Nejadi; F Ajaminejad; F Ajaminejad and T Mokhtari Azad; J Yavarian; K Sadeghi; N Ghavvami; N Ghavvami and T Mokhtari Azad; NZ Shafiei Jandaghi; V Salimi                                                                                                                                                                                                                                                                                                                                                                                                                                                                                                                                                                                                                                                                                                                                                                                                                                                                                                             |
| EPI_ISL_410301                                                                                                                                                                                                       | National Influenza Centre, National Public Health Laboratory, Kathmandu, Nepal                                                          | The University of Hong Kong                                                                                                                                                                      | Alfonso J. Rodriguez-Morales; Anup Bastola; Basu Dev Pandey; Bibek Kumar Lal; Daniel Chu; Haoguo Gu; Leo Poon; Malik Peiris; Ranjit Sah; Runa Jha                                                                                                                                                                                                                                                                                                                                                                                                                                                                                                                                                                                                                                                                                                                                                                                                                                                                                                                      |
| EPI_ISL_402125                                                                                                                                                                                                       | National Institute for Communicable Disease Control and Prevention (ICDC) Chinese Center for Disease Control and Prevention (China CDC) | National Institute for Communicable Disease Control and Prevention (ICDC) Chinese Center for Disease Control and Prevention (China CDC)                                                          | Chen; Dai; F.-H.; Hu, Y.; J.-J.; J.-L. and Zhu; Liu, Y.; Pei; Q.-M.; She; Song; T.-Y.; Tao; Tian; Wang; Wang, W.; Wu, F.; Xu, L.; Y.-L.; Y.-M.; Y.-Y.; Y.-Z.; Yu, B.; Z.-G.; Z.-W.; Zhang; Zhao, S.; Zheng                                                                                                                                                                                                                                                                                                                                                                                                                                                                                                                                                                                                                                                                                                                                                                                                                                                             |
| EPI_ISL_515167, EPI_ISL_622896                                                                                                                                                                                       | National Institute for Communicable Diseases of the National Health Laboratory Service                                                  | National Institute for Communicable Diseases of the National Health Laboratory Service                                                                                                           | Allam M; Bhiman JN; Ismail A; Khumalo Z; Kwenda S; Mnyameni F; Mohale T; Mtshali P; Subramoney K                                                                                                                                                                                                                                                                                                                                                                                                                                                                                                                                                                                                                                                                                                                                                                                                                                                                                                                                                                       |
| EPI_ISL_1910080                                                                                                                                                                                                      | National Institute for Food and Veterinary Risk Assessment (NMVRVI)                                                                     | National Public Health Surveillance Laboratory                                                                                                                                                   | Ana Steponkiene; Danas Baksa; Jelena Razmuk; Lukas Vasionis; Lukas Zemaitis; Migle Gabrielaite; Svajune Muralyte                                                                                                                                                                                                                                                                                                                                                                                                                                                                                                                                                                                                                                                                                                                                                                                                                                                                                                                                                       |
| EPI_ISL_402121, EPI_ISL_591271, EPI_ISL_591280, EPI_ISL_2170887, EPI_ISL_2170892, EPI_ISL_2170893                                                                                                                    | National Institute for Viral Disease Control and Prevention, China CDC                                                                  | National Institute for Viral Disease Control and Prevention, China CDC                                                                                                                           | & 7; Baoying Huang3; Cao Chen; Cao Chen3& Dayan Wang; Dayan Wang3; Dongyan Wang3; Faxian ZhanWeifeng ShiBaoying HuangJun LiuLi ZhaoYao MengFei YeNa Zhu; Fengjin Li6; George F. Gao; George Fu Gao1; Haibo Sun5; Hong Wang; Hong Wang3; Huilai Ma; Huilai Ma1 & Ji Wang; Ji Wang3& Jian Cai1; Jianqun Zhang2& Jianxing Yu1; Jingdong Song; Jun Han; Jun Meng2; Li Bai6; Li Zhao3; Liang Wang1; Lingling Mao5; Mingchun Luan2; Naijing Mao3; Ning Li6; Peihua Niu3; Qian Yang3; Ruqin Gao; Shaofeng Jiang9; Shihong Yang2; Shuangli Zhu3; Tao Ma1; Tianjiao Ji3; Wei Yao2*; Weimin Zhou; Wenbo Xu; Wenbo Xu3*; Wenjie Tan3; Wenjie TanXuejun MaXiang ZhaoWenling WangYongzhong JiangRoujian LuJi WangPeihua Niu; Wenging Yao5*; Xiang Ren1; Xiang Zhao; Xiang Zhao3; Xiaozhou HePeipei Liu; Yan Zhang3; Yang Lijiang ChenWenbo XuGeorge F. GaoGuizhen Wu; Yang Song3& Yanhai Wang3; Yao Meng; Yecheng Yao11; Ying Qin1& Yingwei Sun5; Yong Zhang; Yong Zhang3; Yuchao Wu; Yunting Xia8; Zhaoguo Wang; Zhen Zhu3; Zhijian Bo2; Zhixiao Chen; Zhongjie Li1; Zijian Feng1* |
| EPI_ISL_708839                                                                                                                                                                                                       | National Institute of Blood Diseases (NIBD), Molecular Biology Lab                                                                      | Genomics Lab NIBD                                                                                                                                                                                | Aneeta Shahni; Arshi Naz; Gul Sufaida; Samina Naz Mukry; Sayed Ali Raza; Shariq Ahmed; Tahir Sultan Shamsi                                                                                                                                                                                                                                                                                                                                                                                                                                                                                                                                                                                                                                                                                                                                                                                                                                                                                                                                                             |
| EPI_ISL_2107098                                                                                                                                                                                                      | National Institute of Health (NIH) - Federal Government of Somalia                                                                      | African Centre of Excellence for Genomics of Infectious Diseases (ACEGID), Redeemer's University                                                                                                 | A.T.; Abechi; Ajogbasile; Akano; C.A.; C.T.; Eromon; F.V.; Folarin, O.; Happi; I.B.; J.N.; J.U.; K.O.; Kayode; Nosamiefan, I.; Oguzie; Olawoye; Olumade; Oluniyi; P.E.; P.S.; T.J.; Ugwu; Uwanibe                                                                                                                                                                                                                                                                                                                                                                                                                                                                                                                                                                                                                                                                                                                                                                                                                                                                      |
| EPI_ISL_538504, EPI_ISL_1915517, EPI_ISL_1915540                                                                                                                                                                     | National Institute of Health Research and Development                                                                                   | National Institute of Health Research and Development                                                                                                                                            | A; AA; Adam; Agustinsingh; Arie Ardiansyah Nugraha; F; Fauzul Muna; Febriyanti; HA; HD; Hana Apsari Pawestri; Hariastuti; Hartanti Dian Ikawati; Herman; Herna; Holy Arif Wibowo; IL; Ikawati; Indalau; Irene Lorinda Indalau; J; K; KD; KNA; Kartika Dewi Puspa; Kindi Adam; Kipuw; Krisna Nur Andriana Pangesti; Kurniawati; M; Muna; Mursinah; N; NI; NK; NL; Natalie Laurencia Kipuw; Nelly Puspandari; Ni Ketut Susilarini; Nike Susanti; Nikmah; Nugraha; Nurhadi; Nurika Hariastuti; Paisal; Pangesti; Pawestri; Puspa; Puspandary; R; Ramadhany; Reni Herman; Rinin Ramadhany; Rizki; Setiawaty, V.; Soekarso; Subangkit; Susanti; Susilarini; T; Tati Febriyanti; Triyani Soekarso; UA; Uly Alfi Nikmah; Vivi Setiawaty.; Wibowo; Yuni Rukminiati                                                                                                                                                                                                                                                                                                             |
| EPI_ISL_979893, EPI_ISL_1116430, EPI_ISL_1116443, EPI_ISL_1116444, EPI_ISL_1279973, EPI_ISL_1279976                                                                                                                  | National Institute of Infectious Diseases-Prof. Dr. Matei Bals Molecular Diagnostics Laboratory                                         | National Institute of Infectious Diseases-Prof. Dr. Matei Bals Molecular Diagnostics Laboratory                                                                                                  | Andreea Tudor; Corina Casangiu; Dan Otelea; Leontina Banica; Marius Surleac; Petre Milu; Simona Paraschiv                                                                                                                                                                                                                                                                                                                                                                                                                                                                                                                                                                                                                                                                                                                                                                                                                                                                                                                                                              |
| EPI_ISL_465163, EPI_ISL_483691, EPI_ISL_603239, EPI_ISL_803852, EPI_ISL_943552, EPI_ISL_959309, EPI_ISL_959374, EPI_ISL_1508950, EPI_ISL_1524802, EPI_ISL_1531556, EPI_ISL_1531776, EPI_ISL_1534618, EPI_ISL_1538409 |                                                                                                                                         |                                                                                                                                                                                                  |                                                                                                                                                                                                                                                                                                                                                                                                                                                                                                                                                                                                                                                                                                                                                                                                                                                                                                                                                                                                                                                                        |
| see above                                                                                                                                                                                                            | National Institute of Laboratory Medicine and Referral Center                                                                           | Genomic Research Lab, BCSIR                                                                                                                                                                      | ; A. K. M. Shamsuzzaman; A. K. M. Shamsuzzaman; Abu Sayeed Mohammad Mahmud; Arifa Akram; Asish Kumar Ghosh; Barna Goswami; Eshrar Osman; Iffat Jahan; Mahmuda Yeasmin; Md. Ahasan Habib; Md. Ahasan Habib; Md. Maruf Ahmed Molla; Md. Masum Hossain Arif; Md. Murshed Hasan Sarkar; Md. Murshed Hasan Sarkar; Md. Saddam Hossain; Md. Salim Khan; Mohammad Mohi Uddin; Mohammad Samir Uzzaman; Monira Parveen; Salek Ahmed Sajib; Shahina Akter; Sheikh Md. Selim Al Din; Tanjina Akhter Banu; Tanjina Akhter Banu; Tanjina Akhter Banu; Tasnim Nafisa; Tasnim Nafisa; Utpal Chandra Ray                                                                                                                                                                                                                                                                                                                                                                                                                                                                               |
| EPI_ISL_964880                                                                                                                                                                                                       | National Institute of Laboratory Medicine and Referral Center                                                                           | Sher-e-Bangla Nagar, Agargaon, Dhaka-1207, Bangladesh.                                                                                                                                           | A. K. M. Shamsuzzaman; Abu Sayeed Mohammad Mahmud; Arifa Akram; Asish Kumar Ghosh; Barna Goswami; Eshrar Osman; Iffat Jahan; Mahmuda Yeasmin; Md. Ahasan Habib; Md. Maruf Ahmed Molla; Md. Murshed Hasan Sarkar; Md. Saddam Hossain; Md. Salim Khan; Mohammad Samir Uzzaman; Shahina Akter; Tanjina Akhter Banu; Tasnim Nafisa                                                                                                                                                                                                                                                                                                                                                                                                                                                                                                                                                                                                                                                                                                                                         |
| EPI_ISL_1588527, EPI_ISL_2002062, EPI_ISL_2002131                                                                                                                                                                    | National Institute of Public Health                                                                                                     | National Institute of Public Health                                                                                                                                                              | Alexander Nagy; Dusan Trnka; Helena Jirincova; Jaromira Vecerova; Timotej Suri                                                                                                                                                                                                                                                                                                                                                                                                                                                                                                                                                                                                                                                                                                                                                                                                                                                                                                                                                                                         |
| EPI_ISL_1261357, EPI_ISL_1321358, EPI_ISL_1321399                                                                                                                                                                    | National Institute of Public Health                                                                                                     | National Reference Laboratory for Influenza and Respiratory Viruses CZE                                                                                                                          | Alexander Nagy; Dusan Trnka; Helena Jirincova; Jaromira Vecerova; Timotej Suri                                                                                                                                                                                                                                                                                                                                                                                                                                                                                                                                                                                                                                                                                                                                                                                                                                                                                                                                                                                         |
| EPI_ISL_1510285, EPI_ISL_1510303, EPI_ISL_1510401, EPI_ISL_1510417, EPI_ISL_1828727                                                                                                                                  | National Institute of Public Health                                                                                                     | State Veterinary Institute Prague                                                                                                                                                                | A; D; H; J; Jirincova; Nagy; Suri; T; Trnka; Vecerova                                                                                                                                                                                                                                                                                                                                                                                                                                                                                                                                                                                                                                                                                                                                                                                                                                                                                                                                                                                                                  |
| EPI_ISL_1133206                                                                                                                                                                                                      | National Institute of Public Health - National Institute of Hygiene                                                                     | 1. National Institute of Public Health - National Institute of Hygiene; 2. Eurofins Genomics Europe Sequencing GmbH                                                                              | ECDC COVID-19 WGS support team; Eurofins Genomics Europe Sequencing Team; Gierczyki Rafa; Sadkowska-Todys Magorzata; Wokowicz Tomasz; Zacharczuk Katarzyna                                                                                                                                                                                                                                                                                                                                                                                                                                                                                                                                                                                                                                                                                                                                                                                                                                                                                                             |
| EPI_ISL_541717                                                                                                                                                                                                       | National Institute of Virology, NIV Influenza                                                                                           | National Institute of Virology, NIV Influenza                                                                                                                                                    | Potdar V                                                                                                                                                                                                                                                                                                                                                                                                                                                                                                                                                                                                                                                                                                                                                                                                                                                                                                                                                                                                                                                               |
| EPI_ISL_1055902                                                                                                                                                                                                      | National Laboratory for Health, Environment and Food                                                                                    | CISLD (Clinical Institute of Special Laboratory Diagnostics), University Children's Hospital, University Medical Center Ljubljana                                                                | Ana Grom; Barbara Jenko Bizjan; Jernej Kova; Katarina Kozmos; Marko Pokorn; Maruša Debeljak; Robert Šket; Tadej Battelino; Tine Tesovnik                                                                                                                                                                                                                                                                                                                                                                                                                                                                                                                                                                                                                                                                                                                                                                                                                                                                                                                               |
| EPI_ISL_1266717                                                                                                                                                                                                      | National Laboratory for Health, Environment and Food, OMM, Koper                                                                        | CISLD (Clinical Institute of Special Laboratory Diagnostics), University Children's Hospital, University Medical Center Ljubljana                                                                | Ana Grom; Barbara Jenko Bizjan; Jernej Kova; Katarina Kozmos; Marko Pokorn; Maruša Debeljak; Robert Šket; Tadej Battelino; Tine Tesovnik                                                                                                                                                                                                                                                                                                                                                                                                                                                                                                                                                                                                                                                                                                                                                                                                                                                                                                                               |
| EPI_ISL_1266629                                                                                                                                                                                                      | National Laboratory for Health, Environment and Food, OMM, Kranj                                                                        | CISLD (Clinical Institute of Special Laboratory Diagnostics), University Children's Hospital, University Medical Center Ljubljana                                                                | Ana Grom; Barbara Jenko Bizjan; Jernej Kova; Katarina Kozmos; Marko Pokorn; Maruša Debeljak; Robert Šket; Tadej Battelino; Tine Tesovnik                                                                                                                                                                                                                                                                                                                                                                                                                                                                                                                                                                                                                                                                                                                                                                                                                                                                                                                               |
| EPI_ISL_2162625                                                                                                                                                                                                      | National Laboratory for Health, Environment and Food, OMM, Kranj                                                                        | NLZOH (National Laboratory for Health, Environment and Food) / CISLD (Clinical Institute of Special Laboratory Diagnostics), University Children's Hospital, University Medical Center Ljubljana | Aleksander Kocuvan; Aleksander Mahnic; Alenka Štorman; Ana Grom; Barbara Jenko Bizjan; Kaja Tominc; Katarina Kozmos; Maja Rupnik; Marjana Petrevi / Jernej Kova; Marko Pokorn; Maruša Debeljak; Mateja Ravnik; Maša Jari; Monika Korošec; Nika Gobec; Robert Šket; Sandra Janežic; Tadej Battelino; Tine Tesovnik; Tjasa Žohar retnik                                                                                                                                                                                                                                                                                                                                                                                                                                                                                                                                                                                                                                                                                                                                  |
| EPI_ISL_2001730, EPI_ISL_2162587, EPI_ISL_2162589, EPI_ISL_2162591                                                                                                                                                   | National Laboratory for Health, Environment and Food, OMM, Maribor                                                                      | NLZOH (National Laboratory for Health, Environment and Food) / CISLD (Clinical Institute of Special Laboratory Diagnostics), University Children's Hospital, University Medical Center Ljubljana | Aleksander Kocuvan; Aleksander Mahnic; Alenka Štorman; Ana Grom; Andrej Golle / Jernej Kova; Barbara Jenko Bizjan; Kaja Tominc; Katarina Kozmos; Maja Rupnik; Marko Pokorn; Maruša Debeljak; Maša Jari; Mojca Cimerman; Nika Gobec; Nika Volmajer; Robert Šket; Sandra Janežic; Tadej Battelino; Tine Tesovnik; Tjasa Žohar retnik                                                                                                                                                                                                                                                                                                                                                                                                                                                                                                                                                                                                                                                                                                                                     |

|                                                                                                                                                                                                                                                                                                                                                                           |                                                                                                                            |                                                                                                                                                                          |                                                                                                                                                                                                                                                                                                                                                                       |
|---------------------------------------------------------------------------------------------------------------------------------------------------------------------------------------------------------------------------------------------------------------------------------------------------------------------------------------------------------------------------|----------------------------------------------------------------------------------------------------------------------------|--------------------------------------------------------------------------------------------------------------------------------------------------------------------------|-----------------------------------------------------------------------------------------------------------------------------------------------------------------------------------------------------------------------------------------------------------------------------------------------------------------------------------------------------------------------|
| EPI_ISL_512600                                                                                                                                                                                                                                                                                                                                                            | National Laboratory for Influenza/Virology reference laboratory, Public Health Center of the Ministry of Health of Ukraine | Respiratory Virus Unit, Microbiology Services Colindale, Public Health England                                                                                           | Dr. Iryna Demchyshyna; PHE Covid Sequencing Team                                                                                                                                                                                                                                                                                                                      |
| EPI_ISL_647971, EPI_ISL_647980, EPI_ISL_1191798, EPI_ISL_1191807, EPI_ISL_1191818, EPI_ISL_1191833, EPI_ISL_1192047, EPI_ISL_1192056, EPI_ISL_1192059, EPI_ISL_1192066, EPI_ISL_1192068, EPI_ISL_1192071                                                                                                                                                                  | see above                                                                                                                  | National Microbiology Reference Laboratory                                                                                                                               | Quadram Institute Bioscience                                                                                                                                                                                                                                                                                                                                          |
| EPI_ISL_1524772                                                                                                                                                                                                                                                                                                                                                           | National Platform bis UMONS/Jolimont                                                                                       | National Platform bis UMONS/Jolimont                                                                                                                                     | François Dufrasne; Gautier Detry; Guillaume Bayon-Vicente; Ruddy Wattiez                                                                                                                                                                                                                                                                                              |
| EPI_ISL_1195197, EPI_ISL_1447293, EPI_ISL_1447294, EPI_ISL_1447300, EPI_ISL_1447310                                                                                                                                                                                                                                                                                       | National Public Health Center, COVID Laboratory                                                                            | National Public Health Center, National Biosafety Laboratory                                                                                                             | Bernadett Pályi; Dániel Déri; Judit Henczkó; Norbert Solymosi; Nóra Magyar; Zoltán Kis                                                                                                                                                                                                                                                                                |
| EPI_ISL_416886                                                                                                                                                                                                                                                                                                                                                            | National Public Health Laboratory                                                                                          | Malaysia Genome Institute                                                                                                                                                | Azrin Ahmad; Enizza Kasim; Hani Mat Hussin; Irni Suhayu Sopian; Mohd Faizal Abu Bakar; Mohd Noor Mat Isa; Noorliza Mohamad Noordin; Nor Azfa Johari; Norazimah Tajudin; Nurhezreen Md Iqbal; Rehan Shuhada Abu Bakar; Selvanesan Sengol; Shahrul Hisham Zainal Ariffin; Shamsidar Sopie; Siti Noraini Othman; W Afiza W Mohd Arifin; Yu Kie Chem; Yusuf Muhammad Noor |
| EPI_ISL_845549, EPI_ISL_845554                                                                                                                                                                                                                                                                                                                                            | National Public Health Laboratory, Cameroon                                                                                | African Centre of Excellence for Genomics of Infectious Diseases (ACEGID), Redeemer's University                                                                         | Oluniyi P.E. et al                                                                                                                                                                                                                                                                                                                                                    |
| EPI_ISL_462346, EPI_ISL_475997, EPI_ISL_493398, EPI_ISL_498611, EPI_ISL_512840, EPI_ISL_516822, EPI_ISL_548997, EPI_ISL_645122, EPI_ISL_862817, EPI_ISL_906835, EPI_ISL_937529, EPI_ISL_1034270, EPI_ISL_1442953, EPI_ISL_1476991, EPI_ISL_1519375, EPI_ISL_1519382, EPI_ISL_1620157, EPI_ISL_1816961, EPI_ISL_1816969, EPI_ISL_1897605, EPI_ISL_1897641, EPI_ISL_1914652 | see above                                                                                                                  | National Public Health Laboratory, National Centre for Infectious Diseases                                                                                               | National Public Health Laboratory, National Centre for Infectious Diseases                                                                                                                                                                                                                                                                                            |
| EPI_ISL_1122421                                                                                                                                                                                                                                                                                                                                                           | National Public Health Laboratory, National Centre for Infectious Diseases                                                 | National Virology Reference Laboratory                                                                                                                                   | Chavatte JM; Cui L; Grace Jie Yin Ngan; Lin Cui; Lin RTP; Mak TM; Octavia S; Raymond Tzer Pin Lin; Royce Ang; Sophie Octavia; Tze Minn Mak; Zhenyang Zhou; Zhou Z                                                                                                                                                                                                     |
| EPI_ISL_1497330, EPI_ISL_1497450, EPI_ISL_1497477                                                                                                                                                                                                                                                                                                                         | National Public Health Organization                                                                                        | National Public Health Organization                                                                                                                                      | Lin Cui; Raymond Tzer Pin Lin; Surita Taib; Tze Minn Mak; Zainun Zaini; Zhenyang Zhou                                                                                                                                                                                                                                                                                 |
| EPI_ISL_480303                                                                                                                                                                                                                                                                                                                                                            | National Reference Laboratory "Influenza and acute respiratory diseases"                                                   | NRL-HIV                                                                                                                                                                  | Kyriaki Tryfinopoulou et al                                                                                                                                                                                                                                                                                                                                           |
| EPI_ISL_1273393, EPI_ISL_1273395, EPI_ISL_1273396                                                                                                                                                                                                                                                                                                                         | National Reference Laboratory - Ministry of Health Maseru Lesotho                                                          | National Institute for Communicable Diseases of the National Health Laboratory Service                                                                                   | Ivailo Alexiev; Ivan Ivanov; Ivva Philipova                                                                                                                                                                                                                                                                                                                           |
| EPI_ISL_435675                                                                                                                                                                                                                                                                                                                                                            | National Virology Reference Laboratory                                                                                     | National Public Health Laboratory, National Centre for Infectious Diseases                                                                                               | Amoako DG; Banda R; Bhiman JN; Gorova V; Ismail A; Mahlangu B; Mathabo M; Mohale T; Mooko M; Ntuli N; Scheepers C                                                                                                                                                                                                                                                     |
| EPI_ISL_981234                                                                                                                                                                                                                                                                                                                                                            | National Virus Reference Laboratory                                                                                        | Irish Coronavirus Sequencing Consortium - Helixworks                                                                                                                     | Chavatte Jean-Marc; Cui Lin; Lin Raymond Tzer Pin; Mak Tze Minn; Octavia Sophie; Taib Surita; Zaini Zainun                                                                                                                                                                                                                                                            |
| EPI_ISL_671348                                                                                                                                                                                                                                                                                                                                                            | National Virus Reference Laboratory                                                                                        | Irish Coronavirus Sequencing Consortium - Teagasc Moorepark                                                                                                              | Conor Crosbie; Nimesh Pinnamaneni; Sachin Chalapati                                                                                                                                                                                                                                                                                                                   |
| EPI_ISL_671880, EPI_ISL_671925, EPI_ISL_959720, EPI_ISL_959727, EPI_ISL_1092647, EPI_ISL_1096218, EPI_ISL_1323774, EPI_ISL_1483494, EPI_ISL_1491528, EPI_ISL_2240857, EPI_ISL_2240898                                                                                                                                                                                     | see above                                                                                                                  | National Virus Reference Laboratory                                                                                                                                      | Calm Walsh; Genuity Ireland                                                                                                                                                                                                                                                                                                                                           |
| EPI_ISL_493184                                                                                                                                                                                                                                                                                                                                                            | National Virus Resource Center, Chinese Academy of Sciences, Wuhan 430071, China                                           | National Virus Reference Laboratory                                                                                                                                      | Calum Walsh; Charlene Bennet; Charlene Bennett; Cillian F De Gascun; Daniel Hare; Fiona Crispie; Gabriel Gonzalez; Guerrino Macrori; Jonathan Dean; Michael Carr; Paul Cotter; Seamus Fanning; Zoe Yandle                                                                                                                                                             |
| EPI_ISL_1169918, EPI_ISL_1579234, EPI_ISL_1621157, EPI_ISL_1736188, EPI_ISL_1821287, EPI_ISL_2233063                                                                                                                                                                                                                                                                      | Nebraska Public Health Laboratory                                                                                          | Computational Virology Group, Center for Bacteria and Viruses Resources and Bioinformatics, Wuhan Institute of Virology, Chinese Academy of Sciences Wuhan 430071, China | Di Liu; Hongping Wei; Jianjun Chen; Jin Xiong; Yi Huang; Yi Yan                                                                                                                                                                                                                                                                                                       |
| EPI_ISL_754068, EPI_ISL_754069, EPI_ISL_754070                                                                                                                                                                                                                                                                                                                            | Nepal Korea Friendship Municipality Hospital                                                                               | NPHL COVID-19 Response Team                                                                                                                                              | NPHL COVID-19 Response Team                                                                                                                                                                                                                                                                                                                                           |
| EPI_ISL_2086216, EPI_ISL_2086218                                                                                                                                                                                                                                                                                                                                          | Netcare Linksfield Hospital                                                                                                | Nepal Health Research Council                                                                                                                                            | Meghnath Dhimal; Pradip Gyanwali                                                                                                                                                                                                                                                                                                                                      |
| EPI_ISL_1135857, EPI_ISL_1136191, EPI_ISL_1822617                                                                                                                                                                                                                                                                                                                         | Nevada State Public Health Laboratory                                                                                      | KRISP, KZN Research Innovation and Sequencing Platform                                                                                                                   | Emmanuel SJ; Giandhari J; Lessells R; Naidoo Y; Pillay S; Ramphal U; Tegally H; Wilkinson E; de Oliveira T                                                                                                                                                                                                                                                            |
| EPI_ISL_1010704, EPI_ISL_1010709, EPI_ISL_1033024, EPI_ISL_1033027, EPI_ISL_1061033, EPI_ISL_1061036, EPI_ISL_1121982, EPI_ISL_1121988, EPI_ISL_1205303, EPI_ISL_1397954, EPI_ISL_1397956, EPI_ISL_1660398, EPI_ISL_1660402, EPI_ISL_1697279, EPI_ISL_1805699, EPI_ISL_2107451, EPI_ISL_2107456, EPI_ISL_2107458, EPI_ISL_2107500, EPI_ISL_2107502                        | see above                                                                                                                  | Nevada State Public Health Laboratory                                                                                                                                    | Andrew Gorzalski; Mark Pandori                                                                                                                                                                                                                                                                                                                                        |
| EPI_ISL_455422                                                                                                                                                                                                                                                                                                                                                            | New South Wales Health Pathology Royal Prince Alfred Hospital                                                              | Microbiology RPAH                                                                                                                                                        | Au, J.; Bull, R.; Deveson, I.; Foster, C.; Rawlinson, W.; Ruiz Silva, M.; Van Hal, S.                                                                                                                                                                                                                                                                                 |
| EPI_ISL_1173229, EPI_ISL_1173239, EPI_ISL_1970548, EPI_ISL_1970549, EPI_ISL_1970561                                                                                                                                                                                                                                                                                       | Nigeria Centre for Disease Control (NCDC)                                                                                  | African Centre of Excellence for Genomics of Infectious Diseases (ACEGID), Redeemer's University, Ede, Osun State, Nigeria                                               | Ajogbasile F.V.; Folarin O.A.; Happi C.T.; Ihekweazu C.; Kayode A.; Oguzie J.; Olawoye I.; Olumade T.; Oluniyi P.E.; Uwanibe J.                                                                                                                                                                                                                                       |
| EPI_ISL_941277                                                                                                                                                                                                                                                                                                                                                            | Nigeria Centre for Disease Control (NCDC)                                                                                  | African Centre for Excellence for Genomics of Infectious Diseases (ACEGID), Redeemer's University                                                                        | A.T.; Abechi; Ajogbasile; Akano; C.A.; C.T.; Eromon; F.V.; Folarin, O.; Happi; I.B.; J.N.; J.U.; K.O.; Kayode; Oguzie; Olawoye; Olumade; Oluniyi; P.E.; P.S.; T.J.; Ugwu; Uwanibe; et al                                                                                                                                                                              |
| EPI_ISL_527888, EPI_ISL_729924                                                                                                                                                                                                                                                                                                                                            | Nigeria Centre for Disease Control (NCDC)                                                                                  | African Centre of Excellence for Genomics of Infectious Diseases (ACEGID), Redeemer's University, Ede, Osun State, Nigeria                                               | Oluniyi P.E. et al                                                                                                                                                                                                                                                                                                                                                    |
| EPI_ISL_2240780                                                                                                                                                                                                                                                                                                                                                           | Nigeria Centre for Disease Control (NCDC)                                                                                  | African Centre of Excellence for Genomics of Infectious Diseases (ACEGID), Redeemer's University                                                                         | Oluniyi P.E. et al                                                                                                                                                                                                                                                                                                                                                    |
| EPI_ISL_1235644                                                                                                                                                                                                                                                                                                                                                           | Nigerian Centre for Disease Control (NCDC)                                                                                 | African Centre of Excellence for Genomics of Infectious Diseases (ACEGID), Redeemer's University                                                                         | A.T.; Abechi; Ajogbasile; Akano; C.A.; C.T.; Eromon; F.V.; Folarin, O.; Happi; I.B.; J.N.; J.U.; K.O.; Kayode; Nosamiefan, I.; Oguzie; Olawoye; Olumade; Oluniyi; P.E.; P.S.; T.J.; Ugwu; Uwanibe                                                                                                                                                                     |
| EPI_ISL_1035811                                                                                                                                                                                                                                                                                                                                                           | Nigerian Centre for Disease Control (NCDC)                                                                                 | African Centre of Excellence for Genomics of Infectious Diseases (ACEGID), Redeemer's University, Ede                                                                    | I.B.; Olawoye; et al                                                                                                                                                                                                                                                                                                                                                  |
| EPI_ISL_1040159, EPI_ISL_2001632                                                                                                                                                                                                                                                                                                                                          | Nordland Hospital - Bodo, Laboratory Department, Molecular Biology Unit                                                    | Norwegian Institute of Public Health, Department of Virology                                                                                                             | I.B.; Olawoye; et al                                                                                                                                                                                                                                                                                                                                                  |
|                                                                                                                                                                                                                                                                                                                                                                           |                                                                                                                            |                                                                                                                                                                          | Atiya R Ali; Debech Nadia; Engebretsen Serina Beate; Engebretsen Serina Beate Atiya R Ali; Garcia Llorente Ignacio; Hilde Elshaug; Hilde Vollan; Jon Bråte; Kamilla Heddeland Instefjord; Karoline Bragstad; Kathrine Stene-Johansen; Marie Paulsen Madsen; Olav Hungnes; Pedersen Benedikte Nevjen; Rasmus Riis Kopperud                                             |

|                                                                                                                                                                                                                                                                                                                                                                                                                      |                                                                                                                                                  |                                                                                                              |                                                                                                                                                                                                                                                                                                                                                                                                                                                                                                                                                                                                                                                                |
|----------------------------------------------------------------------------------------------------------------------------------------------------------------------------------------------------------------------------------------------------------------------------------------------------------------------------------------------------------------------------------------------------------------------|--------------------------------------------------------------------------------------------------------------------------------------------------|--------------------------------------------------------------------------------------------------------------|----------------------------------------------------------------------------------------------------------------------------------------------------------------------------------------------------------------------------------------------------------------------------------------------------------------------------------------------------------------------------------------------------------------------------------------------------------------------------------------------------------------------------------------------------------------------------------------------------------------------------------------------------------------|
| EPI_ISL_2137760                                                                                                                                                                                                                                                                                                                                                                                                      | North Carolina State Laboratory of Public Health (NCSLPH)                                                                                        | North Carolina State Laboratory of Public Health (NCSLPH)                                                    | Chase K; Glover W; Greene S; Miller MC                                                                                                                                                                                                                                                                                                                                                                                                                                                                                                                                                                                                                         |
| EPI_ISL_812236, EPI_ISL_812245, EPI_ISL_2096148, EPI_ISL_2096153, EPI_ISL_2151498                                                                                                                                                                                                                                                                                                                                    | North Dakota Department of Health, Public Health Laboratory                                                                                      | North Dakota Department of Health, Public Health Laboratory                                                  | Lisa Wingerter                                                                                                                                                                                                                                                                                                                                                                                                                                                                                                                                                                                                                                                 |
| EPI_ISL_548066, EPI_ISL_1016848, EPI_ISL_1016866                                                                                                                                                                                                                                                                                                                                                                     | North Shore Hospital                                                                                                                             | Institute of Environmental Science and Research (ESR)                                                        | Anja Werno; Antje van der Linden; Arlo Upton; Chris Mansell; David Hammer; Dragana Drinkovic; Erasmus Smit; Gary McAuliffe; Hana Sofia Andersson; Hermes Perez; James Ussher; Jill Sherwood; Jing Wang; Joep de Lig; Josh Freeman; Julia Howard; Juliet Elvy; Lauren Jelly; Mary DeAlmeida; Matt Blakiston; Matt Storey; Matthew Rogers; Max Bloomfield; Michael Addie; Michelle Balm; Muhammad Faisal; Nikki Freed; Olin Silander; Sally Roberts; Sarah Jefferies; Sharmini Muttajyah; Susan Morpeth; Susan Taylor; Timothy Blackmore; Vani Sathyendran; Veronica Playle; Virginia Hope; Xiaoyun Ren                                                          |
| EPI_ISL_2001536                                                                                                                                                                                                                                                                                                                                                                                                      | Norwegian Institute of Public Health, Department of Virology                                                                                     | Norwegian Institute of Public Health, Department of Virology                                                 | Atiya R Ali; Debech Nadia; Engebretsen Serina Beate; Garcia Llorente Ignacio; Hilde Elshaug; Hilde Volla; Jon Bråte; Kamilla Heddeland Instefjord; Karoline Bragstad; Kathrine Stene-Johansen; Marie Paulsen Madsen; Olav Hungnes; Pedersen Benedikte Nevjen; Rasmus Riis Kopperud                                                                                                                                                                                                                                                                                                                                                                             |
| EPI_ISL_925858, EPI_ISL_925900, EPI_ISL_960228, EPI_ISL_960237, EPI_ISL_960260, EPI_ISL_960301, EPI_ISL_1300663, EPI_ISL_1301734, EPI_ISL_1301735, EPI_ISL_1301741, EPI_ISL_1301750, EPI_ISL_1301754, EPI_ISL_1301757, EPI_ISL_1301758, EPI_ISL_1301759, EPI_ISL_1301792, EPI_ISL_1301794, EPI_ISL_1302679                                                                                                           |                                                                                                                                                  |                                                                                                              |                                                                                                                                                                                                                                                                                                                                                                                                                                                                                                                                                                                                                                                                |
| see above                                                                                                                                                                                                                                                                                                                                                                                                            | Nucleic Acid Testing, National Reference Laboratory                                                                                              | GIGA Medical Genomics                                                                                        | Bouchra Boujemla; Corinne Fasquelle; Esperence Umumararungu; Jacob Souopgui; Keith Durkin; Léon Mutesa; Maria Artesi; Marie-Pierre Hayette; Nathalie Renotte; Patrick Tuyisenge; Robert Rutayisire; Sabin Nsanzimana; Swaibu Gatara; Sébastien Bontems; Vincent Bours; Yvan Butera                                                                                                                                                                                                                                                                                                                                                                             |
| EPI_ISL_2241621                                                                                                                                                                                                                                                                                                                                                                                                      | Nyangabwe Hospital HIV Reference Laboratory                                                                                                      | Botswana Harvard HIV Reference Laboratory                                                                    | Boitumelo Zuze; Botshelo Radibe; David Lawrence; Dorcas Maruapula; Joseph Makhema; Kwana Lechille; Legodile Kooepile; Mosepele Mosepele; Roger Shapiro; Shahin Lockman; Sikhulile Wonderfull T. Choga; Simani Gaseitsiwe; Thongbotho Mphoyakgosi                                                                                                                                                                                                                                                                                                                                                                                                               |
| EPI_ISL_1798591                                                                                                                                                                                                                                                                                                                                                                                                      | OH Department of Health Laboratory                                                                                                               | Centers for Disease Control and Prevention Division of Viral Diseases, Pathogen Discovery                    | Alison Laufer Halpin; Ben L. Rambo-Martin; Clinton R. Paden; Dakota Howard; Darlene Wagner; Dave Wentworth; Dhvani Batra; Jasmine Padilla; Justin Lee; Katie Dillon; Krista Queen; Kristen Knipe; Kristine Lacek; Mark Burroughs; Matthew Schmeer; Mill Sheth; Peter Cook; Sam Shepard; Sarah Nobles; Shoshona Le; Suxiang Tong; Vivien Dugan; Yvette Unoaumhi                                                                                                                                                                                                                                                                                                 |
| EPI_ISL_667275, EPI_ISL_1122210, EPI_ISL_1541826                                                                                                                                                                                                                                                                                                                                                                     | OHSU Lab Services Molecular Microbiology Lab                                                                                                     | Oregon SARS-CoV-2 Genome Sequencing Center                                                                   | Alec J. Hirsch; Andrew C. Aday; Benjamin N. Bimber; Brendan L. O'Connell; Brian J. O'Roak; Daniel N. Streblov; Donna Hansel; Guang Fan; Kayla Carter; Qin; Ruth V. Nichols; Sally Grindstaff; Sonia Acharya; William B. Messer; Xuan; Xuan Qin                                                                                                                                                                                                                                                                                                                                                                                                                 |
| EPI_ISL_498181, EPI_ISL_1366743, EPI_ISL_1366744, EPI_ISL_1366745                                                                                                                                                                                                                                                                                                                                                    | OUCRU                                                                                                                                            | OUCRU                                                                                                        | Dinh Nguyen Huy Man; Guy Thwaites; Huynh Trung Trieu; Lam Anh Nguyet; Lam Minh Yen; Le Manh Hung; Le Nguyen Truc Nhu; Le Thi Thu Huong; Le Van Tan; Nghiem My Ngoc; Ngo Ngoc Quang Minh; Nguyen Tan Binh; Nguyen Thanh Dung; Nguyen Thanh Phong; Nguyen Thanh Trung; Nguyen Thi Han Ny; Nguyen Thi Thu Hong; Nguyen To Anh; Nguyen Tri Dung; Nguyen Van Vinh Chau; Tang Chi Thuong; Tran Chanh Xuan; Tran Nguyen Hoang Tu; Tran Tan Thanh; Tran Tinh Hien; Vo Thanh Lam; and Le Van Tan; for OUCRU COVID-19 research group*                                                                                                                                    |
| EPI_ISL_1073991, EPI_ISL_1138830, EPI_ISL_1138831, EPI_ISL_1138837, EPI_ISL_1138840, EPI_ISL_1138858, EPI_ISL_2104726                                                                                                                                                                                                                                                                                                |                                                                                                                                                  |                                                                                                              |                                                                                                                                                                                                                                                                                                                                                                                                                                                                                                                                                                                                                                                                |
| see above                                                                                                                                                                                                                                                                                                                                                                                                            | Office of Diseases Prevention and Control Region 4 Saraburi                                                                                      | COVID-19 Network Investigations (CONI) Alliance                                                              | Anek Mungaomklang; Angkana Huang; Anthony R. Jones; Arporn Wangwuwatsin; Bhakbhoom Panthan; Chonticha Klungtong; Duangkamon Loesbanluechai; Ekawat Pasomsab; Elizabeth Batty; Insee Sensors; Janjira Thaipadungpanit; Jutikul Kaewmalakul; Khajohn Joonlasak; Kingkan Rakmanee; Krittikorn Kumpornsin; Namfon Kotanan; Nathamon Runnachot; Pakjira Rimudusi; Payon Pengyo; Praima Moonmuang; Sataporn Hatsadichart; Sirinapa Singthong; Siriporn Lakesukthom; Sirivana Yaemnimnual; Stefan Fernandez; Suttiruk Changchawal; Thanat Chookajorn; Theerarat Kochakarn; Treewat Watthanachockchai; Wasun Chantratita; Wonvimol Lemprasert; Wuditchai Manasatienkij |
| EPI_ISL_2223853                                                                                                                                                                                                                                                                                                                                                                                                      | Ohio Department of Health Laboratory                                                                                                             | Ohio Department of Health Laboratory                                                                         | Allison Black; Brent Lee; Caitlin McDonnell; Eric Brandt; Erica Leasure; Glen McGillivray; Heather Blankenship; Holmes; Jade Mowery; Jennifer; Kelsey Florek; Keoni Omura; Kirtana Ramadugu; Quanta Brown; Stephanie Mccracken; Tyler Payne; and Tammy Bannerman                                                                                                                                                                                                                                                                                                                                                                                               |
| EPI_ISL_492022                                                                                                                                                                                                                                                                                                                                                                                                       | Oman-NIC                                                                                                                                         | Department of Microbiology and Immunology-SQUH                                                               | Abdulla Balkhair; Ahlam Al-Amri; Aisha Al-Amri; Aisha Al-Busaidi; Amina Al Jardani; Fahad Zadjali; Fatma BaAlawi; Hamida AL Barwani; Hanan Al-kind; Intisar Al-Shukri; Khulood Al-Mammary; Mohammed Al-Tobi; Samiha Al Kharusi; Samira Al-Maruqi; Zeyana AL-Dahmani                                                                                                                                                                                                                                                                                                                                                                                            |
| EPI_ISL_491131, EPI_ISL_1517192, EPI_ISL_1532283, EPI_ISL_1532285, EPI_ISL_1532288, EPI_ISL_1532289, EPI_ISL_1532290, EPI_ISL_1532294, EPI_ISL_1532305                                                                                                                                                                                                                                                               |                                                                                                                                                  |                                                                                                              |                                                                                                                                                                                                                                                                                                                                                                                                                                                                                                                                                                                                                                                                |
| see above                                                                                                                                                                                                                                                                                                                                                                                                            | Oman-National Influenza Center                                                                                                                   | Biotechnology & OMICs Laboratory                                                                             | Abdul Latif Khan; Adil Al-Wahaibi; Adil Khan; Ahlam Al-Amri; Ahmed Al Harrasi; Ahmed Al Harrasi.; Ahmed Al-Harrasi; Ahmed Al-Rawahi; Ahmed N Al-Rawahi; Aisha Al-Amri; Aisha Al-Busaidi; Amal Al-Maani; Amina Al-Jardani; Amina Al-Jardani.; Bilal Hussain; Fahad Al-Balushi; Hanan Al-Kindi; Intisar Al-Shukri; Laila Al-Balushi; Sajjad Asaf; Samiha Al-Kharusi; Samira Al-Mahruqi; Samiya Al-Zadjali; Saqib Bilal; Seif Al-Abri                                                                                                                                                                                                                             |
| EPI_ISL_766569                                                                                                                                                                                                                                                                                                                                                                                                       | Oman-National Influenza Center                                                                                                                   | Oman-National Influenza Center                                                                               | Aisha Al-Busaidi; Amina Al-Jardani; Hamida Al-Barwani; Hanan Al-Kindi; Intisar Al-Shukri; Laila Al-Balushi; Samiha Al-Kharusi; Samira Al-Mahruqi                                                                                                                                                                                                                                                                                                                                                                                                                                                                                                               |
| EPI_ISL_1381300, EPI_ISL_1381303, EPI_ISL_1443673, EPI_ISL_1443681, EPI_ISL_1968646                                                                                                                                                                                                                                                                                                                                  | Omics Sciences Laboratory                                                                                                                        | Omics Sciences Laboratory                                                                                    | Darlyn Amaya; Derly Andrade Molina; Emily Sulay Saitos Montalvo; Gabriel Morey León; Juan Carlos Fernández Cadena; Katheryn Sacheri Viteri; Paula Juliana Gavilanes Jarrín; Rubén Armas González                                                                                                                                                                                                                                                                                                                                                                                                                                                               |
| EPI_ISL_1740394                                                                                                                                                                                                                                                                                                                                                                                                      | Ontario's COVID-19 Genomics Rapid Response Coalition                                                                                             | McMaster University                                                                                          | Ahmed Draia; Allison McGeer; Andrew G. McArthur; Angel Li; Emily Panousis; Hooman Derakhshani; Jalees Nasir; Kuganya Nirmalarajah; Michael Surette; Patryk Altanas; Samira Mubareka                                                                                                                                                                                                                                                                                                                                                                                                                                                                            |
| EPI_ISL_475128                                                                                                                                                                                                                                                                                                                                                                                                       | Orebro klinisk mikrobiologi                                                                                                                      | The Public Health Agency of Sweden                                                                           | Anna Risberg; Anna-Malin Linde; Karin Tegmark-Wisell; Maria Lind Karlberg; Mattias Haukland; Olov Svartstrom; Oskar Karlsson Lindsjo; Petra Edquist; Reza Advani; Sandra Broddesson; Shamam Muradrasoli                                                                                                                                                                                                                                                                                                                                                                                                                                                        |
| EPI_ISL_1040028                                                                                                                                                                                                                                                                                                                                                                                                      | Original detection - Virology Unit, Institut Pasteur du Cambodge; Sequencing - US National Institute of Allergy and Infectious Diseases Cambodia | Virology Unit, Institut Pasteur du Cambodge                                                                  | Chau Darapeak; Chin Savuth; Erik A Karlsson; Jennifer Bohl; Jessica Manning; Kraing Sidonn; Ly Sovann; Sophana Chea; Sreyngim Lay; Veasna Duong; Yi Sengdoeum                                                                                                                                                                                                                                                                                                                                                                                                                                                                                                  |
| EPI_ISL_1310160                                                                                                                                                                                                                                                                                                                                                                                                      | Originating lab: Wales Specialist Virology Centre Sequencing lab: Pathogen Genomics Unit                                                         | Public Health Wales Microbiology Cardiff Wales Specialist Virology Centre                                    | Alec Birchley; Alexander Adams; Amy Gaskin; Angela Marchbank; Bree Gatica-Wilcox; Catherine Moore; Jason Coombes; Joanne Watkins; Joel Southgate; Johnathan Evans; Laura Gifford; Lauren Gilbert; Lee Graham; Malorie Perry; Matthew Bull; Nicole Pacchiarini; Sally Corden; Sara Kumziene-Summerhayes; Sara Rey; Sarah Taylor; Simon Cottrell; Sophie Jones; Tom Connor                                                                                                                                                                                                                                                                                       |
| EPI_ISL_872003                                                                                                                                                                                                                                                                                                                                                                                                       | Ospedale "Di Venere"                                                                                                                             | Beaconlab (Bioinformatics, Evolution and Comparative Genomics lab), Dept of Biosciences, University on Milan | Chiara M; Iacobellis M; Manzari C; Parisi A; Pesole G; Piluscio R; d'Avenia M                                                                                                                                                                                                                                                                                                                                                                                                                                                                                                                                                                                  |
| EPI_ISL_549104, EPI_ISL_1819789, EPI_ISL_1819921, EPI_ISL_1989153, EPI_ISL_2142760, EPI_ISL_2142761                                                                                                                                                                                                                                                                                                                  | Ostfold Hospital Trust - Kalnes, Centre for Laboratory Medicine, Section for gene technology and infection serology                              | Norwegian Institute of Public Health, Department of Virology                                                 | Atiya R Ali; Debech Nadia; Engebretsen Serina Beate; Garcia Llorente Ignacio; Hilde Elshaug; Hilde Synnove Volla; Hilde Volla; Jon Bråte; Kamilla Heddeland Instefjord; Karoline Bragstad; Kathrine Stene-Johansen; Marie Paulsen Madsen; Olav Hungnes; Pedersen Benedikte Nevjen; Rasmus Riis Kopperud                                                                                                                                                                                                                                                                                                                                                        |
| EPI_ISL_1181598                                                                                                                                                                                                                                                                                                                                                                                                      | Oswaldo Cruz Foundation, FIOCRUZ - Ceara (Fiocruz-CE)                                                                                            | Laboratory of Respiratory Viruses and Measles, Oswaldo Cruz Institute, FIOCRUZ                               | Alice Sampaio Rocha; Ana Carolina Mendonca; Anna Carolina Paixao; Fabio Miyajima; Fernando Motta; Joaquim César do Nascimento Sousa Júnior; Luciana Appolinario; Marilda Siqueira on behalf of the Fiocruz COVID-19 Genomic Surveillance Network; Paola Resende; Renata Serrano Lopes; Thais de Oliveira Costa                                                                                                                                                                                                                                                                                                                                                 |
| EPI_ISL_2140726                                                                                                                                                                                                                                                                                                                                                                                                      | Oudtshoorn Hospital wc OUD                                                                                                                       | NHLS/UCT                                                                                                     | Arash Iranzadeh; Bruna Galvao; Carolyn Williamson; Deelan Doolabh; Diana Hardie; Innocent Mudua; Kruger Marais; Lynn Tyers; Marvin Hsiao; Stephen Korsman                                                                                                                                                                                                                                                                                                                                                                                                                                                                                                      |
| EPI_ISL_1416982, EPI_ISL_1416988                                                                                                                                                                                                                                                                                                                                                                                     | Outre mer                                                                                                                                        | National Reference Center for Viruses of Respiratory Infections, Institut Pasteur, Paris                     | Angela Brisebarre; Camille Capel; Christophe Malabat; Corinne Maufrais; Etienne Simon-Lorière; Frédéric Lemoine; Grégoire Potiron; Louise Lefrançois; Marion Barbet; Maud Vanpeene; Méline Bizard; Sylvie Behillil; Sylvie van der Werf; Vincent Enouf                                                                                                                                                                                                                                                                                                                                                                                                         |
| EPI_ISL_1273214                                                                                                                                                                                                                                                                                                                                                                                                      | Oxford University Clinical Research Unit (OUCRU)                                                                                                 | Oxford University Clinical Research Unit (OUCRU)                                                             | Guy Thwaites; Huynh Trung Trieu; Lam Minh Yen; Le Manh Hung; Le Nguyen Truc Nhu; Le Van Tan; Nghiem My Ngoc; Ngo Ngoc Quang Minh; Nguyen Thanh Dung; Nguyen Thanh Phong; Nguyen Thi Thu Hong; Nguyen Tri Dung; Nguyen Van Vinh Chau; Tran Nguyen Hoang Tu; Tran Tan Thanh; le Thi Thu Huong                                                                                                                                                                                                                                                                                                                                                                    |
| EPI_ISL_819690                                                                                                                                                                                                                                                                                                                                                                                                       | Oxford Viromics, NDM, University of Oxford; Oxford University Hospitals; Basingstoke and North Hampshire Hospital                                | COVID-19 Genomics UK (COG-UK) Consortium                                                                     | Alex Mobbs; Amy Trebes; Anita Justice; Catrin Moore; Christophe Fraser; David Bonsall; David Buck; Emma Wise; George Macintyre; Jessica Lynch; John Todd; Mariateresa de Cesare; Matilde Mori; Monique Andersson; Nathan Moore; Nick Cortes; Robert Shaw; Stephen Kidd; Tanya Golubchik; Timothy Peto                                                                                                                                                                                                                                                                                                                                                          |
| EPI_ISL_968212, EPI_ISL_968213, EPI_ISL_1170951, EPI_ISL_1196414, EPI_ISL_1300525, EPI_ISL_1300527, EPI_ISL_1300528, EPI_ISL_1300531, EPI_ISL_1300534, EPI_ISL_1340874, EPI_ISL_1396526, EPI_ISL_1424006, EPI_ISL_1516885, EPI_ISL_1516887, EPI_ISL_1563660, EPI_ISL_1910857, EPI_ISL_2001058, EPI_ISL_2001059, EPI_ISL_2001060, EPI_ISL_2137032, EPI_ISL_2137033, EPI_ISL_2137034, EPI_ISL_2137035, EPI_ISL_2137036 |                                                                                                                                                  |                                                                                                              |                                                                                                                                                                                                                                                                                                                                                                                                                                                                                                                                                                                                                                                                |

|                                                                                                                                                                                                                                                                                                                                                                                                                                                                                                                                                                                                                                                                                                                                                                                                                                                                                 |                                                                                 |                                                                                                                      |                                                                                                                                                                                                                                                                                                                                                                                                                                                                                                                                                                                                                                                                                                                                          |
|---------------------------------------------------------------------------------------------------------------------------------------------------------------------------------------------------------------------------------------------------------------------------------------------------------------------------------------------------------------------------------------------------------------------------------------------------------------------------------------------------------------------------------------------------------------------------------------------------------------------------------------------------------------------------------------------------------------------------------------------------------------------------------------------------------------------------------------------------------------------------------|---------------------------------------------------------------------------------|----------------------------------------------------------------------------------------------------------------------|------------------------------------------------------------------------------------------------------------------------------------------------------------------------------------------------------------------------------------------------------------------------------------------------------------------------------------------------------------------------------------------------------------------------------------------------------------------------------------------------------------------------------------------------------------------------------------------------------------------------------------------------------------------------------------------------------------------------------------------|
| see above                                                                                                                                                                                                                                                                                                                                                                                                                                                                                                                                                                                                                                                                                                                                                                                                                                                                       | PHV-FSS                                                                         | PHV-FSS                                                                                                              | Son Nguyen; Son Nguyen et al; Son Nguyen et al.                                                                                                                                                                                                                                                                                                                                                                                                                                                                                                                                                                                                                                                                                          |
| EPI_ISL_1321918                                                                                                                                                                                                                                                                                                                                                                                                                                                                                                                                                                                                                                                                                                                                                                                                                                                                 | PSKUS                                                                           | Latvian Biomedical Research and Study Centre                                                                         | Daivids Fridmanis; Elina Dimina; Guntars Zarins; Ivars Silamikelis; Janis Klavins; Janis Meisters; Janis Pjalkovskis; Juris Perevoscikovs; Kaspars Megnis; Laila Silamikele; Lauma Freimane; Laura Ansons; Liga Birzniece; Monta Ustinova; Nikita Zrelavs; Uga Dumpis; Una Krumina; Vita Rovite; Zane Dobele                                                                                                                                                                                                                                                                                                                                                                                                                             |
| EPI_ISL_596500, EPI_ISL_596506, EPI_ISL_596523, EPI_ISL_596532, EPI_ISL_596535, EPI_ISL_596536, EPI_ISL_596537                                                                                                                                                                                                                                                                                                                                                                                                                                                                                                                                                                                                                                                                                                                                                                  |                                                                                 |                                                                                                                      |                                                                                                                                                                                                                                                                                                                                                                                                                                                                                                                                                                                                                                                                                                                                          |
| see above                                                                                                                                                                                                                                                                                                                                                                                                                                                                                                                                                                                                                                                                                                                                                                                                                                                                       | Palestinian Ministry of Health                                                  | Molecular Genetics Lab                                                                                               | Damien Richard; Dana Najjar; Francois Balloux; Hisham Darwish; Husam Sallam; Issa Shtayah; Lucy van Dorp; Mahmoud Ruzayqat; Nour Qutob; Osama Najjar; Zaidoun Salah                                                                                                                                                                                                                                                                                                                                                                                                                                                                                                                                                                      |
| EPI_ISL_707938                                                                                                                                                                                                                                                                                                                                                                                                                                                                                                                                                                                                                                                                                                                                                                                                                                                                  | Pamukkale University Hospital                                                   | Pamukkale University Department of Medical Genetics                                                                  | Onur TOKGUN et al.                                                                                                                                                                                                                                                                                                                                                                                                                                                                                                                                                                                                                                                                                                                       |
| EPI_ISL_1172313, EPI_ISL_1471798, EPI_ISL_1635855, EPI_ISL_1636206                                                                                                                                                                                                                                                                                                                                                                                                                                                                                                                                                                                                                                                                                                                                                                                                              | Pandemic Response Lab - NYC                                                     | Pandemic Response Lab, R&D                                                                                           | Cybill del Castillo; Dylan Law; Haiping Hao; Henry Lee; Jon Laurent; Katharine Nelson; Melissa Hopkins; Michael Hammerling; Pradeep Bugga; Shinyoung Clair Kang; Sol Rey; William Ward                                                                                                                                                                                                                                                                                                                                                                                                                                                                                                                                                   |
| EPI_ISL_2171158                                                                                                                                                                                                                                                                                                                                                                                                                                                                                                                                                                                                                                                                                                                                                                                                                                                                 | Pasig City Children's Hospital - Child's Hope                                   | Philippine Genome Center                                                                                             | Alethea R. de Guzman; Anna Ong-Lim; Arianne A. Zamora; Asia Louisa U. Chong; Benedict A. Maralit; Candice Francheska B. Tambaoan; Carlo M. Lapid; Celia Carlos; Devon Ray Pacial; Edsel Maurice Salvaña; El King D. Morado; Elcid Aaron R. Pangilinan; Eva Maria Cutiungco-de la Paz; Francis A. Tablizo; Irish Coleen A. Asin; Jaime C. Montoya; Jan Michael C. Yap; Jo-Hannah S. Llamas; John Q. Wong; Joshua Gregor A. Dizon; Juan Antonio R. Magalang; Karol Sophia Agape R. Padilla; Kenneth M. Kim; Kris P. Punayan; Marc Edsel C. Ayes; Marc Jerrone R. Castro; Maria Rosario Singh-Vergeire and Cynthia P. Saloma; Maria Sofia L. Yangzon; Marissa Alejandria; Razel Nikka M. Hao; Rianna Patricia S. Cruz; Sheila Mae M. Araiza |
| EPI_ISL_2035941, EPI_ISL_2035942, EPI_ISL_2035943, EPI_ISL_2035944, EPI_ISL_2035948, EPI_ISL_2035988                                                                                                                                                                                                                                                                                                                                                                                                                                                                                                                                                                                                                                                                                                                                                                            | Pasteur Institute - Laboratory of Clinical Virology                             | Pasteur Institute - Laboratory of Clinical Virology                                                                  | Anissa Chouikha; Henda Triki; Kais Ghedira; Mariem Gdoura; Sondos Haddad; Wasfi Fares                                                                                                                                                                                                                                                                                                                                                                                                                                                                                                                                                                                                                                                    |
| EPI_ISL_654883                                                                                                                                                                                                                                                                                                                                                                                                                                                                                                                                                                                                                                                                                                                                                                                                                                                                  | Pasteur Institute in Ho Chi Minh city                                           | Department of Microbiology and Immunology - Pasteur Institute in Ho Chi Minh city                                    | Cao Minh Thng; Hoàng Minh; Hoàng Nh ào; Hoàng Quc Cng; Hunh Phng Tho; Hunh Th Kim Loan; Lê Hoàng Chung; Lng Chn Quang; Nguyen Hoàng Anh; Nguyen Hoàng Quân; Nguyn Thanh Long; Nguyn Thu Ngc; Nguyn Th Ngc Tho; Nguyn Th Thanh Thng; Nguyn Thng Hiu; Nguyn V Thng; Phan Trng Lân; Phm Duy Quang; Phm Th Thu Hng; Trn Th Hng Kim; V Phm Hng Nhung; ào Huy Mnh; ng Thanh Giang                                                                                                                                                                                                                                                                                                                                                              |
| EPI_ISL_456163, EPI_ISL_456223, EPI_ISL_456301, EPI_ISL_582018, EPI_ISL_582019, EPI_ISL_582021, EPI_ISL_622805, EPI_ISL_622806                                                                                                                                                                                                                                                                                                                                                                                                                                                                                                                                                                                                                                                                                                                                                  |                                                                                 |                                                                                                                      |                                                                                                                                                                                                                                                                                                                                                                                                                                                                                                                                                                                                                                                                                                                                          |
| see above                                                                                                                                                                                                                                                                                                                                                                                                                                                                                                                                                                                                                                                                                                                                                                                                                                                                       | PathLab Bay of Plenty                                                           | Institute of Environmental Science and Research (ESR)                                                                | Anja Werno; Antje van der Linden; Arlo Upton; Chris Mansell; David Hammer; Dragana Drinkovic; Erasmus Smit; Gary McAuliffe; Hana Sofia Andersson; Hermes Perez; James Ussher; Jill Sherwood; Jing Wang; Joep de Ligt; Josh Freeman; Julia Howard; Juliet Elvy; Lauren Jelly; Mary DeAlmeida; Matt Blakiston; Matt Storey; Matthew Rogers; Max Bloomfield; Michael Addicte; Michelle Balm; Muhammad Faisal; Nikki Freed; Olin Silander; Sally Roberts; Sarah Jefferies; Sharmini Muttaiyah; Susan Morpeth; Susan Taylor; Timothy Blackmore; Vani Sathyendran; Veronica Playle; Virginia Hope; Xiaoyun Ren                                                                                                                                 |
| EPI_ISL_420456, EPI_ISL_470851                                                                                                                                                                                                                                                                                                                                                                                                                                                                                                                                                                                                                                                                                                                                                                                                                                                  | PathWest Laboratory Medicine WA                                                 | PathWest Laboratory Medicine WA                                                                                      | Avram Levy; Chisha Sikazwe; David Smith and David Speers; Jerissa Long                                                                                                                                                                                                                                                                                                                                                                                                                                                                                                                                                                                                                                                                   |
| EPI_ISL_512718, EPI_ISL_596698, EPI_ISL_596728, EPI_ISL_596842, EPI_ISL_605843, EPI_ISL_672639, EPI_ISL_672644, EPI_ISL_708766, EPI_ISL_708789, EPI_ISL_794683, EPI_ISL_794718, EPI_ISL_933787, EPI_ISL_933788, EPI_ISL_933793, EPI_ISL_933795, EPI_ISL_933798, EPI_ISL_933799, EPI_ISL_933802, EPI_ISL_1017678, EPI_ISL_1069391, EPI_ISL_1069392, EPI_ISL_1069393, EPI_ISL_1184507, EPI_ISL_1198800, EPI_ISL_1198801, EPI_ISL_1295930, EPI_ISL_1295933, EPI_ISL_1295934, EPI_ISL_1295935, EPI_ISL_1295936, EPI_ISL_1384811, EPI_ISL_1416321, EPI_ISL_1416324, EPI_ISL_1416325, EPI_ISL_1448426, EPI_ISL_1508993, EPI_ISL_1669116, EPI_ISL_1669122, EPI_ISL_1669125, EPI_ISL_1816921, EPI_ISL_1817560, EPI_ISL_1828699, EPI_ISL_1914666, EPI_ISL_1914667, EPI_ISL_1914668, EPI_ISL_1972908, EPI_ISL_1972911, EPI_ISL_1972912, EPI_ISL_2081529, EPI_ISL_2098723, EPI_ISL_2226229 |                                                                                 |                                                                                                                      |                                                                                                                                                                                                                                                                                                                                                                                                                                                                                                                                                                                                                                                                                                                                          |
| see above                                                                                                                                                                                                                                                                                                                                                                                                                                                                                                                                                                                                                                                                                                                                                                                                                                                                       | PathWest Laboratory Medicine WA                                                 | PathWest Laboratory Medicine WA Microbial Surveillance Unit                                                          | PathWest Laboratory Medicine WA Microbial Surveillance Unit                                                                                                                                                                                                                                                                                                                                                                                                                                                                                                                                                                                                                                                                              |
| EPI_ISL_591391, EPI_ISL_685664, EPI_ISL_688829, EPI_ISL_690716, EPI_ISL_690848, EPI_ISL_692244, EPI_ISL_896709, EPI_ISL_1124772, EPI_ISL_1127208, EPI_ISL_1426869, EPI_ISL_1926996, EPI_ISL_1929369, EPI_ISL_1931590, EPI_ISL_1932429, EPI_ISL_1933296, EPI_ISL_1933601, EPI_ISL_1934289, EPI_ISL_1934530                                                                                                                                                                                                                                                                                                                                                                                                                                                                                                                                                                       |                                                                                 |                                                                                                                      |                                                                                                                                                                                                                                                                                                                                                                                                                                                                                                                                                                                                                                                                                                                                          |
| see above                                                                                                                                                                                                                                                                                                                                                                                                                                                                                                                                                                                                                                                                                                                                                                                                                                                                       | Pathogen Genomics Center, National Institute of Infectious Diseases             | Pathogen Genomics Center, National Institute of Infectious Diseases                                                  | Chang-Kweng Lim; Eri Nakayama; Hazuka Y Furihata; Hidemasa Izumiya; Ken-ichi Lee; Kentaro Itokawa; Makoto Uchida; Masanori Hashino; Masatomo Morita; Masumichi Saito; Motohiko Ogawa; Naomi Nojiri; Nobuo Koizumi; Nozomu Hanaoka; Rina Tanaka; Sana Uchikoba; Shigeru Tajima; Shouji Yamamoto; Sunao Iyoda; Takahiro Maeji; Tsuguto Fujimoto; Tsuyoshi Sekizuka                                                                                                                                                                                                                                                                                                                                                                         |
| EPI_ISL_437752, EPI_ISL_513031, EPI_ISL_751216                                                                                                                                                                                                                                                                                                                                                                                                                                                                                                                                                                                                                                                                                                                                                                                                                                  | Pathogen Genomics Lab King Abdullah University of Science and Technology(KAUST) | Pathogen Genomics Lab King Abdullah University of Science and Technology(KAUST)                                      | Abdulaziz Alahmadi; Afrah Alsomali; Ahmad Bakur Mahmoud; Amanda Ooi; Amit Kumar Subudhi; Anwar Hashem; Arnab Pain; Asim Khogeer; Fadwa Alofi; Fathia Ben Rached; Fathia Ben-Rached; Jumana Taha; Khaled Alghithami; Khaled Alghithami; Luke Esau; Naif Almontashiri; Olga Douvropoulou; Raaeece Naeem; Rahul P Salunke; Rahul Salunke; Raushan Nugmanova; Sara Mifarrej; Sharif Hala                                                                                                                                                                                                                                                                                                                                                     |
| EPI_ISL_1710860                                                                                                                                                                                                                                                                                                                                                                                                                                                                                                                                                                                                                                                                                                                                                                                                                                                                 | Pathogenic Microorganisms Variability Laboratory                                | Pathogenic Microorganisms Variability Laboratory                                                                     | Alexander Gintsburg; Alexey Shchetinin; Andrei Siniavin; Andrey Pochtovyy; Denis Logunov; Elena Shidlovskaya; Elizaveta Divisenko; Evgeny Usachev; Ludmila Kolobukhina; Maria Nikiforova; Nadezhda Kuznetsova; Olga Burgasova; Svetlana Smetanina; Valeria Bacalin; Vladimir Gushchin                                                                                                                                                                                                                                                                                                                                                                                                                                                    |
| EPI_ISL_596320, EPI_ISL_1627570                                                                                                                                                                                                                                                                                                                                                                                                                                                                                                                                                                                                                                                                                                                                                                                                                                                 | Pathogenic Microorganisms Variability Laboratory                                | WHO National Influenza Centre Russian Federation                                                                     | Alexander Gintsburg; Alexey Shchetinin; Alina Odintsova; Andrei Siniavin; Andrey Komissarov; Andrey Pochtovyy; Anna Ignatieva; Anna Ivanova; Artem Fadeev; Artem Tkachuk; Daria Danilenko; Denis Logunov; Dmitry Bazhenov; Dmitry Lioznov; Ekaterina Milashenko; Elena Burtseva; Elena Nabieva; Elena Shidlovskaya; Elizaveta Divisenko; Evgeniya Mukasheva; Evgeny Usachev; Evgeny Usachev; Georgii Bazykin; Kirill Krasnoslobotsev; Ksenia Safina; Kseniya Komissarova; Ludmila Kolobukhina; Lyudmila Vasilchenko; Maria Nikiforova; Nadezhda Kuznetsova; Olga Burgasova; Svetlana Smetanina; Svetlana Trushakova; Valeria Bacalin; Vladimir Gushchin                                                                                  |
| EPI_ISL_407894                                                                                                                                                                                                                                                                                                                                                                                                                                                                                                                                                                                                                                                                                                                                                                                                                                                                  | Pathology Queensland                                                            | Public Health Virology Laboratory                                                                                    | Alyssa Pyke; Amanda De Jong; Andrew Van Den Hurk; Ben Huang; Carmel Taylor; David Warrilow; Doris Genge; Elisabeth Gamez; Glen Hewison; Ian Maxwell Mackay; Inga Sultana; Jamie McMahon; Jean Barcelon; Judy Northill; Mitchell Finger; Natalie Simpson; Neelima Nair; Peter Burtonclay; Peter Moore; Sarah Wheatley; Sean Moody; Sonja Hall-Mendelin; Timothy Gardam; and Frederick Moore.                                                                                                                                                                                                                                                                                                                                              |
| EPI_ISL_545032                                                                                                                                                                                                                                                                                                                                                                                                                                                                                                                                                                                                                                                                                                                                                                                                                                                                  | Pathology West - NSW Health Pathology                                           | NSW Health Pathology - Institute of Clinical Pathology and Medical Research; Westmead Hospital; University of Sydney | CIDM-PH et al.                                                                                                                                                                                                                                                                                                                                                                                                                                                                                                                                                                                                                                                                                                                           |
| EPI_ISL_2153875                                                                                                                                                                                                                                                                                                                                                                                                                                                                                                                                                                                                                                                                                                                                                                                                                                                                 | Philippine Genome Center - Biobank (Region IV-A)                                | Philippine Genome Center                                                                                             | Alethea R. de Guzman; Anna Ong-Lim; Arianne A. Zamora; Asia Louisa U. Chong; Benedict A. Maralit; Candice Francheska B. Tambaoan; Carlo M. Lapid; Celia Carlos; Devon Ray Pacial; Edsel Maurice Salvaña; El King D. Morado; Eva Maria Cutiungco-de la Paz; Francis A. Tablizo; Irish Coleen A. Asin; Jaime C. Montoya; Jan Michael C. Yap; Jo-Hannah S. Llamas; John Q. Wong; Joshua Gregor A. Dizon; Juan Antonio R. Magalang; Karol Sophia Agape R. Padilla; Kenneth M. Kim; Kris P. Punayan; Marc Edsel C. Ayes; Marc Jerrone R. Castro; Maria Rosario Singh-Vergeire and Cynthia P. Saloma; Maria Sofia L. Yangzon; Marissa Alejandria; Razel Nikka M. Hao; Rianna Patricia S. Cruz; Sheila Mae M. Araiza                            |
| EPI_ISL_2155772, EPI_ISL_2156566, EPI_ISL_2171148                                                                                                                                                                                                                                                                                                                                                                                                                                                                                                                                                                                                                                                                                                                                                                                                                               | Philippine Red Cross - Port Area                                                | Philippine Genome Center                                                                                             | Alethea R. de Guzman; Anna Ong-Lim; Arianne A. Zamora; Asia Louisa U. Chong; Benedict A. Maralit; Candice Francheska B. Tambaoan; Carlo M. Lapid; Celia Carlos; Devon Ray Pacial; Edsel Maurice Salvaña; El King D. Morado; Elcid Aaron R. Pangilinan; Eva Maria Cutiungco-de la Paz; Francis A. Tablizo; Irish Coleen A. Asin; Jaime C. Montoya; Jan Michael C. Yap; Jo-Hannah S. Llamas; John Q. Wong; Joshua Gregor A. Dizon; Juan Antonio R. Magalang; Karol Sophia Agape R. Padilla; Kenneth M. Kim; Kris P. Punayan; Marc Edsel C. Ayes; Marc Jerrone R. Castro; Maria Rosario Singh-Vergeire and Cynthia P. Saloma; Maria Sofia L. Yangzon; Marissa Alejandria; Razel Nikka M. Hao; Rianna Patricia S. Cruz; Sheila Mae M. Araiza |
| EPI_ISL_2155747, EPI_ISL_2156323                                                                                                                                                                                                                                                                                                                                                                                                                                                                                                                                                                                                                                                                                                                                                                                                                                                | Philippine Red Cross Logistics and Multipurpose Center                          | Philippine Genome Center                                                                                             | Alethea R. de Guzman; Anna Ong-Lim; Arianne A. Zamora; Asia Louisa U. Chong; Benedict A. Maralit; Candice Francheska B. Tambaoan; Carlo M. Lapid; Celia Carlos; Devon Ray Pacial; Edsel Maurice Salvaña; El King D. Morado; Elcid Aaron R. Pangilinan; Eva Maria Cutiungco-de la Paz; Francis A. Tablizo; Irish Coleen A. Asin; Jaime C. Montoya; Jan Michael C. Yap; Jo-Hannah S. Llamas; John Q. Wong; Joshua Gregor A. Dizon; Juan Antonio R. Magalang; Karol Sophia Agape R. Padilla; Kenneth M. Kim; Kris P. Punayan; Marc Edsel C. Ayes; Marc Jerrone R. Castro; Maria Rosario Singh-Vergeire and Cynthia P. Saloma; Maria Sofia L. Yangzon; Marissa Alejandria; Razel Nikka M. Hao; Rianna Patricia S. Cruz; Sheila Mae M. Araiza |
| EPI_ISL_1039956                                                                                                                                                                                                                                                                                                                                                                                                                                                                                                                                                                                                                                                                                                                                                                                                                                                                 | Platform BIS UZA/UAntwerpen                                                     | UAntwerp, Laboratory of Medical Microbiology                                                                         | Basil Britto Xavier; Christine Lammens; Herman Goossens; Jasmine Coppens; Marie Le Mercier; Veerle Matheussen                                                                                                                                                                                                                                                                                                                                                                                                                                                                                                                                                                                                                            |
| EPI_ISL_1912967                                                                                                                                                                                                                                                                                                                                                                                                                                                                                                                                                                                                                                                                                                                                                                                                                                                                 | Poplar Healthcare                                                               | Colleen B. Jonsson                                                                                                   | Colleen Jonsson; Jacob Nichols; Joythi Parvathareddy; Mariah Taylor; Surekha Surendranathan; Walter Reichard                                                                                                                                                                                                                                                                                                                                                                                                                                                                                                                                                                                                                             |
| EPI_ISL_2230442                                                                                                                                                                                                                                                                                                                                                                                                                                                                                                                                                                                                                                                                                                                                                                                                                                                                 | Pracownia Diagnostyki Molekularnej WSSK                                         | 1. National Institute of Public Health - National Institute of Hygiene; 2. Eurofins Genomics Europe Sequencing GmbH  | ECDC COVID-19 WGS support team; Eurofins Genomics Europe Sequencing Team; Gierczyki Rafa; Sadkowska-Todys Magorzata; Wokowicz Tomasz; Zacharczuk Katarzyna                                                                                                                                                                                                                                                                                                                                                                                                                                                                                                                                                                               |
| EPI_ISL_1662343                                                                                                                                                                                                                                                                                                                                                                                                                                                                                                                                                                                                                                                                                                                                                                                                                                                                 | Pt. Jawahar Lal Nehru Memorial Medical College, Raipur, Chhattisgarh            | Institute of Life Sciences - INSACOG                                                                                 | Ajay Parida; Amol M. Kanampalliwar; Arup Ghosh; Atimukta Jha; INSACOG Consortium; Punit Prasad; Rajeeb Swain; Rupesh Dash; Safal Walia; Shifu Aggarwal; Sunil K. Raghav                                                                                                                                                                                                                                                                                                                                                                                                                                                                                                                                                                  |
| EPI_ISL_1524023, EPI_ISL_1524065, EPI_ISL_1524123, EPI_ISL_1524164, EPI_ISL_1647625, EPI_ISL_1647629, EPI_ISL_1647696, EPI_ISL_1647752, EPI_ISL_1647766                                                                                                                                                                                                                                                                                                                                                                                                                                                                                                                                                                                                                                                                                                                         |                                                                                 |                                                                                                                      |                                                                                                                                                                                                                                                                                                                                                                                                                                                                                                                                                                                                                                                                                                                                          |
| see above                                                                                                                                                                                                                                                                                                                                                                                                                                                                                                                                                                                                                                                                                                                                                                                                                                                                       | Public Health Authority of the Slovak Republic                                  | Laboratory of Genomics and Bioinformatics, Comenius                                                                  | Anna Giová; Diana Rusáková; Jaroslav Budiš; Miroslav Böhmer; Tatiana Sedláková; Tomáš Szemes                                                                                                                                                                                                                                                                                                                                                                                                                                                                                                                                                                                                                                             |



|                                                                                                                                                                                                                                                                                                 |                                                                                                                         |                                                                                                                                                                                |                                                                                                                                                                                                                                                                                                                                                                                                                                                                                                                                                             |
|-------------------------------------------------------------------------------------------------------------------------------------------------------------------------------------------------------------------------------------------------------------------------------------------------|-------------------------------------------------------------------------------------------------------------------------|--------------------------------------------------------------------------------------------------------------------------------------------------------------------------------|-------------------------------------------------------------------------------------------------------------------------------------------------------------------------------------------------------------------------------------------------------------------------------------------------------------------------------------------------------------------------------------------------------------------------------------------------------------------------------------------------------------------------------------------------------------|
| EPI_ISL_1112300                                                                                                                                                                                                                                                                                 | Public Health Center of Ukraine                                                                                         | University Science Park<br>Charite Universitätsmedizin Berlin, Institute of Virology                                                                                           | Barbara Mühlemann; Christian Drosten; Ihor Kuzin; Iryna Demchyshyna; Julia Schneider; Jörn Beheim-Schwarzbach; Liudmyla Chernenko; Roman Rodyna; Talitha Veith; Terry Jones; Victor M Corman                                                                                                                                                                                                                                                                                                                                                                |
| EPI_ISL_1195666                                                                                                                                                                                                                                                                                 | Public Health Institute of Dubrovnik-Neretva County                                                                     | Croatian Institute of Public Health                                                                                                                                            | Irena Tabain; Ivana Ferenak                                                                                                                                                                                                                                                                                                                                                                                                                                                                                                                                 |
| EPI_ISL_1109518, EPI_ISL_1195727                                                                                                                                                                                                                                                                | Public Health Institute of Šibenik-Knin County                                                                          | Croatian Institute of Public Health                                                                                                                                            | Irena Tabain; Ivana Ferenak                                                                                                                                                                                                                                                                                                                                                                                                                                                                                                                                 |
| EPI_ISL_636973                                                                                                                                                                                                                                                                                  | Public Health Lab                                                                                                       | Public Health Lab                                                                                                                                                              | Alwasti; H                                                                                                                                                                                                                                                                                                                                                                                                                                                                                                                                                  |
| EPI_ISL_576141, EPI_ISL_593601, EPI_ISL_593614, EPI_ISL_593615, EPI_ISL_593627, EPI_ISL_639749, EPI_ISL_639794, EPI_ISL_693274, EPI_ISL_693283, EPI_ISL_849683, EPI_ISL_849684, EPI_ISL_849690, EPI_ISL_849727, EPI_ISL_849729, EPI_ISL_849731, EPI_ISL_849733                                  | Public Health Virology Laboratory, Forensic and Scientific Services (PHV-FSS)                                           | Public Health Virology Laboratory, Forensic and Scientific Services (PHV-FSS)                                                                                                  | Son Nguyen et al                                                                                                                                                                                                                                                                                                                                                                                                                                                                                                                                            |
| see above                                                                                                                                                                                                                                                                                       | Public Health Virology Laboratory, Forensic and Scientific Services (PHV-FSS)                                           | Public Health Virology Laboratory, Forensic and Scientific Services (PHV-FSS)                                                                                                  | Son Nguyen et al                                                                                                                                                                                                                                                                                                                                                                                                                                                                                                                                            |
| EPI_ISL_985234, EPI_ISL_985235, EPI_ISL_1061309, EPI_ISL_1061310, EPI_ISL_1098644, EPI_ISL_1098645, EPI_ISL_1121039, EPI_ISL_1121040, EPI_ISL_1137503, EPI_ISL_1137504, EPI_ISL_1137505, EPI_ISL_1804614, EPI_ISL_1910858                                                                       | Public Health Virology-Forensic and Scientific Services                                                                 | Public Health Virology-Forensic and Scientific Services                                                                                                                        | Alyssa T. Pyke et al.; Son Nguyen; Son Nguyen et al                                                                                                                                                                                                                                                                                                                                                                                                                                                                                                         |
| see above                                                                                                                                                                                                                                                                                       | Public Health Virology-Forensic and Scientific Services                                                                 | Public Health Virology-Forensic and Scientific Services                                                                                                                        | Alyssa T. Pyke et al.; Son Nguyen; Son Nguyen et al                                                                                                                                                                                                                                                                                                                                                                                                                                                                                                         |
| EPI_ISL_944740, EPI_ISL_944744, EPI_ISL_944745, EPI_ISL_944746, EPI_ISL_944747, EPI_ISL_944748, EPI_ISL_962180, EPI_ISL_1300526, EPI_ISL_1306135, EPI_ISL_1340873, EPI_ISL_1396523, EPI_ISL_1396531, EPI_ISL_1633658, EPI_ISL_1633659, EPI_ISL_1754866, EPI_ISL_1754867                         | Public Health Virology-Forensic and Scientific Services (PHV-FSS)                                                       | Public Health Virology-Forensic and Scientific Services (PHV-FSS)                                                                                                              | Son Nguyen; Son Nguyen et al                                                                                                                                                                                                                                                                                                                                                                                                                                                                                                                                |
| see above                                                                                                                                                                                                                                                                                       | Public Health Virology-Forensic and Scientific Services (PHV-FSS)                                                       | Public Health Virology-Forensic and Scientific Services (PHV-FSS)                                                                                                              | Son Nguyen; Son Nguyen et al                                                                                                                                                                                                                                                                                                                                                                                                                                                                                                                                |
| EPI_ISL_1495227                                                                                                                                                                                                                                                                                 | Public Health Authority of the Slovak Republic                                                                          | Bergthaler laboratory, CeMM Research Center for Molecular Medicine of the Austrian Academy of Sciences                                                                         | Andreas Bergthaler; Anna Schedl; Bekir Erguner; Benedikt Agerer; Christoph Bock; Fabian Amman; Jan Laine; Lukas Endler; Maelle Le Moing; Martin Senekowitsch; Michael Schuster; Petr Triska; Thomas Penz                                                                                                                                                                                                                                                                                                                                                    |
| EPI_ISL_915162, EPI_ISL_1055749                                                                                                                                                                                                                                                                 | QEII Health Sciences Centre                                                                                             | National Microbiology Laboratory (NML)                                                                                                                                         | Anna Majer; Anneliese Landgraff; CanCOGeN's metadata curation team; Dan Gaston; Darian Hole; Elsie Grudeski; Gary Van Domselaar; Grace Seo; Janice Pettipas; Jason LeBlanc; Jennifer Tanner; Kirsten Biggar; Madison Chapel; Morag Graham; Natalie Knox; Nathalie Bastien; Philip Mabon; Public Health Agency of Canada CanCOGeN team; Rhiannon Huzarewich; Russell Mandes; Shari Tyson; Timothy Booth; Todd Hachette; Yan Li                                                                                                                               |
| EPI_ISL_2196137                                                                                                                                                                                                                                                                                 | QLabs                                                                                                                   | WVU and Marshall University Combined Genomics Core Facilities                                                                                                                  | James Denvir; Peter Perrotta; Peter Stoilov; Ryan Percifield; Wesley Kimble                                                                                                                                                                                                                                                                                                                                                                                                                                                                                 |
| EPI_ISL_530239, EPI_ISL_530246, EPI_ISL_530247, EPI_ISL_530249, EPI_ISL_530258, EPI_ISL_530272, EPI_ISL_530280                                                                                                                                                                                  | Queensland Health Forensic and Scientific Services, Public Health Virology                                              | Public Health Virology Laboratory, Forensic and Scientific Services, Queensland Health                                                                                         | Son Nguyen et al                                                                                                                                                                                                                                                                                                                                                                                                                                                                                                                                            |
| see above                                                                                                                                                                                                                                                                                       | Queensland Health Forensic and Scientific Services, Public Health Virology                                              | Public Health Virology Laboratory, Forensic and Scientific Services, Queensland Health                                                                                         | Son Nguyen et al                                                                                                                                                                                                                                                                                                                                                                                                                                                                                                                                            |
| EPI_ISL_1424816, EPI_ISL_1424837, EPI_ISL_1424842                                                                                                                                                                                                                                               | Queensland Medical Laboratories                                                                                         | Melbourne Diagnostic Unit Public Health Laboratory (MDU-PHL)                                                                                                                   | N.L.; Palou, T.; Seemann, T.; Sherry; Vaccher, S.                                                                                                                                                                                                                                                                                                                                                                                                                                                                                                           |
| EPI_ISL_1424519, EPI_ISL_1424520, EPI_ISL_1424521, EPI_ISL_1424522, EPI_ISL_1424523, EPI_ISL_1424533, EPI_ISL_1424536, EPI_ISL_1424539, EPI_ISL_1424540, EPI_ISL_1424548, EPI_ISL_1424585, EPI_ISL_1424589, EPI_ISL_1424604, EPI_ISL_1424610, EPI_ISL_1424619, EPI_ISL_1424626, EPI_ISL_1424633 | Queensland Medical Laboratories                                                                                         | Victorian Infectious Diseases Reference Laboratory (VIDRL) and the Melbourne Diagnostic Unit Public Health Laboratory (MDU-PHL)                                                | N.L.; Palou, T.; Seemann, T.; Sherry; Vaccher, S.                                                                                                                                                                                                                                                                                                                                                                                                                                                                                                           |
| see above                                                                                                                                                                                                                                                                                       | Queensland Medical Laboratories                                                                                         | Victorian Infectious Diseases Reference Laboratory (VIDRL) and the Melbourne Diagnostic Unit Public Health Laboratory (MDU-PHL)                                                | N.L.; Palou, T.; Seemann, T.; Sherry; Vaccher, S.                                                                                                                                                                                                                                                                                                                                                                                                                                                                                                           |
| EPI_ISL_572053, EPI_ISL_604553, EPI_ISL_845671, EPI_ISL_876909, EPI_ISL_937026                                                                                                                                                                                                                  | Quest Diagnostics                                                                                                       | Quest Diagnostics                                                                                                                                                              | Anderson, B.; Bernstein, D.F.; Gerasimova, A.; Grover, D.; Hua, M.; I.A.; K.E.; Kagan, L.E.; Lacbawan, F.; Liu Y.; Livingston, Owen, R.; Perez, A.; R.M.; Rosenthal, S.H.; Shalhout; Shlyakhter; Tanpaiboon, P.                                                                                                                                                                                                                                                                                                                                             |
| EPI_ISL_1194251, EPI_ISL_1444537, EPI_ISL_1552202, EPI_ISL_1702164, EPI_ISL_1702603, EPI_ISL_1753210, EPI_ISL_1834227, EPI_ISL_2010900, EPI_ISL_2133521, EPI_ISL_2133586                                                                                                                        | Quest Diagnostics Incorporated                                                                                          | Centers for Disease Control and Prevention Division of Viral Diseases, Pathogen Discovery                                                                                      | A. Gerasimova; A. Perez; Adrian Paskey; B. Anderson; Ben L. Rambo-Martin; Benjamin Rambo-Martin; Christopher Gulvick; Clinton R. Paden; Dakota Howard; Darlene Wagner; Dhvani Batra; Duncan MacCannell; F. Lacbawan; I. A. Shlyakhter; Jason Caravas; K.E. Livingston; Kara Moser; L.E. Bernstein; M. Hua; Matthew Schmerer; P. Tanpaiboon; Peter W. Cook; R. M. Kagan; R. Owen; R. V. Rolando; S. H. Rosenthal; Scott Sammons; Shatavia Morrison; Suxiang Tong; Y. Liu; Yvette Unoarumhi                                                                   |
| see above                                                                                                                                                                                                                                                                                       | Quest Diagnostics Incorporated                                                                                          | Centers for Disease Control and Prevention Division of Viral Diseases, Pathogen Discovery                                                                                      | A. Gerasimova; A. Perez; B. Anderson; Ben L. Rambo-Martin; Clinton R. Paden; Dakota Howard; Dhvani Batra; Duncan MacCannell; F. Lacbawan; I. A. Shlyakhter; K.E. Livingston; L.E. Bernstein; M. Hua; P. Tanpaiboon; Peter W. Cook; R. M. Kagan; R. Owen; R. V. Rolando; S. H. Rosenthal; Suxiang Tong; Y. Liu                                                                                                                                                                                                                                               |
| EPI_ISL_1086476, EPI_ISL_1086527, EPI_ISL_1086740, EPI_ISL_1086964, EPI_ISL_1087102, EPI_ISL_1088237, EPI_ISL_1113802, EPI_ISL_1139549                                                                                                                                                          | Quest Diagnostics Incorporated                                                                                          | Respiratory Viruses Branch, Division of Viral Diseases, Centers for Disease Control and Prevention                                                                             | A. Gerasimova; A. Perez; B. Anderson; Ben L. Rambo-Martin; Clinton R. Paden; Dakota Howard; Dhvani Batra; Duncan MacCannell; F. Lacbawan; I. A. Shlyakhter; K.E. Livingston; L.E. Bernstein; M. Hua; P. Tanpaiboon; Peter W. Cook; R. M. Kagan; R. Owen; R. V. Rolando; S. H. Rosenthal; Suxiang Tong; Y. Liu                                                                                                                                                                                                                                               |
| see above                                                                                                                                                                                                                                                                                       | Quest Diagnostics Incorporated                                                                                          | Respiratory Viruses Branch, Division of Viral Diseases, Centers for Disease Control and Prevention                                                                             | A. Gerasimova; A. Perez; B. Anderson; Ben L. Rambo-Martin; Clinton R. Paden; Dakota Howard; Dhvani Batra; Duncan MacCannell; F. Lacbawan; I. A. Shlyakhter; K.E. Livingston; L.E. Bernstein; M. Hua; P. Tanpaiboon; Peter W. Cook; R. M. Kagan; R. Owen; R. V. Rolando; S. H. Rosenthal; Suxiang Tong; Y. Liu                                                                                                                                                                                                                                               |
| EPI_ISL_415644                                                                                                                                                                                                                                                                                  | R. G. Lugar Center for Public Health Research, National Center for Disease Control and Public Health (NCDC) of Georgia. | R. G. Lugar Center for Public Health Research, National Center for Disease Control and Public Health (NCDC) of Georgia.                                                        | Adam Kotorashvili; Amiran Gamkrelidze.; Ana Papkiuri; Ann Machabishvili; Anna Kasradze; Davit Tsaguria; Ekaterine Khmaladze; Ekaterine Zangaladze; Ekaterine Zghenti; Giorgi Tomashvili; Gvantsa Brachveli; Gvantsa Chanturia; Irma Burjanadze; Ketevan Sidamonidze; Khatuna Zakhshvili; Lela Sabadze; Lela Urushadze; Magda Dgebuadze; Maia Alkhazashvili; Mari Gavashelidze; Mariam Zakalashvili; Marine Murtskvaladze; Meri Patsulaia; Nato Kotaria; Nino Berishvili; Paata Imnadze; Roena Sukhiashvili; Tamar Jashiasvili; Tata Imnadze; Tea Tevdoradze |
| EPI_ISL_1284240                                                                                                                                                                                                                                                                                 | RS Harapan Mulia Cibusarah                                                                                              | Eijkman Institute for Molecular Biology, Ministry of Research and Technology/National Agency for Research and Innovation                                                       | Amin Soebandrio; Edison Johar; Frilasita A Yudhaputri; Hidayat Trimarsanto; Iskandar Adnan; Khin Saw Myint; Lydia V. Panggalo; Safarina G Malik; Sukma Oktavianthi; Willy Agustine                                                                                                                                                                                                                                                                                                                                                                          |
| EPI_ISL_1622372, EPI_ISL_1622430                                                                                                                                                                                                                                                                | RS Mitra Keluarga Gading Serpong                                                                                        | Eijkman Institute for Molecular Biology, Ministry of Research and Technology/National Agency for Research and Innovation                                                       | Amin Soebandrio; Edison Johar; Frilasita A Yudhaputri; Hidayat Trimarsanto; Iskandar Adnan; Khin Saw Myint; Lydia V. Panggalo; Muhammad Rezki Rasyak; Safarina G Malik; Sukma Oktavianthi; Willy Agustine                                                                                                                                                                                                                                                                                                                                                   |
| EPI_ISL_833506                                                                                                                                                                                                                                                                                  | RS PMI, Bogor, Indonesia                                                                                                | Biosafety Level-3 Laboratory, Indonesian Institute of Sciences (LIPI)                                                                                                          | Ade Andriani; Ahmad Fathoni; Andri Wardiana; Anggia Prasetyoputri; Anik Budhi Dharmayanthi; Gilang Akbariani; Isa Nuryana; Ratih Asmana Ningrum; Satrio Haryo Benowo; Syam Budi Iryanto                                                                                                                                                                                                                                                                                                                                                                     |
| EPI_ISL_574606                                                                                                                                                                                                                                                                                  | RS Siloam Purwakarta                                                                                                    | Eijkman Institute for Molecular Biology, Ministry of Research and Technology/National Agency for Research and Innovation                                                       | Amin Soebandrio; David H Muljono; Edison Johar; Frilasita A Yudhaputri; Herawati Sudoyo; Hidayat Trimarsanto; Iskandar A Adnan; Khin Saw Myint; Safarina G Malik; Willy Agustine                                                                                                                                                                                                                                                                                                                                                                            |
| EPI_ISL_2162168                                                                                                                                                                                                                                                                                 | RSE ON REM "National Center for Biotechnology"                                                                          | Reference laboratory for the control of viral infections                                                                                                                       | Aidar Ussebayev; Aknur Mutaliyeva; Andrey Komissarov; Artem Fadeev; Azamat Kenessov; Bekzhan Maikotov; Gaukhar Nussupbayeva; Madina Teubergenova; Maria Pisareva; Nazym Tleumbetova                                                                                                                                                                                                                                                                                                                                                                         |
| EPI_ISL_1284096                                                                                                                                                                                                                                                                                 | RSU Sumber Waras                                                                                                        | Eijkman Institute for Molecular Biology, Ministry of Research and Technology/National Agency for Research and Innovation                                                       | Amin Soebandrio; Edison Johar; Frilasita A Yudhaputri; Hidayat Trimarsanto; Iskandar Adnan; Khin Saw Myint; Lydia V. Panggalo; Safarina G Malik; Sukma Oktavianthi; Willy Agustine                                                                                                                                                                                                                                                                                                                                                                          |
| EPI_ISL_2101342                                                                                                                                                                                                                                                                                 | RSUD Mangusada                                                                                                          | Eijkman Institute for Molecular Biology, National Agency for Research and Innovation; Molecular Biology Laboratory, Faculty Medicine and Health Sciences, Warmadewa University | Amin Soebandrio; Edison Johar; Ery Sintya; Frilasita A Yudhaputri; Hidayat Trimarsanto; Ida Ayu Wayan Mahayani; Iskandar Adnan; Khin Saw Myint; Lidwina Priliani; Lydia V. Panggalo; Muhammad Rezki Rasyak; Safarina G Malik; Sri Masyeni; Sukma Oktavianthi; Willy Agustine                                                                                                                                                                                                                                                                                |
| EPI_ISL_1469281                                                                                                                                                                                                                                                                                 | RSUD Surakarta                                                                                                          | National Institute of Health Research and Development                                                                                                                          | Arie Ardiansyah Nugraha; Hana Apsari Pawestri; Hartanti Dian Ikawati; Kartika Dewi Puspa; Krisna Pangesti; Nelly Puspandari; Subangkit; Vivi Setiawaty                                                                                                                                                                                                                                                                                                                                                                                                      |
| EPI_ISL_1257846                                                                                                                                                                                                                                                                                 | RSUP Fatmawati                                                                                                          | National Institute of Health Research and Development                                                                                                                          | Arie Ardiansyah Nugraha; Hana Apsari Pawestri; Hartanti Dian Ikawati; Kartika Dewi Puspa; Krisna Pangesti; Lidya Utami; Luci Liana; Lusiyi Ningsih; Nelly Puspandari; Subangkit; Vivi Setiawaty                                                                                                                                                                                                                                                                                                                                                             |
| EPI_ISL_450509                                                                                                                                                                                                                                                                                  | Rafik Hariri University Hospital                                                                                        | Rafik Hariri University Hospital                                                                                                                                               | Rita Feghali                                                                                                                                                                                                                                                                                                                                                                                                                                                                                                                                                |
| EPI_ISL_2104743                                                                                                                                                                                                                                                                                 | Ramathibodi Chakri Naruebodindra Hospital                                                                               | COVID-19 Network Investigations (CONI) Alliance                                                                                                                                | Angkana Huang; Anthony R. Jones; Arporn Wangwiwatsin; Bhakbhoom Panthan; Chonticha Klungtong; Duangkamon Loesbanluechai; Ekawat Pasomsun; Elizabeth Batty; Insee Sensor; Janjira Thaipadungpanit; Khajohn Joonlasak; Kingkan Rakmanee; Krittikorn Kumpornsri; Namfon Kotanan; Stefan Fernandez; Thanat Chookajorn; Theerarat Kochakarn; Treewat Watthanachockchai; Wasun Chantrattita; Wudtichai Manasatienkij                                                                                                                                              |
| EPI_ISL_455925, EPI_ISL_1073964, EPI_ISL_2104740                                                                                                                                                                                                                                                | Ramathibodi Hospital                                                                                                    | COVID-19 Network Investigations (CONI) Alliance                                                                                                                                | Angkana Huang; Anthony R. Jones; Arporn Wangwiwatsin; Bhakbhoom Panthan; Chonticha Klungtong; Duangkamon Loesbanluechai; Ekawat Pasomsun; Elizabeth Batty; Insee Sensor; Janjira Thaipadungpanit; Khajohn Joonlasak; Khajohn Joonlasak; Kingkan Rakmanee; Krittikorn Kumpornsri; Namfon                                                                                                                                                                                                                                                                     |

|                                                                                                                                                                                                                                                                                                                                                                                                                                                                     |                                                                                                                                                                                                          |                                                                                                                                                                                            |                                                                                                                                                                                                                                                                                                                                                                                                                                                                                                                                                                                                                                                                                                                                                                                                                                                                                                                                                                                                                                                                                                                                                                                                                                                                                                                                                                                                                                                                                                                                                                                                                      |
|---------------------------------------------------------------------------------------------------------------------------------------------------------------------------------------------------------------------------------------------------------------------------------------------------------------------------------------------------------------------------------------------------------------------------------------------------------------------|----------------------------------------------------------------------------------------------------------------------------------------------------------------------------------------------------------|--------------------------------------------------------------------------------------------------------------------------------------------------------------------------------------------|----------------------------------------------------------------------------------------------------------------------------------------------------------------------------------------------------------------------------------------------------------------------------------------------------------------------------------------------------------------------------------------------------------------------------------------------------------------------------------------------------------------------------------------------------------------------------------------------------------------------------------------------------------------------------------------------------------------------------------------------------------------------------------------------------------------------------------------------------------------------------------------------------------------------------------------------------------------------------------------------------------------------------------------------------------------------------------------------------------------------------------------------------------------------------------------------------------------------------------------------------------------------------------------------------------------------------------------------------------------------------------------------------------------------------------------------------------------------------------------------------------------------------------------------------------------------------------------------------------------------|
| EPI_ISL_2157555, EPI_ISL_2157579, EPI_ISL_2157580                                                                                                                                                                                                                                                                                                                                                                                                                   | Red - Regional de Vigilancia Genómica del COVID-19                                                                                                                                                       | Laboratory of Respiratory Viruses and Measles, Oswaldo Cruz Institute, FIOCRUZ                                                                                                             | Kotanan; Stefan Fernandez; Thanat Chookajorn; Theerarat Kochakarn; Treewat Watthanachockchai; Wasun Chantratita; Wudtichai Manasatienkij Alice Sampaio Rocha; Ana Carolina Mendonca; Anna Carolina Paixao; Claudia Diaz; Eilisa Cavalcante Pereira; Fernando Motta; Luciana Appolinario; Marilda Siqueira on behalf of the Fiocruz COVID-19 Genomic Surveillance Network; Mitzi Castro; Paola Resende; Renata Serrano Lopes; Sandra Paola Paz; Taina Venas                                                                                                                                                                                                                                                                                                                                                                                                                                                                                                                                                                                                                                                                                                                                                                                                                                                                                                                                                                                                                                                                                                                                                           |
| EPI_ISL_1415393, EPI_ISL_1415417                                                                                                                                                                                                                                                                                                                                                                                                                                    | Reference Laboratory of the Ministry of Health                                                                                                                                                           | Laboratory of Respiratory Viruses and Measles, Oswaldo Cruz Institute, FIOCRUZ                                                                                                             | Alice Sampaio Rocha; Ana Carolina Mendonca; Anna Carolina Paixao; Fernando Motta; Indira Martins; Jessica Edwards; Luciana Appolinario; Marilda Siqueira on behalf of the Fiocruz COVID-19 Genomic Surveillance Network; Paola Resende; Renata Serrano Lopes                                                                                                                                                                                                                                                                                                                                                                                                                                                                                                                                                                                                                                                                                                                                                                                                                                                                                                                                                                                                                                                                                                                                                                                                                                                                                                                                                         |
| EPI_ISL_998292                                                                                                                                                                                                                                                                                                                                                                                                                                                      | Regional Virus Laboratory, Belfast Health and Social Care Trust                                                                                                                                          | COVID-19 Genomics UK (COG-UK) Consortium                                                                                                                                                   | Alison Watt; Ciara Cox; Conall McCaughey; David Simpson; Derek Fairley; James McKenna; Mairead Connor; Susan Feeney; Tanya Curran; Zoltan Molnar                                                                                                                                                                                                                                                                                                                                                                                                                                                                                                                                                                                                                                                                                                                                                                                                                                                                                                                                                                                                                                                                                                                                                                                                                                                                                                                                                                                                                                                                     |
| EPI_ISL_708802                                                                                                                                                                                                                                                                                                                                                                                                                                                      | Regional medical sciences center 6 chonburi                                                                                                                                                              | National Institute of Health, Department of Medical Sciences, Ministry of Public Health, Thailand                                                                                          | Malinee Chittaganpitch; Pakorn Piromtong; Pilailuk Okada; Siripaporn Phuygun; Sittiporn Parnmen; Sunthareeya Waicharoen; Thanutsapa Thanadachakul; Warawan Wongboot                                                                                                                                                                                                                                                                                                                                                                                                                                                                                                                                                                                                                                                                                                                                                                                                                                                                                                                                                                                                                                                                                                                                                                                                                                                                                                                                                                                                                                                  |
| EPI_ISL_2110838, EPI_ISL_2110843, EPI_ISL_2110847, EPI_ISL_2110848, EPI_ISL_2110851, EPI_ISL_2110858                                                                                                                                                                                                                                                                                                                                                                | Reitor da Universidade Jean Piaget Guine-Bissau                                                                                                                                                          | MRCG at LSHTM, Genomics lab                                                                                                                                                                | Abdoullie Kante; Abdul Karim Sesay; Adul Candé; Aicha Balde; Bakary Sanyang; Bubacar Delgado Pinto Embaló; Dabiri Damlari; Edmira Maria da Costa; Erica Luis Maria Magalhães; Faatu Cassama; Mariama Kujabi; Milanca Agostinho Cá; Paulina Joãozinho da Costa Jarra Manneh; Rei José Pereira; Rui Innd; Sainabou Laye Ndure; Simão Tchuda Bióté                                                                                                                                                                                                                                                                                                                                                                                                                                                                                                                                                                                                                                                                                                                                                                                                                                                                                                                                                                                                                                                                                                                                                                                                                                                                      |
| EPI_ISL_491474                                                                                                                                                                                                                                                                                                                                                                                                                                                      | Research Institute for Tropical Medicine                                                                                                                                                                 | Research Institute for Tropical Medicine                                                                                                                                                   | Catalino Demetria; Criselda Bautista; Daria Manalo; Edelwisa Mercado; Francisco Gerardo Polotan; Inez Andrea Medado; Kirstyn Brunker; Ma. Angelica Tujan; Othoniel Jan Onza                                                                                                                                                                                                                                                                                                                                                                                                                                                                                                                                                                                                                                                                                                                                                                                                                                                                                                                                                                                                                                                                                                                                                                                                                                                                                                                                                                                                                                          |
| EPI_ISL_747127                                                                                                                                                                                                                                                                                                                                                                                                                                                      | Respiratory Viruses Branch, Centers for Disease Control and Prevention                                                                                                                                   | Respiratory Viruses Branch, Centers for Disease Control and Prevention                                                                                                                     | C.R.; Cook; Lee, J.; Li, Y.; Marine, R.; Montmayeur, A.; P.W.; Paden; Queen, K.; Sheth, M.; Tao, Y.; Tong, S.; Uehara, A.; Wang, H.                                                                                                                                                                                                                                                                                                                                                                                                                                                                                                                                                                                                                                                                                                                                                                                                                                                                                                                                                                                                                                                                                                                                                                                                                                                                                                                                                                                                                                                                                  |
| EPI_ISL_1253966, EPI_ISL_1407340, EPI_ISL_1413750, EPI_ISL_2232461                                                                                                                                                                                                                                                                                                                                                                                                  | Rhode Island Department of Health                                                                                                                                                                        | Infectious Disease Program, Broad Institute of Harvard and MIT                                                                                                                             | Adams, G.; Azevedo, K.; B.L.; B.W.; Bauer, M.; Birren; Carter, A.; Chaluvadi, S.; D.J.; DeRuff, K.; Gallagher, G.; Gladden-Young, A.; Huard, R.; J.E.; K.J.; King, E.; Lagerborg, K.; Lemieux; Loreth, C.; MacInnis; Miller, A.; Normandin, E.; P.C.; Park; Peariman, L.; Reilly, S.; Rudy, M.; Sabeti; Siddle; Smole, S.; Tomkins-Tinch, C.; and MacInnis; and Sabeti                                                                                                                                                                                                                                                                                                                                                                                                                                                                                                                                                                                                                                                                                                                                                                                                                                                                                                                                                                                                                                                                                                                                                                                                                                               |
| EPI_ISL_1590491                                                                                                                                                                                                                                                                                                                                                                                                                                                     | Riga East University Hospital-National Microbiology Reference Laboratory; Eurofins Genomics Europe Sequencing GmbH                                                                                       | Riga East University Hospital-National Microbiology Reference Laboratory; Eurofins Genomics Europe Sequencing GmbH                                                                         | Arzu Algulieva; Dina Dusacka; Drta Ppola; Ilva Pole; Reinis Vangravs; Reinis Zeltmatis; Sergejs Nikisins; irts Šenders                                                                                                                                                                                                                                                                                                                                                                                                                                                                                                                                                                                                                                                                                                                                                                                                                                                                                                                                                                                                                                                                                                                                                                                                                                                                                                                                                                                                                                                                                               |
| EPI_ISL_521860, EPI_ISL_521862, EPI_ISL_779406, EPI_ISL_779408, EPI_ISL_779409, EPI_ISL_779410, EPI_ISL_779413                                                                                                                                                                                                                                                                                                                                                      | see above                                                                                                                                                                                                | Royal Darwin Hospital Pathology                                                                                                                                                            | Caly L.; Druce J.; M.L.; Meumann, E.; N.L.; Sait; Sait, M.; Schultz M.; Seemann T.; Sherry; Sherry, N.                                                                                                                                                                                                                                                                                                                                                                                                                                                                                                                                                                                                                                                                                                                                                                                                                                                                                                                                                                                                                                                                                                                                                                                                                                                                                                                                                                                                                                                                                                               |
| EPI_ISL_577607                                                                                                                                                                                                                                                                                                                                                                                                                                                      | Royal Hobart Hospital                                                                                                                                                                                    | Royal Hobart Hospital                                                                                                                                                                      | Cooley L.; van Haeften R.                                                                                                                                                                                                                                                                                                                                                                                                                                                                                                                                                                                                                                                                                                                                                                                                                                                                                                                                                                                                                                                                                                                                                                                                                                                                                                                                                                                                                                                                                                                                                                                            |
| EPI_ISL_522621, EPI_ISL_522686, EPI_ISL_522688, EPI_ISL_522705, EPI_ISL_522768                                                                                                                                                                                                                                                                                                                                                                                      | Royal Hobart Hospital Microbiology Department                                                                                                                                                            | MDU-PHL                                                                                                                                                                                    | Cooley L.; M.B.; Sait M.; Schultz; Seemann T.; Sherry N.; van Haeften R.                                                                                                                                                                                                                                                                                                                                                                                                                                                                                                                                                                                                                                                                                                                                                                                                                                                                                                                                                                                                                                                                                                                                                                                                                                                                                                                                                                                                                                                                                                                                             |
| EPI_ISL_1064148                                                                                                                                                                                                                                                                                                                                                                                                                                                     | Rwanda National Reference Laboratory                                                                                                                                                                     | Rwanda National Reference Laboratory                                                                                                                                                       | Enatha Mukantwari; Umuringa Jeanne d'Arc                                                                                                                                                                                                                                                                                                                                                                                                                                                                                                                                                                                                                                                                                                                                                                                                                                                                                                                                                                                                                                                                                                                                                                                                                                                                                                                                                                                                                                                                                                                                                                             |
| EPI_ISL_468034, EPI_ISL_468039, EPI_ISL_516551, EPI_ISL_654800, EPI_ISL_654802, EPI_ISL_654808, EPI_ISL_1029956, EPI_ISL_1701832, EPI_ISL_1704673, EPI_ISL_1704674, EPI_ISL_1704675, EPI_ISL_1704676, EPI_ISL_1704677, EPI_ISL_1704678, EPI_ISL_1704786, EPI_ISL_1704787, EPI_ISL_1704788, EPI_ISL_1704789, EPI_ISL_1704790, EPI_ISL_1704791, EPI_ISL_1704794, EPI_ISL_1704796, EPI_ISL_1704798, EPI_ISL_1704801, EPI_ISL_1704804, EPI_ISL_1704807, EPI_ISL_1706365 | see above                                                                                                                                                                                                | SA Pathology                                                                                                                                                                               | Chuan Kok Lim; Geoff Higgins; Ivan Bastian; Julien Soubrier; Karin Kassahn; Lex Leung; Luke Walters; Mark Turra; Song Gao                                                                                                                                                                                                                                                                                                                                                                                                                                                                                                                                                                                                                                                                                                                                                                                                                                                                                                                                                                                                                                                                                                                                                                                                                                                                                                                                                                                                                                                                                            |
| EPI_ISL_1628725                                                                                                                                                                                                                                                                                                                                                                                                                                                     | SAINT BENOIT                                                                                                                                                                                             | UMR PIMIT                                                                                                                                                                                  | Dr Camille Lebarbenchon; Dr David A Wilkinson; Dr Patrick Mavingui; Magali Turpin                                                                                                                                                                                                                                                                                                                                                                                                                                                                                                                                                                                                                                                                                                                                                                                                                                                                                                                                                                                                                                                                                                                                                                                                                                                                                                                                                                                                                                                                                                                                    |
| EPI_ISL_1214874, EPI_ISL_1603702                                                                                                                                                                                                                                                                                                                                                                                                                                    | SARS-CoV-2 Sequencing Castilla y Leon-Spain Consortium                                                                                                                                                   | SARS-CoV-2 Sequencing Castilla y Leon-Spain Consortium                                                                                                                                     | Antonio Orduña-Domingo; Carlos Fuster Foz; Carmen Aldea-Mansilla; Carmen Gimeno Crespo; David Abad; Gregoria Megias Lobón; Jose María Eiros Bouza; Laura Sánchez de Prada; M. Isabel Fernandez-Natal; Marta Dominguez-Gil; Marta Hernandez; María Antonia García Castro; M <sup>o</sup> Fe Brezmes-Valdivieso; Noelia Arenal Andrés; Silvia Rojo; Sonsoles Garcinuño Pérez                                                                                                                                                                                                                                                                                                                                                                                                                                                                                                                                                                                                                                                                                                                                                                                                                                                                                                                                                                                                                                                                                                                                                                                                                                           |
| EPI_ISL_2131653, EPI_ISL_2131783                                                                                                                                                                                                                                                                                                                                                                                                                                    | SARS-CoV-2 testing team, National Institute of Infectious Diseases                                                                                                                                       | Pathogen Genomics Center, National Institute of Infectious Diseases                                                                                                                        | Hazuka Y Furihata; Kentaro Itokawa; Makoto Kuroda; Masanori Hashino; Masumichi Saito; Naomi Nojiri; Nozomu Hanaoka; Rina Tanaka; Sana Uchikoba; Tsuguto Fujimoto; Tsuyoshi Sekizuka                                                                                                                                                                                                                                                                                                                                                                                                                                                                                                                                                                                                                                                                                                                                                                                                                                                                                                                                                                                                                                                                                                                                                                                                                                                                                                                                                                                                                                  |
| EPI_ISL_1109599                                                                                                                                                                                                                                                                                                                                                                                                                                                     | SC (UCO) Igiene e Sanità Pubblica (funzione integrata con SC Microbiologia e Virologia) e Az. Ospedaliero-Universitaria Udine                                                                            | ARGO Laboratorio Genomica ed Epigenomica                                                                                                                                                   | D'Agaro P; Dal Monego S; Degasperri M; Licastro D; Marcello A; Pipan C                                                                                                                                                                                                                                                                                                                                                                                                                                                                                                                                                                                                                                                                                                                                                                                                                                                                                                                                                                                                                                                                                                                                                                                                                                                                                                                                                                                                                                                                                                                                               |
| EPI_ISL_804048                                                                                                                                                                                                                                                                                                                                                                                                                                                      | SC (UCO) Igiene e Sanità Pubblica (funzione integrata con SC Microbiologia e Virologia) e Laboratory of Molecular Virology of the International Centre for Genetic Engineering and Biotechnology (ICGEB) | ARGO Laboratorio Genomica ed Epigenomica                                                                                                                                                   | D'Agaro P; Dal Monego S; Degasperri M; Licastro D; Marcello A                                                                                                                                                                                                                                                                                                                                                                                                                                                                                                                                                                                                                                                                                                                                                                                                                                                                                                                                                                                                                                                                                                                                                                                                                                                                                                                                                                                                                                                                                                                                                        |
| EPI_ISL_2228987                                                                                                                                                                                                                                                                                                                                                                                                                                                     | SD Public Health Laboratory                                                                                                                                                                              | Centers for Disease Control and Prevention Division of Viral Diseases, Pathogen Discovery                                                                                                  | Alison Laufer Halpin; Ben L. Rambo-Martin; Clinton R. Paden; Dakota Howard; Darlene Wagner; Dave Wentworth; Dhvani Batra; Jasmine Padilla; Justin Lee; Katie Dillon; Krista Queen; Kristen Knipe; Kristine Lacek; Mark Burroughs; Matthew Scherer; Mili Sheth; Peter Cook; Sam Shepard; Sarah Nobles; Shoshona Le; Suxiang Tong; Vivien Dugan; Yvette Unoarumhi                                                                                                                                                                                                                                                                                                                                                                                                                                                                                                                                                                                                                                                                                                                                                                                                                                                                                                                                                                                                                                                                                                                                                                                                                                                      |
| EPI_ISL_1966073, EPI_ISL_1966100                                                                                                                                                                                                                                                                                                                                                                                                                                    | SECAO CENTRO DE DIAGNOSTICO SECEDI                                                                                                                                                                       | Instituto Butantan / Mendelics                                                                                                                                                             | Antonio Jorge Martins; Bianca Cechetto Carlos. Mendelics; Bibiana Santos; Claudia Renata dos Santos Barros; Cíntia Bittar; David Schlesinger; Hemocentro Ribeirão Preto; Simone Kashima; Debora Botequilo Moretti; Elaine Cristina Marquize; Elaine Vieira dos Santos; Elisângela Chicaroni Mattos; Erika Freitas; Evandra Strazza Rodrigues; Felipe Allan da Silva da Costa; Flavia Aburjalle; Fábio Sossai Possebon; Guilherme Campos; Guilherme Tartino Valente; Heidge Fukumasu. USP-Botucatu; Rejane Maria Tommasini Grotto; Helena Lage Ferreira; Instituto Butantan; Dimas Tadeu Covas; Jardelina de Souza Todaa Bernardino; Jayme A. Souza-Neto; Jessica Cristina Chagas Lesbon; Jorge A. Petrolli Marchesi; José Salvatore Leister Patané; João Paulo Kitajima; João Pessoa Araújo Jr.; Leila Sabrina Ullmann; Loyze Paola Oliveira de Lima; Luiz Aurelio de Campos Crispin. Centro de Genômica Funcional da ESALQ; Luiz Lehmann Coutinho; Luiz Carlos Junior de Alcantara; Livia Sacchetto; Maisa C. Pereira Parra; Maria Carolina Elias; Marta Giovanetti; Marília Moraes; Maurício Lacerda Nogueira. Prefeitura de Sao Paulo; Melissa Palmieri.; Patricia Akemi Assato; Paula Rahal; Paulo Inacio da Costa; Rafael dos Santos Bezerra; Raquel de Lello Rocha Campos Cassano. NGS Soluções Genômicas; Pilar Drummond Sampaio Corrêa Mariani. FZEA-USP Pirassununga; Mirele Daiana Polet; Raul Machado Neto; Ricardo Augusto Brassaloti; Ricardo Haddad; Rodrigo Tocantins Calado. FAMERP-SJRP; Cecília Artico Banho; Sandra Coccuzzo Sampaio; Svetoslav Nanev Slavov; Vagner Fonseca; Vincent Louis Viala |
| EPI_ISL_2210037                                                                                                                                                                                                                                                                                                                                                                                                                                                     | SECRETARIA MUNICIPAL DE SAUDE DE CORDEIROPOLIS                                                                                                                                                           | Instituto Butantan / FZEA-USP-Pirassununga                                                                                                                                                 | Antonio Jorge Martins; Claudia Renata dos Santos Barros; David Schlesinger; Debora Botequilo Moretti; Dimas Tadeu Covas; Elaine Cristina Marquize; Elaine Vieira Santos; Evandra Strazza Rodrigues; Heidge Fukumasu; Jayme Augusto de Souza-Neto; José Salvatore Leister Patané; Luiz Alcantara; Luiz Lehmann Coutinho; Maria Carolina Elias; Maurício Lacerda Nogueira; Rafael dos Santos Bezerra; Raul Machado Neto; Rejane Maria Tommasini Grotto; Ricardo Haddad; Sandra Coccuzzo Sampaio Vessoni; Simone Kashima; Svetoslav Nanev Slavov; Vincent Louis Viala                                                                                                                                                                                                                                                                                                                                                                                                                                                                                                                                                                                                                                                                                                                                                                                                                                                                                                                                                                                                                                                   |
| EPI_ISL_1469740                                                                                                                                                                                                                                                                                                                                                                                                                                                     | SECRETARIA MUNICIPAL DE SAUDE DE TRES COROAS                                                                                                                                                             | Epiclin                                                                                                                                                                                    | Ana Paula Muterle; Carolina Comerlato; Eliana Márcia Da Ros Wendland; Fernando Hayashi Sant'Anna; Janira Prichula; Juliana Comerlato                                                                                                                                                                                                                                                                                                                                                                                                                                                                                                                                                                                                                                                                                                                                                                                                                                                                                                                                                                                                                                                                                                                                                                                                                                                                                                                                                                                                                                                                                 |
| EPI_ISL_2131417                                                                                                                                                                                                                                                                                                                                                                                                                                                     | SIESP CHIETI - DRIVE IN GISSI                                                                                                                                                                            | Istituto Zooprofilattico Sperimentale dell'Abruzzo e Molise *G. Caporale*                                                                                                                  | Ancora M; Calistri P; Cammà C; Caporale M; Curini V; Delli Compagni E; Di Domenico M; Di Lollo Valeria; Di Pasquale A; Lorusso A; Mangone I; Marcacci M; Puglia I; Rinaldi A; Savini G; Scialabba S                                                                                                                                                                                                                                                                                                                                                                                                                                                                                                                                                                                                                                                                                                                                                                                                                                                                                                                                                                                                                                                                                                                                                                                                                                                                                                                                                                                                                  |
| EPI_ISL_806751                                                                                                                                                                                                                                                                                                                                                                                                                                                      | SIESP DIPARTIMENTO DI PREVENZIONE SULMONA                                                                                                                                                                | Istituto Zooprofilattico Sperimentale dell'Abruzzo e Molise *G. Caporale*                                                                                                                  | Ancora M; Calistri P; Cammà C; Curini V; Di Domenico M; Di Pasquale A; Lorusso A; Mangone I; Marcacci M; Puglia I; Rinaldi A; Savini G                                                                                                                                                                                                                                                                                                                                                                                                                                                                                                                                                                                                                                                                                                                                                                                                                                                                                                                                                                                                                                                                                                                                                                                                                                                                                                                                                                                                                                                                               |
| EPI_ISL_2131429                                                                                                                                                                                                                                                                                                                                                                                                                                                     | SIESP DIPARTIMENTO DI PREVENZIONE TERAMO                                                                                                                                                                 | Istituto Zooprofilattico Sperimentale dell'Abruzzo e Molise *G. Caporale*                                                                                                                  | Ancora M; Calistri P; Cammà C; Caporale M; Curini V; Delli Compagni E; Di Domenico M; Di Lollo Valeria; Di Pasquale A; Lorusso A; Mangone I; Marcacci M; Puglia I; Rinaldi A; Savini G; Scialabba S                                                                                                                                                                                                                                                                                                                                                                                                                                                                                                                                                                                                                                                                                                                                                                                                                                                                                                                                                                                                                                                                                                                                                                                                                                                                                                                                                                                                                  |
| EPI_ISL_2140376                                                                                                                                                                                                                                                                                                                                                                                                                                                     | SPZOZ w Krotoszynie                                                                                                                                                                                      | 1. Tricity SARS-CoV-2 sequencing consortium: University of Gdansk, Medical University of Gdansk, Vaxican Ltd., Invicta Ltd. 2. National Institute of Public Health - National Institute of | Celina Cybulska; Karolina Gackowska; Katarzyna Groth; Katarzyna Zacharczuk; Krystyna Bienkowska Szewczyk; Lukasz Rabalski; Maciej Grzybek; Maciej Kosinski; Magdalena Nowakowska; Magorzata Sadkowska-Todys; Tomasz Wokowicz                                                                                                                                                                                                                                                                                                                                                                                                                                                                                                                                                                                                                                                                                                                                                                                                                                                                                                                                                                                                                                                                                                                                                                                                                                                                                                                                                                                         |

|                                                                                                                                                                                                                                                                                                                                                                                                                                                                                                                                                                                                                                  |                                                                                      |                                                                                                                                                                                           |                                                                                                                                                                                                                                                                                                                                                                                                                                                                                                                                                                                                                                                                                                               |
|----------------------------------------------------------------------------------------------------------------------------------------------------------------------------------------------------------------------------------------------------------------------------------------------------------------------------------------------------------------------------------------------------------------------------------------------------------------------------------------------------------------------------------------------------------------------------------------------------------------------------------|--------------------------------------------------------------------------------------|-------------------------------------------------------------------------------------------------------------------------------------------------------------------------------------------|---------------------------------------------------------------------------------------------------------------------------------------------------------------------------------------------------------------------------------------------------------------------------------------------------------------------------------------------------------------------------------------------------------------------------------------------------------------------------------------------------------------------------------------------------------------------------------------------------------------------------------------------------------------------------------------------------------------|
|                                                                                                                                                                                                                                                                                                                                                                                                                                                                                                                                                                                                                                  |                                                                                      | Hygiene, Warsaw, Poland                                                                                                                                                                   |                                                                                                                                                                                                                                                                                                                                                                                                                                                                                                                                                                                                                                                                                                               |
| EPI_ISL_1960053                                                                                                                                                                                                                                                                                                                                                                                                                                                                                                                                                                                                                  | SURA                                                                                 | Universidad Nacional de Colombia - Laboratorio Genómico One Health                                                                                                                        | Andres F. Cardona-Rios; Carlos Franco-Muñoz; Carolina Muñoz-Arango; Celeny Ortiz; Daniel O. Maldonado-Perez; Diego A. Álvarez-Díaz; Hector Alejandro Ruiz-Moreno; Idabely Betancur Ortiz; Jorge E. Osorio; Juan P. Hernandez-Ortiz; Karl A Ciuoderis; Katherine Laiton-Donato; Laura Silvana Perez; Lina M. Hurtado; Marcela Mercado-Reyes; Maria Angélica Maya; Maria Stella López; Rita Almanza Payares; Sandra Ines Cano; Simón Villegas Velásquez                                                                                                                                                                                                                                                         |
| EPI_ISL_1145882                                                                                                                                                                                                                                                                                                                                                                                                                                                                                                                                                                                                                  | SYNLAB Jena Oncoscreen                                                               | Robert Koch Institute                                                                                                                                                                     |                                                                                                                                                                                                                                                                                                                                                                                                                                                                                                                                                                                                                                                                                                               |
| EPI_ISL_1573700                                                                                                                                                                                                                                                                                                                                                                                                                                                                                                                                                                                                                  | SYNLAB MVZ Leinfelden-Echterdingen                                                   | Robert Koch Institute                                                                                                                                                                     |                                                                                                                                                                                                                                                                                                                                                                                                                                                                                                                                                                                                                                                                                                               |
| EPI_ISL_2130560                                                                                                                                                                                                                                                                                                                                                                                                                                                                                                                                                                                                                  | SYNLAB MVZ Leverkusen                                                                | Robert Koch Institute                                                                                                                                                                     |                                                                                                                                                                                                                                                                                                                                                                                                                                                                                                                                                                                                                                                                                                               |
| EPI_ISL_2105771, EPI_ISL_2178755, EPI_ISL_2230856, EPI_ISL_2230978, EPI_ISL_2230979, EPI_ISL_2231030, EPI_ISL_2231031                                                                                                                                                                                                                                                                                                                                                                                                                                                                                                            |                                                                                      |                                                                                                                                                                                           |                                                                                                                                                                                                                                                                                                                                                                                                                                                                                                                                                                                                                                                                                                               |
| see above                                                                                                                                                                                                                                                                                                                                                                                                                                                                                                                                                                                                                        | Salud Digna                                                                          | Instituto Nacional de Medicina Genomica                                                                                                                                                   | Abraham Campos-Romero; Cedro-Tanda A; Cisneros-Villanueva M; Escobar-Arrazola; Gonzalez-Barrera D; Herrera-Montalvo LA.; Hidalgo-Miranda A; Luna-Ruiz Marco; M; Mendoza-Vargas A; Moreno-Camacho José Luis; Munguia-Garza P; Orjuela-Rodríguez M; Ramirez-Vega O; Rangel-DeLeon D; Reyes-Grajeda JP; Rodriguez-Gallegos Jorge                                                                                                                                                                                                                                                                                                                                                                                 |
| EPI_ISL_2105287                                                                                                                                                                                                                                                                                                                                                                                                                                                                                                                                                                                                                  | San Antonio City of Ilagan Hospital                                                  | Philippine Genome Center                                                                                                                                                                  | Alethea R. de Guzman; Anna Ong-Lim; Arienne A. Zamora; Asia Louisa U. Chong; Benedict A. Maralit; Candice Francheska B. Tambaoan; Carlo M. Lapid; Celia Carlos; Devon Ray Pacial; Edsel Maurice Salvaña; El King D. Morado; Eva Maria Cutiongco-de la Paz; Francis A. Tablizo; Irish Coleen A. Asin; Jaime C. Montoya; Jan Michael C. Yap; Jo-Hannah S. Llamas; John Q. Wong; Joshua Gregor A. Dizon; Juan Antonio R. Magalang; Karol Sophia Agape R. Padilla; Kenneth M. Kim; Kris P. Punayan; Marc Edsel C. Ayes; Marc Jerrone R. Castro; Maria Rosario Singh-Vergeire and Cynthia P. Saloma; Maria Sofia L. Yangzon; Marissa Alejandria; Razel Nikka M. Hao; Rianna Patricia S. Cruz; Sheila Mae M. Araiza |
| EPI_ISL_512164, EPI_ISL_667032                                                                                                                                                                                                                                                                                                                                                                                                                                                                                                                                                                                                   | San Diego County Public Health Laboratory                                            | Andersen lab at Scripps Research                                                                                                                                                          | Brett Austin; Jovan Shephard; SEARCH Alliance San Diego with Tracy Basler                                                                                                                                                                                                                                                                                                                                                                                                                                                                                                                                                                                                                                     |
| EPI_ISL_1257870                                                                                                                                                                                                                                                                                                                                                                                                                                                                                                                                                                                                                  | San Gallicano Dermatological Institute I.F.O.                                        | San Gallicano Dermatological Institute I.F.O.                                                                                                                                             | ; D'Agosto G; Donzelli S; Ensolì F; Federico A; Mastrofrancesco A; Morrone A; Orlandi G; Petrolo S; Pimpinelli F.; Ricca V; Spinella F; Strano S                                                                                                                                                                                                                                                                                                                                                                                                                                                                                                                                                              |
| EPI_ISL_749706, EPI_ISL_750173, EPI_ISL_750176                                                                                                                                                                                                                                                                                                                                                                                                                                                                                                                                                                                   | Sanatorio Americano                                                                  | Instituto Pasteur de Montevideo                                                                                                                                                           | Ana Carolina Mendonça; Andres Lizasoain; Camila Simoes; Cecilia Alonso; Cecilia Salazar; Daiana Mir; Fernando Lopez-Tort; Fernando Motta; Gonzalo Bello; Ighor Arantes; Ignacio Ferrés; Jose Sotelo; Leticia Maya; Leticia Garay Martins; Luciana Appolinario; Lucia Spangenberg; Mailen Arleo; Mariana Brandes; Marilda Mendonça Siqueira; Marilda Tereza Mar da Rosa; Maria Jose Benitez-Galeano; Martin Graña; Matias Castells; Matias Victoria; Matias Salvo; Natalia Rego; Natalia Reyes; Pablo Smircich; Paola Cristina Resende; Rodney Colina; Tamara Fernandez-Calero; Tania Possi; Tatiana Schäffer Gregianini; Veronica Noya; Yasser Vega                                                           |
| EPI_ISL_1477047, EPI_ISL_1477048, EPI_ISL_1477049                                                                                                                                                                                                                                                                                                                                                                                                                                                                                                                                                                                | Sanitary-Epidemiological And Public Health Department Of Tashkent Region, Uzbekistan | Center of Genomics and bioinformatics, Bioinformatics laboratory                                                                                                                          | Abdurakhmon N Yusupov; Ibrokhim Y Abdurakhmonov.; Mirzakamol S Ayubov; Mukhammadjon H Mirzakhmedov; Shukhrat E Shermatov; Zabardast T Buriev                                                                                                                                                                                                                                                                                                                                                                                                                                                                                                                                                                  |
| EPI_ISL_524469                                                                                                                                                                                                                                                                                                                                                                                                                                                                                                                                                                                                                   | Santa Casa de Misericordia de Sao Paulo                                              | Instituto Adolfo Lutz, Interdisciplinary Procedures Center, Strategic Laboratory                                                                                                          | Claudia Regina Gonçalves; Claudio Tavares Sacchi; Erica Valessa Ramos Gomes                                                                                                                                                                                                                                                                                                                                                                                                                                                                                                                                                                                                                                   |
| EPI_ISL_1532127                                                                                                                                                                                                                                                                                                                                                                                                                                                                                                                                                                                                                  | Santa Clara Valley Medical Center                                                    | Santa Clara County Public Health Laboratory                                                                                                                                               | Santa Clara County Public Health Department                                                                                                                                                                                                                                                                                                                                                                                                                                                                                                                                                                                                                                                                   |
| EPI_ISL_1009123                                                                                                                                                                                                                                                                                                                                                                                                                                                                                                                                                                                                                  | School of Pharmacy                                                                   | School of Pharmacy                                                                                                                                                                        | Ahmed Kandelj; Ghazi Kayali; Mina Nabil Kamel; Mohamed A Ali; Rabeh El-Shesheny; Walid Abi Habib                                                                                                                                                                                                                                                                                                                                                                                                                                                                                                                                                                                                              |
| EPI_ISL_661181                                                                                                                                                                                                                                                                                                                                                                                                                                                                                                                                                                                                                   | Scientific Veterinary Institute Novi Sad                                             | Veterinary Specialized Institute "Kraljevo", Serbia                                                                                                                                       | Afonso, C.; Banovic Djeri, B.; Jankovic, M.; Jovanovic, T.; Knezevic, A.; Petrovic, T.; Sekler, M.; Tesovic, B.; Vidanovic, D.; Volkening, J.                                                                                                                                                                                                                                                                                                                                                                                                                                                                                                                                                                 |
| EPI_ISL_735405                                                                                                                                                                                                                                                                                                                                                                                                                                                                                                                                                                                                                   | Secretaria Municipal de Saude de Birigui                                             | Instituto Adolfo Lutz, Interdisciplinary Procedures Center, Strategic Laboratory                                                                                                          | Claudia Regina Gonçalves; Claudio Tavares Sacchi; Erica Valessa Ramos Gomes; Karoline Rodrigues Campos                                                                                                                                                                                                                                                                                                                                                                                                                                                                                                                                                                                                        |
| EPI_ISL_408977                                                                                                                                                                                                                                                                                                                                                                                                                                                                                                                                                                                                                   | Serology, Virology and OTDS Laboratories (SAViD), NSW Health Pathology Randwick      | NSW Health Pathology - Institute of Clinical Pathology and Medical Research; Centre for Infectious Diseases and Microbiology Laboratory Services; Westmead Hospital; University of Sydney | Carter I; Chen SC; Eden J-S; Holmes EC; Kok J and Dwyer DE for the 2019-nCoV Study Group*; Maddocks S; O'Sullivan MV; Rahman H; Rawlinson W; Rockett R; Sintchenko V                                                                                                                                                                                                                                                                                                                                                                                                                                                                                                                                          |
| EPI_ISL_849382, EPI_ISL_856800, EPI_ISL_2104813, EPI_ISL_2104823, EPI_ISL_2104824, EPI_ISL_2105570, EPI_ISL_2105572, EPI_ISL_2105573, EPI_ISL_2135135, EPI_ISL_2135140, EPI_ISL_2135142, EPI_ISL_2135144, EPI_ISL_2135164, EPI_ISL_2135273, EPI_ISL_2135334, EPI_ISL_2135682, EPI_ISL_2135715, EPI_ISL_2136001, EPI_ISL_2136029, EPI_ISL_2136063, EPI_ISL_2136101, EPI_ISL_2136116, EPI_ISL_2136120, EPI_ISL_2136142, EPI_ISL_2158716, EPI_ISL_2158741, EPI_ISL_2158746, EPI_ISL_2158748, EPI_ISL_2158752, EPI_ISL_2158754, EPI_ISL_2158760, EPI_ISL_2158770, EPI_ISL_2158785, EPI_ISL_2158817, EPI_ISL_2158839, EPI_ISL_2158845 |                                                                                      |                                                                                                                                                                                           |                                                                                                                                                                                                                                                                                                                                                                                                                                                                                                                                                                                                                                                                                                               |
| see above                                                                                                                                                                                                                                                                                                                                                                                                                                                                                                                                                                                                                        | Servicio Virosis Respiratorias-Departamento Virologia-INEI                           | Instituto Nacional Enfermedades Infecciosas C.G.Malbran                                                                                                                                   | Avaro M.; Baumeister E.; Benedetti E.; Campos J.; Cisterna D.; Dattero ME; Lorenzo F.; Molina V.; Perandones C.; Poklepovich T.; Pontoriero A.; Russo M.; Tuduri E.                                                                                                                                                                                                                                                                                                                                                                                                                                                                                                                                           |
| EPI_ISL_1393323, EPI_ISL_1393478, EPI_ISL_1393567, EPI_ISL_1745680, EPI_ISL_1746456, EPI_ISL_1922337                                                                                                                                                                                                                                                                                                                                                                                                                                                                                                                             | Servicio de Microbiología Clínica (Complejo Hospitalario de Navarra, Pamplona)       | Centro de Secuenciación NASERTIC                                                                                                                                                          | Ana Miqueleiz; Ana Navascués; Carmen Ezpeleta Baquedano                                                                                                                                                                                                                                                                                                                                                                                                                                                                                                                                                                                                                                                       |
| EPI_ISL_468844                                                                                                                                                                                                                                                                                                                                                                                                                                                                                                                                                                                                                   | Servicio de Microbiología, Hospital Miguel Servet, Zaragoza                          | SeqCOVID-SPAIN consortium/IBV(CSIC)                                                                                                                                                       | Alexander Tristancho Baró; Ana Milagro; Antonio Rezusta López; Nieves Martínez Cameo and SeqCOVID-SPAIN consortium; Yolanda Gracia Grataloup                                                                                                                                                                                                                                                                                                                                                                                                                                                                                                                                                                  |
| EPI_ISL_1786712                                                                                                                                                                                                                                                                                                                                                                                                                                                                                                                                                                                                                  | Servicio de Microbiología. Hospital Ramón y Cajal. (CIBERESP)                        | SeqCOVID-SPAIN consortium/IBV(CSIC)                                                                                                                                                       | Jose Mª González-Alba; Juan C Galán and SeqCOVID-SPAIN consortium; L. Olavarieta; Val Fernández                                                                                                                                                                                                                                                                                                                                                                                                                                                                                                                                                                                                               |
| EPI_ISL_2100143                                                                                                                                                                                                                                                                                                                                                                                                                                                                                                                                                                                                                  | Servizo de Microbioloxía. Complexo Hospitalario de Santiago de Compostela            | Servizo de Microbioloxía. Complexo Hospitalario de Santiago de Compostela                                                                                                                 | Amparo Coira; Antonio Aguilera; Carlos García-Riestra; Daniel Navarro; Gema Barbeito; Iria Roca; José Llovo; Laura Millán; Manuela Hernández; María Luisa Pérez_del_Molino; Mercedes Treviño; Rocío trasto; Teresa Lopez_Valiño; Xosé Costa                                                                                                                                                                                                                                                                                                                                                                                                                                                                   |
| EPI_ISL_416347                                                                                                                                                                                                                                                                                                                                                                                                                                                                                                                                                                                                                   | Shanghai Public Health Clinical Center, Shanghai Medical College, Fudan University   | National Research Center for Translational Medicine (Shanghai), Ruijin Hospital affiliated to Shanghai Jiao Tong University School of Medicine & Shanghai Public Health Clinical Center   | Gang Lu; Hongzhou Lu; Saijuan Chen; Shengyue Wang; Xiaonan Zhang; Yun Ling; Yun Tan                                                                                                                                                                                                                                                                                                                                                                                                                                                                                                                                                                                                                           |
| EPI_ISL_1295730, EPI_ISL_1366434, EPI_ISL_1531778, EPI_ISL_1794698                                                                                                                                                                                                                                                                                                                                                                                                                                                                                                                                                               | Sharp HealthCare Laboratory                                                          | Andersen lab at Scripps Research                                                                                                                                                          | Art Mendoza; Cathy Woerle; Jacquelyn Berumen; Liam McGinnis; Omid Bakhtar; SEARCH Alliance San Diego with Aaron Harding                                                                                                                                                                                                                                                                                                                                                                                                                                                                                                                                                                                       |
| EPI_ISL_582126                                                                                                                                                                                                                                                                                                                                                                                                                                                                                                                                                                                                                   | Sheikh Khalifa Medical City                                                          | Molecular Surveillance lab Sheikh Khalifa Medical City                                                                                                                                    | Amirharaj Francis; Hala Imambaccus; Hiba Saud; Sahar Almarzooqi; Sajeed Abdul; Stefan Weber                                                                                                                                                                                                                                                                                                                                                                                                                                                                                                                                                                                                                   |
| EPI_ISL_582608, EPI_ISL_582668                                                                                                                                                                                                                                                                                                                                                                                                                                                                                                                                                                                                   | Sheikh Khalifa Medical City                                                          | Molecular/Surveillance lab Sheikh Khalifa Medical City                                                                                                                                    | Amirharaj Francis; Hala Imambaccus; Hiba Saud; Sahar Almarzooqi; Sajeed Abdul; Stefan Weber                                                                                                                                                                                                                                                                                                                                                                                                                                                                                                                                                                                                                   |
| EPI_ISL_1533610                                                                                                                                                                                                                                                                                                                                                                                                                                                                                                                                                                                                                  | Shiraz University                                                                    | Shiraz University                                                                                                                                                                         | Abozar Ghorbani; Ebrahim Eftekhari; Hakimeh Ahmadi; Hamed Gouklani                                                                                                                                                                                                                                                                                                                                                                                                                                                                                                                                                                                                                                            |
| EPI_ISL_500557, EPI_ISL_1749434                                                                                                                                                                                                                                                                                                                                                                                                                                                                                                                                                                                                  | Singapore General Hospital                                                           | Department of Microbiology                                                                                                                                                                | Chenhao Li; Chenhao Li; Karrie Ko; Karrie Ko; Kenneth Xin Long Chan; Kern Rei Chng; Kern Rei Chng; Kian Sing Chan; Kian Sing Chan; Kun Lee Lim; Kun Lee Lim; Lynette Oon; Lynette Oon; Niranjan Nagarajan; Niranjan Nagarajan; Nurdyana Abdul Rahman; Nurdyana Abdul Rahman; Sui Sin Goh                                                                                                                                                                                                                                                                                                                                                                                                                      |
| EPI_ISL_1113276, EPI_ISL_1909745                                                                                                                                                                                                                                                                                                                                                                                                                                                                                                                                                                                                 | Sonora Quest Laboratories                                                            | TGen North                                                                                                                                                                                | *Jolene Bowers; Ashlyn Pfeiffer; Chris French; Darrin Lemmer; Dave Engelthaler; Hayley Yaglom; Heather Centner; Megan Folkerts; The Arizona COVID Genomics Union (ACGU)                                                                                                                                                                                                                                                                                                                                                                                                                                                                                                                                       |
| EPI_ISL_1219805, EPI_ISL_1219806, EPI_ISL_1314869, EPI_ISL_1578041, EPI_ISL_1578063                                                                                                                                                                                                                                                                                                                                                                                                                                                                                                                                              | South Dakota Public Health Laboratory                                                | South Dakota Public Health Laboratory                                                                                                                                                     | Jacob Garfin and Chris Carlson                                                                                                                                                                                                                                                                                                                                                                                                                                                                                                                                                                                                                                                                                |
| EPI_ISL_1016994, EPI_ISL_1017012                                                                                                                                                                                                                                                                                                                                                                                                                                                                                                                                                                                                 | South Dakota Public Health Laboratory                                                | University of Minnesota Genomics Center                                                                                                                                                   | Benjamin Auch; Corbin Dirck; Daryl M. Gohli; Jacquelyn Kuriger-Laber; John Garbe; and Chris Carlson                                                                                                                                                                                                                                                                                                                                                                                                                                                                                                                                                                                                           |
| EPI_ISL_490021, EPI_ISL_545031, EPI_ISL_667790, EPI_ISL_667802, EPI_ISL_1383237, EPI_ISL_1447288, EPI_ISL_1447291, EPI_ISL_1904452, EPI_ISL_1904468                                                                                                                                                                                                                                                                                                                                                                                                                                                                              |                                                                                      |                                                                                                                                                                                           |                                                                                                                                                                                                                                                                                                                                                                                                                                                                                                                                                                                                                                                                                                               |
| see above                                                                                                                                                                                                                                                                                                                                                                                                                                                                                                                                                                                                                        | South Eastern Area Laboratory Services (SEALS)                                       | NSW Health Pathology - Institute of Clinical Pathology and Medical Research; Westmead Hospital; University of Sydney                                                                      | CIDM-PH et al.                                                                                                                                                                                                                                                                                                                                                                                                                                                                                                                                                                                                                                                                                                |

|                                                                                                                                                                                                                                                                                                 |                                                                                                                                          |                                                                                                                                |                                                                                                                                                                                                                                                                                                                                                                                                                                                                                                                                                                                                                                                                                                                                         |
|-------------------------------------------------------------------------------------------------------------------------------------------------------------------------------------------------------------------------------------------------------------------------------------------------|------------------------------------------------------------------------------------------------------------------------------------------|--------------------------------------------------------------------------------------------------------------------------------|-----------------------------------------------------------------------------------------------------------------------------------------------------------------------------------------------------------------------------------------------------------------------------------------------------------------------------------------------------------------------------------------------------------------------------------------------------------------------------------------------------------------------------------------------------------------------------------------------------------------------------------------------------------------------------------------------------------------------------------------|
| EPI_ISL_456238, EPI_ISL_456281, EPI_ISL_579219                                                                                                                                                                                                                                                  | Southern Community Labs Dunedin                                                                                                          | Institute of Environmental Science and Research (ESR)                                                                          | Anja Werno; Antje van der Linden; Arlo Upton; Chris Mansell; David Hammer; Dragana Drinkovic; Erasmus Smit; Gary McAuliffe; Hana Sofia Andersson; Hermes Perez; James Ussher; Jill Sherwood; Jing Wang; Joep de Ligt; Josh Freeman; Julia Howard; Juliet Elvy; Lauren Jelly; Mary DeAlmeida; Matt Blakiston; Matt Storey; Matthew Rogers; Max Bloomfield; Michael Addidle; Michelle Balm; Muhammad Faisal; Nikki Freed; Olin Silander; Sally Roberts; Sarah Jefferies; Sharmini Muttaiah; Susan Morpeth; Susan Taylor; Timothy Blackmore; Vani Sathyendran; Veronica Playle; Virginia Hope; Xiaoyun Ren                                                                                                                                 |
| EPI_ISL_2105307                                                                                                                                                                                                                                                                                 | Southern Philippines Medical Center (SPMC-SNL-MBL)                                                                                       | Philippine Genome Center                                                                                                       | Alethea R. de Guzman; Anna Ong-Lim; Arienne A. Zamora; Asia Louisa U. Chong; Benedict A. Maralit; Candice Francheska B. Tambaoan; Carlo M. Lapid; Celia Carlos; Devon Ray Pacial; Edsel Maurice Salvaña; El King D. Morado; Eva Maria Cutiongco-de la Paz; Francis A. Tablizo; Irish Coleen A. Asin; Jaime C. Montoya; Jan Michael C. Yap; Jo-Hannah S. Llamas; John Q. Wong; Joshua Gregor A. Dizon; Juan Antonio R. Magalang; Karol Sophia Agape R. Padilla; Kenneth M. Kim; Kris P. Punayan; Marc Edsel C. Ayes; Marc Jerrone R. Castro; Maria Rosario Singh-Vergeire and Cynthia P. Saloma; Maria Sofia L. Yangzon; Marissa Alejandria; Razel Nikka M. Hao; Rianna Patricia S. Cruz; Sheila Mae M. Araiza                           |
| EPI_ISL_1082358, EPI_ISL_1082368                                                                                                                                                                                                                                                                | Spital Limmattal                                                                                                                         | Institute of Medical Virology, University of Zurich                                                                            | Alexandra Trkola; Annette Audigé; Cyril Shah; Gabriela Ziltener; Guido Bloemberg; Jon Huder; Jürg Böni; Kevin Steiner; Maria Grünberg; Maryam Zakeri; Michael Huber; Riccarda Capaul; Stefan Schmutz; Verena Kufner                                                                                                                                                                                                                                                                                                                                                                                                                                                                                                                     |
| EPI_ISL_513397, EPI_ISL_872581                                                                                                                                                                                                                                                                  | St Vincent's Pathology (SydPath)                                                                                                         | NSW Health Pathology - Institute of Clinical Pathology and Medical Research; Westmead Hospital; University of Sydney           | CIDM-PH et al.                                                                                                                                                                                                                                                                                                                                                                                                                                                                                                                                                                                                                                                                                                                          |
| EPI_ISL_1495111, EPI_ISL_1495112, EPI_ISL_1495114, EPI_ISL_1495121, EPI_ISL_1495126, EPI_ISL_1495130                                                                                                                                                                                            | State Institution «Public Health Center of Ministry of Health of Ukraine»                                                                | Robert Koch Institute, ZBS1 Highly Pathogenic Viruses, Berlin, Germany                                                         | Andreas Nitsche; Annika Brinkmann; Iryna Demchyshyna; Janine Michel; Liudmyla Chernenko; Roman Rodyna; Steven Uddin                                                                                                                                                                                                                                                                                                                                                                                                                                                                                                                                                                                                                     |
| EPI_ISL_752670, EPI_ISL_753056, EPI_ISL_753083, EPI_ISL_1292441, EPI_ISL_1292629, EPI_ISL_1770526, EPI_ISL_2008017, EPI_ISL_2135467, EPI_ISL_2135571                                                                                                                                            | see above                                                                                                                                | State Laboratories Division, Hawaii State Department of Health                                                                 | Ayana Garnet; Drew Kuwazaki; Edward Desmond; Pamela O'Brien; Razvan Sultana; Sabrina Diemert                                                                                                                                                                                                                                                                                                                                                                                                                                                                                                                                                                                                                                            |
| EPI_ISL_428865, EPI_ISL_428901, EPI_ISL_428908                                                                                                                                                                                                                                                  | State Research Center of Virology and Biotechnology VECTOR, Department of Collection of Microorganisms                                   | State Research Center of Virology and Biotechnology VECTOR, Department of Collection of Microorganisms                         | Alexander N. Shvalov; Elena V. Gavrilova; Oleg V. Pyankov; Rinat A. Maksyutov; Sergey A. Bodhev; Tatyana V. Tregubchak                                                                                                                                                                                                                                                                                                                                                                                                                                                                                                                                                                                                                  |
| EPI_ISL_1285161                                                                                                                                                                                                                                                                                 | Städtisches Klinikum Dresden                                                                                                             | Robert Koch Institute                                                                                                          |                                                                                                                                                                                                                                                                                                                                                                                                                                                                                                                                                                                                                                                                                                                                         |
| EPI_ISL_491082, EPI_ISL_491090                                                                                                                                                                                                                                                                  | Suceava County Emergency Hospital                                                                                                        | "Stefan cel Mare" University Metagenomics Lab                                                                                  | Antoniadis Panagiotis et al.; Lobiuc Andrei                                                                                                                                                                                                                                                                                                                                                                                                                                                                                                                                                                                                                                                                                             |
| EPI_ISL_2091024                                                                                                                                                                                                                                                                                 | Sultanah Aminah Hospital, Johor Bahru                                                                                                    | Institute for Medical Research, Infectious Disease Research Centre, National Institutes of Health, Ministry of Health Malaysia | Azizan MA; Kamel K; Mohd Zawawi Z; Ramly N; Robert F; Suppiah J; Thayan R                                                                                                                                                                                                                                                                                                                                                                                                                                                                                                                                                                                                                                                               |
| EPI_ISL_1192664, EPI_ISL_1198589, EPI_ISL_1199017, EPI_ISL_1290568, EPI_ISL_1290737, EPI_ISL_1417381, EPI_ISL_1604776, EPI_ISL_1618737, EPI_ISL_1903357, EPI_ISL_2032430, EPI_ISL_2034329, EPI_ISL_2198065, EPI_ISL_2207993, EPI_ISL_2209346, EPI_ISL_2211285, EPI_ISL_2212532, EPI_ISL_2212543 | see above                                                                                                                                | Swedish national genomic surveillance program of SARS-CoV-2                                                                    | The Public Health Agency of Sweden                                                                                                                                                                                                                                                                                                                                                                                                                                                                                                                                                                                                                                                                                                      |
| EPI_ISL_629002                                                                                                                                                                                                                                                                                  | Sydney South West Pathology Service (SSWPS) - Liverpool Hospital - NSW Health Pathology                                                  | NSW Health Pathology - Institute of Clinical Pathology and Medical Research; Westmead Hospital; University of Sydney           | CIDM-PH et al.                                                                                                                                                                                                                                                                                                                                                                                                                                                                                                                                                                                                                                                                                                                          |
| EPI_ISL_914876, EPI_ISL_914877, EPI_ISL_1383246                                                                                                                                                                                                                                                 | Sydney South West Pathology Service (SSWPS) - Royal Prince Alfred Hospital - NSW Health Pathology                                        | NSW Health Pathology - Institute of Clinical Pathology and Medical Research; Westmead Hospital; University of Sydney           | CIDM-PH et al.                                                                                                                                                                                                                                                                                                                                                                                                                                                                                                                                                                                                                                                                                                                          |
| EPI_ISL_1259122, EPI_ISL_1470037, EPI_ISL_1470152, EPI_ISL_2097047, EPI_ISL_2107221                                                                                                                                                                                                             | Synlab Eesti OÜ                                                                                                                          | 1. Laboratory of Communicable Diseases (Estonia); 2. Eurofins Genomics Europe Sequencing GmbH                                  | Lidia Dotsenko et al.                                                                                                                                                                                                                                                                                                                                                                                                                                                                                                                                                                                                                                                                                                                   |
| EPI_ISL_1787669, EPI_ISL_1787813, EPI_ISL_1988638, EPI_ISL_2095510                                                                                                                                                                                                                              | Synlab Haut de France                                                                                                                    | UMR 8199/1283 EGID                                                                                                             | Derhourhi Mehdi                                                                                                                                                                                                                                                                                                                                                                                                                                                                                                                                                                                                                                                                                                                         |
| EPI_ISL_768522                                                                                                                                                                                                                                                                                  | Synphaet Hospital                                                                                                                        | National Institute of Health, Department of Medical Sciences, Ministry of Public Health, Thailand                              | ; Natchaya Khidsang; Pakorn Piromtong; Pilailuk Okada; Ratana Tacharoenmuang; Siripaporn Phuygun; Sittiporn Parmanen; Sunthareeya Waicharoen; Thanutsapa Thanadachakul; Warawan Wongboot; sirinkanda wimol                                                                                                                                                                                                                                                                                                                                                                                                                                                                                                                              |
| EPI_ISL_455719                                                                                                                                                                                                                                                                                  | T.C. Salk Bakanl Adyaman I Salk Müdürlüü Adyaman Eitim Ve Aratma Hastanesi                                                               | VETAL Animal Health Products Company, BSL3+ Production Laboratory /Turkey                                                      | Abidin Ercan Yonucu; Fatma Nilay Tutak; Fethiye Semvili; Haluk Uluca; Mehmet Turgut; Muhittin Önderci; Murat Dönen; O. Ugur Sezerman                                                                                                                                                                                                                                                                                                                                                                                                                                                                                                                                                                                                    |
| EPI_ISL_775593                                                                                                                                                                                                                                                                                  | TATAA Biocenter                                                                                                                          | The Public Health Agency of Sweden                                                                                             | Department of Microbiology; The Public Health Agency of Sweden                                                                                                                                                                                                                                                                                                                                                                                                                                                                                                                                                                                                                                                                          |
| EPI_ISL_1827708                                                                                                                                                                                                                                                                                 | TLC                                                                                                                                      | National Institute for Communicable Diseases of the National Health Laboratory Service                                         | Amoako DG; Bhiman JN; Ismail A; Mahlangu B; Maphalala GP; Mohale T; Ntuli N; Scheepers C                                                                                                                                                                                                                                                                                                                                                                                                                                                                                                                                                                                                                                                |
| EPI_ISL_1196006                                                                                                                                                                                                                                                                                 | TLC Clinic                                                                                                                               | National Institute for Communicable Diseases of the National Health Laboratory Service                                         | Amoako DG; Bhiman JN; Ismail A; Mahlangu B; Maphalala GP; Mohale T; Ntuli N; Scheepers C                                                                                                                                                                                                                                                                                                                                                                                                                                                                                                                                                                                                                                                |
| EPI_ISL_447256, EPI_ISL_457726                                                                                                                                                                                                                                                                  | TSGH-CP molecular lab                                                                                                                    | TSGH-CP molecular lab                                                                                                          | Cherng-Lih Perng; Chien-Wen Chen; Chih-Kai Chang; Feng-Yee Chang; Hsing-Yi Chung; Hung-Sheng Shang; Jung-Chung Lin; Kuo-Ming Yeh; Kuo-Sheng Hung; Ming-Jr JIAN; Sheng-Kang Chiu; Shih-Hung Tsai; Tien-Yao Chang                                                                                                                                                                                                                                                                                                                                                                                                                                                                                                                         |
| EPI_ISL_412968                                                                                                                                                                                                                                                                                  | Takayuki Hishiki Kanagawa Prefectural Institute of Public Health                                                                         | Takayuki Hishiki Kanagawa Prefectural Institute of Public Health                                                               | An, T.; Hayashizaki; Hishiki, T.; Kawai, J.; Kogo, Y.; Matsuki, Y.; Sakuragi, J.; Suzuki, R.; Tanaka, Y.; Usui, K.; Y. and Takasaki, T.                                                                                                                                                                                                                                                                                                                                                                                                                                                                                                                                                                                                 |
| EPI_ISL_1626630                                                                                                                                                                                                                                                                                 | Texas Department of State Health Services (TXDSHS)                                                                                       | Texas Department of State Health Services (TXDSHS)                                                                             | Anita Pokharel; Bonnie Oh; Chun Wang; Grace Kubin; Jenny Zhang; Lorraine Rodriguez; Maliha Rahman; Mayela Pedreza; Myong Koag; Rachel Lee; Rashmi Tuladhar                                                                                                                                                                                                                                                                                                                                                                                                                                                                                                                                                                              |
| EPI_ISL_1969991                                                                                                                                                                                                                                                                                 | Thai Red Cross Emerging Infectious Diseases Health Science Centre, Chulalongkorn Hospital, Faculty of Medicine, Chulalongkorn University | Thai Red Cross Emerging Infectious Diseases Center and Faculty of Medicine, Chulalongkorn University                           | Anthony R. Jones; Chonticha Klungthong; Khajohn Joonlasak; Opass Pucharoen; Piyawan Chinnawirotpisan; Rome Buathong; Sopon Iamsirithaworn; Stefan Fernandez; Supaporn Wacharapuesadee; Wichai Thanasopon; Wuditchai Manasatienkij                                                                                                                                                                                                                                                                                                                                                                                                                                                                                                       |
| EPI_ISL_756357, EPI_ISL_1490228, EPI_ISL_1490666, EPI_ISL_1498095, EPI_ISL_1498262, EPI_ISL_1498379, EPI_ISL_2230690, EPI_ISL_2230693, EPI_ISL_2230696, EPI_ISL_2230698                                                                                                                         | see above                                                                                                                                | The Caribbean Public Health Agency                                                                                             | Carrington Lab, Department of PreClinical Sciences, Faculty of Medical Sciences, The University of the West Indies                                                                                                                                                                                                                                                                                                                                                                                                                                                                                                                                                                                                                      |
| EPI_ISL_429086                                                                                                                                                                                                                                                                                  | The First Affiliated Hospital of Guangzhou Medical University                                                                            | BGI-shenzhen & The First Affiliated Hospital of Guangzhou Medical University                                                   | Adesh Ramsubhag; Arianne Brown-Jordan; Avery Hinds; Chinna Chinnadurai; Christine V. F. Carrington; Christopher Oura; Gabriel Escobar; Jaya Jayaraman; Jerome Foster; Karla Georges; Marsha Ivey; Naresh Nandram; Narine Singh; Nikita S. D. Sahadeo; Nuno Faria; Oliver Pybus; Rahul Naidu; Rajini Haraksingh; Risha Singh; Roshan Parasram; Sarah Hill; Shawn Charles; Stanley Giddings; SueMin Nathaniel; Vernie Ramkissoon                                                                                                                                                                                                                                                                                                          |
| EPI_ISL_2230034                                                                                                                                                                                                                                                                                 | The Jackson Laboratory                                                                                                                   | The Jackson Laboratory                                                                                                         | Adams M; Bergeron D; Kelly K; Li L; Long J; Omerza G; Renzette N                                                                                                                                                                                                                                                                                                                                                                                                                                                                                                                                                                                                                                                                        |
| EPI_ISL_2188139                                                                                                                                                                                                                                                                                 | The Lord's Grace Medical and Industrial Clinic                                                                                           | Philippine Genome Center                                                                                                       | Alethea R. de Guzman; Anna Ong-Lim; Arienne A. Zamora; Asia Louisa U. Chong; Benedict A. Maralit; Candice Francheska B. Tambaoan; Carlo M. Lapid; Celia Carlos; Devon Ray Pacial; Edsel Maurice Salvaña; El King D. Morado; Elcid Aaron R. Panglinan; Eva Maria Cutiongco-de la Paz; Francis A. Tablizo; Irish Coleen A. Asin; Jaime C. Montoya; Jan Michael C. Yap; Jo-Hannah S. Llamas; John Q. Wong; Joshua Gregor A. Dizon; Juan Antonio R. Magalang; Karol Sophia Agape R. Padilla; Kenneth M. Kim; Kris P. Punayan; Marc Edsel C. Ayes; Marc Jerrone R. Castro; Maria Rosario Singh-Vergeire and Cynthia P. Saloma; Maria Sofia L. Yangzon; Marissa Alejandria; Razel Nikka M. Hao; Rianna Patricia S. Cruz; Sheila Mae M. Araiza |
| EPI_ISL_584080, EPI_ISL_660565                                                                                                                                                                                                                                                                  | The National Institute of Public Health                                                                                                  | State Veterinary Institute Prague                                                                                              | A, D; H; J; Jirincova; L; Nagy; Novakova; Trnka; Vecerova                                                                                                                                                                                                                                                                                                                                                                                                                                                                                                                                                                                                                                                                               |
| EPI_ISL_417765, EPI_ISL_829376, EPI_ISL_1586410                                                                                                                                                                                                                                                 | The National University Hospital of Iceland                                                                                              | deCODE genetics                                                                                                                | Agnar Helgason; Alma Moller; Arna B Agustsdottir; Arnaldur Gylfason; Asgeir Sigurdsson; Aslaug Jonasdottir; Berglind Eiriksdottir; Bjarni Thorbjornsson; Brynjar O. Jansson; Daniel F Gudbjartsson; Droplaug N Magnusdottir; Elisabet E Gardarsdottir; Emil A Thorarensen; Gardar Sveinbjornsson; Gisli Masson; Gudmundur Georgsson; Gudmundur L Norddahl; Gudrun Sigmundsdottir; Hakon Jonsson; Hannes Eggertsson; Hilma Holm; Ingileif Jonsdottir; Jona                                                                                                                                                                                                                                                                               |

|                                                                                                                      |                                                                                                  |                                                                                                                                |                                                                                                                                                                                                                                                                                                                                                                                                                                                                                                                                                                                                                                                                                                                                                                                                                                                                                                                                                                                                                                                                                                                                                                                                                                                                                                                                                                                                                                                                                                                                                                                                                     |
|----------------------------------------------------------------------------------------------------------------------|--------------------------------------------------------------------------------------------------|--------------------------------------------------------------------------------------------------------------------------------|---------------------------------------------------------------------------------------------------------------------------------------------------------------------------------------------------------------------------------------------------------------------------------------------------------------------------------------------------------------------------------------------------------------------------------------------------------------------------------------------------------------------------------------------------------------------------------------------------------------------------------------------------------------------------------------------------------------------------------------------------------------------------------------------------------------------------------------------------------------------------------------------------------------------------------------------------------------------------------------------------------------------------------------------------------------------------------------------------------------------------------------------------------------------------------------------------------------------------------------------------------------------------------------------------------------------------------------------------------------------------------------------------------------------------------------------------------------------------------------------------------------------------------------------------------------------------------------------------------------------|
|                                                                                                                      |                                                                                                  |                                                                                                                                | Saemundsdottir; Kamilla S Josefsdottir; Karí Stefánsson; Karl G Kristinsson; Kjartan R Gudmundsson; Kristín E Sveinsdottir; Kristín E Sveinsdottir; Louise le Roux; Maney Sveinsdottir; Olafía S Gretarsdottir; Olafía S Gretarsdottir; Olafur T Magnússon; Pall Melsted; Patrick Sulem; Run Fridriksdottir; Solvi Rognvaldsson; Thóra R Gunnarsdottir; Thordur Kristjánsson; Thorolfur Gudnason; Unnur Thorsteinsdottir                                                                                                                                                                                                                                                                                                                                                                                                                                                                                                                                                                                                                                                                                                                                                                                                                                                                                                                                                                                                                                                                                                                                                                                            |
| EPI_ISL_754229, EPI_ISL_754230, EPI_ISL_754231                                                                       | The Republican Research and Practical Center for Epidemiology and Microbiology (RRPCEM)          | WHO National Influenza Centre Russian Federation                                                                               | Anatoly Krasko; Andrey Komissarov; Anna Ivanova; Artem Fadeev; Daria Danilenko; Dmitry Bazhenov; Dmitry Lioznov; Elena Gasich; Elena Nabieva; Kseniya Bazykin; Kirill Bulda; Ksenia Safina; Kseniya Komissarova                                                                                                                                                                                                                                                                                                                                                                                                                                                                                                                                                                                                                                                                                                                                                                                                                                                                                                                                                                                                                                                                                                                                                                                                                                                                                                                                                                                                     |
| EPI_ISL_685983                                                                                                       | Tokyo Metropolitan Institute of Public Health                                                    | Pathogen Genomics Center, National Institute of Infectious Diseases                                                            | Kentaro Itokawa; Makoto Kuroda; Masanori Hashino; Rina Tanaka; Tsuyoshi Sekizuka                                                                                                                                                                                                                                                                                                                                                                                                                                                                                                                                                                                                                                                                                                                                                                                                                                                                                                                                                                                                                                                                                                                                                                                                                                                                                                                                                                                                                                                                                                                                    |
| EPI_ISL_961410                                                                                                       | Toronto Invasive Bacterial Diseases Network                                                      | McMaster University                                                                                                            | Ahmed Draia; Allison McGeer; Andrew G. McArthur; Angel Li; Emily Panousis; Hooman Derakhshani; Jalees Nasir; Kuganya Nirmalarajah; Michael Surette; Patryk Aftanas; Samira Mubareka                                                                                                                                                                                                                                                                                                                                                                                                                                                                                                                                                                                                                                                                                                                                                                                                                                                                                                                                                                                                                                                                                                                                                                                                                                                                                                                                                                                                                                 |
| EPI_ISL_717694, EPI_ISL_717697, EPI_ISL_756363, EPI_ISL_1499115, EPI_ISL_2230682                                     | Trinidad Public Health Laboratory                                                                | Carrington Lab, Department of PreClinical Sciences, Faculty of Medical Sciences, The University of the West Indies             | Adesh Ramsubhag; Arianne Brown-Jordan; Avery Hinds; Chinna Chinnadurai; Christine V. F. Carrington; Christopher Oura; Gabriel Escobar; Jaya Jayaraman; Jerome Foster; Karla Georges; Marsha Ivey; Naresh Nandram; Nikita S. D. Sahadeo; Nuno Faria; Oliver Pybus; Rahul Naidu; Rajini Haraksingh; Risha Singh; Roshan Parasram; Sarah Hill; Stanley Giddings; SueMin Nathaniel; Vernie Ramkissoon                                                                                                                                                                                                                                                                                                                                                                                                                                                                                                                                                                                                                                                                                                                                                                                                                                                                                                                                                                                                                                                                                                                                                                                                                   |
| EPI_ISL_1960624                                                                                                      | UAB Diagnostikos laboratorija                                                                    | National Public Health Surveillance Laboratory                                                                                 | Ana Steponkiene; Danas Baksa; Jelena Razumk; Lukas Vasionis; Lukas Zemaitis; Migle Gabrielaitė; Svajuna Muralyte                                                                                                                                                                                                                                                                                                                                                                                                                                                                                                                                                                                                                                                                                                                                                                                                                                                                                                                                                                                                                                                                                                                                                                                                                                                                                                                                                                                                                                                                                                    |
| EPI_ISL_1908573                                                                                                      | UAB InMedica                                                                                     | Vilnius University Hospital Santaros Klinikos, Center of Laboratory Medicine                                                   | Daniel Naumovas; Dovile Ezerskyte; Gytis Dudas; Ingrida Olen draite; Laimonas Griskevicius; Ligita Raugaite; Mindaugas Stoksus; Monika Katenaite; Rimvydas Norvilas                                                                                                                                                                                                                                                                                                                                                                                                                                                                                                                                                                                                                                                                                                                                                                                                                                                                                                                                                                                                                                                                                                                                                                                                                                                                                                                                                                                                                                                 |
| EPI_ISL_2227166, EPI_ISL_2227183, EPI_ISL_2227191                                                                    | UAB Medicina practica laboratorija                                                               | Lithuanian University of Health Sciences                                                                                       | Arnoldas Pautienius; Dovydas Gecys; Gediminas Alzbutas; Kamile Tamauskaite; Lukas Zemaitis; Vaiva Lesauskaite                                                                                                                                                                                                                                                                                                                                                                                                                                                                                                                                                                                                                                                                                                                                                                                                                                                                                                                                                                                                                                                                                                                                                                                                                                                                                                                                                                                                                                                                                                       |
| EPI_ISL_2179272                                                                                                      | UCSC Genomics Institute                                                                          | UCSC Genomics Institute                                                                                                        | A. Marm Kilpatrick; Angie Hinrichs; Beth Shapiro; Bryan Thornlow; Ciara Wanket; David Haussler; Eric Beraut; Hugh Olsen; Ikenna Anigbogu; Isabel Bjork; Jakob McBroome; Jeremy Sanford; Joshua Kapp; Mark Akeson; Maximilian Haeussler; Michael Stone; Miten Jain; Molly Cassatt-Johnstone; Namrita Dhillon; Russell Corbett-Deitg; Terren Chang; Yatish Turakhia                                                                                                                                                                                                                                                                                                                                                                                                                                                                                                                                                                                                                                                                                                                                                                                                                                                                                                                                                                                                                                                                                                                                                                                                                                                   |
| EPI_ISL_1068997, EPI_ISL_1069078                                                                                     | UCSI University                                                                                  | Institute for Medical Research, Infectious Disease Research Centre, National Institutes of Health, Ministry of Health Malaysia | Azizan MA; Kamel K; Sekaran SD; Suppiah J; Thayan R                                                                                                                                                                                                                                                                                                                                                                                                                                                                                                                                                                                                                                                                                                                                                                                                                                                                                                                                                                                                                                                                                                                                                                                                                                                                                                                                                                                                                                                                                                                                                                 |
| EPI_ISL_1629730, EPI_ISL_1960046                                                                                     | UDEA                                                                                             | Universidad Nacional de Colombia - Laboratorio Genómico One Health                                                             | Andrés F. Cardona-Ríos; Carlos Franco-Muñoz; Carolina Muñoz-Arango; Celeny Ortiz; Daniel O. Maldonado-Pérez; Diego A. Álvarez-Díaz; Eliana Patricia Calvo Tapiero; Hector Alejandro Ruiz-Moreno; Idabely Betancur Ortiz; Jorge E. Osorio; Juan P. Hernandez-Ortiz; Karl A Ciudeneris; Katherine Laiton-Donato; Laura Silvana Perez; Lina M. Hurtado; Marcela Mercado-Reyes; Maria Angélica Maya; Maria Stella López; Rita Almanza Payares; Sandra Ines Cano; Simón Villegas Velásquez                                                                                                                                                                                                                                                                                                                                                                                                                                                                                                                                                                                                                                                                                                                                                                                                                                                                                                                                                                                                                                                                                                                               |
| EPI_ISL_628761, EPI_ISL_648125                                                                                       | UHAS COVID-19 Lab                                                                                | UHAS COVID-19 Lab                                                                                                              | John O. Gyapong and the UHAS COVID-19 Lab Team; Jones Gyamfi; Kwabena O. Duedu; Reuben Ayivor-Djanie                                                                                                                                                                                                                                                                                                                                                                                                                                                                                                                                                                                                                                                                                                                                                                                                                                                                                                                                                                                                                                                                                                                                                                                                                                                                                                                                                                                                                                                                                                                |
| EPI_ISL_1664755, EPI_ISL_1664785                                                                                     | UMMC-Health                                                                                      | WHO National Influenza Centre Russian Federation                                                                               | Andrey Komissarov; Anna Ivanova; Artem Fadeev; Daria Danilenko; Dmitry Lioznov; Elena Nabieva; Georgii Bazykin; Ksenia Safina; Kseniya Komissarova; Maria Pisareva; Maria Timofeeva; Mikhail Bakaev; Tamila Musaeva; Tatiana Platonova; Veronika Eder                                                                                                                                                                                                                                                                                                                                                                                                                                                                                                                                                                                                                                                                                                                                                                                                                                                                                                                                                                                                                                                                                                                                                                                                                                                                                                                                                               |
| EPI_ISL_2171039                                                                                                      | UNIDADE DE PRONTO ATENDIMENTO DE VARZEA PAULISTA UPA II                                          | Instituto Butantan / Mendelics                                                                                                 | Antonio Jorge Martins; Bianca Cechetto Carlos. Mendelics; Bibiana Santos; Claudia Renata dos Santos Barros; Cintia Bittar; David Schlesinger. Hemocentro Ribeirão Preto; Simone Kashima; Debora Botequão Moretti; Elaine Cristina Marqueze; Elaine Vieira dos Santos; Elisângela Chicaroni Mattos; Erika Freitas; Evandra Strazza Rodrigues; Felipe Allan da Silva da Costa; Flavia Aburjaile; Fábio Sossai Possebon; Guilherme Campos; Guilherme Targino Valente; Heidge Fukumasu. USP-Botucatu; Rejane Maria Tommasini Grotto; Helena Lage Ferreira; Instituto Butantan; Dimas Tadeu Covas; Jardeirna de Souza Todão Bernardino; Jayme A. Souza-Neto; Jessika Cristina Chagas Lesbon; Jorge A. Petróli Marchesi; José Salvatore Leister Patané; João Paulo Kitajima; João Pessoa Araújo Jr.; Leila Sabrina Ullmann; Lyzra Paola Oliveira de Lima; Luiz Aurelio de Campos Crispin; Centro de Genômica Funcional da ESALQ; Luiz Lehmann Coutinho; Luiz Carlos Junior de Alcantara; Lívia Sachetto; Maira C. Pereira Parra; Maria Carolina Elias; Marta Giovanetti; Marília Moraes; Maurício Lacerda Nogueira. Prefeitura de Sao Paulo; Melissa Palmieri.; Patricia Akemi Assato; Paula Rahal; Paulo Inacio da Costa; Rafael dos Santos Bezerra; Raquel de Lello Rocha Campos Cassano. NGS Soluções Genômicas; Pilar Drummond Sampaio Corrêa Mariani. FZEA-USP Pirassununga; Mirele Daiana Poletti; Raul Machado Neto; Ricardo Augusto Brassaloti; Ricardo Haddad; Rodrigo Tocantins Calado. FAMERP-SJRP; Cecília Artico Banho; Sandra Coccuzzo Sampaio; Svetoslav Nanev Slavov; Vagner Fonseca; Vincent Louis Viala |
| EPI_ISL_1445065                                                                                                      | UNIDADE MISTA DE TAIACU                                                                          | Instituto Butantan / Mendelics                                                                                                 | Antonio Jorge Martins; Bibiana Santos; Claudia Renata dos Santos Barros; David Schlesinger; Debora Botequão Moretti; Dimas Tadeu Covas; Elaine Cristina Marqueze; Elaine Vieira dos Santos; Erika Freitas; Evandra Strazza Rodrigues; Flavia Aburjaile; José Salvatore Leister Patané; João Paulo Kitajima; Luiz Carlos Junior de Alcantara; Maria Carolina Elias; Marta Giovanetti; Rafael dos Santos Bezerra; Raul Machado Neto; Ricardo Haddad; Rodrigo Tocantins Calado.; Sandra Coccuzzo Sampaio; Simone Kashima; Svetoslav Nanev Slavov; Vagner Fonseca; Vincent Louis Viala                                                                                                                                                                                                                                                                                                                                                                                                                                                                                                                                                                                                                                                                                                                                                                                                                                                                                                                                                                                                                                  |
| EPI_ISL_2136291, EPI_ISL_2136313, EPI_ISL_2136314, EPI_ISL_2136327                                                   | UNIGEM                                                                                           | Universidad Nacional de Colombia - Laboratorio Genómico One Health                                                             | Andrés F. Cardona-Ríos; Carlos Franco-Muñoz; Carolina Muñoz-Arango; Celeny Ortiz; Daniel O. Maldonado-Pérez; Diego A. Álvarez-Díaz; Hector Alejandro Ruiz-Moreno; Idabely Betancur Ortiz; Jorge E. Osorio; Juan P. Hernandez-Ortiz; Karl A Ciudeneris; Katherine Laiton-Donato; Laura Silvana Perez; Lina M. Hurtado; Marcela Mercado-Reyes; Maria Angélica Maya; Maria Stella López; Rita Almanza Payares; Sandra Ines Cano; Simón Villegas Velásquez                                                                                                                                                                                                                                                                                                                                                                                                                                                                                                                                                                                                                                                                                                                                                                                                                                                                                                                                                                                                                                                                                                                                                              |
| EPI_ISL_1715065                                                                                                      | UOC laboratorio di analisi Istituto Giannina Gaslini                                             | TIGEM                                                                                                                          | Antonio Grimaldi Patrizia Annunziata Francesco Panariello Teresa Giuliano Valentina Bouche Chiara Colantuono Lucio Di Filippo Anna Manfredi Marcello Salvi Andrea Ballabio Davide Cacchiarelli                                                                                                                                                                                                                                                                                                                                                                                                                                                                                                                                                                                                                                                                                                                                                                                                                                                                                                                                                                                                                                                                                                                                                                                                                                                                                                                                                                                                                      |
| EPI_ISL_2155546                                                                                                      | UPLB Covid-19 Molecular Diagnostic Laboratory                                                    | Philippine Genome Center                                                                                                       | Alethea R. de Guzman; Anna Ong-Lim; Arianne A. Zamora; Asia Louisa U. Chong; Benedict A. Maralit; Candice Francheska B. Tambaoan; Carlo M. Lapid; Celia Carlos; Devon Ray Pacial; Edsel Maurice Salvaña; El King D. Morado; Eva Maria Cutiongo-de-la Paz; Francis A. Tablizo; Irish Coleen A. Asin; Jaime C. Montoya; Jan Michael C. Yap; Jo-Hannah S. Llamas; John Q. Wong; Joshua Gregor A. Dizon; Juan Antonio R. Magalang; Karol Sophia Agape R. Padilla; Kenneth M. Kim; Kris P. Punayan; Marc Edsel C. Ayes; Marc Jerrone R. Castro; Maria Rosario Singh-Vergeire and Cynthia P. Saloma; Maria Sofia L. Yangzon; Marissa Alejandria; Razel Nikka M. Hao; Rianna Patricia S. Cruz; Sheila Mae M. Araza                                                                                                                                                                                                                                                                                                                                                                                                                                                                                                                                                                                                                                                                                                                                                                                                                                                                                                         |
| EPI_ISL_681988                                                                                                       | UPMC Clinical Microbiology Laboratory                                                            | Microbial Genomic Epidemiology Laboratory, University of Pittsburgh                                                            | Chinelo Ezeonwuku; Dan Snyder; Jane W. Marsh; Kady D. Waggle; Lee H. Harrison; Marissa P. Griffith; Mustapha M. Mustapha; Stephanie L. Mitchell; Vatsala R. Srinivasa; Vaughn S. Cooper                                                                                                                                                                                                                                                                                                                                                                                                                                                                                                                                                                                                                                                                                                                                                                                                                                                                                                                                                                                                                                                                                                                                                                                                                                                                                                                                                                                                                             |
| EPI_ISL_570583, EPI_ISL_1069251, EPI_ISL_1341573, EPI_ISL_1526916, EPI_ISL_1616815, EPI_ISL_2037545, EPI_ISL_2161820 | see above                                                                                        | UW Virology Lab                                                                                                                | Alexander Greninger; Amin Addetia; Hong Xie; Keith R Jerome; Lasata Shrestha; Meei-Li Huang; Michelle Lin; Nathan Breit; Noah Baker; Noah R. Baker; Patrick Mathias; Pavitra Roychoudhury; Ricardo Perez; Robert J. Livingston; Saraswathi Sathees; Sean Ellis; Shah Mohamed Bakhsh; Tien V. Nguyen; Victoria M Rachleff                                                                                                                                                                                                                                                                                                                                                                                                                                                                                                                                                                                                                                                                                                                                                                                                                                                                                                                                                                                                                                                                                                                                                                                                                                                                                            |
| EPI_ISL_734767, EPI_ISL_734865, EPI_ISL_734884, EPI_ISL_735043, EPI_ISL_738229                                       | UZ Leuven, National Reference Laboratory for Coronaviruses, Laboratory Medicine, Leuven, Belgium | KU Leuven, Rega Institute, Clinical and Epidemiological Virology                                                               | Bert Vanmechelen; Joan Marti-Carerras; Piet Maes; Tony Wawina-Bokalanga                                                                                                                                                                                                                                                                                                                                                                                                                                                                                                                                                                                                                                                                                                                                                                                                                                                                                                                                                                                                                                                                                                                                                                                                                                                                                                                                                                                                                                                                                                                                             |
| EPI_ISL_737946, EPI_ISL_737964, EPI_ISL_737979, EPI_ISL_738004                                                       | Uganda Central Public Health Lab and Uganda Virus Research Institute                             | MRC/UVRI & LSHTM Uganda Research Unit                                                                                          | Dan Lule Bugembe; Matthew Cotten; My V.T. Phan; Pontiano Kaleebu et al.                                                                                                                                                                                                                                                                                                                                                                                                                                                                                                                                                                                                                                                                                                                                                                                                                                                                                                                                                                                                                                                                                                                                                                                                                                                                                                                                                                                                                                                                                                                                             |
| EPI_ISL_451190, EPI_ISL_451194, EPI_ISL_451199                                                                       | Uganda Virus Research Institute                                                                  | MRC/UVRI & LSHTM Uganda Research Unit                                                                                          | Beatrice Dhaala; Dan Lule Bugembe; Deogratius Ssemwanga; Henry Kyobe; Henry Mwebesa; Jane Aceng; John Kiyaga; Jonas Lexow; Julius Lutwama; Matthew Cotten; My V.T. Phan; Phionah Tushabe; Pontiano Kaleebu; Stephen Balinandi                                                                                                                                                                                                                                                                                                                                                                                                                                                                                                                                                                                                                                                                                                                                                                                                                                                                                                                                                                                                                                                                                                                                                                                                                                                                                                                                                                                       |
| EPI_ISL_1351489, EPI_ISL_1351494, EPI_ISL_1351498                                                                    | Unidad de Investigaci3n M3dica de Yucat3n (UIMY)                                                 | Unidad de Genomica Avanzada                                                                                                    | Alejandro Sanchez-Flores; Alfredo Herrera-Estrella; Alicia Oceana-Mondragon; Angel Gustavo Salas-Lais; Bernardo Martinez-Miguel; Blanca Taboada; Brenda Irasema Maldonado-Meza; Carla Ivon Herrera-Najera; Carlos F. Arias; Celia Boukadida; Clara Esperanza Santacruz-Tinoco; Concepcion Grajales-Muniz; Consorcio Mexicano de Vigilancia Genomica (CoVIGen-Mex). Authors (in alphabetical order): Julio Elias Alvarado-Yaah; Fernando Fontove-Herrera; Francisco Pulido; Gloria Elena Espinoza-Ayala; Gloria Maria Molina-Salinas; Gloria Yazquez; Hector Esteban Paz-Juarez; Hector                                                                                                                                                                                                                                                                                                                                                                                                                                                                                                                                                                                                                                                                                                                                                                                                                                                                                                                                                                                                                              |

|                                                                                                                                                                       |                                                                                                    |                                                                                                                        |                                                                                                                                                                                                                                                                                                                                                                                                                                                                                                                                                                                                                                                                                                                                                                                                                                                                                                                                                                                                                                                      |
|-----------------------------------------------------------------------------------------------------------------------------------------------------------------------|----------------------------------------------------------------------------------------------------|------------------------------------------------------------------------------------------------------------------------|------------------------------------------------------------------------------------------------------------------------------------------------------------------------------------------------------------------------------------------------------------------------------------------------------------------------------------------------------------------------------------------------------------------------------------------------------------------------------------------------------------------------------------------------------------------------------------------------------------------------------------------------------------------------------------------------------------------------------------------------------------------------------------------------------------------------------------------------------------------------------------------------------------------------------------------------------------------------------------------------------------------------------------------------------|
|                                                                                                                                                                       |                                                                                                    |                                                                                                                        | Montoya-Fuentes; Helen Haydee Fernanda Ramirez-Plascencia; Jorge Ivan Salinal-Navarez; Jose Antonio Enciso-Moreno; Jose Esteban Munoz-Medina; Jose de Jesus Nunez-Contreras; Juan Bautista Chale-Dzul; Luis Alberto Ochoa-Carrera; Margarita Matias-Florentino; Maria Guadalupe Santiago-Mauricio; Maria Guadalupe de Jesus Mireles-Rivera; Nelly Selem-Mojica; Pavel Isa; Ricardo Grande; Santiago Avila-Rios; Victor Hugo Borja-Aburto                                                                                                                                                                                                                                                                                                                                                                                                                                                                                                                                                                                                             |
| EPI_ISL_1279315, EPI_ISL_1279366                                                                                                                                      | Unidad de Investigación Biomédica de Zacatecas (UIBZ)                                              | Instituto Nacional de Enfermedades Respiratorias (INER); Centro de Investigación en Enfermedades Infecciosas (CIENI)   | Alejandro Sanchez-Flores; Alfredo Herrera-Estrella; Alicia Ocaña-Mondragón; Angel Gustavo Salas-Lais; Bernardo Martínez-Miguel; Blanca Taboada; Brenda Irasema Maldonado-Meza; Carla Ivón Herrera-Najera; Carlos F. Arias; Celia Boukadida; Clara Esperanza Santacruz-Tinoco; Concepción Grajales-Muñiz; Consorcio Mexicano de Vigilancia Genómica (CoViGen-Mex). Authors (in alphabetical order): Julio Elias Alvarado-Yaah; Fernando Fontove-Herrera; Francisco Pulido; Gloria Elena Espinoza-Ayala; Gloria María Molina-Salinas; Gloria Vazquez; Hector Esteban Paz-Juárez; Hector Montoya-Fuentes; Helen Haydee Fernanda Ramirez-Plascencia; Jorge Ivan Salinal-Navarez; José Antonio Enciso-Moreno; José Esteban Muñoz-Medina; José de Jesús Nuñez-Contreras; Juan Bautista Chale-Dzul; Luis Alberto Ochoa-Carrera; Margarita Matias-Florentino; Maria Guadalupe Santiago-Mauricio; Maria Guadalupe de Jesús Mireles-Rivera; Nelly Sélem-Mojica; Pavel Isa; Ricardo Grande; Santiago Ávila-Rios; Victor Hugo Borja-Aburto                       |
| EPI_ISL_2091246, EPI_ISL_2091254                                                                                                                                      | Unidad de Investigación Médica de Yucatán (UIMY)                                                   | Centro de Investigación en Enfermedades Infecciosas (CIENI), Instituto Nacional de Enfermedades Respiratorias (INER)   | Alejandro Sanchez-Flores; Alfredo Herrera-Estrella; Alicia Ocaña-Mondragón; Angel Gustavo Salas-Lais; Bernardo Martínez-Miguel; Blanca Taboada; Brenda Irasema Maldonado-Meza; Carla Ivón Herrera-Najera; Carlos F. Arias; Celia Boukadida; Clara Esperanza Santacruz-Tinoco; Concepción Grajales-Muñiz; Consorcio Mexicano de Vigilancia Genómica (CoViGen-Mex). Authors (in alphabetical order): Julio Elias Alvarado-Yaah; Célida Duque Molina; Fernando Fontove-Herrera; Francisco Pulido; Gloria Elena Espinoza-Ayala; Gloria María Molina-Salinas; Gloria Vazquez; Hector Esteban Paz-Juárez; Hector Montoya-Fuentes; Helen Haydee Fernanda Ramirez-Plascencia; José Antonio Enciso-Moreno; José Esteban Muñoz-Medina; José de Jesús Nuñez-Contreras; Juan Bautista Chale-Dzul; Luis Alberto Ochoa-Carrera; Margarita Matias-Florentino; Maria Guadalupe Santiago-Mauricio; Maria Guadalupe de Jesús Mireles-Rivera; Nelly Sélem-Mojica; Pavel Isa; Ricardo Grande; Santiago Ávila-Rios; Victor Eduardo Garcia-Arias; Victor Hugo Borja-Aburto |
| EPI_ISL_1279612                                                                                                                                                       | Unidad de Investigación Médica de Yucatán (UIMY)                                                   | Instituto Nacional de Enfermedades Respiratorias (INER); Centro de Investigación en Enfermedades Infecciosas (CIENI)   | Alejandro Sanchez-Flores; Alfredo Herrera-Estrella; Alicia Ocaña-Mondragón; Angel Gustavo Salas-Lais; Bernardo Martínez-Miguel; Blanca Taboada; Brenda Irasema Maldonado-Meza; Carla Ivón Herrera-Najera; Carlos F. Arias; Celia Boukadida; Clara Esperanza Santacruz-Tinoco; Concepción Grajales-Muñiz; Consorcio Mexicano de Vigilancia Genómica (CoViGen-Mex). Authors (in alphabetical order): Julio Elias Alvarado-Yaah; Fernando Fontove-Herrera; Francisco Pulido; Gloria Elena Espinoza-Ayala; Gloria María Molina-Salinas; Gloria Vazquez; Hector Esteban Paz-Juárez; Hector Montoya-Fuentes; Helen Haydee Fernanda Ramirez-Plascencia; Jorge Ivan Salinal-Navarez; José Antonio Enciso-Moreno; José Esteban Muñoz-Medina; José de Jesús Nuñez-Contreras; Juan Bautista Chale-Dzul; Luis Alberto Ochoa-Carrera; Margarita Matias-Florentino; Maria Guadalupe Santiago-Mauricio; Maria Guadalupe de Jesús Mireles-Rivera; Nelly Sélem-Mojica; Pavel Isa; Ricardo Grande; Santiago Ávila-Rios; Victor Hugo Borja-Aburto                       |
| EPI_ISL_2101430                                                                                                                                                       | Unidade de apoio ao diagnóstico da COVID - UNADIG                                                  | Bioinformatics Laboratory / LNCC                                                                                       | Alessandra P Lamarca; Alexandra L Gerber; Amílcar Tanuri; Ana Paula de C Guimarães; Ana Tereza R Vasconcelos; Andrea Cony Cavalcanti; Caio Luiz Pereira Ribeiro; Cassia Alves; Cintia Policarpo; Claudia Maria Braga de Mello; Cristiane Gomes da Silva; Diana Mariani; Douglas Terra Machado; Flavio Dias da Silva; Gleidson da Silva de Oliveira; Leandro Magalhaes de Souza; Liliane Cavalcante; Luiz G P de Almeida; Marcio Henrique de Oliveira Garcia; Mario Sergio Ribeiro; Ronaldo da Silva F Jr; Silvia Carvalho                                                                                                                                                                                                                                                                                                                                                                                                                                                                                                                            |
| EPI_ISL_411951                                                                                                                                                        | Unit for Laboratory Development and Technology Transfer, Public Health Agency of Sweden            | Unit for Laboratory Development and Technology Transfer, Public Health Agency of Sweden                                | Appelberg, S.; Bengner, M.; Brave, A.; Lind Karlberg, M.; Lindsjo, O.; Montell, V.; Muradrasoli; Palmerus, M.; S. and Tegmark-Wisell, K.                                                                                                                                                                                                                                                                                                                                                                                                                                                                                                                                                                                                                                                                                                                                                                                                                                                                                                             |
| EPI_ISL_1299860, EPI_ISL_1299861, EPI_ISL_1299871, EPI_ISL_1299882, EPI_ISL_1299884                                                                                   | Unit of lab surveillance of viral emerging diseases, National Lab of Influenza                     | Respiratory Virus Unit, National Infection Service, Public Health England                                              | Iris Hasibra; PHE Covid Sequencing Team; Prof Albana Fico; Prof Silvia Bino                                                                                                                                                                                                                                                                                                                                                                                                                                                                                                                                                                                                                                                                                                                                                                                                                                                                                                                                                                          |
| EPI_ISL_812319, EPI_ISL_812560, EPI_ISL_812577, EPI_ISL_812594, EPI_ISL_812605, EPI_ISL_831772, EPI_ISL_831781, EPI_ISL_831828                                        | see above                                                                                          | United States Air Force School of Aerospace Medicine                                                                   | Amanda Javorina; Anthony Fries; Clarise Starr; Elizabeth Macias; Jennifer Meyer; Sarah Purves; William Gruner                                                                                                                                                                                                                                                                                                                                                                                                                                                                                                                                                                                                                                                                                                                                                                                                                                                                                                                                        |
| EPI_ISL_1020143                                                                                                                                                       | University Clinic of Nephrology- Skopje                                                            | Research Center for Genetic Engineering and Biotechnology "Georgi D. Efremov", Macedonian Academy of Sciences and Arts | Aleksandar J. Dimovski; Dijana Plasheska-Karanfilska; Gjorgji Bozinovski; Milena Jakimovska; Predrag Noveski                                                                                                                                                                                                                                                                                                                                                                                                                                                                                                                                                                                                                                                                                                                                                                                                                                                                                                                                         |
| EPI_ISL_812967                                                                                                                                                        | University Clinical Research Center, University of Sciences                                        | University Clinical Research Center, University of Sciences                                                            | A.A.; Bane, S.; Dao, S.; Diakite, M.; Diarra, B.; Doumbia, S.; Guindo, I.; Iknane; Kone, A.                                                                                                                                                                                                                                                                                                                                                                                                                                                                                                                                                                                                                                                                                                                                                                                                                                                                                                                                                          |
| EPI_ISL_920759, EPI_ISL_1248434                                                                                                                                       | University College London Hospital                                                                 | COVID-19 Genomics UK (COG-UK) Consortium                                                                               | Catherine Houlihan; Dan Frampton; Dr Catherine Houlihan; Dr Daniel Frampton; Dr Judith Heaney; Dr Moira Spyer; Dr Paul Grant and Dr Eleni Nastouli; Judith Heaney; Matthew Byott; Moira Spyer and Eleni Nastouli; Stuart Kirk                                                                                                                                                                                                                                                                                                                                                                                                                                                                                                                                                                                                                                                                                                                                                                                                                        |
| EPI_ISL_982798, EPI_ISL_982814, EPI_ISL_982990                                                                                                                        | University Health Network/Mount Sinai Hospital Department of Microbiology                          | Ontario Institute for Cancer Research                                                                                  | Aimee Paterson; Allison McGeer; Angel Liu; Bernard Lam; Cassandra Bergwerff; Ilinca Lungu; Jared T. Simpson; Javier Hernandez; Jeff Wrana; Jessica Bourke; Kin Chan; Kuganya Nirmalarajah; Laurence Pelletier; Lawrence E. Heisler; Lubaina Kothari; Marc Mazzone; Marie-Ming Aynaud; Michael Laszloffy; Patryk Aftanas; Paul Krzyzanowski; Richard de Borja; Samira Mubareka; Seda Barutcu; Tony Mazzulli                                                                                                                                                                                                                                                                                                                                                                                                                                                                                                                                                                                                                                           |
| EPI_ISL_1273672                                                                                                                                                       | University Hospital Basel, Clinical Virology                                                       | University Hospital Basel, Clinical Bacteriology                                                                       | Adrian Egli; Alfredo Mari; Hans Hirsch; Helena MB Seth-Smith; Julia Bielicki; Karoline Leuzinger; Madlen Stange; Manuel Battegay; Tim Roloff                                                                                                                                                                                                                                                                                                                                                                                                                                                                                                                                                                                                                                                                                                                                                                                                                                                                                                         |
| EPI_ISL_454581                                                                                                                                                        | University Hospital for Infectious Diseases "Dr. Fran Mihajević", Research Unit                    | University of Zagreb, Centre for research and knowledge transfer in biotechnology                                      | Anamarija Slavic; Ivan-Christian Kurolic; Jelena Ivancic Jelecki                                                                                                                                                                                                                                                                                                                                                                                                                                                                                                                                                                                                                                                                                                                                                                                                                                                                                                                                                                                     |
| EPI_ISL_1118298                                                                                                                                                       | University Hospital of Northern Norway, Department for Microbiology and Infectious Disease Control | Norwegian Institute of Public Health, Department of Virology                                                           | Atiya R Ali; Debec Nadia; Engebretsen Serina Beate; Garcia Llorente Ignacio; Hilde Elshaug; Hilde Vollan; Kamilla Heddeland Instefjord; Karoline Bragstad; Kathrine Stene-Johansen; Marie Paulsen Madsen; Olav Hungnes; Pedersen Benedikte Nevjen; Rasmus Riis Kopperud                                                                                                                                                                                                                                                                                                                                                                                                                                                                                                                                                                                                                                                                                                                                                                              |
| EPI_ISL_953504, EPI_ISL_953850, EPI_ISL_1084768, EPI_ISL_1448611, EPI_ISL_1622244, EPI_ISL_2104535, EPI_ISL_2104652, EPI_ISL_2214284                                  | see above                                                                                          | University Hospitals of Geneva, Laboratory of Virology                                                                 | Ana Rita Goncalves; Deborah Penet; Emmanouil Dermitzakis; Henri Pegeot; Ioannis Xenarios; Keith Harshman; Laurent Kaiser; Lorenzo Cerutti; Melyssa Elies; Samuel Cordey                                                                                                                                                                                                                                                                                                                                                                                                                                                                                                                                                                                                                                                                                                                                                                                                                                                                              |
| EPI_ISL_776217                                                                                                                                                        | University Medical Center Hamburg Eppendorf                                                        | Heinrich Pette Institute, Leibniz Institute for Experimental Virology                                                  | Adam Grundhoff; Alexis Robitaille; Johannes Knobloch; Martin Aepfelbacher; Nicole Fischer; Thomas Günther                                                                                                                                                                                                                                                                                                                                                                                                                                                                                                                                                                                                                                                                                                                                                                                                                                                                                                                                            |
| EPI_ISL_671495                                                                                                                                                        | University of Debrecen, Department of Medical Microbiology                                         | National Laboratory of Virology, Szentágotthai Research Centre                                                         | Balázs Somogyi; Brigitta Zana; Endre Gábor Tóth; Eszter Csoma; Ferenc Jakab; Gábor Kemenesi                                                                                                                                                                                                                                                                                                                                                                                                                                                                                                                                                                                                                                                                                                                                                                                                                                                                                                                                                          |
| EPI_ISL_2100451                                                                                                                                                       | University of Health Sciences                                                                      | Quadram Institute Bioscience                                                                                           | Alam Khan; Alexander J Trotter; Alison E. Mather; Almira Shafiq; Alp Aydin; Ana P. Tedim; Anastasia Kolyva; Andrew Bell; Andrew J. Page; Claire Stuart; Dave J. Baker; Gemma L. Kay; Javed Akram; John Wain; Justin O'Grady; Leonardo de Oliveira Martins; Lizzie Meadows; Maria Diaz; Mark Webber; Muhammad Bilal Sarwar; Muhammad Roman; Muhammed Yasir; Nabil-Fareed Alikhan; Nadeem Afzal; Ngozi Elumogo; Nicholas M. Thomson; Rachael Stanley; Rachel Gilroy; Reenesh Prakash; Samir Dervisevic; Samuel Bloomfield; Shah Jahan; Sidra-tul-muntaha; Steven Rudder; Thanh Le-Viet                                                                                                                                                                                                                                                                                                                                                                                                                                                                 |
| EPI_ISL_2003289                                                                                                                                                       | University of Liège COVID-19 testing center                                                        | GIGA Medical Genomics                                                                                                  | Bouchra Boujemla; Cécile Meex; Keith Durkin; Maria Artesi; Marie-Pierre Hayette; Nathalie Renotte; Pierrette Melin; Raphaël Boreux; Sébastien Bontems; Vincent Bours                                                                                                                                                                                                                                                                                                                                                                                                                                                                                                                                                                                                                                                                                                                                                                                                                                                                                 |
| EPI_ISL_896375                                                                                                                                                        | University of Medicine and Pharmacy of Craiova                                                     | "Stefan cel Mare" University Metagenomics Lab                                                                          | Gheorghita Roxana; Lobiuc Andrei                                                                                                                                                                                                                                                                                                                                                                                                                                                                                                                                                                                                                                                                                                                                                                                                                                                                                                                                                                                                                     |
| EPI_ISL_1527074, EPI_ISL_1527237, EPI_ISL_1628496                                                                                                                     | University of Mississippi Medical Center, Department of Pathology                                  | University of Mississippi Medical Center, Molecular and Genomics Core Facility                                         | Ashley C. Johnson; D. Ashley Robinson; Ithiel J. Frame; Krishna K. Ayyalasomayajula; Michael R. Garrett                                                                                                                                                                                                                                                                                                                                                                                                                                                                                                                                                                                                                                                                                                                                                                                                                                                                                                                                              |
| EPI_ISL_955155, EPI_ISL_955210, EPI_ISL_955229, EPI_ISL_1016508, EPI_ISL_1016842, EPI_ISL_1016843, EPI_ISL_1016884, EPI_ISL_1016885, EPI_ISL_1016969, EPI_ISL_1016970 | see above                                                                                          | University of Sarajevo, Veterinary Faculty, Laboratory for Molecular Diagnostic and Research Laboratory                | Alic-Seho A.; Alic-Seho A.; Ali-Seho A.; Goletic S.; Goletic T.; Goletic Š.; Goleti T.; Goleti Š.; Hodzic A.; Hodžic A.; Hodži A.; Jazic A.; Jažic A.; Jaži A.; Nicević M.; Nicevi M.; Sabic E.; Softic A.; Softi A.; Terzic I.; Terzic I.; Terzi I.; Sabic E.; Sabi E.                                                                                                                                                                                                                                                                                                                                                                                                                                                                                                                                                                                                                                                                                                                                                                              |
| EPI_ISL_501135                                                                                                                                                        | University of Washington Virology Lab                                                              | University of Washington Virology Lab                                                                                  | Alexander Greninger; Amin Addetia; Hong Xie; Keith R Jerome; Lasata Shrestha; Meei-Li Huang; Pavitra Roychoudhury; Trung Nguyen; Victoria M Rachleff                                                                                                                                                                                                                                                                                                                                                                                                                                                                                                                                                                                                                                                                                                                                                                                                                                                                                                 |
| EPI_ISL_480376, EPI_ISL_2225582                                                                                                                                       | University of Wisconsin-Madison AIDS Vaccine Research Laboratories                                 | University of Wisconsin-Madison AIDS Vaccine Research Laboratories                                                     | Gage Moreno; Katarina Braun; et al. AIDS Vaccine Research Laboratories                                                                                                                                                                                                                                                                                                                                                                                                                                                                                                                                                                                                                                                                                                                                                                                                                                                                                                                                                                               |

|                                                                                                                                                                                                                                                                        |                                                                              |                                                                                                                                    |                                                                                                                                                                                                                                                                                                                                                                                                                                                                                                                                                                                                                                                                                                                                                                                                                                                                                                                                                                                                                                                                                                                                                                                                                                                                                                                                                                                                                                                                                                                                                                                                                      |
|------------------------------------------------------------------------------------------------------------------------------------------------------------------------------------------------------------------------------------------------------------------------|------------------------------------------------------------------------------|------------------------------------------------------------------------------------------------------------------------------------|----------------------------------------------------------------------------------------------------------------------------------------------------------------------------------------------------------------------------------------------------------------------------------------------------------------------------------------------------------------------------------------------------------------------------------------------------------------------------------------------------------------------------------------------------------------------------------------------------------------------------------------------------------------------------------------------------------------------------------------------------------------------------------------------------------------------------------------------------------------------------------------------------------------------------------------------------------------------------------------------------------------------------------------------------------------------------------------------------------------------------------------------------------------------------------------------------------------------------------------------------------------------------------------------------------------------------------------------------------------------------------------------------------------------------------------------------------------------------------------------------------------------------------------------------------------------------------------------------------------------|
| EPI_ISL_977341, EPI_ISL_977421, EPI_ISL_977469                                                                                                                                                                                                                         | University of Zambia, School of Veterinary Medicine                          | UNZAVET and PATH                                                                                                                   | Daniel Bridges; Mulenga Mwenda-Chimfwembe; Ngonda Saasa                                                                                                                                                                                                                                                                                                                                                                                                                                                                                                                                                                                                                                                                                                                                                                                                                                                                                                                                                                                                                                                                                                                                                                                                                                                                                                                                                                                                                                                                                                                                                              |
| EPI_ISL_2189378                                                                                                                                                                                                                                                        | University of the Philippines National Institutes of Health (UP NIH)         | Philippine Genome Center                                                                                                           | Alethea R. de Guzman; Anna Ong-Lim; Arienne A. Zamora; Asia Louisa U. Chong; Benedict A. Maralit; Candice Francheska B. Tambaoan; Carlo M. Lapid; Celia Carlos; Devon Ray Pacial; Edsel Maurice Salvaña; El King D. Morado; Elcid Aaron R. Pangilinan; Eva Maria Cutiongo-co-de la Paz; Francis A. Tablizo; Irish Coleen A. Asin; Jaime C. Montoya; Jan Michael C. Yap; Jo-Hannah S. Llamas; John Q. Wong; Joshua Gregor A. Dizon; Juan Antonio R. Magalang; Karol Sophia Agape R. Padilla; Kenneth M. Kim; Kris P. Punayan; Marc Edsel C. Ayes; Maria Rosario Singh-Vergeire and Cynthia P. Saloma; Maria Sofia L. Yangzon; Marissa Alejandria; Razel Nikka M. Hao; Renato Jacinto Q. Mantaring; Rianna Patricia S. Cruz; Sheila Mae M. Araiza                                                                                                                                                                                                                                                                                                                                                                                                                                                                                                                                                                                                                                                                                                                                                                                                                                                                      |
| EPI_ISL_2200646                                                                                                                                                                                                                                                        | UniversitätsSpital Zürich                                                    | Institute of Medical Virology                                                                                                      | Alexandra Trkola; Annette Audigé; Cyril Shah; Gabriela Ziltener; Guido Bloemberg; Jon Huder; Jürg Böni; Kevin Steiner; Maria Grünberg; Maryam Zahreri; Michael Huber; Riccarda Capaul; Stefan Schmutz; Verena Kufner                                                                                                                                                                                                                                                                                                                                                                                                                                                                                                                                                                                                                                                                                                                                                                                                                                                                                                                                                                                                                                                                                                                                                                                                                                                                                                                                                                                                 |
| EPI_ISL_1355349, EPI_ISL_1355363                                                                                                                                                                                                                                       | Universitätsmedizin Mannheim                                                 | Robert Koch Institute                                                                                                              |                                                                                                                                                                                                                                                                                                                                                                                                                                                                                                                                                                                                                                                                                                                                                                                                                                                                                                                                                                                                                                                                                                                                                                                                                                                                                                                                                                                                                                                                                                                                                                                                                      |
| EPI_ISL_1700906, EPI_ISL_2081701, EPI_ISL_2081715                                                                                                                                                                                                                      | Utah Public Health Laboratory                                                | Utah Public Health Laboratory                                                                                                      | Erin L. Young; Kelly F. Oakeson; Tara Gallagher                                                                                                                                                                                                                                                                                                                                                                                                                                                                                                                                                                                                                                                                                                                                                                                                                                                                                                                                                                                                                                                                                                                                                                                                                                                                                                                                                                                                                                                                                                                                                                      |
| EPI_ISL_1678033                                                                                                                                                                                                                                                        | VA-Division of Consolidated Laboratory Services                              | Centers for Disease Control and Prevention Division of Viral Diseases, Pathogen Discovery                                          | Alison Laufer Halpin; Ben L. Rambo-Martin; Clinton R. Paden; Dakota Howard; Darlene Wagner; Dave Wentworth; Dhvani Batra; Jasmine Padilla; Justin Lee; Katie Dillon; Krista Queen; Kristen Knipe; Kristine Lacey; Mark Burroughs; Matthew Schmeer; Mili Sheth; Peter Cook; Sam Shepard; Sarah Nobles; Shoshona Le; Suxiang Tong; Vivien Dugan; Yvette Unoarumhi                                                                                                                                                                                                                                                                                                                                                                                                                                                                                                                                                                                                                                                                                                                                                                                                                                                                                                                                                                                                                                                                                                                                                                                                                                                      |
| EPI_ISL_424907                                                                                                                                                                                                                                                         | VA-Division of Consolidated Laboratory Services                              | Pathogen Discovery, Respiratory Viruses Branch, Division of Viral Diseases, Centers for Disease Control and Prevention             | Alison S. Laufer Halpin; Anna Uehara; Christopher A. Elkins; Clinton R. Paden; Haibin Wang; Jing Zhang; Krista Queen; Mary S. Keckler; Suxiang Tong; Yan Li; Ying Tao                                                                                                                                                                                                                                                                                                                                                                                                                                                                                                                                                                                                                                                                                                                                                                                                                                                                                                                                                                                                                                                                                                                                                                                                                                                                                                                                                                                                                                                |
| EPI_ISL_1528520                                                                                                                                                                                                                                                        | VI-US Virgin Islands Department of Health                                    | Centers for Disease Control and Prevention Division of Viral Diseases, Pathogen Discovery                                          | Alison Laufer Halpin; Ben L. Rambo-Martin; Clinton R. Paden; Dakota Howard; Darlene Wagner; Dave Wentworth; Dhvani Batra; Jasmine Padilla; Justin Lee; Katie Dillon; Krista Queen; Kristen Knipe; Kristine Lacey; Mark Burroughs; Matthew Schmeer; Mili Sheth; Peter Cook; Sam Shepard; Sarah Nobles; Shoshona Le; Suxiang Tong; Vivien Dugan; Yvette Unoarumhi                                                                                                                                                                                                                                                                                                                                                                                                                                                                                                                                                                                                                                                                                                                                                                                                                                                                                                                                                                                                                                                                                                                                                                                                                                                      |
| EPI_ISL_454649                                                                                                                                                                                                                                                         | VI-US Virgin Islands Department of Health                                    | Pathogen Discovery, Respiratory Viruses Branch, Division of Viral Diseases, Centers for Disease Control and Prevention             | Anna Uehara; Bettina Bankamp; Clinton R. Paden; Haibin Wang; Jing Zhang; Krista Queen; Suxiang Tong; Yan Li; Ying Tao; Zachary Weiner                                                                                                                                                                                                                                                                                                                                                                                                                                                                                                                                                                                                                                                                                                                                                                                                                                                                                                                                                                                                                                                                                                                                                                                                                                                                                                                                                                                                                                                                                |
| EPI_ISL_1966556, EPI_ISL_1967198                                                                                                                                                                                                                                       | VIGILANCIA EM SAUDE SAE VIGILANCIA EPIDEMIOLOGICA                            | Instituto Butantan / Mendelics                                                                                                     | Antonio Jorge Martins; Bianca Cechetto Carlos. Mendelics: Bibiana Santos; Claudia Renata dos Santos Barros; Cintia Bittar; David Schlesinger. Hemocentro Ribeirão Preto: Simone Kashima; Debora Botequiu Moretti; Elaine Cristina Marquize; Elaine Vieira dos Santos; Elisângela Chicaroni Mattos; Erika Freitas; Evandra Strazza Rodrigues; Felipe Allan da Silva da Costa; Flavia Aburjaille; Fábio Sossai Possebon; Guilherme Campos; Guilherme Targino Valente; Heidge Fukumasu. USP-Botucatu: Rejane Maria Tommasini Grotto; Helena Lage Ferreira; Instituto Butantan: Dimas Tadeu Covas; Jardimela de Souza Todao Bernardino; Jayme A. Souza-Neto; Jessika Cristina Chagas Lesbon; Jorge A. Petrolí Marchesi; José Salvatore Leister Patané; João Paulo Kitajima; João Pessoa Araújo Jr.; Leila Sabrina Ullmann; Loyze Paola Oliveira de Lima; Luiz Aurelio de Campos Crispin. Centro de Genômica Funcional da ESALQ: Luiz Lehmann Coutinho; Luiz Carlos Junior de Alcantara; Lívia Sacchetto; Maísa C. Pereira Parra; Maria Carolina Elias; Marta Giovanetti; Marília Moraes; Maurício Lacerda Nogueira. Prefeitura de Sao Paulo: Melissa Palmieri.; Patricia Akemi Assato; Paula Rahal; Paulo Inacio da Costa; Rafael dos Santos Bezerra; Raquel de Lello Rocha Campos Cassano. NGS Soluções Genômicas: Pilar Drummond Sampaio Corrêa Mariani. FZEA-USP Pirassununga: Mirele Daiana Poleti; Raul Machado Neto; Ricardo Augusto Brassaloti; Ricardo Haddad; Rodrigo Tocantins Calado. FAMERP-SJRP: Cecília Artico Banho; Sandra Coccuzzo Sampaio; Svetoslav Nanev Slavov; Vagner Fonseca; Vincent Louis Viala |
| EPI_ISL_1966064                                                                                                                                                                                                                                                        | VIGILANCIA EPIDEMIOLOGICA                                                    | Instituto Butantan / Mendelics                                                                                                     | Antonio Jorge Martins; Bianca Cechetto Carlos. Mendelics: Bibiana Santos; Claudia Renata dos Santos Barros; Cintia Bittar; David Schlesinger. Hemocentro Ribeirão Preto: Simone Kashima; Debora Botequiu Moretti; Elaine Cristina Marquize; Elaine Vieira dos Santos; Elisângela Chicaroni Mattos; Erika Freitas; Evandra Strazza Rodrigues; Felipe Allan da Silva da Costa; Flavia Aburjaille; Fábio Sossai Possebon; Guilherme Campos; Guilherme Targino Valente; Heidge Fukumasu. USP-Botucatu: Rejane Maria Tommasini Grotto; Helena Lage Ferreira; Instituto Butantan: Dimas Tadeu Covas; Jardimela de Souza Todao Bernardino; Jayme A. Souza-Neto; Jessika Cristina Chagas Lesbon; Jorge A. Petrolí Marchesi; José Salvatore Leister Patané; João Paulo Kitajima; João Pessoa Araújo Jr.; Leila Sabrina Ullmann; Loyze Paola Oliveira de Lima; Luiz Aurelio de Campos Crispin. Centro de Genômica Funcional da ESALQ: Luiz Lehmann Coutinho; Luiz Carlos Junior de Alcantara; Lívia Sacchetto; Maísa C. Pereira Parra; Maria Carolina Elias; Marta Giovanetti; Marília Moraes; Maurício Lacerda Nogueira. Prefeitura de Sao Paulo: Melissa Palmieri.; Patricia Akemi Assato; Paula Rahal; Paulo Inacio da Costa; Rafael dos Santos Bezerra; Raquel de Lello Rocha Campos Cassano. NGS Soluções Genômicas: Pilar Drummond Sampaio Corrêa Mariani. FZEA-USP Pirassununga: Mirele Daiana Poleti; Raul Machado Neto; Ricardo Augusto Brassaloti; Ricardo Haddad; Rodrigo Tocantins Calado. FAMERP-SJRP: Cecília Artico Banho; Sandra Coccuzzo Sampaio; Svetoslav Nanev Slavov; Vagner Fonseca; Vincent Louis Viala |
| EPI_ISL_2090615                                                                                                                                                                                                                                                        | VIROLOGY, AFRIMS                                                             | VIROLOGY, AFRIMS                                                                                                                   | A.T.; Chinnawirotpisan, P.; Chua; Claire Navarro, F.; Corazon Diones, P.; D. Jr.; Fernandez, S.; H. Jr.; Huang; J.M.; Jones, A.; Joonlasak, K.; Klungthong, C.; M.T.; Manasatienkij, W.; Tabinas; V. II; Valderama; Velasco; Villa                                                                                                                                                                                                                                                                                                                                                                                                                                                                                                                                                                                                                                                                                                                                                                                                                                                                                                                                                                                                                                                                                                                                                                                                                                                                                                                                                                                   |
| EPI_ISL_1373916, EPI_ISL_1623834                                                                                                                                                                                                                                       | Vanderbilt University Medical Center                                         | Pathogen Discovery, Respiratory Viruses Branch, Division of Viral Diseases, Centers for Disease Control and Prevention             | Adam Retchless; Anna Kelleher; Anna Montmayeur; Anna Uehara; Brian Lynch; Clinton R. Paden; Haibin Wang; Han Jia Justin Ng; Jing Zhang; Justin Lee; Krista Queen; Mark Burroughs; Peter Cook; Rachel Marine; Suxiang Tong; Yan Li; Ying Tao                                                                                                                                                                                                                                                                                                                                                                                                                                                                                                                                                                                                                                                                                                                                                                                                                                                                                                                                                                                                                                                                                                                                                                                                                                                                                                                                                                          |
| EPI_ISL_700413                                                                                                                                                                                                                                                         | Vanguard CHC wc VGC                                                          | NHLS/UCT                                                                                                                           | Arash Irazadeh; Bruna Galvao; Carolyn Williamson; Deelan Doolabh; Diana Hardie; Innocent Mudau; Kruger Marais; Lynn Tyers; Marvin Hsiao; Stephen Korsman                                                                                                                                                                                                                                                                                                                                                                                                                                                                                                                                                                                                                                                                                                                                                                                                                                                                                                                                                                                                                                                                                                                                                                                                                                                                                                                                                                                                                                                             |
| EPI_ISL_833520                                                                                                                                                                                                                                                         | Veterinary Specialized Instute "Nis"                                         | Veterinary Specialized Institute "Kraljevo", Serbia                                                                                | Afonso, C.; Banovic Djeri, B.; Jankovic, M.; Jovanovic, T.; Knezevic, A.; Manic, M.; Petrovic, M.; Petrovic, T.; Sekler, M.; Tesovic, B.; Vidanovic, D.; Volkening, J.                                                                                                                                                                                                                                                                                                                                                                                                                                                                                                                                                                                                                                                                                                                                                                                                                                                                                                                                                                                                                                                                                                                                                                                                                                                                                                                                                                                                                                               |
| EPI_ISL_1817701                                                                                                                                                                                                                                                        | Victoria Hospital wc VHW                                                     | NHLS/UCT                                                                                                                           | Arash Irazadeh; Bruna Galvao; Carolyn Williamson; Deelan Doolabh; Diana Hardie; Innocent Mudau; Kruger Marais; Lynn Tyers; Marvin Hsiao; Stephen Korsman                                                                                                                                                                                                                                                                                                                                                                                                                                                                                                                                                                                                                                                                                                                                                                                                                                                                                                                                                                                                                                                                                                                                                                                                                                                                                                                                                                                                                                                             |
| EPI_ISL_436112, EPI_ISL_456471, EPI_ISL_456532, EPI_ISL_456533, EPI_ISL_456538, EPI_ISL_456542, EPI_ISL_456637                                                                                                                                                         | see above                                                                    | Victorian Infectious Diseases Reference Laboratory (VIDRL)                                                                         | Microbiological Diagnostic Unit Public Health Laboratory and Victorian Infectious Diseases Reference Laboratory, Doherty Institute                                                                                                                                                                                                                                                                                                                                                                                                                                                                                                                                                                                                                                                                                                                                                                                                                                                                                                                                                                                                                                                                                                                                                                                                                                                                                                                                                                                                                                                                                   |
| EPI_ISL_564076, EPI_ISL_565137, EPI_ISL_877577, EPI_ISL_877582, EPI_ISL_877583, EPI_ISL_933777, EPI_ISL_933779, EPI_ISL_962828, EPI_ISL_1033154, EPI_ISL_1913200, EPI_ISL_1913201, EPI_ISL_1913203, EPI_ISL_1913206, EPI_ISL_1913208, EPI_ISL_1913209, EPI_ISL_1913212 | see above                                                                    | Victorian Infectious Diseases Reference Laboratory (VIDRL)                                                                         | VIDRL and MDU-PHL                                                                                                                                                                                                                                                                                                                                                                                                                                                                                                                                                                                                                                                                                                                                                                                                                                                                                                                                                                                                                                                                                                                                                                                                                                                                                                                                                                                                                                                                                                                                                                                                    |
| EPI_ISL_419734                                                                                                                                                                                                                                                         | Victorian Infectious Diseases Reference Laboratory (VIDRL)                   | Victorian Infectious Diseases Reference Laboratory and Microbiological Diagnostic Unit Public Health Laboratory, Doherty Institute | Caly L.; Caly, L.; Druce J.; M. B.; M.L.; N.L.; Sait, Sait, M.; Schultz; Seemann T.; Seemann, T.; Sherry; Sherry, N.                                                                                                                                                                                                                                                                                                                                                                                                                                                                                                                                                                                                                                                                                                                                                                                                                                                                                                                                                                                                                                                                                                                                                                                                                                                                                                                                                                                                                                                                                                 |
| EPI_ISL_904956                                                                                                                                                                                                                                                         | Vilnius University Hospital Santaros Klinikos, Vilnius University            | Institute of Biotechnology, Life Sciences Center, Vilnius University                                                               | Albertas Timinskas; Alma Gedvilaite; Aurelija Zvirbliene; Daniel Naumovas; Emilija Vasilunaitė; Laimonas Griskevičius; Milda Norkiene                                                                                                                                                                                                                                                                                                                                                                                                                                                                                                                                                                                                                                                                                                                                                                                                                                                                                                                                                                                                                                                                                                                                                                                                                                                                                                                                                                                                                                                                                |
| EPI_ISL_933897, EPI_ISL_1005471                                                                                                                                                                                                                                        | Vilnius university hospital Santaros Klinikos, Center of Laboratory Medicine | Vilnius university hospital Santaros Klinikos, Center of Laboratory Medicine                                                       | Daniel Naumovas; Dovile Ezerskyte; Gytis Dudas; Ingrida Olendraite; Justinas Slikas; Laimonas Griskevičius; Rimvydas Norvilas                                                                                                                                                                                                                                                                                                                                                                                                                                                                                                                                                                                                                                                                                                                                                                                                                                                                                                                                                                                                                                                                                                                                                                                                                                                                                                                                                                                                                                                                                        |
| EPI_ISL_1654001, EPI_ISL_1913364, EPI_ISL_1913900                                                                                                                                                                                                                      | Viollier AG                                                                  | Department of Biosystems Science and Engineering, ETH Zurich                                                                       | Andrea Patrignani; Andreia Cabral de Gouveia; Catharine Aquino; Chaoran Chen; Christiane Beckmann; Christoph Noppen; David Dreifuss; Deborah Penet; Doris Popovic; Emmanouil Dermitzakis; Griffin White; Henri Pegeot; Ioannis Xenarios; Ivan Topolsky; Jay Tracy; Katharina Jahn; Keith Harshman; Lara Fuhrmann; Laura Nef; Lennart Opitz; Lorenzo Cerutti; Maria Domenica Moccia; Maurice Redondo; Niko Beerenwinkel; Noemie Santamaria de Souza; Olivier Kobel; Philipp Jablonski; Ralph Schlapbach; Sarah Nadeau; Simon Gruter; Sophie Seidel; Parja Stadler; Timothy Sykes                                                                                                                                                                                                                                                                                                                                                                                                                                                                                                                                                                                                                                                                                                                                                                                                                                                                                                                                                                                                                                      |
| EPI_ISL_486493, EPI_ISL_1361159, EPI_ISL_1598688, EPI_ISL_2019197, EPI_ISL_2019374                                                                                                                                                                                     | Viollier AG                                                                  | Department of Biosystems Science and Engineering, ETH Zurich                                                                       | Andrea Patrignani; Andreia Cabral de Gouveia; Catharine Aquino; Chaoran Chen; Christian Beisel; Christiane Beckmann; Christoph Noppen; David Dreifuss; Doris Popovic; Elodie Burcklen; Griffin White; Ina Nissen; Ivan Topolsky; Jay Tracy; Katharina Jahn; Lara Fuhrmann; Laura Nef; Lennart Opitz;                                                                                                                                                                                                                                                                                                                                                                                                                                                                                                                                                                                                                                                                                                                                                                                                                                                                                                                                                                                                                                                                                                                                                                                                                                                                                                                 |

|                                                                                                                                                                                                                                                                                                                                                                                                                                    |                                                                                                                                                                                  |                                                                                                                                                                                                                                                           |                                                                                                                                                                                                                                                                                                                                                                                                                                                                                                                                                                                                                                                |
|------------------------------------------------------------------------------------------------------------------------------------------------------------------------------------------------------------------------------------------------------------------------------------------------------------------------------------------------------------------------------------------------------------------------------------|----------------------------------------------------------------------------------------------------------------------------------------------------------------------------------|-----------------------------------------------------------------------------------------------------------------------------------------------------------------------------------------------------------------------------------------------------------|------------------------------------------------------------------------------------------------------------------------------------------------------------------------------------------------------------------------------------------------------------------------------------------------------------------------------------------------------------------------------------------------------------------------------------------------------------------------------------------------------------------------------------------------------------------------------------------------------------------------------------------------|
|                                                                                                                                                                                                                                                                                                                                                                                                                                    |                                                                                                                                                                                  |                                                                                                                                                                                                                                                           | Maria Domenica Moccia; Maurice Redondo; Mirjam Feldkamp; Natascha Santacroce; Niko Beerenwinkel; Noemie Santamaria de Souza; Olivier Kobel; Pedro Ferreira; Philipp Jablonski; Ralph Schlapbach; Rebecca Denes; Sarah Nadeau; Simon Grüter; Sophie Seidel; Susana Posada-Céspedes; Tanja Stadler; Timothy Sykes; Tobias Schär                                                                                                                                                                                                                                                                                                                  |
| EPI_ISL_2017869                                                                                                                                                                                                                                                                                                                                                                                                                    | Viral Respiratory Infections Laboratory, Cantacuzino National Military-Medical Institute                                                                                         | Cantacuzino Institute Virology                                                                                                                                                                                                                            | Catalina Pascu; Luiza Ustea; Mihaela Lazar; Mihaela Oprea; Nicoleta Paraschiv; Sorin Dinu                                                                                                                                                                                                                                                                                                                                                                                                                                                                                                                                                      |
| EPI_ISL_417948, EPI_ISL_447596, EPI_ISL_965122, EPI_ISL_965123, EPI_ISL_965124, EPI_ISL_1623756, EPI_ISL_1623757, EPI_ISL_1623758, EPI_ISL_1785567, EPI_ISL_1972305, EPI_ISL_1972306, EPI_ISL_1972308, EPI_ISL_1972317, EPI_ISL_1972319, EPI_ISL_1972322, EPI_ISL_1972327, EPI_ISL_2135837, EPI_ISL_2135838, EPI_ISL_2135839, EPI_ISL_2135840, EPI_ISL_2135841, EPI_ISL_2135843, EPI_ISL_2135844, EPI_ISL_2135845, EPI_ISL_2135846 |                                                                                                                                                                                  |                                                                                                                                                                                                                                                           |                                                                                                                                                                                                                                                                                                                                                                                                                                                                                                                                                                                                                                                |
| see above                                                                                                                                                                                                                                                                                                                                                                                                                          | Viral Respiratory Lab, National Institute for Biomedical Research (INRB)                                                                                                         | Pathogen Sequencing Lab, National Institute for Biomedical Research (INRB)                                                                                                                                                                                | Allison Black; Amuri Aziza; Andrew Rambaut; Catherine Pratt; Eddy Kinganda-Lusamaki; Edith Nkwembe; Emmanuel Lokilo Lofiko; Francisca Muyembe Mawete; Ian Goodfellow; James Hadfield; Jean Claude Makangara; Jean-Claude Makangara Cigolo; Jean-Jacques Muyembe Tamfum; Josh Quick; Kristian Andersen; Matthias Pauthner; Michael Wiley; Nick Loman; Placide Mbaia-Kingebeni; Steve Ahuka-Mundeke; Trevor Bedford                                                                                                                                                                                                                              |
| EPI_ISL_2081468                                                                                                                                                                                                                                                                                                                                                                                                                    | Virginia Division of Consolidated Laboratory Services                                                                                                                            | Virginia Division of Consolidated Laboratory Services                                                                                                                                                                                                     | Virginia DCLS                                                                                                                                                                                                                                                                                                                                                                                                                                                                                                                                                                                                                                  |
| EPI_ISL_462000                                                                                                                                                                                                                                                                                                                                                                                                                     | Virology Department, Sheffield Teaching Hospitals NHS Foundation Trust/Department of Infection, Immunity and Cardiovascular Disease, The Medical School, University of Sheffield | COVID-19 Genomics UK (COG-UK) Consortium                                                                                                                                                                                                                  | Adri Angyal; Alex Keeley; Benjamin Lindsey; Cariad Evans; Danielle Groves; Dave Partridge; Katie Johnson; Laura Carrilero; Luke Green; Matthew Parker; Matthew Wyles; Mehmet Yavuz; Mohammad Raza; Nikki Smith; Paul Parsons; Rachel Tucker; Rebecca Brown; Thushan de Silva                                                                                                                                                                                                                                                                                                                                                                   |
| EPI_ISL_1191597, EPI_ISL_1191600, EPI_ISL_1191605, EPI_ISL_1827669, EPI_ISL_1827680, EPI_ISL_1827693                                                                                                                                                                                                                                                                                                                               | Virology Department, Victoria Hospital, Plaine-Wilhems, Mauritius                                                                                                                | National Institute for Communicable Diseases of the National Health Laboratory Service                                                                                                                                                                    | Allam M; Amoako DG; Baboo SB; Bhiman JN; Ismail A; Mahlangu B; Manraj SS; Mohale T; Ntuli N; Ramuth M; Scheepers C; Sonoo J                                                                                                                                                                                                                                                                                                                                                                                                                                                                                                                    |
| EPI_ISL_636987                                                                                                                                                                                                                                                                                                                                                                                                                     | Virology Lab, National Institute for Biomedical Research (INRB)                                                                                                                  | Project group Epidemiology of Highly Pathogenic Microorganisms, Robert Koch-Institute                                                                                                                                                                     | Eddy Kinganda-Lusamaki; Essia Belarbi; Fabian Leendertz; Gabriel Mbunso; Grit Schubert; Jasmin Schlotterbeck; Jean-Jacques Muyembe Tamfum; Sheila Makiala; Steve Ahuka-Mundeke                                                                                                                                                                                                                                                                                                                                                                                                                                                                 |
| EPI_ISL_1793786, EPI_ISL_2233370, EPI_ISL_2233377                                                                                                                                                                                                                                                                                                                                                                                  | Virology Laboratory, International Centre for Diarrhoeal Disease Research, Bangladesh (ICDDR,B)                                                                                  | Virology Laboratory, International Centre for Diarrhoeal Disease Research, Bangladesh (ICDDR,B)                                                                                                                                                           | Md. Mahfuzur Rahman; Mohammad Enayet Hossain; Mohammed Ziaur Rahman; Moju N Miah; Mustafizur Rahman; Rashedul Hasan                                                                                                                                                                                                                                                                                                                                                                                                                                                                                                                            |
| EPI_ISL_2036805                                                                                                                                                                                                                                                                                                                                                                                                                    | Virology Laboratory, Scientific Department, Army Medical Center                                                                                                                  | Virology Laboratory, Scientific Department, Army Medical Center                                                                                                                                                                                           | Anella Monte; Anna Anselmo; Antonella Fortunato; Filippo Molinari; Florigio Lista; Francesco Giordani; Giancarlo Petralito; Giandomenico Cerreto; Riccardo De Sanctis; Silvia Fillo; Vanessa Vera Fain                                                                                                                                                                                                                                                                                                                                                                                                                                         |
| EPI_ISL_677634, EPI_ISL_1660225, EPI_ISL_1660233, EPI_ISL_1660244, EPI_ISL_1660247, EPI_ISL_1660248, EPI_ISL_1660309, EPI_ISL_1660317, EPI_ISL_1660334, EPI_ISL_1672387, EPI_ISL_1672388, EPI_ISL_1672389                                                                                                                                                                                                                          |                                                                                                                                                                                  |                                                                                                                                                                                                                                                           |                                                                                                                                                                                                                                                                                                                                                                                                                                                                                                                                                                                                                                                |
| see above                                                                                                                                                                                                                                                                                                                                                                                                                          | Virology Unit, Institut Pasteur de Madagascar                                                                                                                                    | Virology Unit, Institut Pasteur de Madagascar                                                                                                                                                                                                             | Angela Brisebarre; Camille Capel; Cara E. Brook; Christian Ranaivoson; Christophe Malabat; Corinne Maufrais; Cristina M. Tato; Emmanuelle Permal; Etienne Simon-Lorière; Frédéric Lemoine; Helisoa Razafimanjato; Jean-Michel Heraud; Joseph L. DeRisi; Louise Lefrançois; Marion Barbet; Maud Vanpeene; Michelle Tan; Méline Bizard; Norosoa Razanajatovo; Philippe Dussart; Soa Fy Andriamandimby; Sylvie Behillil; Sylvie van der Werf; Tsiiry Randriambolanantsoa; Vida Ahyong; Vincent Enouf; Vololoniaina Raharinosy                                                                                                                     |
| EPI_ISL_918376, EPI_ISL_1098606, EPI_ISL_1532802, EPI_ISL_1532806, EPI_ISL_1534535, EPI_ISL_1534539, EPI_ISL_1711984, EPI_ISL_1818962, EPI_ISL_1818966, EPI_ISL_2106254, EPI_ISL_2106259, EPI_ISL_2231575                                                                                                                                                                                                                          |                                                                                                                                                                                  |                                                                                                                                                                                                                                                           |                                                                                                                                                                                                                                                                                                                                                                                                                                                                                                                                                                                                                                                |
| see above                                                                                                                                                                                                                                                                                                                                                                                                                          | Virology Unit, Institut Pasteur du Cambodge                                                                                                                                      | Virology Unit, Institut Pasteur du Cambodge                                                                                                                                                                                                               | Cecile Troupin; Chau Darapeak; Chin Savuth; Erik A Karlsson; Etienne Simon-Lorière; Jurje Y Siegers; Kraing Sidonn; Leakhena Pum; Ly Sovann; Sokhoun Yann; Teyputita Ou; Veasna Duong; Yi Sengdoeurm                                                                                                                                                                                                                                                                                                                                                                                                                                           |
| EPI_ISL_411902                                                                                                                                                                                                                                                                                                                                                                                                                     | Virology Unit, Institut Pasteur du Cambodge.                                                                                                                                     | Virology Unit, Institut Pasteur du Cambodge (Sequencing done by: Jessica E Manning/Jennifer A Bohl at Malaria and Vector Research Research Laboratory, National Institute of Allergy and Infectious Diseases and Vida Ahyong from Chan-Zuckerberg Biohub) | Erik A Karlsson; Jennifer A Bohl; Jessica E Manning.; Philippe Dussart; Veasna Duong; Vida Ahyong                                                                                                                                                                                                                                                                                                                                                                                                                                                                                                                                              |
| EPI_ISL_416458                                                                                                                                                                                                                                                                                                                                                                                                                     | Virology laboratory Ministry of Health Kuwait sequenced at Dasman Diabetes Institute                                                                                             | Dasman Diabetes Institute                                                                                                                                                                                                                                 | Ebaa alOzairi; Fahd Al-Mulla; Motasem Melhem; Qais Al-Duwairi; Rasheeba iqbal; Sara Alqabandi; Sumi John                                                                                                                                                                                                                                                                                                                                                                                                                                                                                                                                       |
| EPI_ISL_450268, EPI_ISL_1372316, EPI_ISL_1372317                                                                                                                                                                                                                                                                                                                                                                                   | WHO National Influenza Centre Russian Federation                                                                                                                                 | WHO National Influenza Centre Russian Federation                                                                                                                                                                                                          | Andrey Komissarov; Anna Ivanova; Artem Fadeev; Daria Danilenko; Dmitry Bazhenov; Dmitry Lioznov; Elena Nabieva; Georgii Bazykin; Ksenia Komissarova; Ksenia Safina; Kseniya Komissarova; Maria Pisareva; Maria Timofeeva; Mariia Pisareva; Mariia Sergeeva; Mariia Timofeeva; Tamila Musaeva; Veronica Eder; Veronica Eder                                                                                                                                                                                                                                                                                                                     |
| EPI_ISL_860812                                                                                                                                                                                                                                                                                                                                                                                                                     | WHO/Minsk                                                                                                                                                                        | Charité Universitätsmedizin Berlin, Institut für Virologie                                                                                                                                                                                                | Barbara Mühlemann; Christian Drosten; Julia Schneider; Julia Tesch; Jörn Beheim-Schwarzbach; Shmialiova Natalia; Sivets Natalia; Talitha Veith; Terry Jones; Tobias Bleicker; Victor M Corman                                                                                                                                                                                                                                                                                                                                                                                                                                                  |
| EPI_ISL_1239552                                                                                                                                                                                                                                                                                                                                                                                                                    | WSSE w Bydgoszcz-laboratorium                                                                                                                                                    | 1. National Institute of Public Health - National Institute of Hygiene; 2. Eurofins Genomics Europe Sequencing GmbH                                                                                                                                       | ECDC COVID-19 WGS support team; Eurofins Genomics Europe Sequencing Team; Gierczyki Rafa; Sadkowska-Todys Magorzata; Wokowicz Tomasz; Zacharczuk Katarzyna                                                                                                                                                                                                                                                                                                                                                                                                                                                                                     |
| EPI_ISL_2105620                                                                                                                                                                                                                                                                                                                                                                                                                    | WSSE w Gdansk                                                                                                                                                                    | 1. Academic Center for Pathomorphological and Genetic-Molecular Diagnostics Ltd, Bialystok, Poland 2. National Institute of Public Health - National Institute of Hygiene, Warsaw, Poland                                                                 | Anetta Sulewska; Jacek Nikliski; Janusz Dzicio; Joanna Kiluk; Katarzyna Zacharczuk; Konrad Raczkowski; Magdalena Nowakowska; Magorzata Sadkowska-Todys; Piotr Karabowicz; Piotr Majewski; Przemyslaw Biecek. Joanna Resze; Radosaw Charkiewicz; Tomasz Wokowicz                                                                                                                                                                                                                                                                                                                                                                                |
| EPI_ISL_1937696                                                                                                                                                                                                                                                                                                                                                                                                                    | WY Public Health Laboratory                                                                                                                                                      | Centers for Disease Control and Prevention Division of Viral Diseases, Pathogen Discovery                                                                                                                                                                 | Alison Laufer Halpin; Ben L. Rambo-Martin; Clinton R. Paden; Dakota Howard; Darlene Wagner; Dave Wentworth; Dhvani Batra; Jasmine Padilla; Justin Lee; Katie Dillon; Krista Queen; Kristen Knipe; Kristine Lacey; Mark Burroughs; Matthew Schmeer; Mili Sheth; Peter Cook; Sam Shepard; Sarah Nobles; Shoshona Le; Suxiang Tong; Vivien Dugan; Yvette Unoarumhi                                                                                                                                                                                                                                                                                |
| EPI_ISL_676993                                                                                                                                                                                                                                                                                                                                                                                                                     | Wadsworth Center, New York State Department.of Health                                                                                                                            | Wadsworth Center, New York State Department.of Health                                                                                                                                                                                                     | Alexis Russel; Daryl M. Lamson; Erasmus Schneider; Erica Lasek-Nesselquist; John Kelly; Jonathan Plitnick; Kirsten St. George; Navjot Singh; Sara Griesemer                                                                                                                                                                                                                                                                                                                                                                                                                                                                                    |
| EPI_ISL_456193, EPI_ISL_548064, EPI_ISL_649124, EPI_ISL_707794, EPI_ISL_1315313                                                                                                                                                                                                                                                                                                                                                    | Waikato Hospital                                                                                                                                                                 | Institute of Environmental Science and Research (ESR)                                                                                                                                                                                                     | Anja Werno; Antje van der Linden; Arlo Upton; Chris Mansell; David Hammer; Dragana Drinkovic; Erasmus Smit; Gary McAuliffe; Hana Sofia Andersson; Hermes Perez; James Ussher; Jill Sherwood; Joep de Lig; Josh Freeman; Julia Howard; Juliet Elvy; Lauren Jelly; Mary DeAlmeida; Matt Blakiston; Matt Storey; Matthew Rogers; Max Bloomfield; Michael Addidle; Michelle Balm; Muhammad Faisal; Nikki Freed; Olin Silander; Olivia Stroeven; Rachel Boyle; Sally Roberts; SallyAnn Harbison; Sarah Jefferies; Sharmini Muttaiyah; Susan Morpeth; Susan Taylor; Timothy Blackmore; Vani Sathyendran; Veronica Playle; Virginia Hope; Xiaoyun Ren |
| EPI_ISL_417153                                                                                                                                                                                                                                                                                                                                                                                                                     | Washington State Department of Health                                                                                                                                            | Seattle Flu Study                                                                                                                                                                                                                                         | Chu et al                                                                                                                                                                                                                                                                                                                                                                                                                                                                                                                                                                                                                                      |
| EPI_ISL_456187, EPI_ISL_456319, EPI_ISL_456339                                                                                                                                                                                                                                                                                                                                                                                     | Wellington SCL                                                                                                                                                                   | Institute of Environmental Science and Research (ESR)                                                                                                                                                                                                     | Anja Werno; Antje van der Linden; Arlo Upton; Chris Mansell; David Hammer; Dragana Drinkovic; Erasmus Smit; Gary McAuliffe; Hana Sofia Andersson; James Ussher; Jill Sherwood; Joep de Lig; Josh Freeman; Julia Howard; Juliet Elvy; Lauren Jelly; Mary DeAlmeida; Matt Blakiston; Matt Storey; Matthew Rogers; Max Bloomfield; Michael Addidle; Michelle Balm; Sally Roberts; Sarah Jefferies; Sharmini Muttaiyah; Susan Morpeth; Susan Taylor; Timothy Blackmore; Vani Sathyendran; Veronica Playle; Virginia Hope; Xiaoyun Ren                                                                                                              |
| EPI_ISL_649123, EPI_ISL_649125, EPI_ISL_1250695                                                                                                                                                                                                                                                                                                                                                                                    | Wellington SCL (WN)                                                                                                                                                              | Institute of Environmental Science and Research (ESR)                                                                                                                                                                                                     | Anja Werno; Antje van der Linden; Arlo Upton; Chris Mansell; David Hammer; Dragana Drinkovic; Erasmus Smit; Gary McAuliffe; Hana Sofia Andersson; Hermes Perez; James Ussher; Jill Sherwood; Joep de Lig; Josh Freeman; Julia Howard; Juliet Elvy; Lauren Jelly; Mary DeAlmeida; Matt Blakiston; Matt Storey; Matthew Rogers; Max Bloomfield; Michael Addidle; Michelle Balm; Muhammad Faisal; Nikki Freed; Olin Silander; Olivia Stroeven; Rachel Boyle; Sally Roberts; SallyAnn Harbison; Sarah Jefferies; Sharmini Muttaiyah; Susan Morpeth; Susan Taylor; Timothy Blackmore; Vani Sathyendran; Veronica Playle; Virginia Hope; Xiaoyun Ren |
| EPI_ISL_1255199, EPI_ISL_1255233, EPI_ISL_1255267, EPI_ISL_1255269, EPI_ISL_1255274                                                                                                                                                                                                                                                                                                                                                | West African Centre for Cell Biology of Infectious Pathogens (WACCBIP), University of Ghana, Accra, Ghana                                                                        | West African Centre for Cell Biology of Infectious Pathogens (WACCBIP), University of Ghana, Volta Road, Legon-Accra, Ghana                                                                                                                               | ; Abdoulaye B Diallo; Abdul-Karim Abass; Aisha Mohammed; Benjamin Demah Nuertey; Collins M. Morang'a; Dam Kenneth Mibut; Dominic S.Y. Amuzu; Emmanuella Amoako4; Evelyn B. Quansah; Frederick Kumi-Ansah; Frederick Tei-Maya; Gordon A Awandare; Joyce M. Ngoi; Kesego Tapela; Lucas N. Amenga-Etego; Nelson Kibinge; Oliver D Boakye5; Peter K Quashie; Philip M. Soglo; Samirah Said; Samuel Kaba Akoriyea; Theophilus Odoom; Vanessa                                                                                                                                                                                                        |



|                                                                                                      |                                                                                                                             |                                                                                                                                           |                                                                                                                                                                                                                                                                                                                                                                                                                                                                                                                                                                                                                                                                                                                                                                                                                                  |
|------------------------------------------------------------------------------------------------------|-----------------------------------------------------------------------------------------------------------------------------|-------------------------------------------------------------------------------------------------------------------------------------------|----------------------------------------------------------------------------------------------------------------------------------------------------------------------------------------------------------------------------------------------------------------------------------------------------------------------------------------------------------------------------------------------------------------------------------------------------------------------------------------------------------------------------------------------------------------------------------------------------------------------------------------------------------------------------------------------------------------------------------------------------------------------------------------------------------------------------------|
| EPI_ISL_1255105                                                                                      | West African Centre for Cell Biology of Infectious Pathogens (WACCBIP), University of Ghana, Volta Road, Legon-Accra, Ghana | West African Centre for Cell Biology of Infectious Pathogens (WACCBIP), University of Ghana, Volta Road, Legon-Accra, Ghana               | Magnussen; Vincent Appiah; Yaw Bediako<br>; Abdoulaye B Diallo; Abdul-Karim Abass; Aisha Mohammed; Benjamin Demah Nuertey; Collins M. Morang'a; Dam Kenneth Mibut; Dominic S.Y. Amuzu; Emmanuella Amoako4; Evelyn B. Quansah; Frederick Kumi-Ansah; Frederick Tei-Maya; Gordon A Awandare; Joyce M. Ngoi; Kesege Tapela; Lucas N. Amenga-Etego; Nelson Kibinge; Oliver D Boakye5; Peter K Quashie; Philip M. Soglo; Samirah Saïid; Samuel Kaba Akoriyea; Theophilus Odoom; Vanessa Magnussen; Vincent Appiah; Yaw Bediako                                                                                                                                                                                                                                                                                                        |
| EPI_ISL_451354, EPI_ISL_451356                                                                       | West China Hospital of Sichuan University                                                                                   | State Key Laboratory of Biotherapy of Sichuan University                                                                                  | Baowen Du; Binwu Ying; Chao Tang; Chuan Chen; Hancheng Wei; Jia Geng; Jing-wen Lin; Lu Chen; Mingxia Yu; Minjin Wang; Weimin Li; Yongzhao Zhou                                                                                                                                                                                                                                                                                                                                                                                                                                                                                                                                                                                                                                                                                   |
| EPI_ISL_2248755                                                                                      | Wichita State University - Molecular Diagnostics Lab                                                                        | Kansas Health and Environmental Lab                                                                                                       | Ben Olsen; Jonathan Barnell; Mike Grose; and Phil Adam                                                                                                                                                                                                                                                                                                                                                                                                                                                                                                                                                                                                                                                                                                                                                                           |
| EPI_ISL_2107906, EPI_ISL_2241380                                                                     | Wojewodzka Stacja Sanitarno-Epidemiologiczna w Olsztynie, Laboratorium Badan Epidemiologiczno-Klinicznych                   | Wojewodzka Stacja Sanitarno-Epidemiologiczna w Olsztynie, Laboratorium Badan Epidemiologiczno-Klinicznych                                 | Aleksandra Kobiatko; Barbara Dolinska; Emilia Tarabas; Ewa Liszewska; Marta Lukian; Monika Czerminska; Patryk Bielecki; Paulina Rozycka; Sylwia Krzetowska; Tomasz Jakubczak                                                                                                                                                                                                                                                                                                                                                                                                                                                                                                                                                                                                                                                     |
| EPI_ISL_708812                                                                                       | World Medical Hospital                                                                                                      | National Institute of Health, Department of Medical Sciences, Ministry of Public Health, Thailand                                         | Malinee Chittaganpitch; Pakorn Pirontong; Pilailuk Okada; Siripaporn Phuygun; Sittiporn Parmmen; Sunthareeya Waicharoen; Thanutsapa Thanadachakul; Warawan Wongboot                                                                                                                                                                                                                                                                                                                                                                                                                                                                                                                                                                                                                                                              |
| EPI_ISL_402132                                                                                       | Wuhan Jinyintan Hospital                                                                                                    | Hubei Provincial Center for Disease Control and Prevention                                                                                | Bin Fang; Bo Yang; Bo Yu; Faxian Zhan; Guojun Ye; Jing Li; Junqiang Xu; Kun Cai; Linlin Liu; Xiang Li; Xiao Yu; Xixiang Huo; Yongzhong Jiang.                                                                                                                                                                                                                                                                                                                                                                                                                                                                                                                                                                                                                                                                                    |
| EPI_ISL_402130                                                                                       | Wuhan Jinyintan Hospital                                                                                                    | Wuhan Institute of Virology, Chinese Academy of Sciences                                                                                  | Ding-Yu Zhang; Hao-Rui Si; Lei Zhang; Peng Zhou; Xing-Lou Yang; Yan Zhu; Zhengli Shi                                                                                                                                                                                                                                                                                                                                                                                                                                                                                                                                                                                                                                                                                                                                             |
| EPI_ISL_1032631, EPI_ISL_1167108, EPI_ISL_1938906, EPI_ISL_2015224, EPI_ISL_2018099, EPI_ISL_2193335 | Wyoming Public Health Laboratory                                                                                            | Wyoming Public Health Laboratory                                                                                                          | Ashley Norberg; Bailey Bowcutt; Brian Dominguez; Brittany Oher; Cari Sloma; Channing Weber; Chayse Rowley; Elliot Thomasson; Jim Mildnerberger; Lynette Gumbleton; Marley Goetz; Noah Hull; Sam Britz; Taylor Fearing; Wanda Manley; and Rob Christensen; and Wanda Manley                                                                                                                                                                                                                                                                                                                                                                                                                                                                                                                                                       |
| EPI_ISL_1292986, EPI_ISL_2159581                                                                     | Yale Clinical Virology Lab                                                                                                  | Grubaugh Lab - Yale School of Public Health                                                                                               | Anderson Brito; Annie Watkins; Chaney Kalinich; Chantal Vogels; Isabel Ott; Isabell Ott; Jessica Rothman; Joseph Fauver; Mallery Breban; Marie L. Landry; Mary Petrone; Nathan Grubaugh; Tara Alpert                                                                                                                                                                                                                                                                                                                                                                                                                                                                                                                                                                                                                             |
| EPI_ISL_729766                                                                                       | Yale Pathology Lab                                                                                                          | Grubaugh Lab - Yale School of Public Health                                                                                               | Adam Moore; Akiko Iwasaki; Albert Ko; Alice Lu; Allison Nelson; Anderson Brito; Anne Wylie; Annie Watkins; Arnau Casanovas; Catherine Muenker; Chaney Kalinich; Chantal Vogels; Charlese Dela Cruz; Isabel Ott; Joseph Fauver; Maria Tokuyama; Mary Petrone; Nathan Grubaugh; Patrick Wong; Peiwen Lu; Richard Martinello; Saad Omer; Shelli Farhadian; Tara Alpert                                                                                                                                                                                                                                                                                                                                                                                                                                                              |
| EPI_ISL_1911195, EPI_ISL_1911197, EPI_ISL_1911250                                                    | Zhejiang Provincial Center for Disease Control and Prevention Zhoushan Center for Disease Prevention and Control            | Zhejiang Province Center of Disease Control and prevention                                                                                | Bing WU; Hongling Wang; Yanjun Zhang                                                                                                                                                                                                                                                                                                                                                                                                                                                                                                                                                                                                                                                                                                                                                                                             |
| EPI_ISL_468134                                                                                       | [Romania, Bucharest] National Institute for Infectious Diseases "Prof. Dr. Matei Bal"                                       | [Romania, Bucharest] National Institute for Infectious Diseases "Prof. Dr. Matei Bal"                                                     | Corina Casangiu; Leontina Banica; Marius Cotic; Marius Surleac; Simona Paraschiv                                                                                                                                                                                                                                                                                                                                                                                                                                                                                                                                                                                                                                                                                                                                                 |
| EPI_ISL_1141106                                                                                      | amedes MVZ Hannover                                                                                                         | Robert Koch Institute                                                                                                                     |                                                                                                                                                                                                                                                                                                                                                                                                                                                                                                                                                                                                                                                                                                                                                                                                                                  |
| EPI_ISL_829316, EPI_ISL_830194, EPI_ISL_830247                                                       | deCODE genetics                                                                                                             | deCODE genetics                                                                                                                           | Agnar Helgason; Alma Moller; Arna B Agustsdottir; Arnaldur Gylfason; Asgeir Sigurdsson; Aslaug Jonasdottir; Berglind Eiriksdottir; Bjarni Thorbjornsson; Brynjar O Jenson; Daniel F Gudbjartsson; Droplaug N Magnusdottir; Elisabet E Gardarsdottir; Emil A Thorarensen; Gardar Sveinbjornsson; Gisli Masson; Gudmundur Georgsson; Gudmundur L Norddahl; Gudrun Sigmundsdottir; Hakon Jonsson; Hannes Eggertsson; Hilma Holm; Ingileif Jonsdottir; Jona Saemundsdottir; Kamilla S Josefsdottir; Kari Stefansson; Karl G Kristinsson; Kjartan R Gudmundsson; Kristin E Sveinsdottir; Louise le Roux; Maney Sveinsdottir; Olafia S Gretarsdottir; Olafur T Magnusson; Pall Melsted; Patrick Sulem; Run Fridriksdottir; Solvi Rognvaldsson; Thora R Gunnarsdottir; Thordur Kristjansson; Thorolfur Gudnason; Unnur Thorsteinsdottir |
| EPI_ISL_959391, EPI_ISL_959407                                                                       | genXone SA, Molecular Diagnostics Laboratory / NZOZ                                                                         | genXone SA, Research & Development Laboratory                                                                                             | Aleksandra Gidlewicz; Anna Brylak-Baszków; Grzegorz Nowicki; Jakub Grabowski; Karol Szeszko; Maciej Sykulski; Micha Kaszuba; Natalia Drwska-Matelska; ukasz Krych                                                                                                                                                                                                                                                                                                                                                                                                                                                                                                                                                                                                                                                                |
| EPI_ISL_1063853                                                                                      | inDNA Life Sciences Private Limited, Bhubaneswar                                                                            | Immunogenomics lab, Institute of Life Sciences, Bhubaneswar                                                                               | Ajay Parida; Amol M. Kanampalliwar; Arup Ghosh; Atimukta Jha; INSACOG Consortium; Kirtal Hansdah; Punit Prasad; Rajeeb Swain; Rupesh Dash; Safal Wallia; Shifu Aggarwal; Sunil K. Raghav                                                                                                                                                                                                                                                                                                                                                                                                                                                                                                                                                                                                                                         |
| EPI_ISL_1235687                                                                                      | laboratorio de salud pública (Bogotá)                                                                                       | Gencore- Universidad de los Andes                                                                                                         | Alejandro Gómez; David González; Johana Hernandez Gabriela Delgado; Luisa Sacristán; Marcela Guevara-Suarez; Silvia Restrepo                                                                                                                                                                                                                                                                                                                                                                                                                                                                                                                                                                                                                                                                                                     |
| EPI_ISL_458286                                                                                       | unknown                                                                                                                     | Bundeswehr Institute of Microbiology                                                                                                      | Antwerpen; Bestehorn-Willmann; Eckstein, S.; Handrick, S.; M.C.; M.H.; M.S.; Naija, H.; R. and Ben Moussa, M.; Rehn, A.; Stoecker, K.; Walter; Woelfel                                                                                                                                                                                                                                                                                                                                                                                                                                                                                                                                                                                                                                                                           |
| EPI_ISL_463006                                                                                       | unknown                                                                                                                     | Clinical virology                                                                                                                         | Fares, W.; Triki, H.                                                                                                                                                                                                                                                                                                                                                                                                                                                                                                                                                                                                                                                                                                                                                                                                             |
| EPI_ISL_447640                                                                                       | unknown                                                                                                                     | Department of Medicine                                                                                                                    | Bampali, M.; Dovrolis, N.; Froukala, E.; Gatzidou, E.; Kassela, K.; N. and Karakasiliotis, I.; Spanakis; Stavropoulou, A.; Tsakris, A.; Veletza, S.                                                                                                                                                                                                                                                                                                                                                                                                                                                                                                                                                                                                                                                                              |
| EPI_ISL_1527025, EPI_ISL_1527027                                                                     | unknown                                                                                                                     | Incienza, Instituto Costarricense de Investigación y Enseñanza en Nutrición y Salud                                                       | Barboza-Arguedas E & Cerdas-Quesada C; Pérez-Corrales C; Pérez-Corrales C & Barboza-Arguedas E                                                                                                                                                                                                                                                                                                                                                                                                                                                                                                                                                                                                                                                                                                                                   |
| EPI_ISL_1738901, EPI_ISL_1738913, EPI_ISL_2248932, EPI_ISL_2249013, EPI_ISL_2249038                  | unknown                                                                                                                     | Instituto Nacional de Saude (INSA)                                                                                                        | Borges et al                                                                                                                                                                                                                                                                                                                                                                                                                                                                                                                                                                                                                                                                                                                                                                                                                     |
| EPI_ISL_2249161                                                                                      | unknown                                                                                                                     | Instituto Nacional de Saude (INSA) and Centro de Investigação em Biodiversidade e Recursos Genéticos (CIBIO), Universidade do Porto       | Borges et al                                                                                                                                                                                                                                                                                                                                                                                                                                                                                                                                                                                                                                                                                                                                                                                                                     |
| EPI_ISL_476559                                                                                       | unknown                                                                                                                     | Laboratoire Sciences et Technologies de la Santé (STS) Institut Supérieur des Sciences de la Santé Université Hassan 1er, Settat, Morocco | Abderraouf Hilali; Amal Souiri; Hajar Lemriss; Jawad Bouzid; Mustapha Moullif; Narjis Amar; Sanaâ Lemriss; Saâd EL Kabbaj; Touria Essayagh                                                                                                                                                                                                                                                                                                                                                                                                                                                                                                                                                                                                                                                                                       |
| EPI_ISL_483060                                                                                       | unknown                                                                                                                     | Microbiology, Canterbury Health Laboratories                                                                                              | Anderson, T.; Dilcher, M.                                                                                                                                                                                                                                                                                                                                                                                                                                                                                                                                                                                                                                                                                                                                                                                                        |
| EPI_ISL_434563                                                                                       | unknown                                                                                                                     | Microbiology, The University of Hong Kong                                                                                                 | K.-Y.; K.K.W. and Yuen; To                                                                                                                                                                                                                                                                                                                                                                                                                                                                                                                                                                                                                                                                                                                                                                                                       |
| EPI_ISL_1938308                                                                                      | unknown                                                                                                                     | PHV-FSS                                                                                                                                   | Son Nguyen                                                                                                                                                                                                                                                                                                                                                                                                                                                                                                                                                                                                                                                                                                                                                                                                                       |
| EPI_ISL_2103368                                                                                      | ÁREA DE SALUD DE SANTO DOMINGO                                                                                              | Incienza, Instituto Costarricense de Investigación y Enseñanza en Nutrición y Salud                                                       | Pérez-Corrales C & Blanco-Delgado C                                                                                                                                                                                                                                                                                                                                                                                                                                                                                                                                                                                                                                                                                                                                                                                              |
